# Supplementary material for: Persistent Petroleum Pollution: Microbial Responses in Bunger Hills, East Antarctica
Source: Research Square preprint supplement (doi:10.21203/rs.3.rs-6608817/v1), 2025-08-20
Supplement: Supplementary file 1 [file 68d9c831fbde1318cdfece91.xlsx]

## Sheet: Contents
Table	Description
S1	Soil physicochemical properties
S2	Kruskal-Wallis rank sum test for soil properties between study areas
S3	Dunn's post-hoc test for soil properties between study areas
S4	Kruskal-Wallis rank sum test for alpha diversity indices
S5	Dunn's post-hoc test for alpha diversity indices
S6	16S ASVs abundance and taxonomy
S7	18S ASVs abundance and taxonomy
S8	Influence of variables on 16S and 18S soil communities by ANOVA-like permutation tests
S9	Pairwise ADONIS test between sampling sites
S10	Metagenomic sequencing summary
S11	Summary of metagenome-assembled genomes (MAGs)
S12	Summary of metagenome-assembled genomes (MAGs) abundance per metagenome
S13	Log-fold genome equivalent abundance of predicted metabolic marker genes in metagenomes
S14	No. of copies of metabolic marker genes detected in MAGs
S15	Prevalence (%) of metabolic markers per phylum
S16	H2 oxidation rates
S17	16S, hhyL, rbcL1E RT-qPCR summary
S18	16S qPCR summary
S19	Radiolabelled 14CO2 results summary
S20	Wilcoxon rank sum test for radiolabelled 14CO2 results
S21	16S amplicon sequencing summary
S22	18S amplicon sequencing summary

## Sheet: S1
Table S1. Soil physicochemical properties
																		Total petroleum hydrocarbon fractions
Sample	Distance along transect (m)	Depth (cm)	Longitude	Latitude	Elevation (m.a.s.l.)	Transect	Moisture (%)	NH3-N (mg/kg)	NH4+-N (mg/kg)	NO3--N (mg/kg)	NO2--N (mg/kg)	Nox-N (mg/kg)	Reactive P (mg/kg)	P-Colwell (mg/kg)	TOC (%)	EC @ 25 °C (μS/cm)	pH	C10-C16 (mg/kg)	C16-C34 (mg/kg)	C34-C40 (mg/kg)	Sum C10-C40 (mg/kg)	C10-C16_SGC (mg/kg)	C16-C34_SGC (mg/kg)	C34-C40_SGC (mg/kg)	Sum C10-C40_SGC (mg/kg)
BH-01	47.3	5	100.602	-66.2501	3.29	Helipad Zone	5	0.1	0.2	0.4	0.1	0.4	0.6	5	0.1	60	7.7	50	100	100	50	50	100	100	50
BH-02	49	5	100.602	-66.2501	3.28	Helipad Zone	5.2	0.1	0.2	0.5	0.1	0.5	1.3	9	0.11	38	6.7	50	100	100	50	50	100	100	50
BH-03		5	100.602	-66.2501	3.29	Helipad Zone	6.2	0.1	1.1	1.1	0.1	1.1	0.5	8	0.21	92	6.9	50	100	100	50	50	100	100	50
BH-04		5	100.602	-66.2501	3.29	Helipad Zone	2	0.1	0.2	0.2	0.1	0.2	0.6	6	0.14	35	6.9	50	100	100	50	50	100	100	50
BH-05	45.5	5	100.602	-66.2501	3.31	Helipad Zone	4	0.1	0.2	0.2	0.1	0.2	1	6	0.16	33	7	50	100	100	50	50	100	100	50
BH-06	44.5	5	100.602	-66.2501	3.28	Helipad Zone	4	0.1	0.2	0.1	0.1	0.1	1.5	9	0.13	50	7.3	50	100	100	50	50	100	100	50
BH-07	50	5	100.602	-66.2501	3.29	Helipad Zone	3.8	0.1	0.2	0.7	0.1	0.7	0.1	5	0.06	48	7.3	50	100	100	50	50	100	100	50
BH-08	51	5	100.602	-66.2502	3.32	Helipad Transect	4.6	0.1	0.2	0.8	0.1	0.8	0.1	5	0.08	43	7.6	50	100	100	50	50	100	100	50
BH-09		5	100.602	-66.2501	3.19	Helipad Zone	5.2	0.1	0.2	0.1	0.1	0.1	0.1	5	0.34	17	7.1	50	1620	270	1890	50	640	110	750
BH-10		5	100.602	-66.2501	3.19	Helipad Zone	8	0.1	0.2	0.1	0.1	0.1	0.9	5	0.43	22	6.8	50	1660	270	1930	50	440	100	440
BH-11		20	100.602	-66.2501	2.94	Helipad Zone	12	0.1	0.2	0.1	0.1	0.1	0.5	8	0.13	32	6.5	50	190	100	190	50	100	100	50
BH-12		20	100.602	-66.2501	2.94	Helipad Zone	9.9	0.1	0.2	0.1	0.1	0.1	0.4	6	0.29	29	6.3	50	1250	200	1450	50	420	100	420
BH-13		41	100.602	-66.2501	2.72	Helipad Zone	13.3	0.1	0.2	0.1	0.1	0.1	0.2	5	0.1	34	6.6	50	100	100	50	50	100	100	50
BH-14		35	100.602	-66.2501	2.8	Helipad Zone	13.9	0.1	0.2	0.2	0.1	0.2	0.1	5	0.12	34	6.9	50	130	100	130	50	100	100	50
BH-15	0	5	100.603	-66.2498	3.75	Helipad Transect	12.1	0.1	2.2	0.5	0.1	0.5	0.1	5	0.14	16	7.2	50	100	100	50	50	100	100	50
BH-16	25	5	100.603	-66.25	3.3	Helipad Transect	2.8	0.1	0.2	1	0.1	1	0.2	5	0.13	18	7.4	50	100	100	50	50	100	100	50
BH-17	50	5	100.602	-66.2501	3.3	Helipad Zone	5.6	0.1	0.2	0.2	0.1	0.2	0.9	7	0.12	43	6.9	50	100	100	50	50	100	100	50
BH-18	75	5	100.602	-66.2503	3.44	Helipad Transect	7.5	0.1	0.2	1	0.1	1	0.3	5	0.25	66	8.5	50	100	100	50	50	100	100	50
BH-19	100	5	100.602	-66.2505	2.19	Helipad Transect	11.7	0.1	0.2	0.1	0.1	0.1	0.1	5	0.17	82	7.6	50	100	100	50	50	100	100	50
BH-20	0	5	100.604	-66.2503	5.79	Background Transect	3.4	0.1	0.2	0.2	0.1	0.2	0.8	6	0.09	48	8.8	50	100	100	50	50	100	100	50
BH-21	25	5	100.604	-66.2504	5.03	Background Transect	13.3	0.1	0.2	0.2	0.1	0.2	0.8	5	0.16	460	9.6	50	100	100	50	50	100	100	50
BH-22	50	5	100.603	-66.2506	4.78	Background Transect	14	0.1	0.2	0.5	0.1	0.5	0.1	5	0.3	53	7.9	50	100	100	50	50	100	100	50
BH-23	75	5	100.603	-66.2508	5.09	Background Transect	8	0.1	0.2	2	0.1	2	1.5	10	0.15	3540	10	50	100	100	50	50	100	100	50
BH-24	100	5	100.603	-66.2509	6.19	Background Transect	1.4	0.1	0.2	0.1	0.1	0.1	0.6	5	0.13	125	9	50	100	100	50	50	100	100	50
BH-25		5	100.602	-66.2501	3.03	Helipad Zone	13.7	0.1	0.2	0.1	0.1	0.1	0.2	5	0.07	29	8	50	100	100	50	50	100	100	50
BH-26		35	100.602	-66.2501	2.96	Helipad Zone	11.3	0.1	0.2	0.1	0.1	0.1	0.2	5	0.05	26	7.9	50	100	100	50	50	100	100	50
NOx: Nitrite plus Nitrate as total nitrogen; P-Colwell: Total phosphorus by Colwell test; TOC: Total carbon; EC: Electrical conductivity; SGC: Post-silica gel clean-up
															;.

## Sheet: S2
Table S2. Kruskal-Wallis rank sum test for soil properties between study areas
	χ2	df	p_value
Moisture	0.030169	2	0.985
pH	13.772	2	0.001022
NOx	4.3419	2	0.1141
P-Colwell	3.5354	2	0.1707
TOC	0.72999	2	0.6942
EC	7.9179	2	0.01908
C10-C40 (post-SGC)	2.029	2	0.3626
NOx: Nitrite plus Nitrate as total nitrogen; P-Colwell: Total phosphorus by Colwell test; TOC: Total carbon; EC: Electrical conductivity; C10-C40 (post-SGC): Total petroleum hydrocarbons (C10-C40 range) post-silica gel clean-up

## Sheet: S3
Table S3. Dunn's post-hoc test for soil properties between study areas
	Comparison	Z	P.unadj	P.adj
pH	Background Transect - Helipad Transect	1.47102	0.141287	0.141287
	Background Transect - Helipad Zone	3.58857	0.000332501	0.000997503
	Helipad Transect - Helipad Zone	1.7727	0.0762778	0.152556
EC	Background Transect - Helipad Transect	2.02729	0.042633	0.0852661
	Background Transect - Helipad Zone	2.78663	0.00532598	0.0159779
	Helipad Transect - Helipad Zone	0.284089	0.776342	0.776342
EC: Electrical conductivity

## Sheet: S4
Table S4. Kruskal-Wallis rank sum test for alpha diversity indices
16S
	index	χ2	df	p_value
1	chao1	7.09679	2	0.0287707
2	diversity_inverse_simpson	2.56239	2	0.277705
3	evenness_pielou	1.03846	2	0.594978
18S
	index	χ2	df	p_value
1	chao1	3.18056	2	0.203869
2	diversity_inverse_simpson	1.24038	2	0.537841
3	evenness_pielou	1.98462	2	0.37072

## Sheet: S5
Table S5. Dunn's post-hoc test for alpha diversity indices
16S
	Comparison	Z	P.unadj	P.adj	index
1	Background Transect - Helipad Transect	-2.31532	0.0205957	0.0411914	chao1
2	Background Transect - Helipad Zone	-0.392349	0.6948	0.6948	chao1
3	Helipad Transect - Helipad Zone	2.46574	0.0136731	0.0410194	chao1
4	Background Transect - Helipad Transect	-0.620174	0.535143	0.535143	diversity_inverse_simpson
5	Background Transect - Helipad Zone	0.778318	0.436381	0.872763	diversity_inverse_simpson
6	Helipad Transect - Helipad Zone	1.54388	0.122618	0.367854	diversity_inverse_simpson
7	Background Transect - Helipad Transect	-0.702863	0.482141	0.964282	evenness_pielou
8	Background Transect - Helipad Zone	0.146732	0.883343	0.883343	evenness_pielou
9	Helipad Transect - Helipad Zone	1.01437	0.310408	0.931225	evenness_pielou
18S
	Comparison	Z	P.unadj	P.adj	index
1	Background Transect - Helipad Transect	-1.07497	0.282389	0.564778	chao1
2	Background Transect - Helipad Zone	-1.78311	0.0745677	0.223703	chao1
3	Helipad Transect - Helipad Zone	-0.456146	0.648285	0.648285	chao1
4	Background Transect - Helipad Transect	-0.661519	0.50828	1	diversity_inverse_simpson
5	Background Transect - Helipad Zone	0.296654	0.766731	0.766731	diversity_inverse_simpson
6	Helipad Transect - Helipad Zone	1.11325	0.265601	0.796803	diversity_inverse_simpson
7	Background Transect - Helipad Transect	-0.620174	0.535143	1	evenness_pielou
8	Background Transect - Helipad Zone	0.612447	0.540242	0.540242	evenness_pielou
9	Helipad Transect - Helipad Zone	1.37801	0.168201	0.504604	evenness_pielou

## Sheet: S6
Table S6. 16S ASVs abundance and taxonomy
ID	Domain	Phylum	Class	Order	Family	Genus	Species	BH-01	BH-02	BH-03	BH-04	BH-05	BH-06	BH-07	BH-08	BH-09	BH-10	BH-11	BH-12	BH-13	BH-14	BH-15	BH-16	BH-17	BH-18	BH-19	BH-20	BH-21	BH-22	BH-23	BH-24	BH-25	BH-26
ASV_1	Bacteria	Proteobacteria	Alphaproteobacteria	Sphingomonadales	Sphingomonadaceae	Sphingobium	unclassified_Sphingobium	102	1829	0	311	0	0	0	0	2729	365	31833	7181	1088	685	0	0	1304	0	0	0	0	0	0	0	0	58
ASV_2	Bacteria	Proteobacteria	Gammaproteobacteria	Burkholderiales	Comamonadaceae	Polaromonas	unclassified_Polaromonas	920	615	205	1843	605	58	84	0	1402	387	3193	1584	4773	3635	188	15	368	0	0	0	0	0	0	0	547	16739
ASV_3	Bacteria	Actinobacteriota	Actinobacteria	Pseudonocardiales	Pseudonocardiaceae	Crossiella	unclassified_Crossiella	203	29	217	170	999	3153	597	8086	50	0	0	0	0	0	2624	6187	58	7307	864	1864	796	0	0	3363	30	0
ASV_4	Bacteria	Actinobacteriota	Actinobacteria	Micrococcales	Microbacteriaceae	Subtercola	unclassified_Subtercola	0	63	0	56	0	0	0	0	10840	2655	5814	6763	513	465	0	0	264	0	0	0	0	0	0	0	0	42
ASV_5	Bacteria	Proteobacteria	Gammaproteobacteria	Nitrosococcales	Nitrosococcaceae	wb1-P19	unclassified_wb1-P19	4606	0	3053	0	11851	155	793	1611	7	0	0	0	0	0	0	0	0	0	301	3045	0	0	18	104	1126	90
ASV_6	Bacteria	Proteobacteria	Gammaproteobacteria	Pseudomonadales	Pseudomonadaceae	Pseudomonas	frederiksbergensis	0	0	0	0	0	0	0	0	50	0	208	164	6822	7664	0	0	0	0	0	0	0	0	0	0	0	0
ASV_7	Bacteria	Proteobacteria	Alphaproteobacteria	Sphingomonadales	Sphingomonadaceae	Sphingomonas	echinoides	201	0	156	122	488	44	53	0	2889	520	7512	2424	112	50	0	0	0	0	0	0	0	0	0	0	10	0
ASV_8	Bacteria	Cyanobacteria	Cyanobacteriia	Phormidesmiales	Phormidesmiaceae	Phormidesmis ANT.LACV5.1	unclassified_Phormidesmis ANT.LACV5.1	29	98	204	740	6	27	1166	127	6	0	0	26	0	0	699	145	30	59	1109	108	8325	210	598	6	10	0
ASV_9	Archaea	Crenarchaeota	Nitrososphaeria	Nitrososphaerales	Nitrososphaeraceae	unclassified_Nitrososphaeraceae	unclassified_Nitrososphaeraceae	14	0	23	0	21	0	13	94	51	0	0	0	8	0	55	712	14	793	1610	13	0	9365	0	0	0	55
ASV_10	Bacteria	Bacteroidota	Bacteroidia	Chitinophagales	Chitinophagaceae	unclassified_Chitinophagaceae	unclassified_Chitinophagaceae	187	815	0	61	8	0	0	0	3965	502	0	619	36	62	0	0	5587	0	0	0	0	0	0	0	0	85
ASV_11	Bacteria	Proteobacteria	Gammaproteobacteria	Burkholderiales	Sutterellaceae	unclassified_Sutterellaceae	unclassified_Sutterellaceae	44	9	162	9	415	237	389	1095	0	0	0	0	0	0	610	153	17	3017	1604	862	993	1103	0	432	30	548
ASV_12	Bacteria	Actinobacteriota	Actinobacteria	Pseudonocardiales	Pseudonocardiaceae	Pseudonocardia	unclassified_Pseudonocardia	37	0	52	13	0	698	100	0	23	0	0	0	0	0	950	26	31	2286	5137	0	1260	1052	0	0	0	0
ASV_13	Bacteria	Actinobacteriota	Thermoleophilia	Solirubrobacterales	Solirubrobacteraceae	unclassified_Solirubrobacteraceae	unclassified_Solirubrobacteraceae	547	116	1076	1224	630	93	1265	652	25	0	0	0	0	0	460	774	1917	276	565	1148	182	0	0	417	57	42
ASV_14	Bacteria	Actinobacteriota	Actinobacteria	Corynebacteriales	Mycobacteriaceae	Mycobacterium	unclassified_Mycobacterium	207	267	0	901	62	400	0	0	251	125	942	728	5532	521	0	0	905	0	0	0	0	0	0	0	0	70
ASV_15	Bacteria	Actinobacteriota	Actinobacteria	Micrococcales	Microbacteriaceae	Parafrigoribacterium	unclassified_Parafrigoribacterium	0	0	0	0	0	0	0	0	4917	1677	2413	1822	31	23	0	0	0	0	0	0	0	0	0	0	0	0
ASV_16	Bacteria	Verrucomicrobiota	Verrucomicrobiae	Chthoniobacterales	Chthoniobacteraceae	Candidatus Udaeobacter	unclassified_Candidatus Udaeobacter	0	0	46	46	40	0	76	164	0	0	0	0	0	0	106	5964	0	2910	108	0	0	503	0	0	0	28
ASV_17	Bacteria	Cyanobacteria	Cyanobacteriia	Phormidesmiales	Nodosilineaceae	Nodosilinea PCC-7104	unclassified_Nodosilinea PCC-7104	0	15	270	106	0	0	266	45	0	0	0	24	0	0	4785	0	8	0	2914	25	653	298	0	9	7	10
ASV_18	Bacteria	Chloroflexi	KD4-96	unclassified_KD4-96	unclassified_KD4-96	unclassified_KD4-96	unclassified_KD4-96	39	0	111	35	390	71	185	334	21	0	0	0	0	0	510	0	19	23	380	2364	2004	81	784	2008	9	0
ASV_19	Archaea	Crenarchaeota	Nitrososphaeria	Nitrososphaerales	Nitrososphaeraceae	Candidatus Nitrocosmicus	unclassified_Candidatus Nitrocosmicus	0	0	0	0	0	0	0	0	0	0	0	0	0	0	342	855	0	160	412	0	4543	207	2761	42	0	0
ASV_20	Bacteria	Proteobacteria	Alphaproteobacteria	Sphingomonadales	Sphingomonadaceae	Sphingomonas	sediminicola	541	504	359	2998	377	138	476	263	30	0	0	61	327	137	232	23	2158	117	293	30	0	150	0	0	0	45
ASV_21	Bacteria	Actinobacteriota	Thermoleophilia	Gaiellales	Gaiellaceae	Gaiella	unclassified_Gaiella	68	0	134	0	622	0	136	265	238	0	0	0	0	0	2863	970	120	1154	220	590	0	1593	0	57	0	122
ASV_23	Bacteria	Acidobacteriota	Blastocatellia	Pyrinomonadales	Pyrinomonadaceae	RB41	unclassified_RB41	395	6	168	17	452	63	476	889	89	5	0	0	0	0	728	0	39	2165	366	292	0	1175	0	0	188	1052
ASV_24	Bacteria	Proteobacteria	Alphaproteobacteria	Rhizobiales	Xanthobacteraceae	Afipia	unclassified_Afipia	66	738	0	51	0	0	0	0	502	233	3308	2925	217	65	0	0	381	0	0	0	0	0	0	0	0	51
ASV_25	Bacteria	Actinobacteriota	Actinobacteria	Micrococcales	Microbacteriaceae	Galbitalea	unclassified_Galbitalea	0	128	0	0	0	0	0	0	2076	681	1473	1309	1862	832	0	0	156	0	0	0	0	0	0	0	0	0
ASV_26	Bacteria	Actinobacteriota	Actinobacteria	Micrococcales	Micrococcaceae	Arthrobacter	alpinus	1122	215	896	552	355	358	0	0	171	0	9	39	1585	133	0	0	779	0	0	0	0	0	0	0	135	2005
ASV_27	Bacteria	Proteobacteria	Alphaproteobacteria	unclassified_Alphaproteobacteria	unclassified_Alphaproteobacteria	unclassified_Alphaproteobacteria	unclassified_Alphaproteobacteria	0	0	0	0	0	0	0	0	0	0	0	0	0	0	0	0	0	0	0	144	3270	0	4553	281	0	0
ASV_28	Bacteria	Actinobacteriota	Rubrobacteria	Rubrobacterales	Rubrobacteriaceae	Rubrobacter	unclassified_Rubrobacter	86	0	75	70	331	0	373	607	0	0	0	0	0	0	318	824	0	2942	240	1026	0	461	0	793	29	0
ASV_29	Bacteria	Chloroflexi	KD4-96	unclassified_KD4-96	unclassified_KD4-96	unclassified_KD4-96	unclassified_KD4-96	0	0	0	0	0	0	0	0	0	0	0	0	0	0	42	0	0	0	0	240	3545	0	4036	243	0	0
ASV_30	Bacteria	Verrucomicrobiota	Verrucomicrobiae	Chthoniobacterales	Chthoniobacteraceae	Candidatus Udaeobacter	unclassified_Candidatus Udaeobacter	0	0	0	0	0	0	0	0	0	0	0	0	0	0	0	0	0	0	116	4423	199	0	136	3196	0	0
ASV_31	Bacteria	Actinobacteriota	Actinobacteria	Corynebacteriales	Mycobacteriaceae	Mycobacterium	unclassified_Mycobacterium	155	1431	0	338	0	0	0	0	832	562	555	1731	284	388	0	0	1548	0	0	0	0	0	0	0	0	153
ASV_32	Bacteria	Actinobacteriota	Thermoleophilia	Gaiellales	Gaiellaceae	Gaiella	unclassified_Gaiella	201	20	235	41	1146	119	434	682	381	0	0	0	0	0	694	657	162	741	1282	254	0	277	0	0	81	103
ASV_33	Bacteria	Actinobacteriota	Actinobacteria	Euzebyales	Euzebyaceae	unclassified_Euzebyaceae	unclassified_Euzebyaceae	0	0	0	0	0	0	0	0	0	0	0	0	0	0	0	0	0	0	92	0	6143	12	1045	0	0	0
ASV_34	Bacteria	Actinobacteriota	Rubrobacteria	Rubrobacterales	Rubrobacteriaceae	Rubrobacter	unclassified_Rubrobacter	27	41	50	57	35	0	415	219	0	0	0	0	0	0	106	0	15	62	222	684	1759	18	2670	742	0	0
ASV_35	Bacteria	Bacteroidota	Rhodothermia	Balneolales	Balneolaceae	unclassified_Balneolaceae	unclassified_Balneolaceae	0	0	0	0	0	0	0	0	0	0	0	0	0	0	0	0	0	0	0	0	34	0	7011	0	0	0
ASV_36	Bacteria	Cyanobacteria	Cyanobacteriia	Cyanobacteriales	Nostocaceae	Scytonema UTEX 2349	unclassified_Scytonema UTEX 2349	11	23	3231	616	0	0	1475	498	0	0	0	0	0	0	1052	97	0	13	0	0	0	0	0	0	14	0
ASV_37	Bacteria	Bacteroidota	Bacteroidia	Cytophagales	Microscillaceae	unclassified_Microscillaceae	unclassified_Microscillaceae	0	214	0	22	0	0	0	0	3314	386	468	1407	41	18	0	0	1083	0	0	0	0	0	0	0	0	0
ASV_38	Bacteria	Proteobacteria	Gammaproteobacteria	Nitrosococcales	Nitrosococcaceae	wb1-P19	unclassified_wb1-P19	0	0	12	0	115	0	164	1746	0	0	0	0	0	0	191	2323	0	1624	644	0	0	6	0	0	25	69
ASV_39	Bacteria	Proteobacteria	Gammaproteobacteria	Burkholderiales	Comamonadaceae	unclassified_Comamonadaceae	unclassified_Comamonadaceae	0	0	0	0	0	0	0	0	0	0	5886	749	53	0	0	0	0	0	0	0	0	0	0	0	0	0
ASV_40	Bacteria	Chloroflexi	KD4-96	unclassified_KD4-96	unclassified_KD4-96	unclassified_KD4-96	unclassified_KD4-96	0	0	0	0	0	0	0	0	0	0	0	0	0	0	0	0	0	0	0	60	521	0	5807	291	0	0
ASV_41	Bacteria	Bacteroidota	Bacteroidia	Chitinophagales	Chitinophagaceae	unclassified_Chitinophagaceae	unclassified_Chitinophagaceae	248	1319	0	3969	94	0	0	0	0	0	0	21	0	0	0	0	945	0	0	0	0	0	0	0	0	0
ASV_42	Archaea	Crenarchaeota	Nitrososphaeria	Nitrososphaerales	Nitrososphaeraceae	Candidatus Nitrocosmicus	unclassified_Candidatus Nitrocosmicus	29	0	372	13	84	138	549	683	46	0	0	0	0	0	478	533	46	1687	1222	226	0	365	0	76	32	0
ASV_43	Bacteria	Actinobacteriota	Actinobacteria	Corynebacteriales	Mycobacteriaceae	Mycobacterium	unclassified_Mycobacterium	0	112	0	0	0	0	0	0	2650	915	738	1387	288	188	0	0	241	0	0	0	0	0	0	0	0	0
ASV_44	Bacteria	Gemmatimonadota	Gemmatimonadetes	Gemmatimonadales	Gemmatimonadaceae	unclassified_Gemmatimonadaceae	unclassified_Gemmatimonadaceae	81	0	0	29	175	138	0	189	26	8	0	0	325	0	0	439	0	429	71	0	0	128	0	0	468	3867
ASV_45	Archaea	Crenarchaeota	Nitrososphaeria	Nitrososphaerales	Nitrososphaeraceae	unclassified_Nitrososphaeraceae	unclassified_Nitrososphaeraceae	130	0	126	12	221	102	242	484	13	0	0	0	0	0	1246	68	36	2230	790	13	0	424	0	84	40	100
ASV_46	Bacteria	Proteobacteria	Gammaproteobacteria	Nitrosococcales	Nitrosococcaceae	wb1-P19	unclassified_wb1-P19	161	0	0	0	297	0	444	110	0	0	0	5	0	0	2993	199	0	772	983	0	0	0	0	0	171	106
ASV_47	Bacteria	Proteobacteria	Gammaproteobacteria	Burkholderiales	Nitrosomonadaceae	Ellin6067	unclassified_Ellin6067	0	0	0	0	0	0	0	0	0	0	0	23	5655	338	0	0	0	0	0	0	0	0	0	0	20	158
ASV_48	Bacteria	Proteobacteria	Gammaproteobacteria	Xanthomonadales	Xanthomonadaceae	unclassified_Xanthomonadaceae	unclassified_Xanthomonadaceae	492	968	175	164	114	93	413	428	10	0	0	40	13	0	441	150	2166	285	132	0	0	78	0	0	11	0
ASV_49	Bacteria	Acidobacteriota	Blastocatellia	Blastocatellales	Blastocatellaceae	Blastocatella	unclassified_Blastocatella	30	0	31	59	83	71	163	260	0	0	0	0	0	0	64	585	37	4257	0	34	0	33	0	205	0	0
ASV_50	Bacteria	Actinobacteriota	Actinobacteria	Micrococcales	Microbacteriaceae	Galbitalea	unclassified_Galbitalea	0	226	0	0	0	0	0	0	2649	654	1063	1002	93	0	23	0	142	0	0	0	0	0	0	0	0	0
ASV_51	Bacteria	Verrucomicrobiota	Verrucomicrobiae	Chthoniobacterales	Chthoniobacteraceae	Chthoniobacter	unclassified_Chthoniobacter	535	361	301	217	742	399	672	275	16	0	0	40	0	0	299	69	604	230	241	110	71	558	0	69	0	40
ASV_52	Bacteria	Acidobacteriota	Blastocatellia	Blastocatellales	Blastocatellaceae	JGI 0001001-H03	unclassified_JGI 0001001-H03	66	154	0	0	0	0	0	0	2191	212	454	265	804	160	246	148	1136	0	0	0	0	0	0	0	0	0
ASV_53	Bacteria	Bacteroidota	Ignavibacteria	SJA-28	unclassified_SJA-28	unclassified_SJA-28	unclassified_SJA-28	62	196	0	264	0	0	0	0	2248	432	118	771	246	44	0	0	1390	0	0	0	0	0	0	0	0	0
ASV_54	Bacteria	Acidobacteriota	Blastocatellia	Blastocatellales	Blastocatellaceae	Blastocatella	unclassified_Blastocatella	208	475	200	639	308	115	636	299	0	10	0	72	0	0	390	272	198	420	525	288	0	78	0	636	0	0
ASV_55	Bacteria	Acidobacteriota	Vicinamibacteria	Vicinamibacterales	unclassified_Vicinamibacterales	unclassified_Vicinamibacterales	unclassified_Vicinamibacterales	27	8	73	0	199	0	178	296	0	0	0	0	0	0	70	0	0	270	278	717	507	489	130	1489	92	831
ASV_56	Bacteria	Proteobacteria	Gammaproteobacteria	Burkholderiales	Comamonadaceae	Rhizobacter	unclassified_Rhizobacter	238	496	52	441	43	0	196	0	181	21	1710	1323	137	225	107	61	197	0	37	0	0	34	0	0	22	124
ASV_57	Bacteria	Verrucomicrobiota	Verrucomicrobiae	Chthoniobacterales	Chthoniobacteraceae	Candidatus Udaeobacter	unclassified_Candidatus Udaeobacter	0	0	0	0	186	784	244	1006	0	0	0	0	0	0	312	0	31	1578	0	652	0	0	0	756	0	0
ASV_58	Bacteria	Actinobacteriota	Acidimicrobiia	Actinomarinales	unclassified_Actinomarinales	unclassified_Actinomarinales	unclassified_Actinomarinales	135	21	194	15	527	0	108	816	174	0	0	5	0	0	396	0	62	160	205	1912	0	0	0	624	59	26
ASV_59	Bacteria	Actinobacteriota	Actinobacteria	Micrococcales	Microbacteriaceae	Parafrigoribacterium	unclassified_Parafrigoribacterium	45	219	0	68	0	0	0	0	795	254	1190	1739	288	415	0	0	218	0	0	0	0	0	0	0	0	0
ASV_60	Bacteria	Cyanobacteria	Cyanobacteriia	Phormidesmiales	Phormidesmiaceae	Phormidesmis ANT.LACV5.1	unclassified_Phormidesmis ANT.LACV5.1	0	0	0	43	0	0	96	0	0	0	0	0	0	0	5059	23	0	8	0	0	0	0	0	0	0	0
ASV_61	Bacteria	Proteobacteria	Alphaproteobacteria	Sphingomonadales	Sphingomonadaceae	Rhizorhapis	unclassified_Rhizorhapis	0	0	0	0	0	0	0	0	4264	90	373	167	189	75	0	0	14	0	0	0	0	0	0	0	0	0
ASV_62	Bacteria	Actinobacteriota	Thermoleophilia	Gaiellales	unclassified_Gaiellales	unclassified_Gaiellales	unclassified_Gaiellales	23	0	0	16	121	0	23	0	187	9	0	14	77	0	380	561	42	128	821	0	0	1857	0	0	94	669
ASV_63	Bacteria	Proteobacteria	Gammaproteobacteria	Xanthomonadales	Xanthomonadaceae	Thermomonas	unclassified_Thermomonas	33	1728	0	503	0	0	0	0	19	22	0	33	59	84	0	0	2500	0	0	0	0	0	0	0	0	19
ASV_64	Bacteria	Verrucomicrobiota	Verrucomicrobiae	Chthoniobacterales	Chthoniobacteraceae	Candidatus Udaeobacter	unclassified_Candidatus Udaeobacter	67	0	110	74	627	182	516	672	0	0	0	0	0	0	315	117	309	1041	549	217	0	105	0	21	35	0
ASV_65	Bacteria	Cyanobacteria	Cyanobacteriia	Cyanobacteriales	Nostocaceae	Nostoc PCC-73102	unclassified_Nostoc PCC-73102	12	47	3734	293	17	0	458	34	0	0	0	0	0	0	153	20	0	20	0	132	0	0	24	0	0	0
ASV_66	Bacteria	Actinobacteriota	Thermoleophilia	Gaiellales	Gaiellaceae	Gaiella	unclassified_Gaiella	0	0	0	0	0	0	0	0	47	0	0	0	0	0	556	472	0	406	1515	0	0	1834	0	0	0	0
ASV_68	Bacteria	Proteobacteria	Alphaproteobacteria	Caulobacterales	Caulobacteraceae	Caulobacter	henricii	0	0	0	21	0	0	0	0	2745	499	351	1150	0	7	0	0	0	0	0	0	0	0	0	0	0	0
ASV_69	Bacteria	Actinobacteriota	Actinobacteria	Euzebyales	Euzebyaceae	unclassified_Euzebyaceae	unclassified_Euzebyaceae	15	0	0	33	0	0	54	0	0	0	0	0	0	0	0	0	0	0	29	224	1320	0	3071	0	0	0
ASV_70	Bacteria	Actinobacteriota	Actinobacteria	0319-7L14	unclassified_0319-7L14	unclassified_0319-7L14	unclassified_0319-7L14	106	17	86	33	593	154	390	788	120	6	0	5	0	0	276	355	102	379	121	310	0	287	0	8	79	319
ASV_71	Bacteria	Actinobacteriota	Actinobacteria	Pseudonocardiales	Pseudonocardiaceae	Crossiella	unclassified_Crossiella	0	0	0	0	0	68	0	594	0	0	0	0	0	0	614	1103	0	1404	559	0	0	176	0	0	0	0
ASV_72	Bacteria	Acidobacteriota	Blastocatellia	Blastocatellales	Blastocatellaceae	unclassified_Blastocatellaceae	unclassified_Blastocatellaceae	147	0	82	50	224	73	84	424	20	0	0	0	0	0	485	175	350	1238	299	418	0	245	0	76	15	59
ASV_73	Bacteria	Cyanobacteria	Cyanobacteriia	Cyanobacteriales	Nostocaceae	Nostoc PCC-73102	unclassified_Nostoc PCC-73102	18	70	3102	297	0	0	252	106	0	0	0	0	0	0	368	65	0	26	0	0	0	0	0	0	17	0
ASV_74	Bacteria	Acidobacteriota	Blastocatellia	Pyrinomonadales	Pyrinomonadaceae	RB41	unclassified_RB41	48	0	55	18	19	63	145	338	0	0	0	0	0	0	11	30	36	2862	62	0	0	610	0	0	0	0
ASV_75	Bacteria	Chloroflexi	Chloroflexia	Thermomicrobiales	JG30-KF-CM45	unclassified_JG30-KF-CM45	unclassified_JG30-KF-CM45	0	0	4	0	0	19	24	26	0	0	0	0	0	0	0	0	0	19	31	736	319	0	990	2088	0	0
ASV_76	Bacteria	Actinobacteriota	Actinobacteria	Euzebyales	Euzebyaceae	unclassified_Euzebyaceae	unclassified_Euzebyaceae	0	0	0	0	0	0	0	4	0	0	0	0	0	0	0	0	0	0	0	804	566	0	2474	365	0	0
ASV_77	Bacteria	Proteobacteria	Gammaproteobacteria	Pseudomonadales	Cellvibrionaceae	Cellvibrio	unclassified_Cellvibrio	2119	112	90	1487	105	163	0	46	0	0	0	42	17	0	0	0	23	0	0	0	0	0	0	0	0	0
ASV_78	Bacteria	Bacteroidota	Bacteroidia	Chitinophagales	Chitinophagaceae	unclassified_Chitinophagaceae	unclassified_Chitinophagaceae	79	0	27	159	469	0	138	173	0	0	0	0	0	0	352	2013	96	122	74	18	0	0	0	0	82	402
ASV_79	Bacteria	Gemmatimonadota	Gemmatimonadetes	Gemmatimonadales	Gemmatimonadaceae	Gemmatimonas	unclassified_Gemmatimonas	0	0	0	0	0	0	0	0	2331	517	599	736	0	0	0	0	0	0	0	0	0	0	0	0	0	0
ASV_80	Bacteria	Actinobacteriota	Thermoleophilia	Gaiellales	unclassified_Gaiellales	unclassified_Gaiellales	unclassified_Gaiellales	0	0	0	0	0	0	0	0	0	0	0	0	0	0	0	0	0	44	1465	0	0	2602	0	0	0	0
ASV_81	Bacteria	Actinobacteriota	Actinobacteria	Micrococcales	Intrasporangiaceae	unclassified_Intrasporangiaceae	unclassified_Intrasporangiaceae	258	34	173	96	417	613	243	81	0	0	0	17	0	0	1731	9	19	52	129	26	120	48	0	26	0	0
ASV_82	Bacteria	Cyanobacteria	Cyanobacteriia	Phormidesmiales	Phormidesmiaceae	Phormidesmis ANT.LACV5.1	unclassified_Phormidesmis ANT.LACV5.1	21	35	129	216	0	0	261	127	0	0	0	0	0	0	847	0	0	91	308	0	1955	64	24	0	0	0
ASV_83	Bacteria	Actinobacteriota	Actinobacteria	Corynebacteriales	Nocardiaceae	Rhodococcus	erythropolis	163	145	68	176	110	24	135	100	65	168	274	499	991	525	153	283	15	0	0	131	0	0	0	0	0	44
ASV_84	Bacteria	Chloroflexi	KD4-96	unclassified_KD4-96	unclassified_KD4-96	unclassified_KD4-96	unclassified_KD4-96	0	0	114	0	102	166	420	566	0	0	0	0	0	0	220	97	21	119	88	940	0	22	0	1185	0	0
ASV_85	Bacteria	Actinobacteriota	Rubrobacteria	Rubrobacterales	Rubrobacteriaceae	Rubrobacter	unclassified_Rubrobacter	0	0	91	32	226	241	123	215	5	0	0	0	0	0	400	0	0	39	284	1101	16	0	0	1280	0	4
ASV_86	Bacteria	Proteobacteria	Alphaproteobacteria	Caulobacterales	Caulobacteraceae	Brevundimonas	unclassified_Brevundimonas	131	169	381	272	195	56	90	18	1610	212	186	400	77	20	0	6	138	0	28	0	0	29	0	0	0	14
ASV_87	Bacteria	Bacteroidota	Bacteroidia	Chitinophagales	Chitinophagaceae	Aurantisolimonas	unclassified_Aurantisolimonas	0	1094	0	47	0	0	0	0	660	80	123	147	538	69	0	0	1243	0	0	0	0	0	0	0	0	18
ASV_88	Bacteria	Verrucomicrobiota	Verrucomicrobiae	Chthoniobacterales	Chthoniobacteraceae	Candidatus Udaeobacter	unclassified_Candidatus Udaeobacter	46	46	51	84	141	184	111	148	13	0	0	23	67	44	854	237	433	355	506	0	0	470	0	0	0	73
ASV_89	Bacteria	Actinobacteriota	Actinobacteria	Euzebyales	Euzebyaceae	unclassified_Euzebyaceae	unclassified_Euzebyaceae	0	0	0	0	0	0	0	0	0	0	0	0	0	0	0	0	0	0	0	90	118	0	3584	0	0	0
ASV_90	Bacteria	Acidobacteriota	Blastocatellia	Blastocatellales	Blastocatellaceae	JGI 0001001-H03	unclassified_JGI 0001001-H03	0	0	47	28	54	98	84	541	0	0	0	0	0	13	0	0	69	1088	202	834	168	351	95	81	0	31
ASV_91	Bacteria	Acidobacteriota	Blastocatellia	Blastocatellales	Blastocatellaceae	Blastocatella	unclassified_Blastocatella	157	194	154	241	149	294	241	313	16	0	0	59	0	0	0	303	793	791	0	0	0	0	0	0	0	0
ASV_92	Bacteria	Verrucomicrobiota	Verrucomicrobiae	Chthoniobacterales	Chthoniobacteraceae	Candidatus Udaeobacter	unclassified_Candidatus Udaeobacter	0	0	0	0	0	0	0	0	0	0	0	0	0	0	0	1526	0	2131	0	0	0	0	0	0	0	0
ASV_93	Bacteria	Acidobacteriota	Blastocatellia	Blastocatellales	Blastocatellaceae	OLB17	unclassified_OLB17	397	386	82	134	93	18	116	95	212	51	0	104	181	20	0	0	1510	90	42	39	0	0	0	39	13	0
ASV_94	Bacteria	Actinobacteriota	Actinobacteria	0319-7L14	unclassified_0319-7L14	unclassified_0319-7L14	unclassified_0319-7L14	35	0	49	7	689	45	210	572	19	0	0	0	0	0	245	461	18	331	61	513	0	70	0	149	21	84
ASV_95	Bacteria	Actinobacteriota	Actinobacteria	Micrococcales	Microbacteriaceae	Parafrigoribacterium	unclassified_Parafrigoribacterium	26	0	0	0	0	0	0	0	461	139	520	1088	229	1107	0	0	0	0	0	0	0	0	0	0	0	0
ASV_96	Bacteria	Verrucomicrobiota	Verrucomicrobiae	Chthoniobacterales	Terrimicrobiaceae	Terrimicrobium	unclassified_Terrimicrobium	6	26	0	17	0	0	0	0	1235	321	1166	676	21	0	0	0	71	0	0	0	0	0	0	0	0	0
ASV_97	Bacteria	Cyanobacteria	Cyanobacteriia	Cyanobacteriales	Phormidiaceae	Tychonema CCAP 1459-11B	unclassified_Tychonema CCAP 1459-11B	0	0	154	75	0	0	156	76	0	0	0	0	0	0	2871	42	0	32	0	0	0	125	0	0	0	0
ASV_98	Bacteria	Actinobacteriota	Rubrobacteria	Rubrobacterales	Rubrobacteriaceae	Rubrobacter	unclassified_Rubrobacter	0	13	93	0	125	122	217	447	25	0	0	0	0	0	0	280	35	1573	0	142	0	138	0	250	0	24
ASV_99	Bacteria	Actinobacteriota	Rubrobacteria	Rubrobacterales	Rubrobacteriaceae	Rubrobacter	unclassified_Rubrobacter	0	0	56	0	56	31	64	37	0	0	0	0	0	0	355	1934	18	284	202	0	0	370	0	43	0	0
ASV_100	Bacteria	Gemmatimonadota	S0134 terrestrial group	unclassified_S0134 terrestrial group	unclassified_S0134 terrestrial group	unclassified_S0134 terrestrial group	unclassified_S0134 terrestrial group	0	0	0	0	0	0	0	0	0	0	0	0	0	0	0	0	0	0	0	0	1748	0	1659	39	0	0
ASV_101	Bacteria	Proteobacteria	Gammaproteobacteria	Xanthomonadales	Xanthomonadaceae	Luteimonas	unclassified_Luteimonas	0	0	0	0	0	0	0	0	0	0	0	0	0	0	0	0	0	0	105	460	1171	45	1594	31	0	0
ASV_102	Bacteria	Deinococcota	Deinococci	Deinococcales	Trueperaceae	Truepera	unclassified_Truepera	0	0	0	0	0	0	17	0	0	0	0	5	0	0	5	0	0	0	11	127	1005	0	2200	0	0	0
ASV_103	Bacteria	Acidobacteriota	Blastocatellia	Blastocatellales	Blastocatellaceae	JGI 0001001-H03	unclassified_JGI 0001001-H03	276	143	0	0	0	142	0	136	0	0	0	0	53	53	73	80	1490	544	251	0	0	111	0	0	0	14
ASV_104	Bacteria	Gemmatimonadota	Longimicrobia	Longimicrobiales	Longimicrobiaceae	unclassified_Longimicrobiaceae	unclassified_Longimicrobiaceae	0	3	0	3	0	0	6	0	0	0	0	0	0	0	0	0	0	0	13	361	705	0	2251	0	0	0
ASV_105	Bacteria	Bacteroidota	Bacteroidia	Chitinophagales	Chitinophagaceae	unclassified_Chitinophagaceae	unclassified_Chitinophagaceae	305	89	0	450	423	103	122	39	0	0	0	0	97	45	0	499	597	140	0	0	0	52	0	0	0	307
ASV_106	Bacteria	Planctomycetota	vadinHA49	unclassified_vadinHA49	unclassified_vadinHA49	unclassified_vadinHA49	unclassified_vadinHA49	81	113	0	646	0	0	0	0	0	0	5	0	0	0	0	0	2387	0	0	0	0	0	0	0	0	0
ASV_107	Bacteria	Actinobacteriota	Thermoleophilia	Gaiellales	Gaiellaceae	Gaiella	unclassified_Gaiella	78	0	63	0	251	0	89	306	146	0	0	0	0	0	641	0	72	161	381	451	0	167	0	0	65	337
ASV_108	Bacteria	Proteobacteria	Gammaproteobacteria	Xanthomonadales	Xanthomonadaceae	Pseudoxanthomonas	unclassified_Pseudoxanthomonas	180	92	194	122	62	34	597	127	0	0	0	0	98	0	1072	0	17	68	286	39	109	73	31	0	0	0
ASV_109	Bacteria	Proteobacteria	Alphaproteobacteria	Sphingomonadales	Sphingomonadaceae	Sphingomonas	unclassified_Sphingomonas	133	68	86	121	53	30	99	37	13	9	0	221	63	18	0	81	1862	225	0	0	0	0	0	0	0	0
ASV_110	Archaea	Crenarchaeota	Nitrososphaeria	Nitrososphaerales	Nitrososphaeraceae	unclassified_Nitrososphaeraceae	unclassified_Nitrososphaeraceae	7	0	0	0	0	0	0	0	62	0	10	14	0	12	29	0	10	0	60	0	0	0	0	0	486	2425
ASV_111	Bacteria	Gemmatimonadota	Gemmatimonadetes	Gemmatimonadales	Gemmatimonadaceae	unclassified_Gemmatimonadaceae	unclassified_Gemmatimonadaceae	0	0	0	0	0	0	0	0	0	0	0	0	0	0	11	0	0	0	0	293	1912	0	659	224	0	0
ASV_112	Bacteria	Acidobacteriota	Vicinamibacteria	Vicinamibacterales	unclassified_Vicinamibacterales	unclassified_Vicinamibacterales	unclassified_Vicinamibacterales	0	0	0	0	0	0	67	184	0	0	0	0	0	0	0	0	0	157	120	916	346	0	0	1289	0	0
ASV_113	Bacteria	Verrucomicrobiota	Verrucomicrobiae	Chthoniobacterales	Chthoniobacteraceae	Candidatus Udaeobacter	unclassified_Candidatus Udaeobacter	0	0	0	0	0	0	0	254	26	0	0	0	0	0	0	0	0	743	273	990	135	0	0	640	0	0
ASV_114	Archaea	Crenarchaeota	Nitrososphaeria	Nitrososphaerales	Nitrososphaeraceae	unclassified_Nitrososphaeraceae	unclassified_Nitrososphaeraceae	0	0	0	0	0	0	0	0	0	0	0	0	52	0	0	0	0	0	26	0	0	0	0	0	204	2779
ASV_115	Archaea	Crenarchaeota	Nitrososphaeria	Nitrososphaerales	Nitrososphaeraceae	Candidatus Nitrocosmicus	unclassified_Candidatus Nitrocosmicus	45	12	81	26	18	177	40	650	154	0	0	0	17	0	16	149	70	328	446	0	0	622	0	0	33	174
ASV_116	Bacteria	Gemmatimonadota	AKAU4049	unclassified_AKAU4049	unclassified_AKAU4049	unclassified_AKAU4049	unclassified_AKAU4049	52	5	25	17	214	0	183	309	166	0	0	0	12	0	132	0	49	378	133	37	0	559	0	0	62	693
ASV_117	Bacteria	Actinobacteriota	Actinobacteria	Micrococcales	Micrococcaceae	Arthrobacter	agilis	1899	463	173	206	43	18	19	0	0	0	0	0	19	0	0	0	137	0	0	0	0	0	0	0	0	0
ASV_118	Archaea	Crenarchaeota	Nitrososphaeria	Nitrososphaerales	Nitrososphaeraceae	Candidatus Nitrocosmicus	unclassified_Candidatus Nitrocosmicus	0	0	91	0	0	110	276	729	43	0	0	0	0	0	0	199	0	1278	92	0	0	0	0	0	0	115
ASV_119	Bacteria	Actinobacteriota	Actinobacteria	Pseudonocardiales	Pseudonocardiaceae	Crossiella	unclassified_Crossiella	0	0	0	0	0	0	112	1165	0	0	0	0	0	0	199	0	0	548	193	332	199	0	0	173	0	0
ASV_120	Bacteria	Verrucomicrobiota	Verrucomicrobiae	Verrucomicrobiales	Verrucomicrobiaceae	Verrucomicrobium	unclassified_Verrucomicrobium	0	247	0	27	0	0	0	0	26	8	1309	217	70	26	0	0	962	0	0	0	0	0	0	0	0	16
ASV_121	Bacteria	Acidobacteriota	Blastocatellia	Blastocatellales	Blastocatellaceae	Blastocatella	unclassified_Blastocatella	822	569	76	162	94	0	45	0	0	0	0	81	0	0	0	40	993	0	0	0	0	0	0	0	0	0
ASV_122	Bacteria	Deinococcota	Deinococci	Deinococcales	Trueperaceae	Truepera	unclassified_Truepera	21	18	37	92	35	22	85	30	0	0	0	0	0	0	1659	122	0	13	30	317	0	0	120	251	0	0
ASV_123	Bacteria	Actinobacteriota	Actinobacteria	Frankiales	Geodermatophilaceae	Modestobacter	unclassified_Modestobacter	24	8	52	38	215	352	85	214	0	0	0	0	0	0	118	266	43	196	92	630	0	43	0	470	0	0
ASV_124	Bacteria	Actinobacteriota	Actinobacteria	Corynebacteriales	Mycobacteriaceae	Mycobacterium	unclassified_Mycobacterium	0	0	0	0	0	0	0	0	1489	146	926	278	0	0	0	0	0	0	0	0	0	0	0	0	0	0
ASV_125	Bacteria	Chloroflexi	Gitt-GS-136	unclassified_Gitt-GS-136	unclassified_Gitt-GS-136	unclassified_Gitt-GS-136	unclassified_Gitt-GS-136	54	16	77	16	140	0	100	172	99	0	0	0	0	0	112	0	0	51	327	703	278	0	220	216	93	160
ASV_126	Bacteria	Actinobacteriota	Thermoleophilia	Gaiellales	Gaiellaceae	Gaiella	unclassified_Gaiella	79	0	17	0	533	24	42	164	0	0	0	0	0	0	289	452	0	384	284	0	0	341	0	0	51	155
ASV_127	Bacteria	Acidobacteriota	Holophagae	Subgroup 7	unclassified_Subgroup 7	unclassified_Subgroup 7	unclassified_Subgroup 7	60	0	50	0	152	6	84	335	0	0	0	0	0	0	133	111	0	954	287	0	0	634	0	0	0	0
ASV_128	Bacteria	Proteobacteria	Alphaproteobacteria	Sphingomonadales	Sphingomonadaceae	Sphingomonas	echinoides	0	0	0	0	0	0	0	0	27	0	2582	197	0	0	0	0	0	0	0	0	0	0	0	0	0	0
ASV_129	Bacteria	Verrucomicrobiota	Verrucomicrobiae	Chthoniobacterales	Chthoniobacteraceae	Chthoniobacter	unclassified_Chthoniobacter	125	45	215	240	10	0	363	243	0	0	0	17	0	0	192	0	0	167	767	0	0	408	0	0	0	0
ASV_130	Bacteria	Bacteroidota	Bacteroidia	Cytophagales	MWH-CFBk5	unclassified_MWH-CFBk5	unclassified_MWH-CFBk5	23	0	0	27	0	0	48	6	0	0	0	0	0	0	0	0	0	0	410	46	1954	16	195	0	0	0
ASV_131	Bacteria	Actinobacteriota	Actinobacteria	Euzebyales	Euzebyaceae	unclassified_Euzebyaceae	unclassified_Euzebyaceae	61	17	45	16	91	41	53	97	119	0	0	0	5	0	0	0	137	0	0	829	0	0	0	1213	0	0
ASV_132	Bacteria	Bacteroidota	Bacteroidia	Chitinophagales	Chitinophagaceae	Segetibacter	unclassified_Segetibacter	354	687	0	0	0	0	0	0	46	0	0	159	42	72	0	0	1347	0	0	0	0	0	0	0	0	0
ASV_133	Bacteria	Bacteroidota	Bacteroidia	Chitinophagales	Chitinophagaceae	unclassified_Chitinophagaceae	unclassified_Chitinophagaceae	328	323	0	345	223	74	0	0	0	0	0	0	0	0	459	344	572	0	0	0	0	26	0	0	0	0
ASV_134	Bacteria	Actinobacteriota	MB-A2-108	unclassified_MB-A2-108	unclassified_MB-A2-108	unclassified_MB-A2-108	unclassified_MB-A2-108	0	0	0	9	0	0	0	0	0	0	0	0	0	0	0	920	0	34	10	0	0	1720	0	0	0	0
ASV_135	Bacteria	Actinobacteriota	MB-A2-108	unclassified_MB-A2-108	unclassified_MB-A2-108	unclassified_MB-A2-108	unclassified_MB-A2-108	23	8	0	0	85	0	21	26	103	0	0	6	19	0	107	203	35	142	502	0	0	303	0	0	30	1062
ASV_136	Bacteria	Proteobacteria	Gammaproteobacteria	Burkholderiales	Oxalobacteraceae	Undibacterium	unclassified_Undibacterium	0	0	0	0	0	0	0	0	0	0	2523	59	33	24	0	0	0	0	0	0	0	0	0	0	0	0
ASV_137	Bacteria	Actinobacteriota	Actinobacteria	Nitriliruptorales	Nitriliruptoraceae	unclassified_Nitriliruptoraceae	unclassified_Nitriliruptoraceae	0	0	0	0	2	0	0	0	0	0	0	0	0	0	0	0	0	0	0	13	793	0	1799	0	0	0
ASV_138	Bacteria	Proteobacteria	Gammaproteobacteria	Burkholderiales	Oxalobacteraceae	Actimicrobium	unclassified_Actimicrobium	0	45	0	0	0	0	0	0	0	0	2226	334	0	0	0	0	0	0	0	0	0	0	0	0	0	0
ASV_139	Bacteria	Acidobacteriota	Holophagae	Subgroup 7	unclassified_Subgroup 7	unclassified_Subgroup 7	unclassified_Subgroup 7	0	0	0	0	0	0	0	0	0	0	6	0	30	0	0	0	0	0	31	0	0	465	0	0	146	1914
ASV_140	Bacteria	Proteobacteria	Gammaproteobacteria	Burkholderiales	Comamonadaceae	Piscinibacter	unclassified_Piscinibacter	156	342	108	330	130	86	150	150	0	0	0	0	0	0	177	165	402	189	72	73	0	0	0	42	0	0
ASV_141	Bacteria	Acidobacteriota	Vicinamibacteria	Vicinamibacterales	unclassified_Vicinamibacterales	unclassified_Vicinamibacterales	unclassified_Vicinamibacterales	38	0	23	0	71	0	29	0	15	5	0	0	0	0	0	0	0	144	137	0	0	439	0	0	217	1446
ASV_142	Bacteria	Cyanobacteria	Vampirivibrionia	Obscuribacterales	Obscuribacteraceae	unclassified_Obscuribacteraceae	unclassified_Obscuribacteraceae	0	44	0	20	0	0	0	0	564	122	703	813	55	22	0	0	161	0	0	0	0	0	0	0	0	5
ASV_143	Bacteria	Proteobacteria	Gammaproteobacteria	Burkholderiales	SC-I-84	unclassified_SC-I-84	unclassified_SC-I-84	0	0	0	0	0	0	0	0	0	0	0	0	18	0	0	0	0	0	0	0	0	21	0	0	35	2435
ASV_144	Bacteria	Proteobacteria	Gammaproteobacteria	Burkholderiales	Comamonadaceae	unclassified_Comamonadaceae	unclassified_Comamonadaceae	162	133	94	249	119	0	0	0	877	369	0	218	0	0	0	0	284	0	0	0	0	0	0	0	0	0
ASV_145	Bacteria	Actinobacteriota	Actinobacteria	Euzebyales	Euzebyaceae	unclassified_Euzebyaceae	unclassified_Euzebyaceae	0	0	0	0	20	36	36	59	11	0	0	0	0	0	87	0	0	0	17	778	153	0	637	667	0	3
ASV_146	Bacteria	Gemmatimonadota	Gemmatimonadetes	Gemmatimonadales	Gemmatimonadaceae	unclassified_Gemmatimonadaceae	unclassified_Gemmatimonadaceae	9	0	3	0	26	0	0	0	7	0	0	0	0	0	45	0	0	0	133	0	0	30	0	0	118	2120
ASV_147	Bacteria	Chloroflexi	Chloroflexia	Thermomicrobiales	AKYG1722	unclassified_AKYG1722	unclassified_AKYG1722	0	0	0	0	0	0	0	0	0	0	0	0	0	0	0	0	0	0	0	542	131	0	1162	636	0	0
ASV_148	Bacteria	Actinobacteriota	Thermoleophilia	Gaiellales	Gaiellaceae	Gaiella	unclassified_Gaiella	0	0	61	0	241	0	73	150	125	25	0	0	169	0	0	0	0	0	149	0	0	0	0	0	114	1337
ASV_149	Bacteria	Bacteroidota	Bacteroidia	Chitinophagales	Chitinophagaceae	Flavisolibacter	rigui	168	0	82	9	538	137	108	394	0	0	0	0	0	0	143	0	0	318	272	7	0	222	0	0	41	0
ASV_150	Bacteria	Bacteroidota	Bacteroidia	Cytophagales	Cyclobacteriaceae	unclassified_Cyclobacteriaceae	unclassified_Cyclobacteriaceae	5	0	0	6	0	0	0	0	0	0	0	0	0	0	87	0	0	5	157	352	626	0	1201	0	0	0
ASV_151	Bacteria	Proteobacteria	Gammaproteobacteria	Burkholderiales	Comamonadaceae	Variovorax	unclassified_Variovorax	52	327	0	107	0	0	0	0	427	0	610	689	22	0	0	0	200	0	0	0	0	0	0	0	0	0
ASV_152	Bacteria	Gemmatimonadota	Gemmatimonadetes	Gemmatimonadales	Gemmatimonadaceae	unclassified_Gemmatimonadaceae	unclassified_Gemmatimonadaceae	0	23	0	29	0	0	0	0	55	6	6	113	1304	787	0	0	111	0	0	0	0	0	0	0	0	0
ASV_153	Bacteria	Bacteroidota	Bacteroidia	Chitinophagales	Chitinophagaceae	Ferruginibacter	unclassified_Ferruginibacter	397	265	57	551	157	65	73	18	0	0	21	0	179	24	67	136	409	0	0	0	0	12	0	0	0	0
ASV_154	Bacteria	Actinobacteriota	MB-A2-108	unclassified_MB-A2-108	unclassified_MB-A2-108	unclassified_MB-A2-108	unclassified_MB-A2-108	24	6	7	21	224	30	154	376	39	0	0	0	0	0	391	52	35	229	159	354	0	280	0	0	4	11
ASV_155	Bacteria	Acidobacteriota	Vicinamibacteria	Vicinamibacterales	Vicinamibacteraceae	unclassified_Vicinamibacteraceae	unclassified_Vicinamibacteraceae	0	0	0	0	0	0	14	51	0	0	0	0	0	0	0	0	0	81	249	608	765	5	74	546	0	0
ASV_156	Bacteria	Verrucomicrobiota	Verrucomicrobiae	Chthoniobacterales	Chthoniobacteraceae	Candidatus Udaeobacter	unclassified_Candidatus Udaeobacter	229	20	53	68	579	203	339	83	0	0	0	0	0	0	397	337	30	30	0	0	0	0	0	0	0	0
ASV_157	Bacteria	Acidobacteriota	Blastocatellia	Pyrinomonadales	Pyrinomonadaceae	RB41	unclassified_RB41	27	0	0	23	0	34	0	221	0	0	0	0	0	0	0	694	32	1177	0	0	0	138	0	0	0	0
ASV_158	Bacteria	Proteobacteria	Gammaproteobacteria	Burkholderiales	Oxalobacteraceae	unclassified_Oxalobacteraceae	unclassified_Oxalobacteraceae	0	90	0	254	0	0	0	0	23	21	577	374	104	148	0	0	740	0	0	0	0	0	0	0	0	0
ASV_159	Bacteria	Actinobacteriota	Thermoleophilia	Solirubrobacterales	67-14	unclassified_67-14	unclassified_67-14	0	0	0	0	89	40	54	118	57	0	0	0	0	0	191	112	34	33	78	896	0	0	0	601	0	26
ASV_160	Bacteria	Actinobacteriota	Actinobacteria	Propionibacteriales	Nocardioidaceae	Nocardioides	unclassified_Nocardioides	0	28	0	0	0	0	0	0	1327	487	17	457	0	0	0	0	0	0	0	0	0	0	0	0	0	0
ASV_161	Bacteria	Acidobacteriota	Blastocatellia	Pyrinomonadales	Pyrinomonadaceae	RB41	unclassified_RB41	0	0	0	0	0	25	17	216	0	0	0	0	46	0	90	505	0	0	80	0	0	313	0	0	36	988
ASV_162	Bacteria	Gemmatimonadota	Longimicrobia	Longimicrobiales	Longimicrobiaceae	YC-ZSS-LKJ147	unclassified_YC-ZSS-LKJ147	0	0	0	0	11	20	0	32	0	0	0	0	0	0	39	0	0	35	29	567	607	0	393	561	0	0
ASV_163	Bacteria	Actinobacteriota	Rubrobacteria	Rubrobacterales	Rubrobacteriaceae	Rubrobacter	unclassified_Rubrobacter	8	10	27	24	26	51	95	247	0	0	0	0	0	0	189	594	16	799	21	0	0	160	0	0	0	0
ASV_164	Bacteria	Chloroflexi	Anaerolineae	SBR1031	A4b	unclassified_A4b	unclassified_A4b	8	0	181	0	24	29	300	962	0	0	0	0	0	0	25	0	0	106	556	0	12	52	0	4	4	0
ASV_165	Bacteria	Bacteroidota	Bacteroidia	Flavobacteriales	Flavobacteriaceae	Planktosalinus	unclassified_Planktosalinus	0	0	0	0	0	0	0	0	0	0	0	0	0	0	0	0	0	0	0	0	2225	0	38	0	0	0
ASV_166	Bacteria	Proteobacteria	Gammaproteobacteria	Burkholderiales	Comamonadaceae	Variovorax	boronicumulans	90	75	364	55	183	63	201	76	284	254	100	378	0	0	73	28	0	25	0	0	0	0	0	0	0	0
ASV_167	Bacteria	Proteobacteria	Alphaproteobacteria	Caulobacterales	Caulobacteraceae	Caulobacter	unclassified_Caulobacter	0	0	0	0	0	0	0	0	447	85	1426	255	0	0	0	0	29	0	0	0	0	0	0	0	0	0
ASV_168	Bacteria	Actinobacteriota	Actinobacteria	Frankiales	unclassified_Frankiales	unclassified_Frankiales	unclassified_Frankiales	151	98	72	68	126	93	202	93	0	0	0	0	0	0	530	68	99	56	117	133	58	0	45	224	0	0
ASV_169	Bacteria	Proteobacteria	Gammaproteobacteria	Xanthomonadales	Xanthomonadaceae	Arenimonas	oryziterrae	0	0	0	0	0	0	0	0	134	12	331	1136	599	18	0	0	0	0	0	0	0	0	0	0	0	0
ASV_170	Bacteria	Proteobacteria	Gammaproteobacteria	Xanthomonadales	Xanthomonadaceae	Luteimonas	unclassified_Luteimonas	0	0	0	0	0	0	0	0	0	0	0	0	0	0	152	0	0	0	344	219	873	58	545	0	0	0
ASV_171	Bacteria	Bacteroidota	Bacteroidia	Chitinophagales	Chitinophagaceae	unclassified_Chitinophagaceae	unclassified_Chitinophagaceae	0	0	0	0	265	0	142	191	0	0	0	0	0	0	178	0	0	192	488	223	0	290	0	219	0	0
ASV_172	Bacteria	Verrucomicrobiota	Verrucomicrobiae	Chthoniobacterales	unclassified_Chthoniobacterales	unclassified_Chthoniobacterales	unclassified_Chthoniobacterales	32	0	36	0	368	17	126	293	0	0	0	0	0	0	345	0	0	19	193	578	126	0	0	0	41	0
ASV_173	Bacteria	Proteobacteria	Gammaproteobacteria	Burkholderiales	Oxalobacteraceae	Massilia	timonae	171	164	151	513	80	23	98	32	0	0	101	66	458	0	101	44	117	21	0	0	0	8	0	7	0	0
ASV_174	Bacteria	Actinobacteriota	Rubrobacteria	Rubrobacterales	Rubrobacteriaceae	Rubrobacter	unclassified_Rubrobacter	64	0	64	22	101	272	101	456	0	0	0	0	0	0	0	126	19	495	0	92	0	51	0	290	0	0
ASV_175	Bacteria	Verrucomicrobiota	Verrucomicrobiae	Chthoniobacterales	Chthoniobacteraceae	Candidatus Udaeobacter	unclassified_Candidatus Udaeobacter	0	0	0	0	0	0	123	251	0	0	0	0	0	0	0	1445	0	194	0	134	0	0	0	0	0	0
ASV_176	Bacteria	Proteobacteria	Alphaproteobacteria	Sphingomonadales	Sphingomonadaceae	Novosphingobium	unclassified_Novosphingobium	254	380	29	941	273	0	0	0	0	0	0	0	18	0	23	51	167	0	0	0	0	0	0	0	0	0
ASV_177	Bacteria	Actinobacteriota	Actinobacteria	Micrococcales	Microbacteriaceae	unclassified_Microbacteriaceae	unclassified_Microbacteriaceae	181	140	0	96	60	60	0	0	332	98	229	331	335	152	0	0	118	0	0	0	0	0	0	0	0	0
ASV_178	Bacteria	Chloroflexi	Gitt-GS-136	unclassified_Gitt-GS-136	unclassified_Gitt-GS-136	unclassified_Gitt-GS-136	unclassified_Gitt-GS-136	0	0	41	0	167	0	50	96	0	0	0	13	37	0	149	84	59	14	0	299	72	0	246	716	0	77
ASV_179	Bacteria	Gemmatimonadota	Gemmatimonadetes	Gemmatimonadales	Gemmatimonadaceae	unclassified_Gemmatimonadaceae	unclassified_Gemmatimonadaceae	0	0	78	0	232	0	37	0	0	0	0	0	0	0	106	0	0	78	82	714	323	90	0	379	0	0
ASV_180	Bacteria	Bacteroidota	Bacteroidia	Cytophagales	MWH-CFBk5	unclassified_MWH-CFBk5	unclassified_MWH-CFBk5	0	0	0	0	0	0	0	0	0	0	0	0	0	0	0	0	0	0	0	115	461	0	1407	136	0	0
ASV_181	Bacteria	Deinococcota	Deinococci	Deinococcales	Deinococcaceae	Deinococcus	marmoris	100	60	117	594	474	40	235	17	0	0	0	6	56	0	30	371	5	0	0	0	0	0	0	0	3	0
ASV_182	Bacteria	Actinobacteriota	Rubrobacteria	Rubrobacterales	Rubrobacteriaceae	Rubrobacter	unclassified_Rubrobacter	0	0	0	0	0	0	0	0	0	0	0	0	0	0	0	0	17	0	0	32	0	0	0	2057	0	0
ASV_183	Bacteria	Verrucomicrobiota	Verrucomicrobiae	Chthoniobacterales	Chthoniobacteraceae	unclassified_Chthoniobacteraceae	unclassified_Chthoniobacteraceae	0	0	0	0	0	0	0	0	0	0	0	0	0	0	0	0	0	0	0	0	1497	0	0	597	0	0
ASV_184	Bacteria	Planctomycetota	vadinHA49	unclassified_vadinHA49	unclassified_vadinHA49	unclassified_vadinHA49	unclassified_vadinHA49	0	56	0	668	0	0	0	0	0	25	0	35	0	0	0	224	1085	0	0	0	0	0	0	0	0	0
ASV_185	Bacteria	Planctomycetota	vadinHA49	unclassified_vadinHA49	unclassified_vadinHA49	unclassified_vadinHA49	unclassified_vadinHA49	0	1193	0	0	0	0	0	0	0	0	0	0	0	0	57	0	801	0	0	0	0	0	0	0	0	0
ASV_186	Bacteria	Bacteroidota	Bacteroidia	Chitinophagales	Chitinophagaceae	Aurantisolimonas	haloimpatiens	476	217	13	151	19	0	25	0	0	0	0	46	0	0	74	0	1016	0	0	0	0	0	0	0	0	0
ASV_187	Bacteria	Actinobacteriota	Thermoleophilia	Solirubrobacterales	Solirubrobacteraceae	Conexibacter	unclassified_Conexibacter	0	0	0	0	0	0	0	0	0	0	0	0	0	0	0	0	0	18	0	1179	53	0	208	570	0	0
ASV_188	Bacteria	Actinobacteriota	Thermoleophilia	Solirubrobacterales	Solirubrobacteraceae	unclassified_Solirubrobacteraceae	unclassified_Solirubrobacteraceae	0	0	0	0	0	0	0	0	0	0	0	0	0	0	168	477	0	0	0	807	0	0	0	570	0	0
ASV_189	Bacteria	Gemmatimonadota	Longimicrobia	Longimicrobiales	Longimicrobiaceae	unclassified_Longimicrobiaceae	unclassified_Longimicrobiaceae	0	0	0	0	0	0	0	0	0	0	0	0	0	0	0	0	0	0	0	0	0	0	2015	0	0	0
ASV_190	Bacteria	Bacteroidota	Bacteroidia	Chitinophagales	Chitinophagaceae	unclassified_Chitinophagaceae	unclassified_Chitinophagaceae	62	258	0	435	34	0	0	0	0	0	0	0	0	0	0	0	1199	0	0	0	0	0	0	0	0	0
ASV_191	Bacteria	Proteobacteria	Gammaproteobacteria	Burkholderiales	Oxalobacteraceae	Massilia	unclassified_Massilia	0	76	0	480	0	0	0	0	0	0	0	0	1203	219	0	0	0	0	0	0	0	0	0	0	0	0
ASV_192	Bacteria	Proteobacteria	Alphaproteobacteria	Rhizobiales	Methyloligellaceae	Methyloceanibacter	unclassified_Methyloceanibacter	38	0	155	0	738	0	74	71	92	0	0	0	0	0	280	0	20	0	335	13	5	0	0	0	12	142
ASV_193	Bacteria	Acidobacteriota	Blastocatellia	Pyrinomonadales	Pyrinomonadaceae	RB41	unclassified_RB41	70	0	107	0	243	0	27	234	73	0	0	0	0	0	87	227	21	247	91	339	0	168	0	0	19	14
ASV_194	Bacteria	Proteobacteria	Gammaproteobacteria	Burkholderiales	SC-I-84	unclassified_SC-I-84	unclassified_SC-I-84	0	0	12	0	104	13	68	307	0	0	0	0	0	0	524	311	0	240	67	146	0	0	0	56	0	118
ASV_195	Bacteria	Bacteroidota	Bacteroidia	Sphingobacteriales	env.OPS 17	unclassified_env.OPS 17	unclassified_env.OPS 17	0	8	0	0	0	0	0	0	993	27	716	159	5	0	0	0	39	0	0	0	0	0	0	0	0	0
ASV_196	Bacteria	Proteobacteria	Gammaproteobacteria	Pseudomonadales	Cellvibrionaceae	Cellvibrio	unclassified_Cellvibrio	178	281	15	319	43	0	0	0	0	0	0	19	960	0	0	0	99	0	0	0	0	0	0	0	0	0
ASV_197	Bacteria	Actinobacteriota	Rubrobacteria	Rubrobacterales	Rubrobacteriaceae	Rubrobacter	unclassified_Rubrobacter	0	0	0	0	0	0	0	0	0	0	0	0	0	0	0	0	0	0	0	0	0	0	0	1911	0	0
ASV_198	Bacteria	Acidobacteriota	Holophagae	Subgroup 7	unclassified_Subgroup 7	unclassified_Subgroup 7	unclassified_Subgroup 7	0	0	0	0	105	0	0	0	0	0	0	10	14	0	113	94	0	0	326	0	0	208	0	0	0	1040
ASV_199	Bacteria	Acidobacteriota	Blastocatellia	Blastocatellales	Blastocatellaceae	Blastocatella	unclassified_Blastocatella	0	0	0	0	112	256	119	983	0	0	0	0	0	0	0	102	0	241	0	0	0	0	0	90	0	0
ASV_200	Bacteria	Actinobacteriota	Actinobacteria	Micrococcales	Microbacteriaceae	Marisediminicola	unclassified_Marisediminicola	592	129	91	298	601	160	0	0	0	0	0	0	0	0	0	0	0	0	0	0	0	0	0	0	23	0
ASV_201	Bacteria	Bacteroidota	Bacteroidia	Chitinophagales	Chitinophagaceae	Ferruginibacter	unclassified_Ferruginibacter	0	183	0	75	0	0	0	0	420	38	600	170	0	0	0	0	404	0	0	0	0	0	0	0	0	0
ASV_202	Bacteria	Cyanobacteria	Cyanobacteriia	Phormidesmiales	Phormidesmiaceae	Phormidesmis ANT.LACV5.1	unclassified_Phormidesmis ANT.LACV5.1	67	0	35	119	0	0	75	0	0	0	0	0	0	0	0	0	0	40	1051	0	24	398	57	19	0	0
ASV_203	Bacteria	Proteobacteria	Gammaproteobacteria	Burkholderiales	Comamonadaceae	unclassified_Comamonadaceae	unclassified_Comamonadaceae	49	446	37	101	99	0	81	0	153	0	287	151	0	0	0	0	477	0	0	0	0	0	0	0	0	0
ASV_204	Bacteria	Proteobacteria	Gammaproteobacteria	Burkholderiales	Comamonadaceae	Rhodoferax	unclassified_Rhodoferax	0	0	0	0	0	0	0	0	0	0	1693	181	0	0	0	0	0	0	0	0	0	0	0	0	0	0
ASV_205	Bacteria	Bacteroidota	Ignavibacteria	SJA-28	unclassified_SJA-28	unclassified_SJA-28	unclassified_SJA-28	200	0	42	0	439	74	60	280	10	0	0	0	0	0	0	90	17	467	84	0	0	0	0	0	47	22
ASV_206	Bacteria	Chloroflexi	Chloroflexia	Thermomicrobiales	JG30-KF-CM45	unclassified_JG30-KF-CM45	unclassified_JG30-KF-CM45	0	0	0	0	43	19	37	57	0	0	0	0	0	0	61	0	0	28	73	332	211	0	369	585	0	0
ASV_207	Bacteria	Actinobacteriota	Rubrobacteria	Rubrobacterales	Rubrobacteriaceae	Rubrobacter	unclassified_Rubrobacter	13	0	196	41	75	224	183	273	0	0	0	0	0	0	65	0	33	272	141	131	0	0	0	145	0	0
ASV_208	Bacteria	Actinobacteriota	Thermoleophilia	Solirubrobacterales	67-14	unclassified_67-14	unclassified_67-14	50	0	94	0	0	0	0	0	0	0	0	0	0	0	0	0	0	0	0	468	45	0	18	1116	0	0
ASV_209	Bacteria	Actinobacteriota	Thermoleophilia	Solirubrobacterales	67-14	unclassified_67-14	unclassified_67-14	0	0	0	0	32	0	52	133	0	0	0	0	0	0	0	0	0	18	0	937	0	0	0	614	0	0
ASV_210	Bacteria	Acidobacteriota	Vicinamibacteria	Vicinamibacterales	unclassified_Vicinamibacterales	unclassified_Vicinamibacterales	unclassified_Vicinamibacterales	0	0	40	13	0	0	0	0	0	0	0	0	0	0	113	0	0	0	0	73	262	0	1254	25	0	0
ASV_211	Bacteria	Actinobacteriota	Rubrobacteria	Rubrobacterales	Rubrobacteriaceae	Rubrobacter	unclassified_Rubrobacter	0	0	28	27	39	42	67	55	0	0	0	0	0	0	25	0	0	0	20	1255	44	0	21	155	0	0
ASV_212	Bacteria	Cyanobacteria	Cyanobacteriia	Cyanobacteriales	Nostocaceae	Nodularia PCC-9350	spumigena	0	0	0	0	0	0	8	0	0	0	0	0	0	0	0	0	0	0	0	0	1769	0	0	0	0	0
ASV_213	Bacteria	Bacteroidota	Bacteroidia	Chitinophagales	Chitinophagaceae	Terrimonas	unclassified_Terrimonas	13	446	0	0	0	0	0	0	0	4	0	0	0	0	0	0	1295	0	0	0	0	0	0	0	0	0
ASV_214	Bacteria	Proteobacteria	Alphaproteobacteria	Sphingomonadales	Sphingomonadaceae	Sphingobium	unclassified_Sphingobium	0	0	0	0	0	0	0	0	126	0	1298	332	0	0	0	0	0	0	0	0	0	0	0	0	0	0
ASV_215	Bacteria	Planctomycetota	Planctomycetes	Isosphaerales	Isosphaeraceae	unclassified_Isosphaeraceae	unclassified_Isosphaeraceae	0	0	0	0	0	0	0	0	0	0	0	0	0	0	0	0	0	0	0	63	434	0	1224	35	0	0
ASV_216	Bacteria	Acidobacteriota	Blastocatellia	Blastocatellales	Blastocatellaceae	Blastocatella	unclassified_Blastocatella	0	0	456	0	61	67	39	44	0	0	0	0	0	0	82	0	754	109	81	0	0	30	0	0	8	9
ASV_217	Bacteria	Actinobacteriota	Thermoleophilia	Solirubrobacterales	Solirubrobacteraceae	unclassified_Solirubrobacteraceae	unclassified_Solirubrobacteraceae	0	0	0	0	0	0	0	71	0	0	0	0	0	0	209	95	0	0	35	253	0	0	0	1036	0	38
ASV_218	Bacteria	Bacteroidota	Bacteroidia	Chitinophagales	Chitinophagaceae	Ferruginibacter	unclassified_Ferruginibacter	0	0	0	0	0	0	0	0	0	9	100	434	738	286	0	0	116	0	0	0	0	0	0	0	0	48
ASV_219	Bacteria	Acidobacteriota	Blastocatellia	Blastocatellales	Blastocatellaceae	unclassified_Blastocatellaceae	unclassified_Blastocatellaceae	0	0	0	0	0	0	0	0	0	0	0	0	0	0	0	0	0	0	0	131	695	0	245	652	0	0
ASV_220	Bacteria	Proteobacteria	Gammaproteobacteria	Burkholderiales	Oxalobacteraceae	unclassified_Oxalobacteraceae	unclassified_Oxalobacteraceae	957	0	0	0	0	0	0	0	0	0	541	0	159	0	0	0	28	0	0	0	0	0	0	0	0	36
ASV_221	Bacteria	Cyanobacteria	Cyanobacteriia	Leptolyngbyales	Leptolyngbyaceae	Phormidium SAG 37.90	unclassified_Phormidium SAG 37.90	0	0	102	21	0	0	76	51	0	0	0	0	0	0	1143	0	0	0	210	0	0	74	0	0	0	0
ASV_222	Bacteria	Bacteroidota	Bacteroidia	Chitinophagales	Chitinophagaceae	Flavisolibacter	unclassified_Flavisolibacter	0	0	0	0	0	0	0	0	0	0	0	0	0	0	0	0	0	0	0	68	319	0	0	1286	0	0
ASV_223	Bacteria	Actinobacteriota	Thermoleophilia	Solirubrobacterales	Solirubrobacteraceae	unclassified_Solirubrobacteraceae	unclassified_Solirubrobacteraceae	21	0	23	28	86	38	79	53	0	0	0	0	0	0	75	374	0	39	77	327	0	0	0	375	0	72
ASV_224	Bacteria	Proteobacteria	Alphaproteobacteria	Rhizobiales	Xanthobacteraceae	Rhodopseudomonas	unclassified_Rhodopseudomonas	0	87	0	124	0	0	0	0	63	73	753	332	0	0	0	0	235	0	0	0	0	0	0	0	0	0
ASV_225	Bacteria	Proteobacteria	Alphaproteobacteria	Sphingomonadales	Sphingomonadaceae	Sphingomonas	unclassified_Sphingomonas	0	51	0	43	0	0	0	0	0	0	0	0	1313	259	0	0	0	0	0	0	0	0	0	0	0	0
ASV_226	Bacteria	Acidobacteriota	Holophagae	Subgroup 7	unclassified_Subgroup 7	unclassified_Subgroup 7	unclassified_Subgroup 7	0	0	0	0	0	0	0	0	0	0	0	0	0	0	0	0	0	0	148	0	0	0	0	0	135	1382
ASV_227	Bacteria	Verrucomicrobiota	Verrucomicrobiae	Chthoniobacterales	unclassified_Chthoniobacterales	unclassified_Chthoniobacterales	unclassified_Chthoniobacterales	0	0	0	0	0	0	0	0	0	0	0	0	0	0	0	0	0	0	0	40	667	0	950	0	0	0
ASV_228	Bacteria	Actinobacteriota	Actinobacteria	Propionibacteriales	Nocardioidaceae	Marmoricola	unclassified_Marmoricola	228	226	0	369	0	0	0	0	0	0	0	49	0	0	0	0	784	0	0	0	0	0	0	0	0	0
ASV_229	Bacteria	Actinobacteriota	Acidimicrobiia	unclassified_Acidimicrobiia	unclassified_Acidimicrobiia	unclassified_Acidimicrobiia	unclassified_Acidimicrobiia	0	0	0	0	0	0	0	60	0	0	0	0	0	0	0	0	0	34	0	928	229	0	148	255	0	0
ASV_230	Bacteria	Actinobacteriota	Thermoleophilia	Solirubrobacterales	67-14	unclassified_67-14	unclassified_67-14	0	0	0	0	0	0	0	0	0	0	0	0	0	0	0	0	0	0	0	620	0	0	0	1019	0	0
ASV_231	Bacteria	Deinococcota	Deinococci	Deinococcales	Trueperaceae	Truepera	unclassified_Truepera	31	0	35	148	0	29	113	92	9	2	0	0	0	0	226	0	13	51	67	41	0	0	0	768	0	0
ASV_232	Bacteria	Verrucomicrobiota	Verrucomicrobiae	Chthoniobacterales	Chthoniobacteraceae	Candidatus Udaeobacter	unclassified_Candidatus Udaeobacter	0	0	0	0	95	37	71	326	0	0	0	0	0	0	0	0	0	42	42	838	0	0	0	174	0	0
ASV_233	Bacteria	Proteobacteria	Alphaproteobacteria	Sphingomonadales	Sphingomonadaceae	Sphingobium	unclassified_Sphingobium	0	0	0	0	0	0	0	0	89	0	1261	268	0	0	0	0	0	0	0	0	0	0	0	0	0	0
ASV_234	Bacteria	Cyanobacteria	Cyanobacteriia	Cyanobacteriales	Nostocaceae	Nostoc PCC-73102	commune	0	14	1154	143	0	0	153	0	0	0	0	0	0	0	43	50	0	0	0	39	0	0	19	0	0	0
ASV_235	Bacteria	Acidobacteriota	Blastocatellia	Pyrinomonadales	Pyrinomonadaceae	RB41	unclassified_RB41	21	0	36	0	101	71	279	693	0	0	0	0	0	0	0	0	30	306	0	0	0	71	0	0	0	0
ASV_236	Bacteria	Actinobacteriota	Thermoleophilia	Solirubrobacterales	67-14	unclassified_67-14	unclassified_67-14	0	0	0	0	0	0	0	29	0	0	0	0	0	0	0	0	0	0	0	766	0	0	0	798	0	0
ASV_237	Bacteria	Cyanobacteria	Cyanobacteriia	Leptolyngbyales	Leptolyngbyaceae	Phormidium SAG 37.90	unclassified_Phormidium SAG 37.90	0	0	51	0	0	0	0	52	0	0	0	0	0	0	1205	0	0	0	275	0	0	0	0	0	0	0
ASV_238	Bacteria	Acidobacteriota	Blastocatellia	Blastocatellales	Blastocatellaceae	Stenotrophobacter	unclassified_Stenotrophobacter	141	61	0	0	0	0	93	0	0	0	0	0	289	193	25	50	644	0	0	0	0	26	0	0	0	53
ASV_239	Bacteria	Proteobacteria	Alphaproteobacteria	Sphingomonadales	Sphingomonadaceae	Sphingomonas	unclassified_Sphingomonas	65	144	36	294	71	0	53	0	0	0	0	0	142	0	371	142	251	0	0	0	0	0	0	0	0	0
ASV_240	Bacteria	Actinobacteriota	Acidimicrobiia	unclassified_Acidimicrobiia	unclassified_Acidimicrobiia	unclassified_Acidimicrobiia	unclassified_Acidimicrobiia	17	0	28	0	25	14	50	0	0	0	0	0	0	0	75	0	0	0	77	400	270	0	0	612	0	0
ASV_241	Bacteria	Planctomycetota	Phycisphaerae	Tepidisphaerales	WD2101 soil group	unclassified_WD2101 soil group	unclassified_WD2101 soil group	81	451	0	330	0	0	0	0	4	0	0	8	0	0	0	0	683	0	0	0	0	0	0	0	0	0
ASV_242	Bacteria	Proteobacteria	Gammaproteobacteria	Burkholderiales	Comamonadaceae	Polaromonas	unclassified_Polaromonas	0	0	0	0	0	0	0	0	0	0	1409	112	0	0	0	0	29	0	0	0	0	0	0	0	0	0
ASV_243	Bacteria	Proteobacteria	Alphaproteobacteria	Rhizobiales	Xanthobacteraceae	Tardiphaga	unclassified_Tardiphaga	0	111	0	45	0	0	0	0	281	104	662	207	67	22	0	0	50	0	0	0	0	0	0	0	0	0
ASV_244	Bacteria	Actinobacteriota	Actinobacteria	Euzebyales	Euzebyaceae	unclassified_Euzebyaceae	unclassified_Euzebyaceae	0	0	0	0	33	0	0	42	0	0	0	0	0	0	0	0	0	15	0	615	0	0	0	812	0	0
ASV_245	Bacteria	Actinobacteriota	Actinobacteria	Propionibacteriales	Nocardioidaceae	Nocardioides	unclassified_Nocardioides	50	18	43	113	262	194	210	34	0	0	0	0	8	0	258	179	30	26	0	0	0	90	0	0	0	0
ASV_246	Bacteria	Bacteroidota	Bacteroidia	Chitinophagales	Chitinophagaceae	Segetibacter	unclassified_Segetibacter	302	34	60	53	137	56	216	65	0	0	0	0	0	0	393	36	45	29	52	0	0	6	0	0	0	0
ASV_247	Bacteria	Verrucomicrobiota	Verrucomicrobiae	Chthoniobacterales	Chthoniobacteraceae	Candidatus Udaeobacter	unclassified_Candidatus Udaeobacter	40	0	0	0	22	0	0	0	0	0	0	0	17	0	152	646	0	27	0	0	0	0	0	0	24	556
ASV_248	Bacteria	Proteobacteria	Alphaproteobacteria	Sphingomonadales	Sphingomonadaceae	Sphingomonas	unclassified_Sphingomonas	0	0	0	0	38	0	0	0	0	0	0	0	0	0	115	168	0	0	81	0	0	108	0	0	38	935
ASV_249	Bacteria	Bacteroidota	Bacteroidia	Flavobacteriales	Flavobacteriaceae	Flavobacterium	unclassified_Flavobacterium	529	536	12	22	138	21	0	0	0	0	39	18	0	0	31	0	129	0	0	0	0	0	0	0	0	0
ASV_250	Bacteria	Proteobacteria	Alphaproteobacteria	Azospirillales	Azospirillaceae	Skermanella	unclassified_Skermanella	307	139	78	248	81	0	0	0	0	0	0	0	0	0	0	0	620	0	0	0	0	0	0	0	0	0
ASV_251	Bacteria	Gemmatimonadota	AKAU4049	unclassified_AKAU4049	unclassified_AKAU4049	unclassified_AKAU4049	unclassified_AKAU4049	0	0	0	0	0	0	0	0	0	0	0	0	0	0	0	0	0	0	0	0	1444	0	24	0	0	0
ASV_252	Bacteria	Acidobacteriota	Blastocatellia	Pyrinomonadales	Pyrinomonadaceae	RB41	unclassified_RB41	0	0	0	0	0	0	0	0	0	0	0	0	281	1064	28	0	0	0	0	0	0	0	0	0	0	82
ASV_253	Bacteria	Actinobacteriota	Thermoleophilia	Solirubrobacterales	Solirubrobacteraceae	Conexibacter	unclassified_Conexibacter	0	0	0	0	0	0	0	0	0	0	0	0	0	0	0	0	0	0	0	302	0	0	0	1152	0	0
ASV_254	Bacteria	Actinobacteriota	Thermoleophilia	Solirubrobacterales	67-14	unclassified_67-14	unclassified_67-14	0	0	0	0	0	0	0	0	0	0	0	0	0	0	0	0	0	0	19	0	1432	0	0	0	0	0
ASV_255	Bacteria	Actinobacteriota	Acidimicrobiia	Actinomarinales	unclassified_Actinomarinales	unclassified_Actinomarinales	unclassified_Actinomarinales	0	0	0	0	0	0	0	0	0	0	0	0	0	0	0	0	0	0	143	0	880	0	425	0	0	0
ASV_256	Bacteria	Verrucomicrobiota	Verrucomicrobiae	Pedosphaerales	Pedosphaeraceae	unclassified_Pedosphaeraceae	unclassified_Pedosphaeraceae	21	0	126	0	43	0	126	97	0	0	0	0	0	6	291	66	0	0	88	213	214	0	0	56	9	87
ASV_257	Bacteria	Verrucomicrobiota	Verrucomicrobiae	Chthoniobacterales	Chthoniobacteraceae	unclassified_Chthoniobacteraceae	unclassified_Chthoniobacteraceae	16	0	69	0	67	0	38	120	0	0	0	0	0	0	562	90	44	97	205	0	27	91	0	0	13	0
ASV_258	Bacteria	Actinobacteriota	Rubrobacteria	Rubrobacterales	Rubrobacteriaceae	Rubrobacter	radiotolerans	0	7	0	0	13	32	76	76	0	0	0	0	0	0	164	0	0	0	315	46	382	0	69	259	0	0
ASV_259	Bacteria	Actinobacteriota	Acidimicrobiia	Actinomarinales	unclassified_Actinomarinales	unclassified_Actinomarinales	unclassified_Actinomarinales	0	0	0	0	207	51	67	287	64	0	0	0	0	0	0	0	58	0	599	105	0	0	0	0	0	0
ASV_260	Bacteria	Actinobacteriota	Thermoleophilia	Solirubrobacterales	Solirubrobacteraceae	Solirubrobacter	unclassified_Solirubrobacter	0	0	0	0	0	0	0	0	0	0	0	0	0	0	0	70	0	0	0	575	0	0	0	786	0	0
ASV_261	Bacteria	Chloroflexi	Anaerolineae	SBR1031	A4b	unclassified_A4b	unclassified_A4b	0	0	402	20	126	30	319	312	0	0	0	0	0	0	0	0	0	0	193	0	17	0	0	0	0	0
ASV_262	Bacteria	Verrucomicrobiota	Verrucomicrobiae	Chthoniobacterales	Chthoniobacteraceae	Candidatus Udaeobacter	unclassified_Candidatus Udaeobacter	0	0	58	0	165	31	70	102	0	0	0	0	0	0	415	28	0	85	182	136	0	137	0	0	0	0
ASV_263	Bacteria	Actinobacteriota	Actinobacteria	Propionibacteriales	Nocardioidaceae	Marmoricola	unclassified_Marmoricola	53	109	20	59	75	0	0	0	19	7	0	225	278	240	0	0	275	0	0	0	0	0	0	0	0	46
ASV_264	Bacteria	Actinobacteriota	Rubrobacteria	Rubrobacterales	Rubrobacteriaceae	Rubrobacter	unclassified_Rubrobacter	0	0	0	0	0	98	57	307	37	0	0	0	0	0	55	64	0	651	0	64	0	0	0	73	0	0
ASV_265	Bacteria	Bacteroidota	Bacteroidia	Chitinophagales	Chitinophagaceae	unclassified_Chitinophagaceae	unclassified_Chitinophagaceae	109	158	61	294	0	0	0	0	0	0	0	0	0	0	0	0	782	0	0	0	0	0	0	0	0	0
ASV_266	Bacteria	Actinobacteriota	Thermoleophilia	Solirubrobacterales	Solirubrobacteraceae	Solirubrobacter	unclassified_Solirubrobacter	0	0	31	62	69	44	122	49	0	0	0	0	0	0	123	0	30	73	104	152	58	38	0	449	0	0
ASV_267	Bacteria	Chloroflexi	KD4-96	unclassified_KD4-96	unclassified_KD4-96	unclassified_KD4-96	unclassified_KD4-96	0	0	0	0	43	42	49	142	0	0	0	0	90	14	140	262	0	0	63	409	0	53	0	86	0	0
ASV_268	Bacteria	Chloroflexi	SHA-26	unclassified_SHA-26	unclassified_SHA-26	unclassified_SHA-26	unclassified_SHA-26	0	0	0	0	0	0	0	0	0	0	0	0	0	0	0	0	0	0	12	109	845	0	224	201	0	0
ASV_269	Bacteria	Acidobacteriota	Subgroup 25	unclassified_Subgroup 25	unclassified_Subgroup 25	unclassified_Subgroup 25	unclassified_Subgroup 25	0	0	0	0	0	0	0	0	0	0	0	0	0	0	0	0	0	0	4	0	0	1387	0	0	0	0
ASV_270	Bacteria	Acidobacteriota	Blastocatellia	Pyrinomonadales	Pyrinomonadaceae	RB41	unclassified_RB41	0	0	0	0	0	0	0	0	0	0	0	0	0	0	0	0	0	0	0	0	0	0	0	0	170	1216
ASV_272	Bacteria	Actinobacteriota	Actinobacteria	Propionibacteriales	Nocardioidaceae	Nocardioides	unclassified_Nocardioides	83	95	23	187	149	45	42	0	121	46	63	143	59	0	40	81	120	0	0	0	0	0	0	0	0	81
ASV_273	Bacteria	Actinobacteriota	Actinobacteria	unclassified_Actinobacteria	unclassified_Actinobacteria	unclassified_Actinobacteria	unclassified_Actinobacteria	0	0	0	7	53	189	0	817	0	0	0	0	0	0	0	13	0	0	0	15	12	0	0	272	0	0
ASV_274	Bacteria	Planctomycetota	Phycisphaerae	Tepidisphaerales	WD2101 soil group	unclassified_WD2101 soil group	unclassified_WD2101 soil group	98	121	27	137	87	0	0	0	30	6	32	41	40	9	69	28	651	0	0	0	0	0	0	0	0	0
ASV_275	Bacteria	Proteobacteria	Alphaproteobacteria	Rhizobiales	Xanthobacteraceae	Afipia	unclassified_Afipia	0	0	0	0	0	0	0	0	0	0	57	114	995	210	0	0	0	0	0	0	0	0	0	0	0	0
ASV_276	Bacteria	Actinobacteriota	Actinobacteria	Frankiales	Geodermatophilaceae	unclassified_Geodermatophilaceae	unclassified_Geodermatophilaceae	89	368	0	569	0	0	0	0	0	0	0	40	18	0	0	0	288	0	0	0	0	0	0	0	0	0
ASV_277	Bacteria	Chloroflexi	Chloroflexia	Thermomicrobiales	JG30-KF-CM45	unclassified_JG30-KF-CM45	unclassified_JG30-KF-CM45	0	0	0	0	27	0	0	74	0	0	0	0	0	0	0	0	0	0	150	445	46	0	0	610	5	0
ASV_278	Bacteria	Bdellovibrionota	Oligoflexia	Oligoflexales	Oligoflexaceae	Oligoflexus	unclassified_Oligoflexus	269	176	31	104	267	77	14	0	174	12	0	43	34	0	0	0	153	0	0	0	0	0	0	0	0	0
ASV_279	Bacteria	Verrucomicrobiota	Verrucomicrobiae	Chthoniobacterales	Chthoniobacteraceae	Chthoniobacter	unclassified_Chthoniobacter	0	0	52	0	595	107	0	0	0	0	0	0	0	0	407	0	188	0	0	0	0	0	0	0	0	0
ASV_280	Bacteria	Cyanobacteria	Cyanobacteriia	Cyanobacteriales	Nostocaceae	Rivularia PCC-7116	unclassified_Rivularia PCC-7116	0	9	318	664	22	0	176	0	0	0	0	0	0	0	21	25	14	0	85	0	10	4	0	0	0	0
ASV_281	Bacteria	Chloroflexi	KD4-96	unclassified_KD4-96	unclassified_KD4-96	unclassified_KD4-96	unclassified_KD4-96	67	15	43	17	274	46	118	236	65	0	0	0	0	0	241	100	70	0	0	46	0	0	0	0	0	0
ASV_282	Bacteria	Gemmatimonadota	Gemmatimonadetes	Gemmatimonadales	Gemmatimonadaceae	unclassified_Gemmatimonadaceae	unclassified_Gemmatimonadaceae	73	68	0	50	0	0	36	0	0	0	0	0	0	0	56	151	900	0	0	0	0	0	0	0	0	0
ASV_283	Bacteria	Acidobacteriota	Blastocatellia	Pyrinomonadales	Pyrinomonadaceae	RB41	unclassified_RB41	0	0	0	0	192	0	0	0	0	0	0	0	0	0	0	0	0	0	82	0	0	76	0	0	103	875
ASV_284	Bacteria	Actinobacteriota	Actinobacteria	Pseudonocardiales	Pseudonocardiaceae	Crossiella	unclassified_Crossiella	0	0	0	0	0	121	0	295	0	0	0	0	0	0	123	253	0	379	0	0	0	0	0	147	0	0
ASV_286	Bacteria	Acidobacteriota	Blastocatellia	Blastocatellales	Blastocatellaceae	Blastocatella	unclassified_Blastocatella	0	0	31	0	154	123	148	168	0	0	0	0	0	0	65	249	0	332	0	45	0	0	0	0	0	0
ASV_287	Bacteria	Patescibacteria	ABY1	Candidatus Falkowbacteria	unclassified_Candidatus Falkowbacteria	unclassified_Candidatus Falkowbacteria	unclassified_Candidatus Falkowbacteria	6	5	0	26	0	0	0	0	59	0	28	23	54	0	0	0	1107	0	0	0	0	0	0	0	0	0
ASV_288	Bacteria	Acidobacteriota	Blastocatellia	Blastocatellales	Blastocatellaceae	Blastocatella	unclassified_Blastocatella	0	0	202	95	103	55	218	197	0	0	0	0	0	0	0	92	40	99	0	21	0	0	0	184	0	0
ASV_289	Bacteria	Proteobacteria	Alphaproteobacteria	Sphingomonadales	Sphingomonadaceae	Sphingomonas	unclassified_Sphingomonas	82	0	0	444	120	34	195	96	0	0	0	0	0	0	0	69	0	159	29	34	0	41	0	0	0	0
ASV_290	Bacteria	Deinococcota	Deinococci	Deinococcales	Trueperaceae	Truepera	unclassified_Truepera	0	0	0	0	0	0	0	6	0	0	0	0	0	0	0	0	0	0	0	217	21	0	294	760	0	0
ASV_291	Bacteria	Acidobacteriota	Vicinamibacteria	Vicinamibacterales	unclassified_Vicinamibacterales	unclassified_Vicinamibacterales	unclassified_Vicinamibacterales	20	0	0	0	44	0	0	0	0	0	0	0	0	0	193	0	0	0	129	0	0	160	0	0	26	725
ASV_292	Bacteria	Bacteroidota	Bacteroidia	Chitinophagales	Chitinophagaceae	Edaphobaculum	unclassified_Edaphobaculum	26	93	123	28	155	91	114	295	0	0	0	0	0	0	169	26	84	79	6	0	0	0	0	0	6	0
ASV_293	Bacteria	Proteobacteria	Alphaproteobacteria	Sphingomonadales	Sphingomonadaceae	Sphingomonas	unclassified_Sphingomonas	0	0	0	0	0	0	0	0	0	0	0	0	0	0	0	0	0	0	0	0	30	0	1265	0	0	0
ASV_294	Bacteria	Acidobacteriota	Blastocatellia	Blastocatellales	Blastocatellaceae	Stenotrophobacter	unclassified_Stenotrophobacter	62	0	18	391	97	0	106	99	0	0	0	0	0	0	0	434	73	0	0	0	0	0	0	0	0	0
ASV_295	Bacteria	Actinobacteriota	Actinobacteria	Micrococcales	Microbacteriaceae	Cryobacterium	unclassified_Cryobacterium	75	107	62	25	38	13	0	0	265	111	39	79	229	94	0	0	133	0	0	0	0	7	0	0	0	0
ASV_296	Bacteria	Bacteroidota	Bacteroidia	Cytophagales	Hymenobacteraceae	Hymenobacter	swuensis	200	160	31	527	117	20	98	0	0	0	0	0	68	0	0	16	36	0	0	0	0	0	0	0	0	0
ASV_297	Bacteria	Gemmatimonadota	Gemmatimonadetes	Gemmatimonadales	Gemmatimonadaceae	Gemmatimonas	unclassified_Gemmatimonas	0	0	0	0	0	0	0	0	142	0	587	144	400	0	0	0	0	0	0	0	0	0	0	0	0	0
ASV_298	Bacteria	Actinobacteriota	Thermoleophilia	Gaiellales	Gaiellaceae	Gaiella	unclassified_Gaiella	40	37	20	0	87	0	50	15	361	18	0	32	0	0	103	0	84	53	88	0	0	105	0	0	65	109
ASV_299	Bacteria	Bacteroidota	Bacteroidia	Flavobacteriales	Flavobacteriaceae	Antarcticibacterium	unclassified_Antarcticibacterium	0	0	0	0	0	0	0	0	0	0	0	0	0	0	0	0	0	0	0	168	67	0	1028	0	0	0
ASV_300	Bacteria	Proteobacteria	Gammaproteobacteria	Xanthomonadales	Rhodanobacteraceae	Dokdonella	unclassified_Dokdonella	17	39	24	38	0	0	0	0	0	0	0	19	615	29	0	154	160	0	0	0	0	166	0	0	0	0
ASV_301	Bacteria	Chloroflexi	KD4-96	unclassified_KD4-96	unclassified_KD4-96	unclassified_KD4-96	unclassified_KD4-96	8	0	60	0	50	36	104	85	0	0	0	44	176	67	121	30	46	43	149	110	15	109	0	8	0	0
ASV_302	Bacteria	Actinobacteriota	Rubrobacteria	Rubrobacterales	Rubrobacteriaceae	Rubrobacter	unclassified_Rubrobacter	0	0	0	0	0	0	0	0	0	0	0	0	0	0	0	0	0	0	0	77	0	0	0	1184	0	0
ASV_303	Bacteria	Bacteroidota	Bacteroidia	Cytophagales	Hymenobacteraceae	Hymenobacter	unclassified_Hymenobacter	113	214	30	746	49	29	0	0	7	0	0	21	37	0	0	0	13	0	0	0	0	0	0	0	0	0
ASV_304	Bacteria	Proteobacteria	Gammaproteobacteria	Burkholderiales	Burkholderiaceae	Ralstonia	insidiosa	0	36	0	52	46	0	81	61	41	40	55	77	413	57	66	111	0	0	0	54	10	0	9	0	0	50
ASV_305	Bacteria	Bacteroidota	Bacteroidia	Sphingobacteriales	Sphingobacteriaceae	Pedobacter	unclassified_Pedobacter	481	63	77	302	151	24	0	0	0	0	0	0	0	0	0	0	131	0	0	0	0	0	0	0	0	28
ASV_306	Bacteria	Verrucomicrobiota	Verrucomicrobiae	Chthoniobacterales	Chthoniobacteraceae	unclassified_Chthoniobacteraceae	unclassified_Chthoniobacteraceae	0	0	33	28	29	0	158	147	0	0	0	0	0	0	68	28	17	162	198	99	171	98	0	20	0	0
ASV_307	Bacteria	Bacteroidota	Bacteroidia	Chitinophagales	Chitinophagaceae	Flavisolibacter	unclassified_Flavisolibacter	79	40	103	21	103	38	267	205	0	0	0	0	0	0	133	0	38	135	62	0	0	31	0	0	0	0
ASV_308	Bacteria	Acidobacteriota	Blastocatellia	Pyrinomonadales	Pyrinomonadaceae	RB41	unclassified_RB41	0	0	0	0	0	0	0	0	0	0	0	0	0	0	0	518	0	303	251	0	0	172	0	0	0	0
ASV_309	Bacteria	Bacteroidota	Bacteroidia	Cytophagales	Microscillaceae	unclassified_Microscillaceae	unclassified_Microscillaceae	393	190	102	69	21	0	142	32	0	0	0	0	0	0	75	44	113	3	25	0	0	34	0	0	0	0
ASV_310	Bacteria	Actinobacteriota	Actinobacteria	Corynebacteriales	Nocardiaceae	Rhodococcus	fascians	77	10	0	11	0	9	0	0	10	0	68	232	350	441	0	0	11	0	0	0	0	0	0	0	0	22
ASV_311	Bacteria	Actinobacteriota	Rubrobacteria	Rubrobacterales	Rubrobacteriaceae	Rubrobacter	unclassified_Rubrobacter	0	0	0	0	0	23	86	0	0	0	0	0	0	0	0	0	0	0	0	243	110	0	213	565	0	0
ASV_312	Bacteria	Deinococcota	Deinococci	Deinococcales	Trueperaceae	Truepera	unclassified_Truepera	0	0	0	0	0	0	0	0	0	0	0	0	0	0	581	0	0	0	0	99	0	7	0	546	0	0
ASV_313	Bacteria	Bacteroidota	Bacteroidia	Sphingobacteriales	AKYH767	unclassified_AKYH767	unclassified_AKYH767	0	0	0	14	0	0	0	0	40	0	206	157	527	77	104	0	50	0	0	0	0	23	0	0	0	32
ASV_314	Bacteria	Actinobacteriota	MB-A2-108	unclassified_MB-A2-108	unclassified_MB-A2-108	unclassified_MB-A2-108	unclassified_MB-A2-108	0	0	0	0	41	0	0	0	52	6	0	0	35	0	23	0	0	0	105	0	0	0	0	0	59	908
ASV_315	Bacteria	Actinobacteriota	Thermoleophilia	Gaiellales	Gaiellaceae	Gaiella	unclassified_Gaiella	26	7	50	16	42	31	138	60	0	0	0	6	331	27	119	109	61	141	0	0	0	64	0	0	0	0
ASV_316	Bacteria	Acidobacteriota	Blastocatellia	Blastocatellales	Blastocatellaceae	Blastocatella	unclassified_Blastocatella	65	0	0	151	103	0	166	0	0	0	0	0	0	0	156	175	0	0	0	0	0	0	0	408	0	0
ASV_317	Bacteria	Bacteroidota	Bacteroidia	Chitinophagales	Chitinophagaceae	unclassified_Chitinophagaceae	unclassified_Chitinophagaceae	0	0	0	0	0	0	0	0	945	100	0	40	0	0	0	0	134	0	0	0	0	0	0	0	0	0
ASV_318	Bacteria	Proteobacteria	Gammaproteobacteria	Burkholderiales	Comamonadaceae	Rhodoferax	unclassified_Rhodoferax	0	69	0	0	0	0	0	0	0	0	730	201	35	156	0	0	27	0	0	0	0	0	0	0	0	0
ASV_319	Bacteria	Bacteroidota	Bacteroidia	Chitinophagales	Chitinophagaceae	Flavisolibacter	unclassified_Flavisolibacter	0	0	0	0	0	0	0	0	0	0	0	0	0	0	0	0	0	0	0	1017	77	0	0	113	0	0
ASV_320	Bacteria	Chloroflexi	KD4-96	unclassified_KD4-96	unclassified_KD4-96	unclassified_KD4-96	unclassified_KD4-96	0	0	0	0	0	0	0	23	0	0	0	0	0	0	0	0	0	0	0	339	0	0	0	843	0	0
ASV_321	Bacteria	Proteobacteria	Alphaproteobacteria	Sphingomonadales	Sphingomonadaceae	Sphingomonas	unclassified_Sphingomonas	234	76	71	86	556	44	25	0	17	0	0	0	0	0	0	0	93	0	0	0	0	0	0	0	0	0
ASV_322	Bacteria	Proteobacteria	Alphaproteobacteria	Sphingomonadales	Sphingomonadaceae	Sphingobium	unclassified_Sphingobium	0	0	0	0	0	0	0	0	0	0	1200	0	0	0	0	0	0	0	0	0	0	0	0	0	0	0
ASV_323	Bacteria	Proteobacteria	Gammaproteobacteria	Burkholderiales	Comamonadaceae	Polaromonas	unclassified_Polaromonas	0	0	0	0	0	0	0	0	0	0	130	0	173	129	0	0	0	0	0	0	0	0	0	0	0	767
ASV_324	Bacteria	Verrucomicrobiota	Verrucomicrobiae	Chthoniobacterales	Chthoniobacteraceae	Chthoniobacter	unclassified_Chthoniobacter	56	65	0	0	0	94	0	0	193	0	0	75	494	85	0	0	132	0	0	0	0	0	0	0	0	0
ASV_325	Bacteria	Proteobacteria	Gammaproteobacteria	Burkholderiales	Burkholderiaceae	Lautropia	unclassified_Lautropia	0	0	64	0	114	151	127	101	0	0	0	0	20	26	131	0	0	86	125	102	17	81	0	49	0	0
ASV_326	Bacteria	Actinobacteriota	Acidimicrobiia	Actinomarinales	unclassified_Actinomarinales	unclassified_Actinomarinales	unclassified_Actinomarinales	0	0	0	0	0	0	0	0	0	0	0	0	0	0	0	0	0	0	0	0	1036	0	156	0	0	0
ASV_327	Bacteria	Bacteroidota	Bacteroidia	Chitinophagales	Chitinophagaceae	Segetibacter	unclassified_Segetibacter	45	0	0	34	0	0	254	69	0	0	0	0	0	0	604	0	0	46	49	89	0	0	0	0	0	0
ASV_328	Bacteria	Bacteroidota	Bacteroidia	Cytophagales	Microscillaceae	Hassallia	unclassified_Hassallia	219	170	101	190	0	29	265	0	0	0	0	0	0	0	53	30	22	0	78	26	0	0	0	0	0	0
ASV_329	Bacteria	Acidobacteriota	Acidobacteriae	Bryobacterales	Bryobacteraceae	Bryobacter	unclassified_Bryobacter	0	0	0	0	0	0	0	0	16	0	0	1076	43	20	0	0	0	0	0	0	0	0	0	0	0	23
ASV_330	Bacteria	Acidobacteriota	Thermoanaerobaculia	Thermoanaerobaculales	Thermoanaerobaculaceae	Subgroup 10	unclassified_Subgroup 10	0	0	0	0	0	0	0	0	24	6	27	927	85	104	0	0	0	0	0	0	0	0	0	0	2	0
ASV_331	Bacteria	Proteobacteria	Gammaproteobacteria	Xanthomonadales	Rhodanobacteraceae	Dokdonella	unclassified_Dokdonella	0	0	0	0	0	0	0	0	6	11	18	48	801	28	114	0	132	0	0	0	0	16	0	0	0	0
ASV_332	Bacteria	Chloroflexi	Chloroflexia	Thermomicrobiales	JG30-KF-CM45	unclassified_JG30-KF-CM45	unclassified_JG30-KF-CM45	0	0	0	0	0	0	0	0	0	0	0	0	0	0	0	0	0	0	0	85	354	0	646	80	0	0
ASV_333	Bacteria	Actinobacteriota	Rubrobacteria	Rubrobacterales	Rubrobacteriaceae	Rubrobacter	unclassified_Rubrobacter	0	0	0	0	0	0	0	0	0	0	0	0	0	0	0	0	0	0	0	124	0	0	0	1039	0	0
ASV_334	Bacteria	Bacteroidota	Bacteroidia	Chitinophagales	Chitinophagaceae	Ferruginibacter	unclassified_Ferruginibacter	141	65	0	19	0	0	0	0	0	0	0	451	0	0	0	0	450	0	0	0	0	0	0	0	0	33
ASV_335	Bacteria	Acidobacteriota	Blastocatellia	Blastocatellales	Blastocatellaceae	JGI 0001001-H03	unclassified_JGI 0001001-H03	122	0	30	27	185	38	119	97	0	0	0	0	0	0	71	433	33	0	0	0	0	0	0	0	0	0
ASV_336	Bacteria	Actinobacteriota	Actinobacteria	Propionibacteriales	Nocardioidaceae	Aeromicrobium	unclassified_Aeromicrobium	0	0	0	0	0	0	0	0	948	81	0	59	43	18	0	0	0	0	0	0	0	0	0	0	0	0
ASV_337	Bacteria	Actinobacteriota	Thermoleophilia	Solirubrobacterales	Solirubrobacteraceae	Conexibacter	unclassified_Conexibacter	88	64	31	418	13	0	17	66	0	0	0	0	0	15	35	0	368	0	0	0	0	0	0	0	0	29
ASV_338	Bacteria	Bacteroidota	Bacteroidia	Chitinophagales	Chitinophagaceae	Ferruginibacter	unclassified_Ferruginibacter	714	33	0	33	0	28	0	0	0	0	0	0	0	0	294	0	0	0	41	0	0	0	0	0	0	0
ASV_339	Bacteria	Gemmatimonadota	Gemmatimonadetes	Gemmatimonadales	Gemmatimonadaceae	unclassified_Gemmatimonadaceae	unclassified_Gemmatimonadaceae	0	0	0	0	0	0	0	9	0	0	0	29	434	421	60	0	0	0	57	0	0	0	0	0	0	124
ASV_340	Bacteria	Gemmatimonadota	Gemmatimonadetes	Gemmatimonadales	Gemmatimonadaceae	unclassified_Gemmatimonadaceae	unclassified_Gemmatimonadaceae	0	0	0	0	0	0	0	0	0	0	0	0	60	173	32	31	0	0	0	0	0	130	0	0	0	700
ASV_341	Bacteria	Actinobacteriota	Actinobacteria	Micrococcales	Intrasporangiaceae	unclassified_Intrasporangiaceae	unclassified_Intrasporangiaceae	0	0	25	40	197	251	108	133	0	0	0	0	0	0	197	25	0	49	0	28	0	17	0	54	0	0
ASV_342	Bacteria	Proteobacteria	Gammaproteobacteria	Burkholderiales	SC-I-84	unclassified_SC-I-84	unclassified_SC-I-84	0	0	0	0	0	0	0	0	0	0	21	129	394	321	96	0	21	0	20	0	0	122	0	0	0	0
ASV_343	Bacteria	Actinobacteriota	Thermoleophilia	Solirubrobacterales	67-14	unclassified_67-14	unclassified_67-14	96	63	20	137	88	54	38	0	0	0	0	14	159	133	74	0	247	0	0	0	0	0	0	0	0	0
ASV_344	Bacteria	Proteobacteria	Gammaproteobacteria	Burkholderiales	Burkholderiaceae	Lautropia	unclassified_Lautropia	164	74	167	370	103	0	0	0	0	0	0	0	0	0	70	61	113	0	0	0	0	0	0	0	0	0
ASV_345	Bacteria	Bacteroidota	Bacteroidia	Cytophagales	unclassified_Cytophagales	unclassified_Cytophagales	unclassified_Cytophagales	87	142	58	322	36	10	90	11	0	0	0	23	39	0	75	193	31	0	0	0	0	0	0	0	0	0
ASV_346	Bacteria	Acidobacteriota	Holophagae	Subgroup 7	unclassified_Subgroup 7	unclassified_Subgroup 7	unclassified_Subgroup 7	0	0	0	0	0	0	0	0	0	0	0	0	18	0	0	0	0	0	0	0	0	0	0	0	102	994
ASV_347	Bacteria	Acidobacteriota	Blastocatellia	Blastocatellales	Blastocatellaceae	JGI 0001001-H03	unclassified_JGI 0001001-H03	0	177	0	44	0	0	0	0	0	0	0	0	0	0	115	0	145	0	79	369	0	0	0	184	0	0
ASV_348	Bacteria	Chloroflexi	Gitt-GS-136	unclassified_Gitt-GS-136	unclassified_Gitt-GS-136	unclassified_Gitt-GS-136	unclassified_Gitt-GS-136	10	0	10	12	163	0	0	16	33	0	0	0	11	0	241	106	10	16	120	0	0	194	0	0	11	157
ASV_349	Bacteria	Proteobacteria	Alphaproteobacteria	Micropepsales	Micropepsaceae	unclassified_Micropepsaceae	unclassified_Micropepsaceae	201	191	82	75	104	21	50	20	0	0	0	0	0	0	41	0	290	0	14	0	0	9	0	0	11	0
ASV_350	Bacteria	Actinobacteriota	Thermoleophilia	Gaiellales	unclassified_Gaiellales	unclassified_Gaiellales	unclassified_Gaiellales	0	0	0	0	0	0	0	0	88	0	0	6	210	16	102	0	0	0	0	0	0	0	0	0	141	543
ASV_351	Bacteria	Bacteroidota	Bacteroidia	Cytophagales	Microscillaceae	Hassallia	unclassified_Hassallia	44	0	122	0	44	0	104	137	0	0	0	0	0	0	129	0	0	111	243	0	75	95	0	0	0	0
ASV_352	Bacteria	Actinobacteriota	Thermoleophilia	Solirubrobacterales	Solirubrobacteraceae	unclassified_Solirubrobacteraceae	unclassified_Solirubrobacteraceae	0	0	30	0	123	0	0	224	0	0	0	0	0	0	95	84	0	135	131	0	0	0	0	237	33	0
ASV_353	Bacteria	Bacteroidota	Bacteroidia	Cytophagales	Cytophagaceae	Rhodocytophaga	unclassified_Rhodocytophaga	153	39	305	53	37	28	180	110	0	0	0	0	11	0	82	20	18	19	17	0	0	18	0	0	0	0
ASV_354	Bacteria	Proteobacteria	Alphaproteobacteria	Rhizobiales	Xanthobacteraceae	Ancylobacter	unclassified_Ancylobacter	41	29	27	42	53	11	44	16	40	49	28	69	345	57	57	104	0	0	0	76	0	0	0	0	0	0
ASV_355	Bacteria	Bacteroidota	Bacteroidia	Chitinophagales	Chitinophagaceae	Segetibacter	unclassified_Segetibacter	85	52	0	641	0	0	0	0	26	0	0	14	57	32	0	0	177	0	0	0	0	0	0	0	0	0
ASV_356	Bacteria	Verrucomicrobiota	Verrucomicrobiae	Verrucomicrobiales	Verrucomicrobiaceae	unclassified_Verrucomicrobiaceae	unclassified_Verrucomicrobiaceae	117	47	28	50	72	22	65	58	0	0	0	15	0	0	113	0	108	34	112	106	66	19	0	44	0	5
ASV_357	Bacteria	Chloroflexi	Chloroflexia	Thermomicrobiales	JG30-KF-CM45	unclassified_JG30-KF-CM45	unclassified_JG30-KF-CM45	7	123	0	23	0	0	0	0	690	19	39	39	20	10	0	0	109	0	0	0	0	0	0	0	0	0
ASV_358	Bacteria	Gemmatimonadota	Gemmatimonadetes	Gemmatimonadales	Gemmatimonadaceae	unclassified_Gemmatimonadaceae	unclassified_Gemmatimonadaceae	0	0	0	0	0	0	0	0	0	0	0	0	56	0	0	9	0	0	0	0	0	0	0	0	178	833
ASV_359	Bacteria	Actinobacteriota	Actinobacteria	Propionibacteriales	Nocardioidaceae	Aeromicrobium	unclassified_Aeromicrobium	69	125	17	158	139	37	71	23	0	0	0	0	0	0	21	73	258	0	25	0	0	0	0	0	0	57
ASV_360	Bacteria	Acidobacteriota	Vicinamibacteria	Vicinamibacterales	Vicinamibacteraceae	unclassified_Vicinamibacteraceae	unclassified_Vicinamibacteraceae	65	42	51	0	94	53	48	70	0	0	0	0	116	22	45	170	198	63	0	0	0	34	0	0	0	0
ASV_361	Bacteria	Proteobacteria	Alphaproteobacteria	Sphingomonadales	Sphingomonadaceae	Ellin6055	unclassified_Ellin6055	0	0	676	0	0	72	164	159	0	0	0	0	0	0	0	0	0	0	0	0	0	0	0	0	0	0
ASV_362	Bacteria	Actinobacteriota	Thermoleophilia	Solirubrobacterales	67-14	unclassified_67-14	unclassified_67-14	0	0	0	0	0	21	0	31	0	0	0	0	0	0	27	24	0	545	0	42	0	30	0	345	0	0
ASV_363	Bacteria	Actinobacteriota	Thermoleophilia	Solirubrobacterales	67-14	unclassified_67-14	unclassified_67-14	0	0	0	0	0	0	0	0	0	0	0	0	0	0	0	0	0	0	0	156	67	0	723	117	0	0
ASV_364	Bacteria	Actinobacteriota	Acidimicrobiia	unclassified_Acidimicrobiia	unclassified_Acidimicrobiia	unclassified_Acidimicrobiia	unclassified_Acidimicrobiia	78	0	91	13	107	0	130	108	0	0	0	0	0	0	68	61	42	25	210	51	0	26	0	0	45	0
ASV_365	Bacteria	Acidobacteriota	Vicinamibacteria	Vicinamibacterales	unclassified_Vicinamibacterales	unclassified_Vicinamibacterales	unclassified_Vicinamibacterales	0	0	0	0	0	0	62	80	14	0	0	0	0	0	0	38	0	137	120	0	0	111	0	0	0	493
ASV_366	Bacteria	Gemmatimonadota	Gemmatimonadetes	Gemmatimonadales	Gemmatimonadaceae	unclassified_Gemmatimonadaceae	unclassified_Gemmatimonadaceae	0	0	0	0	0	0	0	0	0	0	0	0	522	512	0	0	0	0	0	0	0	0	0	0	0	20
ASV_367	Bacteria	Bacteroidota	Bacteroidia	Chitinophagales	Chitinophagaceae	Ferruginibacter	unclassified_Ferruginibacter	361	0	131	0	89	51	125	97	0	0	0	0	0	0	85	0	105	0	0	0	0	0	0	0	0	0
ASV_368	Bacteria	Gemmatimonadota	Longimicrobia	Longimicrobiales	Longimicrobiaceae	unclassified_Longimicrobiaceae	unclassified_Longimicrobiaceae	0	0	0	0	0	0	0	0	0	0	0	0	0	0	0	0	0	0	0	274	69	0	657	43	0	0
ASV_369	Bacteria	Chloroflexi	Anaerolineae	Caldilineales	Caldilineaceae	unclassified_Caldilineaceae	unclassified_Caldilineaceae	5	90	0	50	0	0	0	0	441	70	152	99	0	0	0	11	116	0	0	0	0	0	0	0	0	0
ASV_370	Bacteria	Myxococcota	Polyangia	Haliangiales	Haliangiaceae	Haliangium	unclassified_Haliangium	57	20	69	47	100	23	95	120	0	0	0	75	183	0	33	30	21	0	29	0	0	31	0	0	13	75
ASV_371	Bacteria	Actinobacteriota	Actinobacteria	Micrococcales	Microbacteriaceae	Subtercola	unclassified_Subtercola	0	0	0	0	0	0	0	0	494	0	258	269	0	0	0	0	0	0	0	0	0	0	0	0	0	0
ASV_372	Bacteria	Actinobacteriota	Thermoleophilia	Gaiellales	Gaiellaceae	Gaiella	unclassified_Gaiella	0	0	0	0	0	0	0	0	0	0	0	0	27	0	0	0	0	0	35	0	0	180	0	0	49	727
ASV_373	Bacteria	Proteobacteria	Alphaproteobacteria	Rhizobiales	Rhizobiales Incertae Sedis	unclassified_Rhizobiales Incertae Sedis	unclassified_Rhizobiales Incertae Sedis	32	94	0	6	0	0	0	0	0	0	0	151	220	277	0	62	152	0	0	0	0	22	0	0	0	0
ASV_374	Bacteria	Acidobacteriota	Blastocatellia	Blastocatellales	Blastocatellaceae	Blastocatella	unclassified_Blastocatella	26	12	22	8	71	30	61	74	0	0	0	0	0	0	215	21	21	0	94	38	28	22	0	270	0	0
ASV_375	Bacteria	Actinobacteriota	Rubrobacteria	Rubrobacterales	Rubrobacteriaceae	Rubrobacter	unclassified_Rubrobacter	0	0	53	0	131	167	97	392	0	0	0	0	0	0	0	0	29	0	0	62	0	0	0	82	0	0
ASV_376	Bacteria	Proteobacteria	Gammaproteobacteria	Nitrosococcales	Nitrosococcaceae	wb1-P19	unclassified_wb1-P19	166	0	123	0	546	0	0	0	0	0	0	0	0	0	0	0	0	0	0	177	0	0	0	0	0	0
ASV_377	Bacteria	Actinobacteriota	Actinobacteria	Euzebyales	Euzebyaceae	unclassified_Euzebyaceae	unclassified_Euzebyaceae	30	0	46	0	107	101	27	85	17	0	0	0	0	0	108	0	14	0	273	160	0	0	0	33	8	0
ASV_378	Bacteria	Proteobacteria	Gammaproteobacteria	Burkholderiales	Comamonadaceae	unclassified_Comamonadaceae	unclassified_Comamonadaceae	88	171	0	468	0	0	0	0	0	0	0	62	114	0	0	0	103	0	0	0	0	0	0	0	0	0
ASV_379	Bacteria	Actinobacteriota	Actinobacteria	0319-7L14	unclassified_0319-7L14	unclassified_0319-7L14	unclassified_0319-7L14	0	0	0	0	20	10	9	19	0	0	0	0	0	0	13	0	0	0	39	468	0	0	0	428	0	0
ASV_380	Bacteria	Actinobacteriota	Actinobacteria	Propionibacteriales	Nocardioidaceae	Nocardioides	unclassified_Nocardioides	93	200	0	128	0	0	0	0	0	0	0	0	0	28	0	0	551	0	0	0	0	0	0	0	0	0
ASV_381	Bacteria	Actinobacteriota	Rubrobacteria	Rubrobacterales	Rubrobacteriaceae	Rubrobacter	unclassified_Rubrobacter	0	0	0	43	56	119	99	69	0	0	0	0	0	0	190	0	0	76	18	96	0	0	0	231	0	0
ASV_382	Bacteria	Acidobacteriota	Blastocatellia	Pyrinomonadales	Pyrinomonadaceae	RB41	unclassified_RB41	0	0	0	0	0	0	0	0	0	0	0	0	0	0	0	996	0	0	0	0	0	0	0	0	0	0
ASV_383	Bacteria	Bacteroidota	Bacteroidia	Chitinophagales	Chitinophagaceae	Segetibacter	unclassified_Segetibacter	159	125	0	321	91	0	0	0	0	0	0	0	0	0	0	41	258	0	0	0	0	0	0	0	0	0
ASV_384	Bacteria	Actinobacteriota	Actinobacteria	Micrococcales	Microbacteriaceae	Subtercola	unclassified_Subtercola	0	0	0	0	0	0	0	0	451	101	202	241	0	0	0	0	0	0	0	0	0	0	0	0	0	0
ASV_385	Bacteria	Bacteroidota	Bacteroidia	Chitinophagales	Chitinophagaceae	Flavisolibacter	unclassified_Flavisolibacter	270	0	47	0	141	173	51	0	0	0	0	0	0	0	204	0	92	0	0	0	0	0	0	0	0	0
ASV_386	Bacteria	Acidobacteriota	Vicinamibacteria	Vicinamibacterales	unclassified_Vicinamibacterales	unclassified_Vicinamibacterales	unclassified_Vicinamibacterales	0	0	0	0	104	29	68	91	0	0	0	0	0	0	47	96	0	187	0	0	0	54	0	0	29	272
ASV_387	Bacteria	Verrucomicrobiota	Verrucomicrobiae	Verrucomicrobiales	Rubritaleaceae	Luteolibacter	algae	76	0	42	0	0	0	82	0	0	0	0	0	0	0	0	0	0	0	183	0	581	0	0	0	0	6
ASV_388	Bacteria	Bacteroidota	Bacteroidia	Sphingobacteriales	env.OPS 17	unclassified_env.OPS 17	unclassified_env.OPS 17	0	0	0	0	0	0	0	0	166	23	507	274	0	0	0	0	0	0	0	0	0	0	0	0	0	0
ASV_389	Bacteria	Bacteroidota	Bacteroidia	Chitinophagales	Saprospiraceae	Lewinella	marina	178	97	24	122	95	43	90	32	0	10	0	4	0	0	14	0	50	7	152	0	0	50	0	0	0	0
ASV_390	Bacteria	Bacteroidota	Bacteroidia	Chitinophagales	Chitinophagaceae	unclassified_Chitinophagaceae	unclassified_Chitinophagaceae	0	0	0	0	0	45	0	79	0	0	0	0	0	0	283	29	0	28	170	263	0	0	0	68	0	0
ASV_391	Bacteria	Proteobacteria	Alphaproteobacteria	Rhizobiales	Xanthobacteraceae	Bradyrhizobium	japonicum	0	0	0	0	0	0	0	0	0	0	577	385	0	0	0	0	0	0	0	0	0	0	0	0	0	0
ASV_392	Bacteria	Actinobacteriota	Actinobacteria	Propionibacteriales	Nocardioidaceae	Marmoricola	unclassified_Marmoricola	288	66	0	188	0	0	0	0	0	0	0	0	309	0	0	0	67	0	0	0	0	0	0	0	0	42
ASV_393	Bacteria	Acidobacteriota	Blastocatellia	Blastocatellales	Blastocatellaceae	Blastocatella	unclassified_Blastocatella	0	0	0	0	0	0	0	0	0	0	0	0	0	0	0	0	0	0	0	165	0	0	0	793	0	0
ASV_394	Bacteria	Proteobacteria	Gammaproteobacteria	Nitrosococcales	Nitrosococcaceae	SZB85	unclassified_SZB85	0	0	0	0	186	10	87	467	0	0	0	0	0	0	0	0	0	0	0	207	0	0	0	0	0	0
ASV_395	Bacteria	Proteobacteria	Alphaproteobacteria	Sphingomonadales	Sphingomonadaceae	Qipengyuania	unclassified_Qipengyuania	30	113	69	0	0	0	0	0	0	0	0	96	198	178	89	0	39	0	69	0	0	48	0	0	0	21
ASV_396	Bacteria	Gemmatimonadota	Gemmatimonadetes	Gemmatimonadales	Gemmatimonadaceae	unclassified_Gemmatimonadaceae	unclassified_Gemmatimonadaceae	0	0	4	3	23	0	17	23	3	0	0	0	0	0	0	0	0	0	82	335	121	0	236	83	0	17
ASV_397	Bacteria	Bdellovibrionota	Bdellovibrionia	Bdellovibrionales	Bdellovibrionaceae	Bdellovibrio	unclassified_Bdellovibrio	0	13	6	37	16	0	0	0	60	121	450	209	0	4	0	0	17	0	11	0	0	0	0	0	0	0
ASV_398	Bacteria	Proteobacteria	Alphaproteobacteria	Sphingomonadales	Sphingomonadaceae	Ellin6055	unclassified_Ellin6055	0	0	0	0	109	0	260	251	0	0	0	0	0	0	22	29	0	54	0	0	0	0	0	177	0	40
ASV_399	Bacteria	Proteobacteria	Gammaproteobacteria	Burkholderiales	Alcaligenaceae	Derxia	unclassified_Derxia	0	6	0	0	0	0	0	0	666	44	60	165	0	0	0	0	0	0	0	0	0	0	0	0	0	0
ASV_400	Bacteria	Bacteroidota	Bacteroidia	Cytophagales	Spirosomaceae	Spirosoma	spitsbergense	368	96	9	385	0	0	0	0	0	0	0	0	0	0	0	0	78	0	0	0	0	0	0	0	0	0
ASV_401	Bacteria	Bacteroidota	Bacteroidia	Chitinophagales	Chitinophagaceae	unclassified_Chitinophagaceae	unclassified_Chitinophagaceae	159	124	22	38	166	0	108	0	0	0	0	0	0	0	0	0	202	0	116	0	0	0	0	0	0	0
ASV_402	Bacteria	Planctomycetota	Planctomycetes	Isosphaerales	Isosphaeraceae	unclassified_Isosphaeraceae	unclassified_Isosphaeraceae	24	58	98	107	27	28	27	8	0	0	0	0	0	0	0	24	526	0	0	0	0	6	0	0	0	0
ASV_403	Bacteria	Bacteroidota	Bacteroidia	Flavobacteriales	Flavobacteriaceae	Flavobacterium	kingsejongi	67	76	0	417	55	0	76	23	0	0	0	0	0	0	135	14	64	0	0	0	0	0	0	0	0	5
ASV_404	Bacteria	Verrucomicrobiota	Verrucomicrobiae	Chthoniobacterales	Chthoniobacteraceae	Candidatus Udaeobacter	unclassified_Candidatus Udaeobacter	0	0	0	0	128	36	76	88	0	0	0	0	0	0	0	456	0	147	0	0	0	0	0	0	0	0
ASV_405	Bacteria	Bacteroidota	Bacteroidia	Sphingobacteriales	KD3-93	unclassified_KD3-93	unclassified_KD3-93	0	0	0	0	0	12	0	0	116	47	322	132	56	0	0	0	168	17	20	0	0	0	0	0	5	32
ASV_406	Bacteria	Verrucomicrobiota	Verrucomicrobiae	Verrucomicrobiales	Rubritaleaceae	Luteolibacter	unclassified_Luteolibacter	111	106	0	95	0	0	0	0	6	0	0	28	4	0	0	0	91	0	26	109	21	0	294	32	0	0
ASV_407	Bacteria	Actinobacteriota	Actinobacteria	Micrococcales	Microbacteriaceae	Subtercola	unclassified_Subtercola	0	0	0	0	0	0	0	0	397	0	274	245	0	0	0	0	0	0	0	0	0	0	0	0	0	0
ASV_408	Bacteria	Proteobacteria	Gammaproteobacteria	Burkholderiales	Comamonadaceae	unclassified_Comamonadaceae	unclassified_Comamonadaceae	0	162	0	489	0	0	0	0	0	0	60	131	65	0	0	0	0	0	0	0	0	0	0	0	0	0
ASV_409	Bacteria	Acidobacteriota	Vicinamibacteria	Vicinamibacterales	unclassified_Vicinamibacterales	unclassified_Vicinamibacterales	unclassified_Vicinamibacterales	0	0	0	0	0	0	0	0	0	0	0	0	0	0	0	0	0	0	0	0	0	23	0	0	100	782
ASV_410	Bacteria	Actinobacteriota	Thermoleophilia	Solirubrobacterales	Solirubrobacteraceae	Solirubrobacter	unclassified_Solirubrobacter	51	24	67	0	33	66	57	67	26	0	0	0	0	0	187	67	82	101	0	0	0	74	0	0	0	0
ASV_411	Bacteria	Proteobacteria	Gammaproteobacteria	Burkholderiales	Comamonadaceae	unclassified_Comamonadaceae	unclassified_Comamonadaceae	47	123	0	199	164	71	71	0	0	0	0	0	0	0	75	62	43	0	47	0	0	0	0	0	0	0
ASV_412	Bacteria	Actinobacteriota	Actinobacteria	Propionibacteriales	Nocardioidaceae	Nocardioides	dokdonensis	116	103	66	62	157	102	108	0	0	0	0	0	0	0	50	20	84	0	12	0	0	0	0	0	0	20
ASV_413	Bacteria	Actinobacteriota	Thermoleophilia	unclassified_Thermoleophilia	unclassified_Thermoleophilia	unclassified_Thermoleophilia	unclassified_Thermoleophilia	0	9	0	5	27	0	0	11	249	18	0	20	59	0	43	0	23	0	78	0	0	0	0	0	44	314
ASV_414	Bacteria	Gemmatimonadota	Gemmatimonadetes	Gemmatimonadales	Gemmatimonadaceae	Gemmatimonas	unclassified_Gemmatimonas	0	0	0	0	0	0	0	0	0	0	0	0	0	0	0	0	0	0	123	196	510	38	0	31	0	0
ASV_415	Bacteria	Chloroflexi	KD4-96	unclassified_KD4-96	unclassified_KD4-96	unclassified_KD4-96	unclassified_KD4-96	0	0	10	0	0	0	0	0	32	0	0	0	207	0	66	0	0	0	195	0	0	0	0	0	80	303
ASV_416	Bacteria	Deinococcota	Deinococci	Deinococcales	Trueperaceae	Truepera	unclassified_Truepera	0	0	0	0	0	23	0	23	0	0	0	0	0	0	139	0	0	41	0	32	0	0	0	624	3	8
ASV_417	Bacteria	Myxococcota	Polyangia	Polyangiales	Polyangiaceae	Pajaroellobacter	unclassified_Pajaroellobacter	0	30	37	36	0	0	0	47	0	0	417	43	65	0	0	52	66	0	0	0	0	43	0	0	0	56
ASV_418	Bacteria	Verrucomicrobiota	Verrucomicrobiae	Chthoniobacterales	Chthoniobacteraceae	Candidatus Udaeobacter	unclassified_Candidatus Udaeobacter	0	0	0	0	185	75	152	227	0	0	0	0	0	0	176	0	29	0	0	48	0	0	0	0	0	0
ASV_419	Bacteria	Actinobacteriota	Actinobacteria	Micrococcales	Microbacteriaceae	Lysinimonas	unclassified_Lysinimonas	0	0	0	0	0	0	0	0	121	0	0	341	283	147	0	0	0	0	0	0	0	0	0	0	0	0
ASV_420	Bacteria	Planctomycetota	vadinHA49	unclassified_vadinHA49	unclassified_vadinHA49	unclassified_vadinHA49	unclassified_vadinHA49	213	82	165	0	7	0	212	38	0	0	0	0	7	0	39	0	18	0	0	0	110	0	0	0	0	0
ASV_421	Bacteria	Actinobacteriota	Actinobacteria	Nitriliruptorales	Nitriliruptoraceae	Nitriliruptor	alkaliphilus	0	0	0	7	0	0	15	0	0	0	0	0	0	0	0	0	0	0	0	0	144	0	725	0	0	0
ASV_422	Bacteria	Bacteroidota	Bacteroidia	Cytophagales	MWH-CFBk5	unclassified_MWH-CFBk5	unclassified_MWH-CFBk5	0	0	0	0	0	0	0	0	0	0	0	0	0	0	0	0	0	0	0	79	0	0	0	811	0	0
ASV_423	Bacteria	Cyanobacteria	Cyanobacteriia	Cyanobacteriales	Nostocaceae	Nostoc PCC-73102	unclassified_Nostoc PCC-73102	0	0	108	155	0	0	53	14	0	0	0	0	85	0	426	0	0	0	45	0	0	0	0	0	0	0
ASV_424	Bacteria	Proteobacteria	Gammaproteobacteria	Burkholderiales	Oxalobacteraceae	unclassified_Oxalobacteraceae	unclassified_Oxalobacteraceae	0	46	0	77	0	0	0	21	0	0	126	184	58	139	0	0	35	0	0	0	0	0	0	0	0	195
ASV_425	Bacteria	Proteobacteria	Gammaproteobacteria	Pseudomonadales	Pseudomonadaceae	Pseudomonas	yamanorum	0	0	0	0	0	0	0	0	0	18	172	356	218	115	0	0	0	0	0	0	0	0	0	0	0	0
ASV_426	Archaea	Crenarchaeota	Nitrososphaeria	Nitrososphaerales	Nitrososphaeraceae	unclassified_Nitrososphaeraceae	unclassified_Nitrososphaeraceae	0	0	0	0	0	0	0	0	0	0	0	0	0	0	0	7	0	0	0	0	0	871	0	0	0	0
ASV_427	Bacteria	Actinobacteriota	Actinobacteria	Euzebyales	Euzebyaceae	Euzebya	unclassified_Euzebya	0	0	0	0	0	0	0	0	0	0	0	0	0	0	0	0	0	0	0	223	154	0	499	0	0	0
ASV_428	Bacteria	Actinobacteriota	Acidimicrobiia	Microtrichales	Iamiaceae	Iamia	unclassified_Iamia	0	0	0	0	0	0	0	0	0	0	0	0	0	0	0	0	0	0	0	90	24	0	735	24	0	0
ASV_429	Bacteria	Proteobacteria	Gammaproteobacteria	Burkholderiales	Oxalobacteraceae	Noviherbaspirillum	unclassified_Noviherbaspirillum	146	296	0	344	0	0	0	0	0	0	0	18	0	0	0	0	68	0	0	0	0	0	0	0	0	0
ASV_430	Bacteria	Bacteroidota	Bacteroidia	Chitinophagales	Chitinophagaceae	unclassified_Chitinophagaceae	unclassified_Chitinophagaceae	55	0	20	0	106	0	50	107	0	0	0	0	0	0	45	0	0	62	92	0	0	182	0	0	17	136
ASV_431	Bacteria	Bacteroidota	Bacteroidia	Flavobacteriales	Flavobacteriaceae	Maribacter	unclassified_Maribacter	0	3	0	0	0	0	0	0	0	0	0	0	0	0	0	0	0	0	0	0	862	0	0	0	0	0
ASV_432	Bacteria	Chloroflexi	Gitt-GS-136	unclassified_Gitt-GS-136	unclassified_Gitt-GS-136	unclassified_Gitt-GS-136	unclassified_Gitt-GS-136	0	0	25	0	0	0	0	0	0	0	0	0	0	0	464	0	0	0	124	44	0	207	0	0	0	0
ASV_433	Bacteria	Cyanobacteria	Cyanobacteriia	Cyanobacteriales	Nostocaceae	Nostoc PCC-73102	unclassified_Nostoc PCC-73102	0	0	529	78	0	46	189	0	0	0	0	0	0	0	0	0	0	0	0	0	0	0	0	0	0	21
ASV_434	Bacteria	Gemmatimonadota	Gemmatimonadetes	Gemmatimonadales	Gemmatimonadaceae	unclassified_Gemmatimonadaceae	unclassified_Gemmatimonadaceae	63	0	26	0	28	30	31	24	0	0	0	0	0	0	282	229	52	0	58	0	0	39	0	0	0	0
ASV_435	Bacteria	Bacteroidota	Bacteroidia	Flavobacteriales	Flavobacteriaceae	Antarcticibacterium	unclassified_Antarcticibacterium	26	0	0	0	0	0	0	0	0	0	0	0	0	0	39	0	0	0	89	62	536	0	103	0	0	0
ASV_436	Bacteria	Proteobacteria	Gammaproteobacteria	unclassified_Gammaproteobacteria	unclassified_Gammaproteobacteria	unclassified_Gammaproteobacteria	unclassified_Gammaproteobacteria	0	0	0	0	0	0	0	0	0	0	0	0	0	0	0	0	0	0	0	94	0	0	0	761	0	0
ASV_437	Bacteria	Bdellovibrionota	Oligoflexia	0319-6G20	unclassified_0319-6G20	unclassified_0319-6G20	unclassified_0319-6G20	104	0	16	84	41	52	33	0	37	0	0	0	19	0	0	0	467	0	0	0	0	0	0	0	0	0
ASV_439	Bacteria	Cyanobacteria	Vampirivibrionia	Obscuribacterales	Obscuribacteraceae	Candidatus Obscuribacter	unclassified_Candidatus Obscuribacter	0	0	0	0	0	0	0	0	0	0	737	114	0	0	0	0	0	0	0	0	0	0	0	0	0	0
ASV_440	Bacteria	Actinobacteriota	Acidimicrobiia	unclassified_Acidimicrobiia	unclassified_Acidimicrobiia	unclassified_Acidimicrobiia	unclassified_Acidimicrobiia	14	0	0	0	41	15	13	33	0	0	0	0	0	0	51	501	0	52	82	16	0	0	0	31	0	0
ASV_441	Bacteria	Actinobacteriota	Actinobacteria	Micrococcales	Intrasporangiaceae	Intrasporangium	calvum	0	20	0	39	0	0	85	56	0	0	0	0	0	0	241	0	0	100	121	120	0	0	0	53	0	0
ASV_442	Bacteria	Cyanobacteria	Cyanobacteriia	Cyanobacteriales	unclassified_Cyanobacteriales	unclassified_Cyanobacteriales	unclassified_Cyanobacteriales	0	0	0	0	0	0	458	61	0	0	0	0	0	0	10	302	4	0	0	0	0	0	0	0	0	0
ASV_443	Bacteria	Actinobacteriota	Acidimicrobiia	Actinomarinales	unclassified_Actinomarinales	unclassified_Actinomarinales	unclassified_Actinomarinales	77	0	59	0	148	0	48	82	52	0	0	0	0	0	25	0	74	80	106	26	0	29	0	0	24	0
ASV_444	Bacteria	Proteobacteria	Alphaproteobacteria	Micropepsales	Micropepsaceae	unclassified_Micropepsaceae	unclassified_Micropepsaceae	0	54	0	133	0	0	0	0	61	0	0	198	19	109	0	64	192	0	0	0	0	0	0	0	0	0
ASV_445	Bacteria	Actinobacteriota	Actinobacteria	Propionibacteriales	Nocardioidaceae	unclassified_Nocardioidaceae	unclassified_Nocardioidaceae	0	0	0	0	109	29	175	254	0	0	0	0	0	0	0	0	0	177	0	0	0	72	0	0	0	0
ASV_446	Bacteria	Verrucomicrobiota	Verrucomicrobiae	Chthoniobacterales	Chthoniobacteraceae	Candidatus Udaeobacter	unclassified_Candidatus Udaeobacter	0	0	0	0	0	0	0	0	0	0	0	0	0	0	561	228	26	0	0	0	0	0	0	0	0	0
ASV_447	Bacteria	Actinobacteriota	Thermoleophilia	Gaiellales	Gaiellaceae	Gaiella	unclassified_Gaiella	0	0	0	0	0	0	0	0	0	0	0	0	0	15	0	0	0	0	0	0	0	0	0	0	0	799
ASV_448	Bacteria	Proteobacteria	Gammaproteobacteria	Burkholderiales	Comamonadaceae	Polaromonas	unclassified_Polaromonas	0	0	0	0	0	0	0	0	0	0	0	0	0	0	0	0	0	0	0	0	0	0	0	0	0	814
ASV_449	Bacteria	Proteobacteria	Gammaproteobacteria	Burkholderiales	Comamonadaceae	Piscinibacter	unclassified_Piscinibacter	0	93	0	0	0	0	0	0	0	0	36	173	45	177	0	0	232	0	0	0	0	57	0	0	0	0
ASV_450	Archaea	Crenarchaeota	Nitrososphaeria	Nitrososphaerales	Nitrososphaeraceae	Candidatus Nitrocosmicus	unclassified_Candidatus Nitrocosmicus	0	0	0	0	0	0	0	0	0	0	0	0	0	0	0	0	0	812	0	0	0	0	0	0	0	0
ASV_451	Bacteria	Planctomycetota	Planctomycetes	Pirellulales	Pirellulaceae	Rhodopirellula	unclassified_Rhodopirellula	0	0	21	0	56	0	99	63	0	0	0	0	126	63	37	0	0	47	33	0	16	140	0	0	13	97
ASV_452	Bacteria	Proteobacteria	Alphaproteobacteria	Rhizobiales	Devosiaceae	unclassified_Devosiaceae	unclassified_Devosiaceae	43	41	0	106	0	0	0	0	72	18	54	246	91	22	13	11	92	0	0	0	0	0	0	0	0	0
ASV_453	Bacteria	Actinobacteriota	Actinobacteria	Glycomycetales	Glycomycetaceae	unclassified_Glycomycetaceae	unclassified_Glycomycetaceae	0	0	0	0	0	0	17	0	5	0	0	0	0	0	55	0	0	252	359	0	0	121	0	0	0	0
ASV_454	Bacteria	Proteobacteria	Alphaproteobacteria	Tistrellales	Geminicoccaceae	unclassified_Geminicoccaceae	unclassified_Geminicoccaceae	10	0	26	5	0	0	0	0	0	0	0	0	0	0	80	42	0	77	139	62	0	356	0	8	3	0
ASV_455	Bacteria	Bacteroidota	Bacteroidia	Cytophagales	Hymenobacteraceae	Hymenobacter	roseosalivarius	85	31	0	177	98	20	102	31	0	0	0	0	0	0	0	217	0	27	0	0	0	0	0	19	0	0
ASV_456	Bacteria	Bacteroidota	Bacteroidia	Chitinophagales	Chitinophagaceae	Ferruginibacter	unclassified_Ferruginibacter	58	55	0	348	0	0	42	48	0	0	0	0	0	0	33	49	130	16	28	0	0	0	0	0	0	0
ASV_457	Bacteria	Bacteroidota	Bacteroidia	Flavobacteriales	Flavobacteriaceae	Flavobacterium	unclassified_Flavobacterium	495	117	46	55	56	0	0	0	0	0	0	0	0	0	0	0	37	0	0	0	0	0	0	0	0	0
ASV_458	Bacteria	Bacteroidota	Bacteroidia	Cytophagales	Spirosomaceae	Spirosoma	unclassified_Spirosoma	0	0	0	0	0	0	0	0	686	19	36	65	0	0	0	0	0	0	0	0	0	0	0	0	0	0
ASV_459	Bacteria	Proteobacteria	Alphaproteobacteria	Rhizobiales	Rhizobiaceae	Mesorhizobium	ciceri	0	47	0	79	0	0	0	0	179	39	89	60	159	0	0	0	151	0	0	0	0	0	0	0	0	0
ASV_460	Bacteria	Acidobacteriota	Blastocatellia	Pyrinomonadales	Pyrinomonadaceae	RB41	unclassified_RB41	0	0	0	0	59	35	0	0	0	0	0	0	0	0	58	84	0	0	229	0	0	338	0	0	0	0
ASV_461	Bacteria	Actinobacteriota	Rubrobacteria	Rubrobacterales	Rubrobacteriaceae	Rubrobacter	unclassified_Rubrobacter	0	0	0	0	0	0	0	0	0	0	0	0	0	0	0	0	0	0	0	124	0	0	0	677	0	0
ASV_462	Bacteria	Verrucomicrobiota	Verrucomicrobiae	Pedosphaerales	Pedosphaeraceae	unclassified_Pedosphaeraceae	unclassified_Pedosphaeraceae	24	0	80	0	304	29	75	49	0	0	0	0	0	0	53	89	35	35	0	27	0	0	0	0	0	0
ASV_463	Bacteria	Acidobacteriota	Blastocatellia	Blastocatellales	Blastocatellaceae	Stenotrophobacter	unclassified_Stenotrophobacter	95	0	139	0	0	30	97	196	0	0	0	0	0	0	0	0	20	63	24	134	0	0	0	0	0	0
ASV_464	Bacteria	Actinobacteriota	Actinobacteria	Micrococcales	Micrococcaceae	Arthrobacter	unclassified_Arthrobacter	129	47	71	61	134	50	78	27	0	0	0	0	0	0	86	30	45	6	15	0	7	11	0	0	0	0
ASV_465	Bacteria	Verrucomicrobiota	Verrucomicrobiae	Chthoniobacterales	Chthoniobacteraceae	Chthoniobacter	unclassified_Chthoniobacter	0	0	0	0	0	0	0	16	0	0	0	0	0	0	0	0	0	243	0	0	0	0	0	0	0	537
ASV_466	Bacteria	Actinobacteriota	Actinobacteria	Propionibacteriales	Nocardioidaceae	unclassified_Nocardioidaceae	unclassified_Nocardioidaceae	0	0	0	0	0	0	0	0	0	0	0	0	0	0	0	0	0	0	0	203	55	0	94	441	0	0
ASV_467	Bacteria	Gemmatimonadota	Gemmatimonadetes	Gemmatimonadales	Gemmatimonadaceae	unclassified_Gemmatimonadaceae	unclassified_Gemmatimonadaceae	0	0	24	0	0	0	0	40	0	0	0	0	0	0	0	0	0	0	99	278	255	0	0	94	0	0
ASV_468	Bacteria	Chloroflexi	Anaerolineae	Ardenticatenales	Ardenticatenaceae	unclassified_Ardenticatenaceae	unclassified_Ardenticatenaceae	0	0	0	0	0	0	0	0	0	0	0	0	0	0	0	0	0	0	0	142	291	0	262	95	0	0
ASV_469	Bacteria	Bacteroidota	Bacteroidia	Chitinophagales	Chitinophagaceae	unclassified_Chitinophagaceae	unclassified_Chitinophagaceae	0	0	0	108	0	0	0	0	245	0	163	263	10	0	0	0	0	0	0	0	0	0	0	0	0	0
ASV_470	Bacteria	Proteobacteria	Gammaproteobacteria	Burkholderiales	Comamonadaceae	Pseudorhodoferax	unclassified_Pseudorhodoferax	0	0	0	0	0	0	0	0	0	0	758	0	20	0	0	0	0	0	0	0	0	0	0	0	0	0
ASV_471	Bacteria	Cyanobacteria	Cyanobacteriia	Cyanobacteriales	Phormidiaceae	Tychonema CCAP 1459-11B	unclassified_Tychonema CCAP 1459-11B	0	0	0	0	0	0	73	34	0	0	0	0	0	0	34	19	0	0	580	0	0	0	0	0	37	0
ASV_472	Bacteria	Actinobacteriota	Thermoleophilia	Solirubrobacterales	Solirubrobacteraceae	unclassified_Solirubrobacteraceae	unclassified_Solirubrobacteraceae	0	0	31	0	72	0	31	159	0	0	0	0	0	0	100	239	0	92	52	0	0	0	0	0	0	0
ASV_473	Bacteria	Bacteroidota	Bacteroidia	Chitinophagales	Chitinophagaceae	Ferruginibacter	unclassified_Ferruginibacter	0	0	0	0	19	0	0	0	0	0	493	133	126	0	0	0	0	0	0	0	0	0	0	0	0	0
ASV_474	Bacteria	Gemmatimonadota	Gemmatimonadetes	Gemmatimonadales	Gemmatimonadaceae	unclassified_Gemmatimonadaceae	unclassified_Gemmatimonadaceae	0	0	0	0	0	0	0	0	0	0	0	0	137	244	0	0	0	0	0	0	0	0	0	0	31	359
ASV_475	Bacteria	Gemmatimonadota	Longimicrobia	Longimicrobiales	Longimicrobiaceae	unclassified_Longimicrobiaceae	unclassified_Longimicrobiaceae	0	0	0	0	0	0	8	0	0	0	0	0	0	0	0	0	0	0	0	26	71	0	591	74	0	0
ASV_476	Bacteria	Actinobacteriota	Actinobacteria	Corynebacteriales	Nocardiaceae	Rhodococcus	corynebacterioides	0	0	0	0	0	0	0	0	0	0	12	296	36	409	0	0	0	0	0	0	0	0	0	0	0	17
ASV_477	Bacteria	Proteobacteria	Gammaproteobacteria	Burkholderiales	Rhodocyclaceae	Sulfuritalea	unclassified_Sulfuritalea	0	11	0	0	0	0	0	0	0	0	96	269	106	131	0	0	144	0	0	0	0	0	0	0	0	9
ASV_478	Bacteria	Actinobacteriota	Thermoleophilia	Solirubrobacterales	67-14	unclassified_67-14	unclassified_67-14	0	91	0	77	0	0	0	0	47	10	0	68	45	0	0	13	414	0	0	0	0	0	0	0	0	0
ASV_479	Bacteria	Proteobacteria	Gammaproteobacteria	Nitrosococcales	Nitrosococcaceae	SZB85	unclassified_SZB85	0	0	45	0	134	0	70	196	0	0	0	0	0	0	0	133	0	168	0	0	0	0	0	0	16	0
ASV_480	Bacteria	Proteobacteria	Gammaproteobacteria	Burkholderiales	A21b	unclassified_A21b	unclassified_A21b	0	0	0	0	0	0	0	0	0	0	0	0	75	0	0	39	0	0	60	0	0	168	0	0	24	395
ASV_481	Bacteria	Proteobacteria	Gammaproteobacteria	Burkholderiales	Comamonadaceae	Ramlibacter	unclassified_Ramlibacter	73	0	47	0	42	0	137	0	0	0	0	46	106	35	159	0	0	0	33	58	0	0	22	0	0	0
ASV_482	Bacteria	Proteobacteria	Gammaproteobacteria	Burkholderiales	Oxalobacteraceae	unclassified_Oxalobacteraceae	unclassified_Oxalobacteraceae	0	48	0	0	0	0	0	0	0	0	620	90	0	0	0	0	0	0	0	0	0	0	0	0	0	0
ASV_483	Bacteria	Actinobacteriota	Actinobacteria	Frankiales	Sporichthyaceae	unclassified_Sporichthyaceae	unclassified_Sporichthyaceae	0	0	24	0	30	55	74	0	0	0	0	0	411	0	126	33	0	0	0	0	0	0	0	0	0	0
ASV_484	Bacteria	Deinococcota	Deinococci	Deinococcales	Trueperaceae	Truepera	unclassified_Truepera	0	0	0	0	0	0	0	0	0	0	0	0	0	0	0	0	0	0	0	56	0	0	44	653	0	0
ASV_485	Bacteria	Proteobacteria	Alphaproteobacteria	Sphingomonadales	Sphingomonadaceae	Sphingomonas	faeni	69	62	54	281	112	38	13	0	25	0	0	12	63	0	0	0	22	0	0	0	0	0	0	0	0	0
ASV_486	Bacteria	Actinobacteriota	Rubrobacteria	Rubrobacterales	Rubrobacteriaceae	Rubrobacter	unclassified_Rubrobacter	0	0	0	0	0	0	0	0	0	0	0	0	0	0	0	0	0	0	0	0	0	0	749	0	0	0
ASV_487	Bacteria	Actinobacteriota	Thermoleophilia	Solirubrobacterales	unclassified_Solirubrobacterales	unclassified_Solirubrobacterales	unclassified_Solirubrobacterales	23	0	74	0	106	34	55	159	18	0	0	0	0	0	0	0	0	0	0	0	0	0	0	0	47	231
ASV_488	Bacteria	Gemmatimonadota	Longimicrobia	Longimicrobiales	Longimicrobiaceae	unclassified_Longimicrobiaceae	unclassified_Longimicrobiaceae	0	0	0	0	0	0	0	0	0	0	0	0	0	0	0	0	0	0	0	0	0	0	747	0	0	0
ASV_489	Bacteria	Actinobacteriota	Acidimicrobiia	Microtrichales	Ilumatobacteraceae	unclassified_Ilumatobacteraceae	unclassified_Ilumatobacteraceae	47	0	27	200	72	11	68	55	0	0	0	0	0	0	27	76	45	34	57	0	0	9	0	6	0	0
ASV_490	Bacteria	Planctomycetota	Phycisphaerae	Tepidisphaerales	WD2101 soil group	unclassified_WD2101 soil group	unclassified_WD2101 soil group	0	0	0	19	0	7	37	19	0	0	0	0	0	0	0	0	85	0	0	252	0	0	0	314	0	0
ASV_491	Bacteria	Proteobacteria	Gammaproteobacteria	Pseudomonadales	Halomonadaceae	Halomonas	korlensis	0	0	0	0	0	0	0	0	0	0	0	0	0	0	0	0	0	0	0	0	0	0	731	0	0	0
ASV_492	Bacteria	Actinobacteriota	Actinobacteria	Frankiales	unclassified_Frankiales	unclassified_Frankiales	unclassified_Frankiales	0	0	21	0	82	73	87	177	0	0	0	0	0	0	86	0	0	61	89	20	0	26	0	8	0	0
ASV_493	Bacteria	Acidobacteriota	Blastocatellia	Blastocatellales	Blastocatellaceae	Blastocatella	unclassified_Blastocatella	19	0	0	0	109	0	201	160	0	0	0	0	0	0	0	32	0	176	0	0	0	0	0	32	0	0
ASV_494	Bacteria	Proteobacteria	Gammaproteobacteria	Nitrosococcales	Nitrosococcaceae	wb1-P19	unclassified_wb1-P19	162	0	0	0	562	0	0	0	0	0	0	0	0	0	0	0	0	0	0	0	0	0	0	0	0	0
ASV_495	Bacteria	Actinobacteriota	Actinobacteria	Frankiales	unclassified_Frankiales	unclassified_Frankiales	unclassified_Frankiales	0	0	0	0	16	42	22	39	0	0	0	0	0	0	26	0	0	11	0	160	0	0	0	407	0	0
ASV_496	Bacteria	Chloroflexi	KD4-96	unclassified_KD4-96	unclassified_KD4-96	unclassified_KD4-96	unclassified_KD4-96	0	0	0	0	0	0	0	0	0	0	0	0	0	0	0	0	0	0	0	150	0	0	0	572	0	0
ASV_497	Bacteria	Actinobacteriota	Acidimicrobiia	Actinomarinales	unclassified_Actinomarinales	unclassified_Actinomarinales	unclassified_Actinomarinales	0	0	0	0	0	0	0	0	0	0	0	0	0	0	0	0	0	0	0	16	340	0	363	0	0	0
ASV_498	Bacteria	Proteobacteria	Alphaproteobacteria	Sphingomonadales	Sphingomonadaceae	Sphingomonas	unclassified_Sphingomonas	0	0	0	0	0	0	0	0	0	0	0	0	0	0	0	0	0	0	0	0	0	0	719	0	0	0
ASV_499	Bacteria	Proteobacteria	Gammaproteobacteria	Burkholderiales	Oxalobacteraceae	Noviherbaspirillum	unclassified_Noviherbaspirillum	99	193	87	283	0	0	0	0	0	0	0	0	0	0	0	0	56	0	0	0	0	0	0	0	0	0
ASV_500	Bacteria	Actinobacteriota	Thermoleophilia	Gaiellales	Gaiellaceae	Gaiella	unclassified_Gaiella	21	0	27	0	55	0	55	90	0	0	0	0	20	0	97	0	0	0	0	92	0	0	0	0	42	216
ASV_501	Bacteria	Actinobacteriota	Thermoleophilia	Solirubrobacterales	Solirubrobacteraceae	Conexibacter	unclassified_Conexibacter	0	0	0	0	0	0	0	0	0	0	0	0	0	0	0	0	0	0	0	103	58	0	380	174	0	0
ASV_502	Bacteria	Proteobacteria	Alphaproteobacteria	Rhizobiales	Xanthobacteraceae	Pseudorhodoplanes	unclassified_Pseudorhodoplanes	0	0	0	0	0	0	0	0	0	0	0	0	374	187	0	0	0	0	0	0	0	0	0	0	0	150
ASV_503	Bacteria	Acidobacteriota	Vicinamibacteria	Vicinamibacterales	unclassified_Vicinamibacterales	unclassified_Vicinamibacterales	unclassified_Vicinamibacterales	0	0	0	0	0	0	0	0	0	0	0	0	0	0	0	66	0	60	32	0	0	297	0	0	0	256
ASV_504	Bacteria	Chloroflexi	KD4-96	unclassified_KD4-96	unclassified_KD4-96	unclassified_KD4-96	unclassified_KD4-96	0	0	0	0	0	0	0	0	0	0	0	0	0	0	0	0	0	0	0	75	411	0	172	53	0	0
ASV_505	Bacteria	Chloroflexi	KD4-96	unclassified_KD4-96	unclassified_KD4-96	unclassified_KD4-96	unclassified_KD4-96	0	0	16	0	0	0	0	151	0	0	0	0	0	0	0	205	0	320	0	0	0	18	0	0	0	0
ASV_506	Bacteria	Proteobacteria	Gammaproteobacteria	Pseudomonadales	Pseudomonadaceae	Pseudomonas	unclassified_Pseudomonas	0	0	0	0	0	0	0	0	0	0	98	208	226	178	0	0	0	0	0	0	0	0	0	0	0	0
ASV_507	Bacteria	Bacteroidota	Bacteroidia	Chitinophagales	Chitinophagaceae	Ferruginibacter	unclassified_Ferruginibacter	141	178	0	113	0	0	0	0	0	0	0	0	0	0	0	0	275	0	0	0	0	0	0	0	0	0
ASV_508	Bacteria	Proteobacteria	Gammaproteobacteria	Pseudomonadales	Pseudomonadaceae	Pseudomonas	frederiksbergensis	0	0	0	0	0	0	0	0	0	0	0	0	303	402	0	0	0	0	0	0	0	0	0	0	0	0
ASV_509	Bacteria	Proteobacteria	Gammaproteobacteria	unclassified_Gammaproteobacteria	unclassified_Gammaproteobacteria	unclassified_Gammaproteobacteria	unclassified_Gammaproteobacteria	0	0	0	0	0	0	0	0	0	0	0	0	0	0	0	0	0	0	0	0	640	0	65	0	0	0
ASV_510	Bacteria	Bacteroidota	Bacteroidia	Flavobacteriales	Flavobacteriaceae	Flavobacterium	unclassified_Flavobacterium	200	241	16	0	88	74	0	0	0	0	0	0	0	0	0	0	85	0	0	0	0	0	0	0	0	0
ASV_511	Bacteria	Acidobacteriota	Blastocatellia	Blastocatellales	Blastocatellaceae	Blastocatella	unclassified_Blastocatella	94	94	52	81	0	0	0	0	0	0	0	0	0	0	50	70	66	71	73	0	0	49	0	0	0	0
ASV_512	Bacteria	Actinobacteriota	Thermoleophilia	Solirubrobacterales	Solirubrobacteraceae	Solirubrobacter	unclassified_Solirubrobacter	0	0	0	0	83	0	52	271	0	0	0	0	0	0	0	0	0	0	0	293	0	0	0	0	0	0
ASV_513	Bacteria	Planctomycetota	vadinHA49	unclassified_vadinHA49	unclassified_vadinHA49	unclassified_vadinHA49	unclassified_vadinHA49	40	29	142	0	0	0	19	119	3	0	16	18	0	0	21	0	38	33	96	0	74	42	0	0	8	0
ASV_514	Bacteria	Bacteroidota	Bacteroidia	Sphingobacteriales	env.OPS 17	unclassified_env.OPS 17	unclassified_env.OPS 17	116	46	19	31	87	28	28	61	0	0	0	0	0	25	107	23	58	36	20	12	0	0	0	0	0	0
ASV_515	Bacteria	Bacteroidota	Bacteroidia	Cytophagales	Cyclobacteriaceae	Anditalea	unclassified_Anditalea	0	0	0	0	0	0	0	0	0	0	0	0	0	0	0	0	0	0	0	97	229	0	371	0	0	0
ASV_516	Bacteria	Proteobacteria	Gammaproteobacteria	Burkholderiales	Comamonadaceae	unclassified_Comamonadaceae	unclassified_Comamonadaceae	17	0	0	0	18	0	26	0	0	0	37	0	598	0	0	0	0	0	0	0	0	0	0	0	0	0
ASV_517	Bacteria	Actinobacteriota	Actinobacteria	Pseudonocardiales	Pseudonocardiaceae	Pseudonocardia	unclassified_Pseudonocardia	0	0	0	0	0	0	0	0	0	0	0	0	0	0	0	0	0	30	594	0	0	70	0	0	0	0
ASV_518	Bacteria	Bacteroidota	Bacteroidia	Cytophagales	Hymenobacteraceae	Hymenobacter	unclassified_Hymenobacter	0	0	0	668	0	0	0	0	0	0	0	0	0	0	0	24	0	0	0	0	0	0	0	0	0	0
ASV_519	Bacteria	Chloroflexi	TK10	unclassified_TK10	unclassified_TK10	unclassified_TK10	unclassified_TK10	0	0	21	16	50	17	0	29	0	0	0	0	314	17	68	57	34	35	0	0	0	31	0	0	0	0
ASV_520	Bacteria	Proteobacteria	Gammaproteobacteria	Xanthomonadales	Xanthomonadaceae	Arenimonas	unclassified_Arenimonas	0	21	0	44	0	0	0	0	64	0	118	110	167	101	0	0	62	0	0	0	0	0	0	0	0	0
ASV_521	Bacteria	Acidobacteriota	Acidobacteriae	Bryobacterales	Bryobacteraceae	Bryobacter	unclassified_Bryobacter	0	0	88	45	38	45	60	25	0	0	0	0	0	0	117	167	75	13	0	7	0	0	0	0	0	0
ASV_522	Bacteria	Proteobacteria	Alphaproteobacteria	Sphingomonadales	Sphingomonadaceae	Sphingomonas	jaspsi	0	0	0	0	0	0	0	0	0	0	0	0	0	0	0	0	0	0	0	257	0	0	0	420	0	0
ASV_524	Bacteria	Proteobacteria	Gammaproteobacteria	Burkholderiales	Comamonadaceae	Polaromonas	unclassified_Polaromonas	0	0	0	0	0	0	0	0	0	0	0	0	0	0	0	0	0	0	0	0	0	0	0	0	0	669
ASV_525	Bacteria	Bacteroidota	Bacteroidia	Flavobacteriales	Crocinitomicaceae	Fluviicola	unclassified_Fluviicola	49	63	0	20	29	0	37	9	0	0	0	0	0	8	0	0	419	0	0	0	0	28	0	0	0	6
ASV_526	Bacteria	Acidobacteriota	Blastocatellia	Blastocatellales	Blastocatellaceae	Blastocatella	unclassified_Blastocatella	93	0	30	0	162	71	79	36	0	0	0	0	0	0	135	0	60	0	0	0	0	0	0	0	0	0
ASV_527	Bacteria	Actinobacteriota	Actinobacteria	Euzebyales	Euzebyaceae	unclassified_Euzebyaceae	unclassified_Euzebyaceae	0	0	0	0	0	0	0	0	0	0	0	0	0	0	0	0	0	0	0	0	0	0	666	0	0	0
ASV_529	Bacteria	Gemmatimonadota	Gemmatimonadetes	Gemmatimonadales	Gemmatimonadaceae	unclassified_Gemmatimonadaceae	unclassified_Gemmatimonadaceae	46	0	42	0	62	0	93	74	0	0	0	75	0	0	0	0	0	118	146	0	0	0	0	0	0	0
ASV_530	Bacteria	Bacteroidota	Bacteroidia	Cytophagales	Cyclobacteriaceae	Algoriphagus	unclassified_Algoriphagus	32	23	0	5	14	0	12	0	0	0	0	0	0	0	98	0	36	0	377	0	0	49	0	0	9	0
ASV_531	Bacteria	Chloroflexi	KD4-96	unclassified_KD4-96	unclassified_KD4-96	unclassified_KD4-96	unclassified_KD4-96	0	0	0	57	0	0	0	0	0	12	0	60	0	0	66	350	0	44	0	0	0	0	0	0	0	66
ASV_532	Bacteria	Chloroflexi	Anaerolineae	Caldilineales	Caldilineaceae	unclassified_Caldilineaceae	unclassified_Caldilineaceae	0	0	95	0	0	0	26	39	0	0	0	0	0	0	123	0	12	0	42	160	58	0	25	73	0	0
ASV_533	Bacteria	Proteobacteria	Gammaproteobacteria	Xanthomonadales	Rhodanobacteraceae	Dokdonella	unclassified_Dokdonella	0	0	0	0	0	18	24	18	0	0	0	0	0	0	541	0	0	0	43	0	0	0	0	0	9	0
ASV_534	Bacteria	Bacteroidota	Bacteroidia	Chitinophagales	Saprospiraceae	unclassified_Saprospiraceae	unclassified_Saprospiraceae	0	0	0	0	0	0	0	0	0	0	39	172	248	173	0	0	0	0	0	0	0	0	0	0	0	21
ASV_535	Bacteria	Bacteroidota	Bacteroidia	Chitinophagales	Chitinophagaceae	Flavitalea	unclassified_Flavitalea	0	81	0	51	0	0	0	0	0	0	38	94	132	118	0	0	135	0	0	0	0	0	0	0	0	0
ASV_536	Bacteria	Abditibacteriota	Abditibacteria	Abditibacteriales	Abditibacteriaceae	Abditibacterium	utsteinense	57	0	10	122	23	0	35	0	0	0	0	0	26	0	66	32	8	20	13	35	0	0	0	199	0	0
ASV_537	Bacteria	Bacteroidota	Bacteroidia	Cytophagales	Spirosomaceae	Spirosoma	luteum	300	14	21	162	38	25	61	0	0	0	0	0	0	0	0	0	24	0	0	0	0	0	0	0	0	0
ASV_538	Bacteria	Proteobacteria	Alphaproteobacteria	Rhizobiales	Beijerinckiaceae	Salinarimonas	unclassified_Salinarimonas	0	0	0	0	0	0	30	0	0	0	0	0	0	0	0	0	5	0	0	0	277	0	333	0	0	0
ASV_539	Bacteria	Desulfobacterota	Desulfuromonadia	Bradymonadales	Bradymonadaceae	unclassified_Bradymonadaceae	unclassified_Bradymonadaceae	0	0	0	0	0	0	0	0	0	0	0	0	0	0	0	0	0	0	0	0	157	0	488	0	0	0
ASV_540	Bacteria	Proteobacteria	Alphaproteobacteria	Sphingomonadales	Sphingomonadaceae	unclassified_Sphingomonadaceae	unclassified_Sphingomonadaceae	0	0	0	0	0	0	0	0	295	71	112	166	0	0	0	0	0	0	0	0	0	0	0	0	0	0
ASV_541	Bacteria	Cyanobacteria	Cyanobacteriia	Phormidesmiales	Phormidesmiaceae	Phormidesmis ANT.LACV5.1	unclassified_Phormidesmis ANT.LACV5.1	0	0	87	57	0	0	194	0	0	24	0	0	0	0	0	0	16	24	100	0	0	140	0	0	0	0
ASV_542	Bacteria	Bacteroidota	Bacteroidia	Sphingobacteriales	env.OPS 17	unclassified_env.OPS 17	unclassified_env.OPS 17	0	0	0	0	0	0	0	0	640	0	0	0	0	0	0	0	0	0	0	0	0	0	0	0	0	0
ASV_543	Bacteria	Chloroflexi	Chloroflexia	Kallotenuales	AKIW781	unclassified_AKIW781	unclassified_AKIW781	172	51	0	87	89	32	0	0	0	0	0	0	0	0	57	93	57	0	0	0	0	0	0	0	0	0
ASV_544	Bacteria	Proteobacteria	Alphaproteobacteria	Rhizobiales	Xanthobacteraceae	Tardiphaga	unclassified_Tardiphaga	0	0	0	0	0	0	0	0	53	0	471	114	0	0	0	0	0	0	0	0	0	0	0	0	0	0
ASV_545	Bacteria	Verrucomicrobiota	Verrucomicrobiae	Chthoniobacterales	Chthoniobacteraceae	Chthoniobacter	unclassified_Chthoniobacter	0	0	0	0	0	0	0	0	0	0	0	0	0	0	0	0	0	0	0	0	0	559	0	0	0	79
ASV_546	Bacteria	Verrucomicrobiota	Verrucomicrobiae	Opitutales	Opitutaceae	Opitutus	unclassified_Opitutus	0	138	0	71	0	0	0	0	0	0	0	0	0	0	0	0	428	0	0	0	0	0	0	0	0	0
ASV_547	Bacteria	Proteobacteria	Gammaproteobacteria	Gammaproteobacteria Incertae Sedis	Unknown Family	Candidatus Ovatusbacter	unclassified_Candidatus Ovatusbacter	4	583	29	0	0	0	0	11	0	0	0	0	9	0	0	0	0	0	0	0	0	0	0	0	0	0
ASV_548	Bacteria	Bacteroidota	Bacteroidia	Sphingobacteriales	Sphingobacteriaceae	Mucilaginibacter	unclassified_Mucilaginibacter	0	0	0	0	0	0	0	0	521	0	56	59	0	0	0	0	0	0	0	0	0	0	0	0	0	0
ASV_549	Bacteria	Verrucomicrobiota	Verrucomicrobiae	Chthoniobacterales	Chthoniobacteraceae	Candidatus Udaeobacter	unclassified_Candidatus Udaeobacter	26	0	0	0	0	0	0	106	0	0	0	0	0	0	185	252	0	66	0	0	0	0	0	0	0	0
ASV_550	Bacteria	Actinobacteriota	Actinobacteria	Pseudonocardiales	Pseudonocardiaceae	Pseudonocardia	unclassified_Pseudonocardia	0	0	0	0	10	133	0	116	0	0	0	0	0	0	69	189	15	27	0	62	0	0	0	14	0	0
ASV_551	Bacteria	Chloroflexi	KD4-96	unclassified_KD4-96	unclassified_KD4-96	unclassified_KD4-96	unclassified_KD4-96	20	0	18	0	115	0	47	85	0	0	0	0	24	0	63	100	0	58	71	0	0	33	0	0	0	0
ASV_552	Bacteria	Gemmatimonadota	Gemmatimonadetes	Gemmatimonadales	Gemmatimonadaceae	unclassified_Gemmatimonadaceae	unclassified_Gemmatimonadaceae	0	0	0	0	0	0	73	52	0	0	0	0	0	0	122	92	0	0	107	0	0	0	0	0	0	188
ASV_553	Bacteria	Verrucomicrobiota	Verrucomicrobiae	Chthoniobacterales	Chthoniobacteraceae	Chthoniobacter	unclassified_Chthoniobacter	23	0	18	11	80	14	26	29	0	0	0	0	0	0	269	90	10	62	0	0	0	0	0	0	0	0
ASV_554	Bacteria	Verrucomicrobiota	Verrucomicrobiae	Chthoniobacterales	Chthoniobacteraceae	Candidatus Udaeobacter	unclassified_Candidatus Udaeobacter	0	0	0	0	108	0	75	94	0	0	0	0	0	0	120	34	0	0	139	62	0	0	0	0	0	0
ASV_555	Bacteria	Verrucomicrobiota	Verrucomicrobiae	Chthoniobacterales	Chthoniobacteraceae	Chthoniobacter	unclassified_Chthoniobacter	0	0	21	0	148	0	0	0	0	0	0	0	0	0	99	110	0	0	0	0	0	86	0	0	33	133
ASV_556	Bacteria	Deinococcota	Deinococci	Deinococcales	Trueperaceae	Truepera	unclassified_Truepera	0	0	0	0	10	0	0	0	0	0	0	0	0	0	38	0	0	0	0	90	20	0	47	424	0	0
ASV_557	Bacteria	Proteobacteria	Alphaproteobacteria	unclassified_Alphaproteobacteria	unclassified_Alphaproteobacteria	unclassified_Alphaproteobacteria	unclassified_Alphaproteobacteria	0	0	0	0	0	0	0	0	0	0	0	0	0	0	0	0	0	0	0	0	0	0	629	0	0	0
ASV_558	Bacteria	Proteobacteria	Gammaproteobacteria	Burkholderiales	Comamonadaceae	Polaromonas	unclassified_Polaromonas	0	0	0	0	0	0	0	0	0	0	0	0	0	0	0	0	0	0	0	0	0	0	0	0	0	627
ASV_559	Bacteria	Actinobacteriota	Acidimicrobiia	unclassified_Acidimicrobiia	unclassified_Acidimicrobiia	unclassified_Acidimicrobiia	unclassified_Acidimicrobiia	0	0	0	0	75	0	0	83	0	0	0	0	0	0	85	126	0	0	137	93	0	0	0	0	0	27
ASV_560	Bacteria	Actinobacteriota	Thermoleophilia	Solirubrobacterales	Solirubrobacteraceae	Solirubrobacter	unclassified_Solirubrobacter	12	0	0	0	81	0	0	32	39	0	0	0	0	0	89	148	41	25	45	48	0	45	0	19	0	0
ASV_561	Bacteria	Planctomycetota	Planctomycetes	Gemmatales	Gemmataceae	Fimbriiglobus	unclassified_Fimbriiglobus	11	12	20	22	25	10	39	54	0	0	0	0	0	0	74	176	62	49	29	41	0	0	0	0	0	0
ASV_562	Bacteria	Acidobacteriota	Vicinamibacteria	Vicinamibacterales	unclassified_Vicinamibacterales	unclassified_Vicinamibacterales	unclassified_Vicinamibacterales	0	0	0	0	0	0	0	95	0	0	0	0	0	0	0	0	0	216	100	0	0	78	0	0	0	135
ASV_563	Bacteria	NB1-j	unclassified_NB1-j	unclassified_NB1-j	unclassified_NB1-j	unclassified_NB1-j	unclassified_NB1-j	0	0	0	0	0	0	0	0	0	0	0	0	0	0	0	0	0	0	4	0	620	0	0	0	0	0
ASV_564	Bacteria	Acidobacteriota	Blastocatellia	Blastocatellales	Blastocatellaceae	Blastocatella	unclassified_Blastocatella	0	0	0	0	15	0	14	45	0	0	0	0	0	0	0	0	0	33	22	418	0	0	0	74	0	0
ASV_565	Bacteria	Bacteroidota	Bacteroidia	Cytophagales	MWH-CFBk5	unclassified_MWH-CFBk5	unclassified_MWH-CFBk5	9	0	0	0	0	0	0	0	0	0	0	0	0	0	0	0	0	0	0	169	0	0	0	440	0	0
ASV_566	Bacteria	Proteobacteria	Gammaproteobacteria	Burkholderiales	Comamonadaceae	Polaromonas	unclassified_Polaromonas	0	0	0	0	0	0	0	0	127	0	0	0	346	85	0	0	0	0	60	0	0	0	0	0	0	0
ASV_567	Bacteria	Actinobacteriota	Actinobacteria	Kineosporiales	Kineosporiaceae	Kineosporia	unclassified_Kineosporia	0	20	37	429	0	0	0	0	0	0	0	59	48	0	0	0	24	0	0	0	0	0	0	0	0	0
ASV_568	Bacteria	Actinobacteriota	Thermoleophilia	Solirubrobacterales	67-14	unclassified_67-14	unclassified_67-14	0	0	16	0	0	11	0	43	0	0	0	0	0	0	223	0	0	57	140	127	0	0	0	0	0	0
ASV_569	Bacteria	Actinobacteriota	Thermoleophilia	Solirubrobacterales	67-14	unclassified_67-14	unclassified_67-14	36	0	40	16	112	26	61	105	43	0	0	0	0	0	0	0	30	19	29	64	0	0	0	0	19	16
ASV_570	Bacteria	Methylomirabilota	Methylomirabilia	Rokubacteriales	unclassified_Rokubacteriales	unclassified_Rokubacteriales	unclassified_Rokubacteriales	3	0	0	0	0	0	0	0	0	0	0	0	0	0	3	0	0	0	53	0	0	36	0	0	58	463
ASV_571	Bacteria	Chloroflexi	Anaerolineae	SBR1031	A4b	unclassified_A4b	unclassified_A4b	8	0	27	3	5	0	40	115	0	0	0	0	0	0	0	0	0	62	291	0	0	46	0	18	0	0
ASV_572	Bacteria	Actinobacteriota	Thermoleophilia	Solirubrobacterales	67-14	unclassified_67-14	unclassified_67-14	0	0	0	0	0	0	0	0	0	0	0	0	0	0	0	0	0	0	48	0	0	564	0	0	0	0
ASV_573	Bacteria	Acidobacteriota	Holophagae	Subgroup 7	unclassified_Subgroup 7	unclassified_Subgroup 7	unclassified_Subgroup 7	0	0	0	0	0	0	0	0	0	0	0	0	0	0	0	0	0	0	0	89	449	0	10	62	0	0
ASV_574	Bacteria	Bacteroidota	Rhodothermia	Rhodothermales	Rhodothermaceae	unclassified_Rhodothermaceae	unclassified_Rhodothermaceae	0	0	18	0	0	5	12	31	0	0	0	0	0	0	171	0	0	3	77	0	179	91	0	22	0	0
ASV_575	Bacteria	Bacteroidota	Bacteroidia	Chitinophagales	Chitinophagaceae	Ferruginibacter	unclassified_Ferruginibacter	0	148	0	232	0	0	0	0	0	22	0	128	0	0	0	0	68	9	0	0	0	0	0	0	0	0
ASV_576	Bacteria	Acidobacteriota	Blastocatellia	Blastocatellales	Blastocatellaceae	Blastocatella	unclassified_Blastocatella	0	0	0	0	0	18	0	113	0	0	0	0	0	0	96	68	25	69	78	140	0	0	0	0	0	0
ASV_577	Bacteria	Bacteroidota	Rhodothermia	Rhodothermales	Rhodothermaceae	unclassified_Rhodothermaceae	unclassified_Rhodothermaceae	0	0	0	0	0	0	0	0	0	0	0	0	0	0	0	0	0	0	0	0	0	0	607	0	0	0
ASV_578	Bacteria	Bacteroidota	Bacteroidia	Cytophagales	Spirosomaceae	Spirosoma	spitsbergense	55	109	0	382	21	0	0	0	0	0	0	19	20	0	0	0	0	0	0	0	0	0	0	0	0	0
ASV_579	Bacteria	Acidobacteriota	Holophagae	Subgroup 7	unclassified_Subgroup 7	unclassified_Subgroup 7	unclassified_Subgroup 7	0	0	0	0	0	0	0	0	0	0	0	0	19	40	0	0	0	0	0	0	0	252	0	0	0	294
ASV_580	Bacteria	Proteobacteria	Gammaproteobacteria	Pseudomonadales	Pseudomonadaceae	Pseudomonas	lini	0	0	0	0	0	0	0	0	0	0	0	0	298	306	0	0	0	0	0	0	0	0	0	0	0	0
ASV_581	Bacteria	Actinobacteriota	Actinobacteria	Euzebyales	Euzebyaceae	unclassified_Euzebyaceae	unclassified_Euzebyaceae	0	0	0	0	0	0	0	0	0	0	0	0	0	0	0	0	0	0	0	0	602	0	0	0	0	0
ASV_582	Bacteria	Proteobacteria	Alphaproteobacteria	Reyranellales	Reyranellaceae	Reyranella	unclassified_Reyranella	28	71	0	0	0	0	0	0	50	103	0	120	33	0	0	0	192	0	0	0	0	0	0	0	0	0
ASV_583	Bacteria	Bacteroidota	Bacteroidia	Chitinophagales	Chitinophagaceae	Segetibacter	unclassified_Segetibacter	181	0	153	0	0	28	0	0	0	0	0	0	0	0	231	0	0	0	0	0	0	0	0	0	0	0
ASV_584	Bacteria	Proteobacteria	Alphaproteobacteria	Sphingomonadales	Sphingomonadaceae	Sphingomonas	unclassified_Sphingomonas	0	0	0	0	0	0	0	0	158	0	335	100	0	0	0	0	0	0	0	0	0	0	0	0	0	0
ASV_585	Bacteria	Cyanobacteria	Cyanobacteriia	Cyanobacteriales	Nostocaceae	Nodularia PCC-9350	unclassified_Nodularia PCC-9350	0	0	0	0	0	0	0	0	0	0	0	0	0	0	0	0	0	0	0	0	592	0	0	0	0	0
ASV_586	Bacteria	Bacteroidota	Bacteroidia	Flavobacteriales	NS9 marine group	unclassified_NS9 marine group	unclassified_NS9 marine group	0	0	0	0	0	0	23	41	0	0	0	0	0	0	48	0	0	0	0	273	16	0	94	96	0	0
ASV_587	Bacteria	Actinobacteriota	MB-A2-108	unclassified_MB-A2-108	unclassified_MB-A2-108	unclassified_MB-A2-108	unclassified_MB-A2-108	0	0	0	0	38	19	27	79	0	0	0	0	0	0	142	15	0	74	44	0	0	152	0	0	0	0
ASV_588	Bacteria	Planctomycetota	Planctomycetes	Gemmatales	Gemmataceae	Gemmata	unclassified_Gemmata	0	184	0	36	0	0	0	0	0	0	9	182	0	0	0	0	174	0	0	0	0	0	0	0	0	0
ASV_589	Bacteria	Proteobacteria	Gammaproteobacteria	Xanthomonadales	Xanthomonadaceae	Luteimonas	unclassified_Luteimonas	0	0	0	97	0	0	70	43	0	0	0	0	70	0	216	29	0	56	0	0	0	0	0	0	0	0
ASV_590	Bacteria	Acidobacteriota	Blastocatellia	Blastocatellales	Blastocatellaceae	Blastocatella	unclassified_Blastocatella	0	0	0	11	22	0	23	46	0	0	0	0	0	0	20	0	0	52	89	122	0	0	0	195	0	0
ASV_591	Bacteria	Verrucomicrobiota	Verrucomicrobiae	Chthoniobacterales	Chthoniobacteraceae	Candidatus Udaeobacter	unclassified_Candidatus Udaeobacter	50	0	0	0	175	91	231	0	0	0	0	0	0	0	0	0	0	32	0	0	0	0	0	0	0	0
ASV_592	Bacteria	Myxococcota	Polyangia	Haliangiales	Haliangiaceae	Haliangium	unclassified_Haliangium	13	43	0	27	0	0	24	0	49	0	172	30	59	23	0	0	115	0	0	0	0	0	0	0	0	23
ASV_593	Bacteria	Actinobacteriota	Actinobacteria	Micrococcales	Cellulomonadaceae	Cellulomonas	unclassified_Cellulomonas	0	0	0	0	0	0	0	0	0	0	455	88	33	0	0	0	0	0	0	0	0	0	0	0	0	0
ASV_594	Bacteria	Deinococcota	Deinococci	Deinococcales	Trueperaceae	Truepera	unclassified_Truepera	86	27	94	111	59	31	50	33	0	0	0	0	0	0	52	0	0	0	0	0	0	26	0	0	0	0
ASV_595	Bacteria	Proteobacteria	Alphaproteobacteria	Rhizobiales	Rhizobiales Incertae Sedis	Bauldia	unclassified_Bauldia	0	0	0	0	0	0	0	0	64	33	0	173	147	60	0	0	84	0	0	0	0	0	0	0	8	0
ASV_596	Bacteria	Cyanobacteria	Cyanobacteriia	Cyanobacteriales	Chroococcidiopsaceae	Aliterella	unclassified_Aliterella	50	7	27	131	0	0	83	21	0	0	0	0	0	0	45	117	0	0	35	4	0	37	0	9	0	0
ASV_597	Bacteria	Bacteroidota	Bacteroidia	Sphingobacteriales	Sphingobacteriaceae	Mucilaginibacter	unclassified_Mucilaginibacter	0	0	0	0	0	0	0	0	224	0	0	21	253	66	0	0	0	0	0	0	0	0	0	0	0	0
ASV_598	Bacteria	Acidobacteriota	Vicinamibacteria	Vicinamibacterales	unclassified_Vicinamibacterales	unclassified_Vicinamibacterales	unclassified_Vicinamibacterales	91	70	0	0	18	0	0	0	0	0	0	59	172	38	0	0	115	0	0	0	0	0	0	0	0	0
ASV_599	Bacteria	Acidobacteriota	Blastocatellia	Blastocatellales	Blastocatellaceae	Blastocatella	unclassified_Blastocatella	0	0	0	0	0	0	0	0	0	0	0	0	0	0	0	0	0	0	0	216	0	0	0	347	0	0
ASV_600	Bacteria	Actinobacteriota	Thermoleophilia	Gaiellales	Gaiellaceae	Gaiella	unclassified_Gaiella	11	0	0	0	0	0	42	74	0	0	0	0	0	0	73	117	15	66	81	16	0	67	0	0	0	0
ASV_601	Bacteria	Proteobacteria	Alphaproteobacteria	Sphingomonadales	Sphingomonadaceae	Sphingomonas	koreensis	0	0	0	0	0	0	0	0	274	42	103	84	0	0	0	0	57	0	0	0	0	0	0	0	0	0
ASV_602	Bacteria	Cyanobacteria	Cyanobacteriia	Phormidesmiales	Phormidesmiaceae	Phormidesmis ANT.LACV5.1	unclassified_Phormidesmis ANT.LACV5.1	0	28	0	0	0	0	64	116	0	0	0	10	0	0	0	0	0	0	77	0	0	263	0	0	0	0
ASV_603	Bacteria	Acidobacteriota	Blastocatellia	2024-11-01	unclassified_11-24	unclassified_11-24	unclassified_11-24	0	30	0	33	0	2	0	0	0	0	0	0	0	0	0	0	492	0	0	0	0	0	0	0	0	0
ASV_604	Bacteria	Proteobacteria	Alphaproteobacteria	Tistrellales	Geminicoccaceae	unclassified_Geminicoccaceae	unclassified_Geminicoccaceae	0	0	0	0	0	0	0	0	0	0	0	0	0	0	0	0	0	5	27	51	163	0	311	0	0	0
ASV_605	Bacteria	Deinococcota	Deinococci	Deinococcales	Trueperaceae	Truepera	unclassified_Truepera	0	0	0	0	0	0	0	0	0	0	0	0	0	0	0	0	0	0	0	0	0	0	0	556	0	0
ASV_606	Bacteria	Proteobacteria	Gammaproteobacteria	Diplorickettsiales	Diplorickettsiaceae	unclassified_Diplorickettsiaceae	unclassified_Diplorickettsiaceae	0	0	0	0	0	0	0	0	336	83	0	107	7	22	0	0	0	0	0	0	0	0	0	0	0	0
ASV_607	Bacteria	Bacteroidota	Kryptonia	Kryptoniales	BSV26	unclassified_BSV26	unclassified_BSV26	0	0	0	0	0	0	0	0	0	0	4	0	502	28	0	0	0	0	0	0	0	0	0	0	3	18
ASV_608	Bacteria	Proteobacteria	Alphaproteobacteria	Sphingomonadales	Sphingomonadaceae	Sphingomonas	unclassified_Sphingomonas	72	135	0	138	0	0	0	0	0	0	0	0	0	0	0	0	93	0	50	14	0	51	0	0	0	0
ASV_609	Bacteria	Bacteroidota	Bacteroidia	Chitinophagales	Chitinophagaceae	Segetibacter	unclassified_Segetibacter	55	0	0	109	232	0	33	0	0	0	0	0	0	0	0	124	0	0	0	0	0	0	0	0	0	0
ASV_610	Bacteria	Verrucomicrobiota	Verrucomicrobiae	Chthoniobacterales	Chthoniobacteraceae	Candidatus Udaeobacter	unclassified_Candidatus Udaeobacter	30	0	92	13	57	18	41	81	0	0	0	0	0	0	79	0	72	43	12	0	0	0	0	0	14	0
ASV_611	Bacteria	Bacteroidota	Bacteroidia	Chitinophagales	Chitinophagaceae	Edaphobaculum	unclassified_Edaphobaculum	16	71	0	43	0	0	0	0	204	19	0	27	0	0	41	0	128	0	0	0	0	0	0	0	0	0
ASV_612	Bacteria	Verrucomicrobiota	Verrucomicrobiae	Chthoniobacterales	Chthoniobacteraceae	Candidatus Udaeobacter	unclassified_Candidatus Udaeobacter	38	0	0	0	0	55	29	0	0	0	0	0	0	0	132	0	238	56	0	0	0	0	0	0	0	0
ASV_613	Bacteria	Verrucomicrobiota	Verrucomicrobiae	Chthoniobacterales	Chthoniobacteraceae	Chthoniobacter	unclassified_Chthoniobacter	0	91	0	101	0	13	0	0	0	0	0	0	0	0	25	0	318	0	0	0	0	0	0	0	0	0
ASV_614	Bacteria	Verrucomicrobiota	Chlamydiae	Chlamydiales	Parachlamydiaceae	unclassified_Parachlamydiaceae	unclassified_Parachlamydiaceae	0	0	0	0	0	0	0	0	0	0	0	11	522	14	0	0	0	0	0	0	0	0	0	0	0	0
ASV_615	Bacteria	Gemmatimonadota	Gemmatimonadetes	Gemmatimonadales	Gemmatimonadaceae	unclassified_Gemmatimonadaceae	unclassified_Gemmatimonadaceae	0	0	0	0	0	0	0	0	0	0	0	0	0	0	0	0	0	0	0	0	0	0	0	0	0	547
ASV_616	Bacteria	Gemmatimonadota	Gemmatimonadetes	Gemmatimonadales	Gemmatimonadaceae	Gemmatimonas	unclassified_Gemmatimonas	26	168	0	26	0	0	0	0	0	0	0	56	0	84	0	0	186	0	0	0	0	0	0	0	0	0
ASV_617	Bacteria	Bacteroidota	Bacteroidia	Sphingobacteriales	KD3-93	unclassified_KD3-93	unclassified_KD3-93	17	140	30	25	68	0	26	24	0	0	0	0	0	0	0	0	200	0	0	0	0	16	0	0	0	0
ASV_618	Bacteria	Actinobacteriota	Actinobacteria	Propionibacteriales	Nocardioidaceae	Marmoricola	unclassified_Marmoricola	53	103	0	138	0	0	0	0	0	0	0	0	0	0	0	0	251	0	0	0	0	0	0	0	0	0
ASV_619	Bacteria	Proteobacteria	Alphaproteobacteria	Rhizobiales	Beijerinckiaceae	Bosea	unclassified_Bosea	29	46	30	21	89	17	5	0	57	18	60	54	0	0	0	0	113	0	0	0	0	0	0	0	0	3
ASV_620	Bacteria	Bacteroidota	Bacteroidia	Chitinophagales	Chitinophagaceae	Segetibacter	unclassified_Segetibacter	196	27	33	61	42	31	118	0	0	0	0	12	0	0	21	0	0	0	0	0	0	0	0	0	0	0
ASV_621	Bacteria	Actinobacteriota	Acidimicrobiia	Microtrichales	Iamiaceae	Iamia	unclassified_Iamia	0	0	0	0	0	0	0	0	0	0	0	0	0	0	80	435	0	26	0	0	0	0	0	0	0	0
ASV_622	Bacteria	Patescibacteria	Parcubacteria	unclassified_Parcubacteria	unclassified_Parcubacteria	unclassified_Parcubacteria	unclassified_Parcubacteria	0	0	0	0	5	0	0	0	0	0	0	0	262	273	0	0	0	0	0	0	0	0	0	0	0	0
ASV_623	Bacteria	Chloroflexi	KD4-96	unclassified_KD4-96	unclassified_KD4-96	unclassified_KD4-96	unclassified_KD4-96	0	0	0	0	0	0	0	0	0	0	0	0	0	0	0	0	0	0	43	47	185	0	39	226	0	0
ASV_624	Bacteria	Acidobacteriota	Blastocatellia	Blastocatellales	Blastocatellaceae	JGI 0001001-H03	unclassified_JGI 0001001-H03	82	0	0	0	0	0	0	0	0	0	0	0	0	0	157	0	16	0	197	0	0	87	0	0	0	0
ASV_625	Bacteria	Bacteroidota	Bacteroidia	Chitinophagales	Chitinophagaceae	Segetibacter	aerophilus	0	0	0	518	0	0	0	0	0	0	0	0	0	0	0	21	0	0	0	0	0	0	0	0	0	0
ASV_626	Bacteria	Acidobacteriota	Holophagae	Subgroup 7	unclassified_Subgroup 7	unclassified_Subgroup 7	unclassified_Subgroup 7	0	0	0	0	0	0	0	0	0	0	0	0	437	0	0	0	0	0	0	0	0	0	0	0	18	84
ASV_627	Bacteria	Proteobacteria	Gammaproteobacteria	Burkholderiales	Oxalobacteraceae	Herbaspirillum	unclassified_Herbaspirillum	0	0	0	0	0	0	0	0	26	0	158	217	0	137	0	0	0	0	0	0	0	0	0	0	0	0
ASV_628	Bacteria	Proteobacteria	Alphaproteobacteria	Rhizobiales	Devosiaceae	unclassified_Devosiaceae	unclassified_Devosiaceae	0	87	28	46	45	0	0	0	0	0	0	0	0	110	0	0	220	0	0	0	0	0	0	0	0	0
ASV_629	Bacteria	Cyanobacteria	Cyanobacteriia	Phormidesmiales	Phormidesmiaceae	Phormidesmis ANT.LACV5.1	unclassified_Phormidesmis ANT.LACV5.1	0	21	0	21	0	0	142	0	0	0	0	0	6	0	0	0	0	28	0	42	0	0	0	276	0	0
ASV_630	Bacteria	Planctomycetota	Phycisphaerae	Tepidisphaerales	WD2101 soil group	unclassified_WD2101 soil group	unclassified_WD2101 soil group	0	0	0	16	0	0	0	0	235	16	17	109	71	20	0	0	52	0	0	0	0	0	0	0	0	0
ASV_631	Bacteria	Gemmatimonadota	Gemmatimonadetes	Gemmatimonadales	Gemmatimonadaceae	unclassified_Gemmatimonadaceae	unclassified_Gemmatimonadaceae	0	0	0	0	0	0	54	131	0	0	0	0	0	0	0	0	0	241	0	0	0	0	0	0	0	110
ASV_632	Bacteria	Planctomycetota	Planctomycetes	Gemmatales	Gemmataceae	Fimbriiglobus	unclassified_Fimbriiglobus	0	0	0	0	0	0	0	0	50	0	356	130	0	0	0	0	0	0	0	0	0	0	0	0	0	0
ASV_633	Bacteria	Chloroflexi	Chloroflexia	Thermomicrobiales	AKYG1722	unclassified_AKYG1722	unclassified_AKYG1722	0	0	0	0	0	0	0	0	0	0	0	0	0	0	0	0	0	0	0	0	26	0	510	0	0	0
ASV_635	Bacteria	Planctomycetota	Planctomycetes	Planctomycetales	unclassified_Planctomycetales	unclassified_Planctomycetales	unclassified_Planctomycetales	0	9	0	30	0	0	0	0	248	20	24	68	0	0	0	0	135	0	0	0	0	0	0	0	0	0
ASV_636	Bacteria	Proteobacteria	Gammaproteobacteria	Burkholderiales	SC-I-84	unclassified_SC-I-84	unclassified_SC-I-84	0	0	0	0	46	0	0	0	0	0	0	0	0	0	0	0	0	46	117	0	0	119	0	0	0	206
ASV_637	Bacteria	Verrucomicrobiota	Verrucomicrobiae	Verrucomicrobiales	Rubritaleaceae	Luteolibacter	algae	210	75	0	104	0	14	0	0	0	0	0	5	8	0	21	15	80	0	0	0	0	0	0	0	0	0
ASV_639	Bacteria	Bacteroidota	Bacteroidia	Cytophagales	Hymenobacteraceae	Hymenobacter	unclassified_Hymenobacter	0	0	0	0	0	0	0	0	0	0	0	0	0	0	439	25	0	0	0	0	0	0	0	67	0	0
ASV_640	Bacteria	Planctomycetota	Planctomycetes	Gemmatales	Gemmataceae	unclassified_Gemmataceae	unclassified_Gemmataceae	0	5	0	0	0	0	0	0	168	61	118	135	17	7	0	0	19	0	0	0	0	0	0	0	0	0
ASV_641	Bacteria	Bacteroidota	Bacteroidia	Sphingobacteriales	Sphingobacteriaceae	Mucilaginibacter	unclassified_Mucilaginibacter	0	0	0	0	0	0	0	0	497	12	6	15	0	0	0	0	0	0	0	0	0	0	0	0	0	0
ASV_642	Bacteria	Verrucomicrobiota	Verrucomicrobiae	Chthoniobacterales	Chthoniobacteraceae	Candidatus Udaeobacter	unclassified_Candidatus Udaeobacter	0	0	0	0	0	0	0	0	0	0	0	0	0	0	0	0	0	0	0	351	109	0	0	70	0	0
ASV_643	Bacteria	Bacteroidota	Bacteroidia	Sphingobacteriales	S15-21	unclassified_S15-21	unclassified_S15-21	0	0	0	0	0	0	0	0	0	0	0	0	0	0	0	0	0	0	0	116	83	0	270	60	0	0
ASV_644	Bacteria	Proteobacteria	Gammaproteobacteria	Burkholderiales	Gallionellaceae	Candidatus Nitrotoga	unclassified_Candidatus Nitrotoga	13	0	0	0	0	0	0	0	0	0	0	31	451	33	0	0	0	0	0	0	0	0	0	0	0	0
ASV_645	Bacteria	Chloroflexi	KD4-96	unclassified_KD4-96	unclassified_KD4-96	unclassified_KD4-96	unclassified_KD4-96	0	0	0	0	76	23	59	89	0	0	0	0	0	0	0	47	0	35	0	182	0	0	0	15	0	0
ASV_646	Bacteria	Proteobacteria	Alphaproteobacteria	Sphingomonadales	Sphingomonadaceae	Sphingomonas	unclassified_Sphingomonas	29	37	16	47	85	0	89	59	0	0	0	0	29	0	22	72	40	0	0	0	0	0	0	0	0	0
ASV_647	Bacteria	Proteobacteria	Alphaproteobacteria	Rhizobiales	unclassified_Rhizobiales	unclassified_Rhizobiales	unclassified_Rhizobiales	16	0	18	0	18	0	0	0	8	0	0	0	9	10	16	0	10	0	13	0	0	0	0	0	51	356
ASV_648	Bacteria	Gemmatimonadota	Gemmatimonadetes	Gemmatimonadales	Gemmatimonadaceae	Gemmatimonas	unclassified_Gemmatimonas	0	0	0	0	0	0	0	0	0	0	0	0	0	0	0	0	0	0	0	67	57	0	401	0	0	0
ASV_649	Bacteria	Proteobacteria	Gammaproteobacteria	Burkholderiales	Burkholderiaceae	Burkholderia-Caballeronia-Paraburkholderia	unclassified_Burkholderia-Caballeronia-Paraburkholderia	0	41	0	106	0	0	0	0	128	22	36	70	0	0	0	0	121	0	0	0	0	0	0	0	0	0
ASV_650	Bacteria	Actinobacteriota	Acidimicrobiia	Microtrichales	Ilumatobacteraceae	unclassified_Ilumatobacteraceae	unclassified_Ilumatobacteraceae	0	0	0	0	16	20	14	17	17	0	0	0	0	0	0	0	0	27	0	206	0	0	0	207	0	0
ASV_651	Bacteria	Actinobacteriota	Actinobacteria	Propionibacteriales	Nocardioidaceae	Nocardioides	unclassified_Nocardioides	73	0	131	0	108	85	82	39	0	0	0	0	0	0	0	0	0	0	0	5	0	0	0	0	0	0
ASV_652	Bacteria	Chloroflexi	Anaerolineae	SBR1031	A4b	unclassified_A4b	unclassified_A4b	94	18	151	0	0	0	0	0	0	0	0	0	0	0	33	58	38	0	0	0	0	129	0	0	0	0
ASV_653	Bacteria	Chloroflexi	Chloroflexia	Thermomicrobiales	JG30-KF-CM45	unclassified_JG30-KF-CM45	unclassified_JG30-KF-CM45	140	33	44	0	29	30	70	42	0	0	0	0	0	0	56	0	39	30	0	0	0	7	0	0	0	0
ASV_654	Bacteria	Proteobacteria	Alphaproteobacteria	Rickettsiales	SM2D12	unclassified_SM2D12	unclassified_SM2D12	0	12	0	45	0	0	0	0	20	14	18	6	0	0	0	0	405	0	0	0	0	0	0	0	0	0
ASV_655	Bacteria	Deinococcota	Deinococci	Deinococcales	Trueperaceae	Truepera	unclassified_Truepera	0	7	41	0	14	16	91	164	0	0	0	0	0	0	0	0	21	122	12	0	0	32	0	0	0	0
ASV_656	Bacteria	Acidobacteriota	Blastocatellia	Pyrinomonadales	Pyrinomonadaceae	RB41	unclassified_RB41	0	0	0	0	0	0	0	275	0	0	0	0	0	0	0	0	0	244	0	0	0	0	0	0	0	0
ASV_657	Bacteria	Bacteroidota	Bacteroidia	Cytophagales	Spirosomaceae	Spirosoma	rigui	106	22	99	251	0	0	0	0	0	0	0	0	23	0	0	0	17	0	0	0	0	0	0	0	0	0
ASV_658	Bacteria	Verrucomicrobiota	Verrucomicrobiae	Chthoniobacterales	Chthoniobacteraceae	Chthoniobacter	unclassified_Chthoniobacter	94	0	13	0	131	0	127	79	0	0	0	0	0	0	0	0	0	0	30	0	0	42	0	0	0	0
ASV_659	Bacteria	Actinobacteriota	Actinobacteria	Micromonosporales	Micromonosporaceae	Longispora	unclassified_Longispora	0	11	33	44	120	28	82	49	6	0	0	0	0	0	0	117	26	0	0	0	0	0	0	0	0	0
ASV_660	Bacteria	Acidobacteriota	Blastocatellia	Blastocatellales	Blastocatellaceae	Blastocatella	unclassified_Blastocatella	0	0	0	0	25	0	24	0	0	0	0	0	0	0	0	0	0	0	0	179	0	0	0	288	0	0
ASV_661	Bacteria	Actinobacteriota	Acidimicrobiia	Microtrichales	Ilumatobacteraceae	unclassified_Ilumatobacteraceae	unclassified_Ilumatobacteraceae	155	91	0	110	91	15	0	0	0	0	0	0	0	0	0	0	53	0	0	0	0	0	0	0	0	0
ASV_662	Bacteria	Fibrobacterota	Fibrobacteria	Fibrobacterales	Fibrobacteraceae	possible genus 04	unclassified_possible genus 04	59	183	0	61	0	0	0	0	0	0	0	0	0	0	0	0	212	0	0	0	0	0	0	0	0	0
ASV_663	Bacteria	Proteobacteria	Alphaproteobacteria	Rhizobiales	Devosiaceae	unclassified_Devosiaceae	unclassified_Devosiaceae	0	0	0	0	0	0	0	0	0	0	0	73	102	172	0	0	168	0	0	0	0	0	0	0	0	0
ASV_664	Bacteria	Gemmatimonadota	Gemmatimonadetes	Gemmatimonadales	Gemmatimonadaceae	unclassified_Gemmatimonadaceae	unclassified_Gemmatimonadaceae	0	0	18	0	95	0	15	106	0	0	0	0	0	0	0	0	0	178	29	0	0	0	0	0	0	73
ASV_665	Bacteria	Actinobacteriota	Actinobacteria	Micrococcales	Intrasporangiaceae	Oryzihumus	unclassified_Oryzihumus	0	0	0	0	0	0	0	0	0	0	0	0	514	0	0	0	0	0	0	0	0	0	0	0	0	0
ASV_666	Bacteria	Planctomycetota	Phycisphaerae	Tepidisphaerales	WD2101 soil group	unclassified_WD2101 soil group	unclassified_WD2101 soil group	0	0	0	0	0	0	0	0	0	0	0	0	0	0	16	0	0	0	0	45	15	0	0	436	0	0
ASV_667	Bacteria	Myxococcota	Polyangia	Polyangiales	Polyangiaceae	Pajaroellobacter	unclassified_Pajaroellobacter	0	0	0	0	0	0	0	0	293	51	51	116	0	0	0	0	0	0	0	0	0	0	0	0	0	0
ASV_668	Bacteria	Bacteroidota	Bacteroidia	Chitinophagales	Chitinophagaceae	Ferruginibacter	unclassified_Ferruginibacter	0	7	0	0	0	0	0	0	0	0	0	0	388	115	0	0	0	0	0	0	0	0	0	0	0	0
ASV_669	Bacteria	Actinobacteriota	Thermoleophilia	Solirubrobacterales	Solirubrobacteraceae	unclassified_Solirubrobacteraceae	unclassified_Solirubrobacteraceae	70	22	31	65	0	0	46	60	0	0	0	0	0	0	0	95	78	0	41	0	0	0	0	0	0	0
ASV_670	Bacteria	Bacteroidota	Bacteroidia	Chitinophagales	Chitinophagaceae	unclassified_Chitinophagaceae	unclassified_Chitinophagaceae	0	68	0	0	0	0	0	0	0	0	0	0	0	0	0	0	440	0	0	0	0	0	0	0	0	0
ASV_671	Bacteria	Verrucomicrobiota	Verrucomicrobiae	Chthoniobacterales	Chthoniobacteraceae	Chthoniobacter	unclassified_Chthoniobacter	0	0	0	0	0	0	0	0	34	0	171	237	0	0	0	0	66	0	0	0	0	0	0	0	0	0
ASV_672	Bacteria	Chloroflexi	Gitt-GS-136	unclassified_Gitt-GS-136	unclassified_Gitt-GS-136	unclassified_Gitt-GS-136	unclassified_Gitt-GS-136	0	0	0	0	0	69	99	103	0	0	0	0	0	0	0	0	0	40	0	0	36	0	0	156	0	0
ASV_673	Bacteria	Proteobacteria	Alphaproteobacteria	Sphingomonadales	Sphingomonadaceae	Sphingomonas	unclassified_Sphingomonas	0	0	0	184	32	0	0	0	0	0	0	49	124	77	0	0	36	0	0	0	0	0	0	0	0	0
ASV_674	Bacteria	Acidobacteriota	Holophagae	Subgroup 7	unclassified_Subgroup 7	unclassified_Subgroup 7	unclassified_Subgroup 7	0	0	0	0	0	0	0	0	0	3	0	0	0	0	0	26	0	0	0	0	0	299	0	0	15	159
ASV_675	Bacteria	Bacteroidota	Bacteroidia	Cytophagales	unclassified_Cytophagales	unclassified_Cytophagales	unclassified_Cytophagales	11	0	30	54	45	42	43	22	0	0	0	0	0	0	170	8	76	0	0	0	0	0	0	0	0	0
ASV_676	Bacteria	Proteobacteria	Gammaproteobacteria	Burkholderiales	A21b	unclassified_A21b	unclassified_A21b	0	3	31	0	0	0	20	22	0	0	0	115	110	41	49	28	15	0	18	0	0	49	0	0	0	0
ASV_677	Bacteria	Proteobacteria	Alphaproteobacteria	Sphingomonadales	Sphingomonadaceae	Sphingomonas	soli	0	156	46	16	0	0	0	0	0	0	0	0	38	0	0	0	244	0	0	0	0	0	0	0	0	0
ASV_678	Bacteria	Actinobacteriota	Actinobacteria	Pseudonocardiales	Pseudonocardiaceae	Crossiella	unclassified_Crossiella	0	0	0	0	0	0	0	0	0	0	0	0	0	0	0	0	0	293	0	73	0	0	0	134	0	0
ASV_679	Bacteria	Planctomycetota	vadinHA49	unclassified_vadinHA49	unclassified_vadinHA49	unclassified_vadinHA49	unclassified_vadinHA49	74	150	7	125	0	0	46	0	0	0	0	0	0	0	61	15	21	0	0	0	0	0	0	0	0	0
ASV_680	Bacteria	Acidobacteriota	Blastocatellia	Blastocatellales	Blastocatellaceae	unclassified_Blastocatellaceae	unclassified_Blastocatellaceae	0	499	0	0	0	0	0	0	0	0	0	0	0	0	0	0	0	0	0	0	0	0	0	0	0	0
ASV_681	Bacteria	Cyanobacteria	Cyanobacteriia	Phormidesmiales	Phormidesmiaceae	Phormidesmis ANT.LACV5.1	unclassified_Phormidesmis ANT.LACV5.1	0	0	79	96	13	0	47	0	0	0	0	0	0	0	134	0	0	0	128	0	0	0	0	0	0	0
ASV_682	Bacteria	Chloroflexi	Chloroflexia	Thermomicrobiales	JG30-KF-CM45	unclassified_JG30-KF-CM45	unclassified_JG30-KF-CM45	111	124	0	99	30	5	0	0	27	0	0	21	17	0	0	15	46	0	0	0	0	0	0	0	0	0
ASV_683	Bacteria	Acidobacteriota	Blastocatellia	Blastocatellales	Blastocatellaceae	Blastocatella	unclassified_Blastocatella	37	0	318	0	37	66	0	0	0	0	0	0	0	0	37	0	0	0	0	0	0	0	0	0	0	0
ASV_684	Bacteria	Verrucomicrobiota	Verrucomicrobiae	Chthoniobacterales	Chthoniobacteraceae	Chthoniobacter	unclassified_Chthoniobacter	30	5	18	0	0	5	30	100	0	0	0	0	0	0	32	0	7	129	91	0	0	48	0	0	0	0
ASV_685	Bacteria	Bacteroidota	Bacteroidia	Cytophagales	MWH-CFBk5	unclassified_MWH-CFBk5	unclassified_MWH-CFBk5	0	0	0	0	3	0	21	0	0	0	0	0	0	0	0	0	0	0	119	100	117	0	135	0	0	0
ASV_686	Bacteria	Bacteroidota	Kapabacteria	Kapabacteriales	unclassified_Kapabacteriales	unclassified_Kapabacteriales	unclassified_Kapabacteriales	0	0	0	0	0	0	0	0	249	75	55	116	0	0	0	0	0	0	0	0	0	0	0	0	0	0
ASV_687	Bacteria	Actinobacteriota	Thermoleophilia	Solirubrobacterales	67-14	unclassified_67-14	unclassified_67-14	0	0	0	0	0	0	0	0	0	0	0	0	15	0	0	0	0	0	46	0	0	433	0	0	0	0
ASV_688	Bacteria	Proteobacteria	Gammaproteobacteria	Xanthomonadales	Xanthomonadaceae	Luteimonas	unclassified_Luteimonas	0	0	0	0	0	0	0	0	0	0	0	0	0	0	0	0	0	0	345	0	0	148	0	0	0	0
ASV_689	Bacteria	Gemmatimonadota	BD2-11 terrestrial group	unclassified_BD2-11 terrestrial group	unclassified_BD2-11 terrestrial group	unclassified_BD2-11 terrestrial group	unclassified_BD2-11 terrestrial group	0	0	0	0	0	0	0	0	0	0	0	0	0	0	0	0	0	0	0	0	86	0	406	0	0	0
ASV_690	Bacteria	Proteobacteria	Alphaproteobacteria	Rhizobiales	Devosiaceae	Devosia	unclassified_Devosia	91	53	0	47	0	0	0	0	81	0	19	83	0	0	0	0	117	0	0	0	0	0	0	0	0	0
ASV_691	Bacteria	Actinobacteriota	Actinobacteria	Pseudonocardiales	Pseudonocardiaceae	Pseudonocardia	alaniniphila	0	0	0	0	0	0	0	0	0	0	0	0	0	0	0	0	0	0	0	0	0	489	0	0	0	0
ASV_692	Bacteria	Acidobacteriota	Acidobacteriae	Paludibaculum	unclassified_Paludibaculum	unclassified_Paludibaculum	unclassified_Paludibaculum	0	37	0	14	0	0	0	0	106	0	11	147	93	80	0	0	0	0	0	0	0	0	0	0	0	0
ASV_693	Bacteria	Proteobacteria	Alphaproteobacteria	Sphingomonadales	Sphingomonadaceae	Sphingomonas	astaxanthinifaciens	0	0	19	71	71	34	56	40	0	0	0	0	0	0	59	82	0	55	0	0	0	0	0	0	0	0
ASV_694	Bacteria	Actinobacteriota	Actinobacteria	Propionibacteriales	Nocardioidaceae	Nocardioides	unclassified_Nocardioides	0	0	0	0	27	36	0	33	0	0	0	0	0	0	0	0	0	0	0	147	0	0	0	244	0	0
ASV_695	Bacteria	Myxococcota	Polyangia	Haliangiales	Haliangiaceae	Haliangium	unclassified_Haliangium	0	0	0	0	22	0	28	131	0	0	0	0	0	0	0	243	0	63	0	0	0	0	0	0	0	0
ASV_696	Bacteria	Proteobacteria	Gammaproteobacteria	Burkholderiales	SC-I-84	unclassified_SC-I-84	unclassified_SC-I-84	0	0	0	0	34	0	29	20	0	0	0	0	0	0	195	89	0	21	22	0	0	76	0	0	0	0
ASV_697	Bacteria	Verrucomicrobiota	Verrucomicrobiae	Chthoniobacterales	Xiphinematobacteraceae	Candidatus Xiphinematobacter	unclassified_Candidatus Xiphinematobacter	0	0	0	0	0	0	0	0	286	10	62	22	10	0	0	0	95	0	0	0	0	0	0	0	0	0
ASV_698	Bacteria	Chloroflexi	Chloroflexia	Thermomicrobiales	JG30-KF-CM45	unclassified_JG30-KF-CM45	unclassified_JG30-KF-CM45	0	0	15	22	30	62	24	41	0	0	0	0	0	0	58	30	0	32	37	69	0	16	0	47	0	0
ASV_699	Bacteria	Chloroflexi	KD4-96	unclassified_KD4-96	unclassified_KD4-96	unclassified_KD4-96	unclassified_KD4-96	23	0	0	0	18	0	22	212	19	0	0	0	0	0	0	0	21	159	0	0	0	0	0	0	0	7
ASV_700	Bacteria	Actinobacteriota	Actinobacteria	Micrococcales	Microbacteriaceae	unclassified_Microbacteriaceae	unclassified_Microbacteriaceae	0	0	0	50	0	0	0	0	235	24	111	59	0	0	0	0	0	0	0	0	0	0	0	0	0	0
ASV_701	Bacteria	Bacteroidota	Bacteroidia	Sphingobacteriales	Sphingobacteriaceae	Pedobacter	unclassified_Pedobacter	99	141	0	74	25	18	0	0	35	8	0	31	0	0	0	0	47	0	0	0	0	0	0	0	0	0
ASV_702	Bacteria	Chloroflexi	Anaerolineae	SBR1031	A4b	unclassified_A4b	unclassified_A4b	4	0	0	12	0	0	9	0	6	0	0	72	33	84	0	74	117	0	0	0	0	67	0	0	0	0
ASV_703	Bacteria	Chloroflexi	Anaerolineae	SBR1031	A4b	OLB13	unclassified_OLB13	0	0	49	0	0	7	42	201	0	0	0	0	0	0	0	0	0	57	76	45	0	0	0	0	0	0
ASV_704	Bacteria	Actinobacteriota	Thermoleophilia	Gaiellales	Gaiellaceae	Gaiella	unclassified_Gaiella	0	0	8	0	28	12	0	18	0	0	0	0	0	0	47	0	0	45	27	0	0	107	0	0	11	174
ASV_705	Bacteria	Actinobacteriota	Thermoleophilia	Solirubrobacterales	Solirubrobacteraceae	unclassified_Solirubrobacteraceae	unclassified_Solirubrobacteraceae	0	0	0	0	274	0	147	0	0	0	0	0	0	0	0	0	0	0	0	56	0	0	0	0	0	0
ASV_706	Bacteria	Verrucomicrobiota	Verrucomicrobiae	Chthoniobacterales	Chthoniobacteraceae	Candidatus Udaeobacter	unclassified_Candidatus Udaeobacter	0	0	0	0	0	0	0	0	0	0	0	0	0	0	0	0	0	0	0	477	0	0	0	0	0	0
ASV_707	Bacteria	Proteobacteria	Gammaproteobacteria	Legionellales	Legionellaceae	Legionella	unclassified_Legionella	48	14	55	0	104	55	34	37	0	0	0	0	0	0	8	0	35	0	0	62	0	9	0	0	0	14
ASV_708	Bacteria	Actinobacteriota	Thermoleophilia	Solirubrobacterales	Solirubrobacteraceae	Solirubrobacter	unclassified_Solirubrobacter	0	0	0	0	0	0	0	0	0	0	0	0	0	0	103	107	0	0	253	0	0	0	0	12	0	0
ASV_709	Bacteria	Bacteroidota	Bacteroidia	Sphingobacteriales	Sphingobacteriaceae	Pedobacter	unclassified_Pedobacter	115	88	46	43	46	0	0	0	38	0	0	0	64	0	0	0	34	0	0	0	0	0	0	0	0	0
ASV_710	Bacteria	Bacteroidota	Bacteroidia	Chitinophagales	Chitinophagaceae	unclassified_Chitinophagaceae	unclassified_Chitinophagaceae	0	0	16	6	22	18	53	62	0	0	0	0	0	0	86	81	9	110	11	0	0	0	0	0	0	0
ASV_711	Bacteria	Proteobacteria	Alphaproteobacteria	Sphingomonadales	Sphingomonadaceae	Sphingomonas	unclassified_Sphingomonas	0	52	0	0	0	0	0	0	0	0	0	85	274	62	0	0	0	0	0	0	0	0	0	0	0	0
ASV_712	Bacteria	Actinobacteriota	Actinobacteria	Micrococcales	Micrococcaceae	Arthrobacter	agilis	0	0	0	0	0	0	0	0	0	0	0	0	0	0	454	0	0	0	0	17	0	0	0	0	0	0
ASV_713	Bacteria	Verrucomicrobiota	Verrucomicrobiae	Chthoniobacterales	unclassified_Chthoniobacterales	unclassified_Chthoniobacterales	unclassified_Chthoniobacterales	0	0	0	0	0	0	0	0	0	0	0	0	0	0	0	0	0	0	0	86	44	0	205	135	0	0
ASV_714	Bacteria	Proteobacteria	Gammaproteobacteria	Xanthomonadales	Xanthomonadaceae	Luteimonas	unclassified_Luteimonas	0	0	0	0	0	0	0	0	0	0	0	0	0	0	0	0	0	0	0	0	0	0	470	0	0	0
ASV_715	Bacteria	Verrucomicrobiota	Chlamydiae	Chlamydiales	Parachlamydiaceae	unclassified_Parachlamydiaceae	unclassified_Parachlamydiaceae	12	0	0	0	0	9	0	0	0	0	0	0	433	0	15	0	0	0	0	0	0	0	0	0	0	0
ASV_716	Bacteria	Verrucomicrobiota	Chlamydiae	Chlamydiales	Parachlamydiaceae	Neochlamydia	unclassified_Neochlamydia	10	0	0	0	0	0	0	0	0	0	0	35	354	56	0	14	0	0	0	0	0	0	0	0	0	0
ASV_717	Bacteria	Cyanobacteria	Cyanobacteriia	Cyanobacteriales	Chroococcidiopsaceae	Crinalium SAG 22.89	unclassified_Crinalium SAG 22.89	0	0	6	23	0	0	212	0	0	0	0	0	0	0	0	0	0	24	204	0	0	0	0	0	0	0
ASV_718	Bacteria	Gemmatimonadota	Gemmatimonadetes	Gemmatimonadales	Gemmatimonadaceae	unclassified_Gemmatimonadaceae	unclassified_Gemmatimonadaceae	59	0	0	0	24	0	71	36	0	0	0	0	0	0	85	193	0	0	0	0	0	0	0	0	0	0
ASV_719	Bacteria	Actinobacteriota	Actinobacteria	Streptomycetales	Streptomycetaceae	Streptomyces	lavendulae	36	0	15	33	29	0	81	47	40	0	0	0	0	0	26	0	29	18	20	0	0	0	0	0	18	76
ASV_720	Bacteria	Bacteroidota	Bacteroidia	Sphingobacteriales	AKYH767	unclassified_AKYH767	unclassified_AKYH767	0	36	0	0	0	0	0	0	51	9	245	79	0	0	0	0	48	0	0	0	0	0	0	0	0	0
ASV_721	Bacteria	Proteobacteria	Gammaproteobacteria	Nitrosococcales	Nitrosococcaceae	wb1-P19	unclassified_wb1-P19	0	0	0	0	467	0	0	0	0	0	0	0	0	0	0	0	0	0	0	0	0	0	0	0	0	0
ASV_722	Bacteria	Acidobacteriota	Blastocatellia	2024-11-01	unclassified_11-24	unclassified_11-24	unclassified_11-24	35	66	0	0	0	0	0	0	0	0	0	0	0	16	8	18	311	0	0	0	0	0	0	0	0	12
ASV_723	Bacteria	Proteobacteria	Gammaproteobacteria	Burkholderiales	Oxalobacteraceae	Actimicrobium	unclassified_Actimicrobium	0	0	0	46	0	0	37	0	0	0	247	0	0	120	0	0	0	0	0	0	0	0	0	16	0	0
ASV_724	Bacteria	Bacteroidota	Bacteroidia	Chitinophagales	Chitinophagaceae	Ferruginibacter	unclassified_Ferruginibacter	0	0	0	0	0	0	0	0	201	0	200	65	0	0	0	0	0	0	0	0	0	0	0	0	0	0
ASV_725	Bacteria	Bacteroidota	Bacteroidia	Cytophagales	Cyclobacteriaceae	unclassified_Cyclobacteriaceae	unclassified_Cyclobacteriaceae	0	0	0	0	0	0	0	0	0	0	0	0	0	0	0	0	0	0	0	0	0	0	463	0	0	0
ASV_726	Bacteria	Actinobacteriota	Thermoleophilia	Solirubrobacterales	Solirubrobacteraceae	Conexibacter	unclassified_Conexibacter	24	30	33	103	66	0	55	0	0	0	0	0	4	0	71	76	0	0	0	0	0	0	0	0	0	0
ASV_727	Bacteria	Verrucomicrobiota	Verrucomicrobiae	Pedosphaerales	Pedosphaeraceae	unclassified_Pedosphaeraceae	unclassified_Pedosphaeraceae	0	51	0	284	0	0	0	0	22	3	0	0	47	0	0	19	36	0	0	0	0	0	0	0	0	0
ASV_728	Bacteria	Chloroflexi	Chloroflexia	Thermobaculales	Thermobaculaceae	Thermobaculum	unclassified_Thermobaculum	0	5	5	2	51	53	62	73	0	0	0	0	0	0	53	41	4	100	0	0	0	13	0	0	0	0
ASV_729	Bacteria	Proteobacteria	Alphaproteobacteria	Rhizobiales	Rhizobiales Incertae Sedis	unclassified_Rhizobiales Incertae Sedis	unclassified_Rhizobiales Incertae Sedis	0	0	0	0	27	0	18	52	6	0	0	0	40	0	20	0	0	141	24	0	0	62	0	0	0	71
ASV_730	Bacteria	Verrucomicrobiota	Verrucomicrobiae	Verrucomicrobiales	Verrucomicrobiaceae	Prosthecobacter	unclassified_Prosthecobacter	0	25	0	42	0	0	0	0	0	0	301	60	13	0	0	0	19	0	0	0	0	0	0	0	0	0
ASV_731	Bacteria	Proteobacteria	Alphaproteobacteria	Caulobacterales	Caulobacteraceae	Brevundimonas	alba	33	81	53	10	11	0	0	15	0	0	43	16	67	0	0	0	51	15	50	0	0	13	0	0	0	0
ASV_732	Bacteria	Actinobacteriota	Thermoleophilia	Gaiellales	unclassified_Gaiellales	unclassified_Gaiellales	unclassified_Gaiellales	0	0	0	0	0	0	0	0	24	0	0	0	28	0	0	0	0	0	0	0	0	169	0	0	42	195
ASV_733	Bacteria	Bacteroidota	Bacteroidia	Chitinophagales	Chitinophagaceae	unclassified_Chitinophagaceae	unclassified_Chitinophagaceae	30	45	0	72	41	0	0	0	9	0	0	0	0	0	53	36	127	0	0	0	0	44	0	0	0	0
ASV_734	Bacteria	Bacteroidota	Bacteroidia	Chitinophagales	Chitinophagaceae	Flaviaesturariibacter	unclassified_Flaviaesturariibacter	15	0	13	0	105	0	0	0	0	0	0	0	0	0	61	0	263	0	0	0	0	0	0	0	0	0
ASV_735	Archaea	Crenarchaeota	Nitrososphaeria	Nitrososphaerales	Nitrososphaeraceae	unclassified_Nitrososphaeraceae	unclassified_Nitrososphaeraceae	0	0	0	0	0	0	0	0	0	0	0	0	0	0	0	0	0	0	84	0	0	372	0	0	0	0
ASV_736	Bacteria	Verrucomicrobiota	Verrucomicrobiae	Verrucomicrobiales	Rubritaleaceae	Luteolibacter	unclassified_Luteolibacter	31	22	0	0	0	0	28	0	0	0	0	0	0	0	26	0	0	29	151	37	94	37	0	0	0	0
ASV_737	Bacteria	Acidobacteriota	Blastocatellia	Blastocatellales	Blastocatellaceae	Blastocatella	unclassified_Blastocatella	0	0	0	0	0	0	0	14	0	0	0	0	0	0	58	0	0	0	65	212	0	0	0	106	0	0
ASV_738	Bacteria	Planctomycetota	Planctomycetes	Pirellulales	Pirellulaceae	Roseimaritima	unclassified_Roseimaritima	0	0	0	0	0	0	0	0	0	0	0	0	0	0	0	0	0	0	0	43	103	0	196	112	0	0
ASV_739	Bacteria	Bacteroidota	Bacteroidia	Sphingobacteriales	AKYH767	unclassified_AKYH767	unclassified_AKYH767	118	0	0	0	90	0	77	66	0	0	0	0	0	0	53	0	0	0	0	0	0	0	0	0	0	48
ASV_740	Bacteria	Gemmatimonadota	AKAU4049	unclassified_AKAU4049	unclassified_AKAU4049	unclassified_AKAU4049	unclassified_AKAU4049	0	0	0	0	0	0	0	0	43	0	0	0	0	0	0	0	0	0	96	131	0	63	0	8	0	111
ASV_741	Bacteria	Deinococcota	Deinococci	Deinococcales	Trueperaceae	Truepera	unclassified_Truepera	29	18	0	0	63	0	92	0	0	0	0	0	0	0	0	0	19	0	59	0	0	0	0	171	0	0
ASV_742	Bacteria	Actinobacteriota	Thermoleophilia	Solirubrobacterales	67-14	unclassified_67-14	unclassified_67-14	0	0	0	0	0	0	0	0	24	0	0	79	268	47	0	0	33	0	0	0	0	0	0	0	0	0
ASV_743	Bacteria	Verrucomicrobiota	Verrucomicrobiae	Verrucomicrobiales	Verrucomicrobiaceae	unclassified_Verrucomicrobiaceae	unclassified_Verrucomicrobiaceae	23	54	45	221	51	0	0	0	0	0	0	24	0	0	0	0	32	0	0	0	0	0	0	0	0	0
ASV_744	Bacteria	Proteobacteria	Alphaproteobacteria	Micropepsales	Micropepsaceae	unclassified_Micropepsaceae	unclassified_Micropepsaceae	0	0	0	62	0	0	0	0	232	39	41	0	0	0	0	0	75	0	0	0	0	0	0	0	0	0
ASV_745	Bacteria	Chloroflexi	Anaerolineae	SBR1031	A4b	unclassified_A4b	unclassified_A4b	0	30	0	16	0	0	0	0	100	0	0	0	0	0	142	95	64	0	0	0	0	0	0	0	0	0
ASV_746	Bacteria	Verrucomicrobiota	Verrucomicrobiae	Chthoniobacterales	Chthoniobacteraceae	Candidatus Udaeobacter	unclassified_Candidatus Udaeobacter	0	0	0	0	0	0	51	0	0	0	0	0	0	0	52	0	0	58	0	222	0	0	0	64	0	0
ASV_747	Bacteria	Acidobacteriota	Blastocatellia	Pyrinomonadales	Pyrinomonadaceae	RB41	unclassified_RB41	0	0	0	0	0	0	0	40	0	0	0	0	0	0	0	182	0	225	0	0	0	0	0	0	0	0
ASV_748	Bacteria	Acidobacteriota	Blastocatellia	Blastocatellales	Blastocatellaceae	Blastocatella	unclassified_Blastocatella	0	0	0	0	0	0	0	0	0	0	0	0	0	0	0	0	0	0	0	0	0	0	0	447	0	0
ASV_749	Bacteria	Actinobacteriota	Thermoleophilia	Solirubrobacterales	67-14	unclassified_67-14	unclassified_67-14	0	0	26	0	35	0	0	18	0	0	0	0	0	0	33	0	13	25	41	119	0	0	0	0	71	64
ASV_750	Bacteria	Bacteroidota	Bacteroidia	Chitinophagales	unclassified_Chitinophagales	unclassified_Chitinophagales	unclassified_Chitinophagales	0	0	28	0	13	9	31	118	0	0	0	0	0	0	0	0	0	13	160	0	0	66	0	0	3	3
ASV_751	Bacteria	Verrucomicrobiota	Verrucomicrobiae	Opitutales	Opitutaceae	Opitutus	unclassified_Opitutus	0	0	30	0	32	0	64	42	0	0	0	0	0	0	0	0	0	35	20	89	0	42	0	89	0	0
ASV_752	Bacteria	Bacteroidota	Bacteroidia	Chitinophagales	Chitinophagaceae	Flavisolibacter	rigui	0	0	0	0	272	0	29	131	0	0	0	0	0	0	0	0	0	0	0	0	0	0	0	0	0	11
ASV_753	Bacteria	Bacteroidota	Ignavibacteria	SJA-28	unclassified_SJA-28	unclassified_SJA-28	unclassified_SJA-28	0	0	0	0	0	0	0	0	0	0	0	0	0	0	112	0	0	179	112	40	0	0	0	0	0	0
ASV_754	Bacteria	Actinobacteriota	Actinobacteria	Frankiales	unclassified_Frankiales	unclassified_Frankiales	unclassified_Frankiales	19	0	36	16	73	25	70	21	0	0	0	0	0	0	70	0	20	0	0	36	0	0	0	56	0	0
ASV_755	Bacteria	Proteobacteria	Gammaproteobacteria	Burkholderiales	Nitrosomonadaceae	mle1-7	unclassified_mle1-7	0	0	5	0	7	0	6	0	0	0	0	0	0	14	10	0	0	7	0	0	0	9	0	0	6	378
ASV_756	Bacteria	Actinobacteriota	Actinobacteria	Micrococcales	Microbacteriaceae	Curtobacterium	unclassified_Curtobacterium	0	0	0	0	0	0	0	0	319	35	0	85	0	0	0	0	0	0	0	0	0	0	0	0	0	0
ASV_757	Bacteria	Bacteroidota	Bacteroidia	Cytophagales	Cytophagaceae	Cytophaga	aurantiaca	0	0	20	0	0	0	0	0	0	0	316	66	0	0	0	0	35	0	0	0	0	0	0	0	0	0
ASV_758	Bacteria	Proteobacteria	Gammaproteobacteria	Burkholderiales	Oxalobacteraceae	Noviherbaspirillum	unclassified_Noviherbaspirillum	85	0	56	68	126	0	101	0	0	0	0	0	0	0	0	0	0	0	0	0	0	0	0	0	0	0
ASV_759	Bacteria	Cyanobacteria	Cyanobacteriia	Leptolyngbyales	Leptolyngbyaceae	Phormidium SAG 37.90	unclassified_Phormidium SAG 37.90	0	0	226	0	0	0	210	0	0	0	0	0	0	0	0	0	0	0	0	0	0	0	0	0	0	0
ASV_760	Bacteria	Armatimonadota	Fimbriimonadia	Fimbriimonadales	Fimbriimonadaceae	unclassified_Fimbriimonadaceae	unclassified_Fimbriimonadaceae	0	0	0	0	0	0	0	0	204	5	157	70	0	0	0	0	0	0	0	0	0	0	0	0	0	0
ASV_761	Bacteria	Proteobacteria	Alphaproteobacteria	Acetobacterales	Acetobacteraceae	unclassified_Acetobacteraceae	unclassified_Acetobacteraceae	34	40	0	56	27	0	0	0	0	0	0	0	0	0	0	0	278	0	0	0	0	0	0	0	0	0
ASV_762	Bacteria	Myxococcota	Polyangia	Polyangiales	Polyangiaceae	Pajaroellobacter	unclassified_Pajaroellobacter	0	0	0	57	0	9	19	0	89	0	47	42	96	28	21	0	0	0	26	0	0	0	0	0	0	0
ASV_763	Bacteria	Gemmatimonadota	Gemmatimonadetes	Gemmatimonadales	Gemmatimonadaceae	Gemmatimonas	unclassified_Gemmatimonas	0	0	0	0	0	0	0	0	0	0	0	0	0	0	0	0	0	0	0	0	0	0	0	0	26	408
ASV_764	Bacteria	Proteobacteria	Alphaproteobacteria	Acetobacterales	Acetobacteraceae	Acidiphilium	unclassified_Acidiphilium	39	15	42	45	65	63	30	24	0	0	0	0	0	0	47	37	25	0	0	0	0	0	0	0	0	0
ASV_765	Bacteria	Chloroflexi	Chloroflexia	Thermomicrobiales	JG30-KF-CM45	unclassified_JG30-KF-CM45	unclassified_JG30-KF-CM45	0	0	0	0	18	38	42	0	0	0	0	0	0	0	121	0	0	78	0	0	0	0	0	135	0	0
ASV_766	Bacteria	Bacteroidota	Bacteroidia	Chitinophagales	Saprospiraceae	unclassified_Saprospiraceae	unclassified_Saprospiraceae	0	0	0	0	0	0	0	0	0	0	0	0	262	168	0	0	0	0	0	0	0	0	0	0	0	0
ASV_767	Bacteria	Proteobacteria	Gammaproteobacteria	Burkholderiales	TRA3-20	unclassified_TRA3-20	unclassified_TRA3-20	0	0	0	0	0	0	0	0	0	0	0	0	137	0	0	0	0	11	0	0	0	17	0	0	14	251
ASV_768	Bacteria	Cyanobacteria	Cyanobacteriia	Phormidesmiales	Phormidesmiaceae	Phormidesmis ANT.LACV5.1	unclassified_Phormidesmis ANT.LACV5.1	0	0	0	0	0	0	0	0	0	0	0	0	0	0	0	0	0	0	0	0	429	0	0	0	0	0
ASV_769	Bacteria	Acidobacteriota	Blastocatellia	Blastocatellales	Blastocatellaceae	Blastocatella	unclassified_Blastocatella	70	0	16	0	0	0	46	41	0	0	0	0	0	0	0	0	0	187	26	0	0	14	0	28	0	0
ASV_770	Bacteria	Bacteroidota	Bacteroidia	Chitinophagales	Chitinophagaceae	unclassified_Chitinophagaceae	unclassified_Chitinophagaceae	0	0	0	0	51	89	20	0	0	0	0	0	0	0	222	46	0	0	0	0	0	0	0	0	0	0
ASV_771	Bacteria	Actinobacteriota	Actinobacteria	Micrococcales	Intrasporangiaceae	unclassified_Intrasporangiaceae	unclassified_Intrasporangiaceae	0	0	0	0	0	0	0	0	0	0	0	0	0	0	0	0	0	0	0	0	147	0	281	0	0	0
ASV_772	Bacteria	Proteobacteria	Alphaproteobacteria	Rhizobiales	Xanthobacteraceae	Pseudolabrys	unclassified_Pseudolabrys	26	41	0	15	43	13	0	0	0	0	0	0	75	38	12	0	154	0	0	0	0	0	0	0	0	9
ASV_773	Bacteria	Proteobacteria	Alphaproteobacteria	Caulobacterales	Caulobacteraceae	unclassified_Caulobacteraceae	unclassified_Caulobacteraceae	0	26	0	0	0	0	0	0	48	0	194	158	0	0	0	0	0	0	0	0	0	0	0	0	0	0
ASV_774	Bacteria	Actinobacteriota	Actinobacteria	Micrococcales	Microbacteriaceae	Marisediminicola	unclassified_Marisediminicola	237	127	61	0	0	0	0	0	0	0	0	0	0	0	0	0	0	0	0	0	0	0	0	0	0	0
ASV_775	Bacteria	Proteobacteria	Gammaproteobacteria	Pseudomonadales	Porticoccaceae	C1-B045	unclassified_C1-B045	0	0	0	0	0	0	0	0	9	4	13	149	105	145	0	0	0	0	0	0	0	0	0	0	0	0
ASV_776	Archaea	Crenarchaeota	Nitrososphaeria	Nitrososphaerales	Nitrososphaeraceae	unclassified_Nitrososphaeraceae	unclassified_Nitrososphaeraceae	0	0	0	0	0	0	0	0	0	0	0	0	0	0	0	78	0	151	0	0	0	196	0	0	0	0
ASV_777	Archaea	Crenarchaeota	Nitrososphaeria	Nitrososphaerales	Nitrososphaeraceae	unclassified_Nitrososphaeraceae	unclassified_Nitrososphaeraceae	0	0	0	0	0	0	0	0	0	0	0	0	0	0	0	0	0	0	0	0	0	425	0	0	0	0
ASV_778	Bacteria	Bacteroidota	Bacteroidia	Cytophagales	Cyclobacteriaceae	Marivirga	lumbricoides	7	0	0	0	0	0	0	0	0	0	0	0	0	0	0	0	0	0	0	0	417	0	0	0	0	0
ASV_779	Bacteria	Bacteroidota	Bacteroidia	Flavobacteriales	Flavobacteriaceae	Flavobacterium	caeni	266	57	0	83	10	7	0	0	0	0	0	0	0	0	0	0	0	0	0	0	0	0	0	0	0	0
ASV_780	Bacteria	Armatimonadota	Fimbriimonadia	Fimbriimonadales	Fimbriimonadaceae	unclassified_Fimbriimonadaceae	unclassified_Fimbriimonadaceae	0	0	0	0	0	0	0	0	93	0	208	122	0	0	0	0	0	0	0	0	0	0	0	0	0	0
ASV_781	Bacteria	Bacteroidota	Bacteroidia	Cytophagales	Hymenobacteraceae	Hymenobacter	unclassified_Hymenobacter	26	78	29	133	59	19	0	0	0	0	0	10	0	0	56	0	0	0	0	0	0	0	0	0	12	0
ASV_782	Bacteria	Acidobacteriota	Holophagae	Subgroup 7	unclassified_Subgroup 7	unclassified_Subgroup 7	unclassified_Subgroup 7	22	0	0	8	0	0	0	0	0	0	0	0	0	0	95	0	0	98	128	0	0	36	0	0	0	35
ASV_783	Bacteria	Acidobacteriota	Acidobacteriae	Bryobacterales	Bryobacteraceae	Bryobacter	unclassified_Bryobacter	0	0	0	0	0	69	24	161	0	0	0	0	0	0	0	0	0	166	0	0	0	0	0	0	0	0
ASV_784	Bacteria	Acidobacteriota	Blastocatellia	Blastocatellales	Blastocatellaceae	Blastocatella	unclassified_Blastocatella	0	0	0	0	0	0	0	0	0	0	0	0	0	0	0	0	0	0	0	0	65	0	0	355	0	0
ASV_785	Bacteria	Cyanobacteria	Cyanobacteriia	Cyanobacteriales	Phormidiaceae	Trichocoleus SAG 26.92	unclassified_Trichocoleus SAG 26.92	0	0	384	0	0	0	29	0	0	0	0	0	0	0	0	0	0	0	0	0	0	0	0	0	5	0
ASV_786	Bacteria	Proteobacteria	Alphaproteobacteria	Rhodobacterales	Rhodobacteraceae	Oceanicella	unclassified_Oceanicella	0	0	124	0	53	27	91	69	0	0	0	0	0	0	28	0	0	26	0	0	0	0	0	0	0	0
ASV_787	Bacteria	Verrucomicrobiota	Verrucomicrobiae	Chthoniobacterales	Chthoniobacteraceae	Chthoniobacter	unclassified_Chthoniobacter	0	0	0	245	0	0	0	0	0	0	0	0	0	0	0	153	0	0	19	0	0	0	0	0	0	0
ASV_788	Bacteria	Bacteroidota	Bacteroidia	Chitinophagales	Chitinophagaceae	Sediminibacterium	unclassified_Sediminibacterium	0	0	0	0	0	0	0	0	0	0	0	22	358	37	0	0	0	0	0	0	0	0	0	0	0	0
ASV_789	Bacteria	Actinobacteriota	Actinobacteria	Frankiales	unclassified_Frankiales	unclassified_Frankiales	unclassified_Frankiales	56	29	0	131	21	20	19	0	0	0	0	0	58	82	0	0	0	0	0	0	0	0	0	0	0	0
ASV_790	Bacteria	Bacteroidota	Bacteroidia	Sphingobacteriales	Sphingobacteriaceae	Pedobacter	unclassified_Pedobacter	174	82	0	42	27	0	0	0	0	0	0	0	48	0	0	0	41	0	0	0	0	0	0	0	0	0
ASV_791	Bacteria	Proteobacteria	Alphaproteobacteria	Acetobacterales	Acetobacteraceae	Roseomonas	aquatica	74	41	37	128	19	9	43	0	0	0	0	17	0	0	13	18	15	0	0	0	0	0	0	0	0	0
ASV_792	Bacteria	Cyanobacteria	Cyanobacteriia	Cyanobacteriales	unclassified_Cyanobacteriales	unclassified_Cyanobacteriales	unclassified_Cyanobacteriales	0	0	0	37	0	0	0	0	0	0	0	0	0	0	0	377	0	0	0	0	0	0	0	0	0	0
ASV_793	Bacteria	Bacteroidota	Bacteroidia	Chitinophagales	unclassified_Chitinophagales	unclassified_Chitinophagales	unclassified_Chitinophagales	0	0	17	0	0	18	0	0	254	34	0	0	0	0	0	0	89	0	0	0	0	0	0	0	0	0
ASV_794	Bacteria	Proteobacteria	Gammaproteobacteria	Xanthomonadales	Xanthomonadaceae	Arenimonas	unclassified_Arenimonas	0	0	0	13	0	0	4	0	0	0	0	0	301	71	0	0	23	0	0	0	0	0	0	0	0	0
ASV_795	Bacteria	Nitrospirota	Nitrospiria	Nitrospirales	Nitrospiraceae	Nitrospira	unclassified_Nitrospira	13	0	11	5	34	0	0	21	0	0	0	0	0	0	55	26	0	108	58	0	0	0	0	0	11	68
ASV_796	Bacteria	Acidobacteriota	Blastocatellia	Blastocatellales	Blastocatellaceae	Blastocatella	unclassified_Blastocatella	0	0	0	410	0	0	0	0	0	0	0	0	0	0	0	0	0	0	0	0	0	0	0	0	0	0
ASV_797	Bacteria	Verrucomicrobiota	Verrucomicrobiae	Chthoniobacterales	Chthoniobacteraceae	Candidatus Udaeobacter	unclassified_Candidatus Udaeobacter	0	0	0	0	0	0	0	0	0	0	0	0	0	0	0	0	0	0	0	0	0	410	0	0	0	0
ASV_798	Bacteria	Actinobacteriota	Actinobacteria	Propionibacteriales	Nocardioidaceae	Marmoricola	unclassified_Marmoricola	83	69	0	83	0	0	0	0	0	0	0	0	0	0	0	0	174	0	0	0	0	0	0	0	0	0
ASV_799	Bacteria	Proteobacteria	Alphaproteobacteria	Sphingomonadales	Sphingomonadaceae	Sphingomonas	echinoides	0	0	0	0	0	0	0	0	115	0	294	0	0	0	0	0	0	0	0	0	0	0	0	0	0	0
ASV_800	Bacteria	Planctomycetota	Planctomycetes	Pirellulales	Pirellulaceae	unclassified_Pirellulaceae	unclassified_Pirellulaceae	0	0	0	0	0	0	0	0	0	0	0	0	359	34	0	0	0	0	0	0	0	0	0	0	0	16
ASV_801	Bacteria	Proteobacteria	Gammaproteobacteria	Gammaproteobacteria Incertae Sedis	Unknown Family	Wenzhouxiangella	unclassified_Wenzhouxiangella	0	0	0	0	0	0	0	0	0	0	0	0	0	0	0	0	0	0	0	0	408	0	0	0	0	0
ASV_802	Bacteria	Actinobacteriota	Actinobacteria	Micrococcales	Intrasporangiaceae	Terrabacter	unclassified_Terrabacter	102	87	17	74	23	9	0	0	0	0	20	0	33	4	0	0	38	0	0	0	0	0	0	0	0	0
ASV_803	Bacteria	Chloroflexi	Chloroflexia	Thermomicrobiales	JG30-KF-CM45	unclassified_JG30-KF-CM45	unclassified_JG30-KF-CM45	58	68	0	0	0	0	0	0	21	0	19	34	168	5	0	0	34	0	0	0	0	0	0	0	0	0
ASV_804	Bacteria	Verrucomicrobiota	Verrucomicrobiae	Pedosphaerales	Pedosphaeraceae	unclassified_Pedosphaeraceae	unclassified_Pedosphaeraceae	30	0	0	0	32	0	70	41	0	0	0	0	0	0	0	0	0	33	0	0	0	0	0	0	17	184
ASV_805	Bacteria	Acidobacteriota	Holophagae	Subgroup 7	unclassified_Subgroup 7	unclassified_Subgroup 7	unclassified_Subgroup 7	0	0	0	0	0	0	0	75	0	0	0	0	0	0	0	0	7	273	51	0	0	0	0	0	0	0
ASV_806	Bacteria	Actinobacteriota	Acidimicrobiia	unclassified_Acidimicrobiia	unclassified_Acidimicrobiia	unclassified_Acidimicrobiia	unclassified_Acidimicrobiia	0	0	0	0	0	0	0	0	0	0	0	0	0	0	0	0	0	0	0	143	0	0	0	262	0	0
ASV_807	Bacteria	Acidobacteriota	Acidobacteriae	Acidobacteriales	Acidobacteriaceae (Subgroup 1)	Granulicella	unclassified_Granulicella	0	6	0	9	0	0	0	0	253	19	35	68	0	0	0	0	14	0	0	0	0	0	0	0	0	0
ASV_808	Bacteria	Proteobacteria	Gammaproteobacteria	Burkholderiales	Oxalobacteraceae	Herbaspirillum	unclassified_Herbaspirillum	0	0	0	0	0	0	0	0	0	0	0	0	0	120	0	0	228	13	0	15	0	0	0	0	0	28
ASV_809	Bacteria	Gemmatimonadota	Gemmatimonadetes	Gemmatimonadales	Gemmatimonadaceae	unclassified_Gemmatimonadaceae	unclassified_Gemmatimonadaceae	0	0	0	0	0	0	0	0	0	0	0	0	376	27	0	0	0	0	0	0	0	0	0	0	0	0
ASV_810	Bacteria	Acidobacteriota	Blastocatellia	Blastocatellales	Blastocatellaceae	Blastocatella	unclassified_Blastocatella	0	0	0	0	104	65	0	0	0	0	0	0	0	0	52	181	0	0	0	0	0	0	0	0	0	0
ASV_811	Bacteria	Gemmatimonadota	Gemmatimonadetes	Gemmatimonadales	Gemmatimonadaceae	unclassified_Gemmatimonadaceae	unclassified_Gemmatimonadaceae	0	0	0	0	90	0	96	0	0	0	0	0	0	11	0	85	0	0	0	120	0	0	0	0	0	0
ASV_812	Bacteria	Actinobacteriota	Actinobacteria	Frankiales	Frankiaceae	Jatrophihabitans	unclassified_Jatrophihabitans	0	0	0	0	0	0	0	0	121	38	122	121	0	0	0	0	0	0	0	0	0	0	0	0	0	0
ASV_813	Bacteria	Acidobacteriota	Vicinamibacteria	Vicinamibacterales	Vicinamibacteraceae	Luteitalea	unclassified_Luteitalea	0	0	26	0	0	0	47	59	0	0	0	0	0	0	0	0	0	0	124	93	52	0	0	0	0	0
ASV_814	Bacteria	Dependentiae	Babeliae	Babeliales	Vermiphilaceae	unclassified_Vermiphilaceae	unclassified_Vermiphilaceae	0	0	0	6	0	0	0	0	260	0	24	35	8	0	0	0	68	0	0	0	0	0	0	0	0	0
ASV_815	Bacteria	Chloroflexi	KD4-96	unclassified_KD4-96	unclassified_KD4-96	unclassified_KD4-96	unclassified_KD4-96	0	0	0	0	35	0	52	84	0	0	0	0	0	0	100	80	0	36	14	0	0	0	0	0	0	0
ASV_816	Bacteria	Verrucomicrobiota	Verrucomicrobiae	Chthoniobacterales	Chthoniobacteraceae	unclassified_Chthoniobacteraceae	unclassified_Chthoniobacteraceae	0	0	0	0	0	0	0	0	0	0	0	0	0	0	0	0	0	0	0	0	371	0	30	0	0	0
ASV_817	Bacteria	Proteobacteria	Alphaproteobacteria	Tistrellales	Geminicoccaceae	unclassified_Geminicoccaceae	unclassified_Geminicoccaceae	0	0	0	0	0	0	0	0	0	0	0	0	0	0	0	0	0	0	0	0	271	0	129	0	0	0
ASV_818	Bacteria	Proteobacteria	Alphaproteobacteria	Rhizobiales	Rhizobiaceae	Aminobacter	aminovorans	77	109	0	0	27	0	0	0	0	0	0	0	47	19	35	0	85	0	0	0	0	0	0	0	0	0
ASV_819	Bacteria	Proteobacteria	Gammaproteobacteria	Xanthomonadales	Xanthomonadaceae	Lysobacter	concretionis	0	0	0	0	0	0	0	0	0	0	0	0	0	0	0	0	0	0	45	311	0	10	0	33	0	0
ASV_820	Bacteria	Chloroflexi	KD4-96	unclassified_KD4-96	unclassified_KD4-96	unclassified_KD4-96	unclassified_KD4-96	0	30	0	0	0	0	0	0	15	0	35	0	262	0	0	55	0	0	0	0	0	0	0	0	0	0
ASV_821	Bacteria	Actinobacteriota	Acidimicrobiia	unclassified_Acidimicrobiia	unclassified_Acidimicrobiia	unclassified_Acidimicrobiia	unclassified_Acidimicrobiia	0	0	0	0	0	17	26	12	0	0	0	0	0	0	25	0	0	0	19	9	71	0	82	136	0	0
ASV_822	Bacteria	Actinobacteriota	Rubrobacteria	Rubrobacterales	Rubrobacteriaceae	Rubrobacter	unclassified_Rubrobacter	0	0	0	0	0	0	0	0	0	0	0	0	0	0	0	0	0	0	0	126	0	0	0	271	0	0
ASV_823	Bacteria	Chloroflexi	Chloroflexia	Thermomicrobiales	JG30-KF-CM45	unclassified_JG30-KF-CM45	unclassified_JG30-KF-CM45	20	0	0	0	0	41	0	0	0	0	0	8	0	0	47	113	0	126	0	0	0	0	0	0	0	41
ASV_824	Bacteria	Actinobacteriota	Actinobacteria	Propionibacteriales	Nocardioidaceae	Marmoricola	unclassified_Marmoricola	0	0	0	0	0	30	0	11	0	0	0	0	0	0	126	0	0	0	36	71	0	0	0	122	0	0
ASV_825	Bacteria	Bacteroidota	Bacteroidia	Chitinophagales	Saprospiraceae	unclassified_Saprospiraceae	unclassified_Saprospiraceae	0	0	0	0	0	0	0	0	0	0	0	0	0	0	0	0	0	0	0	0	56	0	340	0	0	0
ASV_826	Bacteria	Proteobacteria	Gammaproteobacteria	Xanthomonadales	Xanthomonadaceae	Thermomonas	unclassified_Thermomonas	75	42	13	0	0	0	92	43	0	0	0	0	0	0	90	0	28	12	0	0	0	0	0	0	0	0
ASV_827	Bacteria	Actinobacteriota	Acidimicrobiia	Microtrichales	Iamiaceae	Iamia	unclassified_Iamia	0	0	0	0	0	0	0	0	0	0	0	0	0	0	0	0	0	0	0	64	0	0	0	331	0	0
ASV_828	Bacteria	Proteobacteria	Gammaproteobacteria	Burkholderiales	TRA3-20	unclassified_TRA3-20	unclassified_TRA3-20	62	0	70	0	38	18	33	40	0	0	0	0	28	0	38	0	0	18	0	26	0	0	0	21	0	0
ASV_829	Bacteria	Verrucomicrobiota	Verrucomicrobiae	Pedosphaerales	Pedosphaeraceae	unclassified_Pedosphaeraceae	unclassified_Pedosphaeraceae	44	17	0	0	41	16	57	25	0	0	0	0	0	0	0	109	0	50	0	33	0	0	0	0	0	0
ASV_830	Bacteria	Planctomycetota	Phycisphaerae	Tepidisphaerales	WD2101 soil group	unclassified_WD2101 soil group	unclassified_WD2101 soil group	7	0	32	0	8	21	21	51	0	0	0	0	0	0	57	0	0	22	35	0	0	138	0	0	0	0
ASV_831	Bacteria	Proteobacteria	Alphaproteobacteria	unclassified_Alphaproteobacteria	unclassified_Alphaproteobacteria	unclassified_Alphaproteobacteria	unclassified_Alphaproteobacteria	0	0	0	0	25	0	7	17	0	0	0	0	0	0	0	0	0	0	95	78	143	0	0	27	0	0
ASV_832	Bacteria	Acidobacteriota	Blastocatellia	Pyrinomonadales	Pyrinomonadaceae	RB41	unclassified_RB41	0	0	0	0	0	0	0	87	0	0	0	0	0	0	0	0	0	305	0	0	0	0	0	0	0	0
ASV_833	Bacteria	Planctomycetota	vadinHA49	unclassified_vadinHA49	unclassified_vadinHA49	unclassified_vadinHA49	unclassified_vadinHA49	33	46	0	18	0	0	0	0	0	0	0	7	0	0	0	0	287	0	0	0	0	0	0	0	0	0
ASV_834	Bacteria	Proteobacteria	Alphaproteobacteria	Paracaedibacterales	Paracaedibacteraceae	Candidatus Captivus	unclassified_Candidatus Captivus	0	391	0	0	0	0	0	0	0	0	0	0	0	0	0	0	0	0	0	0	0	0	0	0	0	0
ASV_835	Bacteria	Bacteroidota	Bacteroidia	Chitinophagales	Chitinophagaceae	Parafilimonas	unclassified_Parafilimonas	0	36	0	90	0	0	0	0	107	6	0	87	44	0	0	0	21	0	0	0	0	0	0	0	0	0
ASV_836	Bacteria	Proteobacteria	Gammaproteobacteria	Xanthomonadales	Rhodanobacteraceae	Pseudofulvimonas	unclassified_Pseudofulvimonas	0	0	0	0	0	0	0	0	0	0	0	0	0	0	184	0	0	0	120	0	0	87	0	0	0	0
ASV_837	Bacteria	Verrucomicrobiota	Verrucomicrobiae	Chthoniobacterales	Chthoniobacteraceae	Chthoniobacter	unclassified_Chthoniobacter	64	108	0	126	43	0	0	0	0	0	0	0	0	0	49	0	0	0	0	0	0	0	0	0	0	0
ASV_838	Bacteria	Gemmatimonadota	Gemmatimonadetes	Gemmatimonadales	Gemmatimonadaceae	Gemmatimonas	unclassified_Gemmatimonas	25	125	16	22	0	0	0	0	0	0	0	0	0	0	0	0	189	0	0	0	0	0	0	0	13	0
ASV_839	Bacteria	Bacteroidota	Bacteroidia	Sphingobacteriales	AKYH767	unclassified_AKYH767	unclassified_AKYH767	0	0	0	0	0	0	0	0	0	0	0	0	347	0	0	43	0	0	0	0	0	0	0	0	0	0
ASV_840	Bacteria	Bacteroidota	Bacteroidia	Chitinophagales	unclassified_Chitinophagales	unclassified_Chitinophagales	unclassified_Chitinophagales	84	21	0	26	37	0	0	14	0	0	0	0	0	0	0	34	157	16	0	0	0	0	0	0	0	0
ASV_841	Bacteria	Bacteroidota	Bacteroidia	Cytophagales	unclassified_Cytophagales	unclassified_Cytophagales	unclassified_Cytophagales	12	8	0	0	0	0	114	0	0	0	0	0	0	0	0	248	0	0	0	6	0	0	0	0	0	0
ASV_842	Bacteria	Chloroflexi	Anaerolineae	SBR1031	A4b	unclassified_A4b	unclassified_A4b	10	0	286	10	22	0	45	15	0	0	0	0	0	0	0	0	0	0	0	0	0	0	0	0	0	0
ASV_843	Bacteria	Acidobacteriota	Vicinamibacteria	Vicinamibacterales	Vicinamibacteraceae	unclassified_Vicinamibacteraceae	unclassified_Vicinamibacteraceae	0	0	21	0	35	0	30	19	0	0	0	0	0	0	36	28	16	0	71	0	0	132	0	0	0	0
ASV_844	Bacteria	Verrucomicrobiota	Verrucomicrobiae	Chthoniobacterales	Chthoniobacteraceae	Candidatus Udaeobacter	unclassified_Candidatus Udaeobacter	0	0	0	0	65	0	0	55	0	0	0	0	0	0	0	0	0	0	0	0	0	0	0	0	0	268
ASV_845	Bacteria	Bacteroidota	Bacteroidia	Chitinophagales	Chitinophagaceae	Ferruginibacter	unclassified_Ferruginibacter	31	0	0	47	0	0	0	0	25	5	0	63	43	40	0	118	15	0	0	0	0	0	0	0	0	0
ASV_846	Bacteria	Bacteroidota	Bacteroidia	Chitinophagales	Chitinophagaceae	Flavisolibacter	rigui	0	0	0	0	91	0	0	85	0	0	0	0	0	0	92	0	0	118	0	0	0	0	0	0	0	0
ASV_847	Bacteria	Acidobacteriota	Blastocatellia	Blastocatellales	Blastocatellaceae	Blastocatella	unclassified_Blastocatella	0	0	0	0	0	58	0	0	0	0	0	0	0	0	0	123	0	76	0	60	0	0	0	69	0	0
ASV_848	Bacteria	Planctomycetota	Planctomycetes	Gemmatales	Gemmataceae	unclassified_Gemmataceae	unclassified_Gemmataceae	0	0	0	0	0	0	0	0	0	0	0	0	0	0	0	0	0	0	0	81	0	0	0	303	0	0
ASV_849	Bacteria	Proteobacteria	Gammaproteobacteria	Burkholderiales	A21b	unclassified_A21b	unclassified_A21b	0	0	0	0	37	0	22	0	0	0	0	0	181	22	46	75	0	0	0	0	0	0	0	0	0	0
ASV_850	Bacteria	Actinobacteriota	Thermoleophilia	Gaiellales	unclassified_Gaiellales	unclassified_Gaiellales	unclassified_Gaiellales	0	0	0	0	15	0	5	0	37	4	0	0	21	0	20	9	38	0	41	0	0	27	0	0	0	166
ASV_851	Bacteria	Proteobacteria	Gammaproteobacteria	Legionellales	Legionellaceae	Legionella	unclassified_Legionella	0	0	0	0	0	0	0	0	0	0	0	0	0	0	0	0	0	0	0	0	0	0	382	0	0	0
ASV_852	Bacteria	Bacteroidota	Bacteroidia	Chitinophagales	Chitinophagaceae	Sediminibacterium	unclassified_Sediminibacterium	0	6	0	0	0	0	0	0	7	0	43	142	28	0	0	0	155	0	0	0	0	0	0	0	0	0
ASV_853	Bacteria	Actinobacteriota	Actinobacteria	Micrococcales	Microbacteriaceae	unclassified_Microbacteriaceae	unclassified_Microbacteriaceae	0	0	27	0	354	0	0	0	0	0	0	0	0	0	0	0	0	0	0	0	0	0	0	0	0	0
ASV_854	Bacteria	Gemmatimonadota	Gemmatimonadetes	Gemmatimonadales	Gemmatimonadaceae	unclassified_Gemmatimonadaceae	unclassified_Gemmatimonadaceae	0	0	0	0	0	0	0	0	0	0	0	0	40	234	0	0	0	0	0	0	0	107	0	0	0	0
ASV_855	Bacteria	Verrucomicrobiota	Verrucomicrobiae	Chthoniobacterales	Chthoniobacteraceae	Chthoniobacter	unclassified_Chthoniobacter	65	0	33	0	67	0	112	102	0	0	0	0	0	0	0	0	0	0	0	0	0	0	0	0	0	0
ASV_856	Bacteria	Proteobacteria	Alphaproteobacteria	Rhizobiales	Rhizobiaceae	Allorhizobium-Neorhizobium-Pararhizobium-Rhizobium	unclassified_Allorhizobium-Neorhizobium-Pararhizobium-Rhizobium	0	0	67	0	179	56	54	0	0	0	0	0	22	0	0	0	0	0	0	0	0	0	0	0	0	0
ASV_857	Bacteria	Proteobacteria	Alphaproteobacteria	Rhizobiales	Xanthobacteraceae	unclassified_Xanthobacteraceae	unclassified_Xanthobacteraceae	0	0	0	0	0	0	0	0	0	0	0	0	82	10	0	0	0	0	0	0	0	75	0	0	0	211
ASV_858	Bacteria	Bacteroidota	Kapabacteria	Kapabacteriales	unclassified_Kapabacteriales	unclassified_Kapabacteriales	unclassified_Kapabacteriales	0	100	0	17	0	0	0	0	0	0	48	33	0	7	0	16	151	0	0	0	0	0	0	0	0	5
ASV_859	Bacteria	Bacteroidota	Bacteroidia	Chitinophagales	Chitinophagaceae	Segetibacter	unclassified_Segetibacter	21	0	0	0	33	0	181	35	0	0	0	0	0	0	84	0	0	0	0	11	0	0	0	11	0	0
ASV_860	Bacteria	Actinobacteriota	Rubrobacteria	Rubrobacterales	Rubrobacteriaceae	Rubrobacter	unclassified_Rubrobacter	4	0	7	14	9	0	34	21	0	0	0	0	0	0	0	0	0	0	0	0	32	0	255	0	0	0
ASV_861	Bacteria	Bacteroidota	Bacteroidia	Cytophagales	Hymenobacteraceae	Hymenobacter	unclassified_Hymenobacter	0	0	0	0	0	0	0	0	0	0	0	0	0	0	0	0	0	0	0	0	0	0	0	376	0	0
ASV_862	Bacteria	Verrucomicrobiota	Verrucomicrobiae	Opitutales	Opitutaceae	Opitutus	unclassified_Opitutus	0	0	0	0	0	0	0	0	0	0	0	0	0	0	20	0	0	22	71	66	148	0	48	0	0	0
ASV_863	Bacteria	Actinobacteriota	Acidimicrobiia	Actinomarinales	unclassified_Actinomarinales	unclassified_Actinomarinales	unclassified_Actinomarinales	0	0	0	0	0	0	0	0	0	0	0	0	0	0	0	0	0	9	66	0	0	151	0	0	17	132
ASV_864	Bacteria	Proteobacteria	Gammaproteobacteria	Burkholderiales	Oxalobacteraceae	Noviherbaspirillum	unclassified_Noviherbaspirillum	0	0	0	143	110	0	0	0	0	0	0	0	0	0	0	0	121	0	0	0	0	0	0	0	0	0
ASV_865	Bacteria	Myxococcota	Polyangia	mle1-27	unclassified_mle1-27	unclassified_mle1-27	unclassified_mle1-27	0	0	0	0	0	0	0	0	0	0	0	0	20	341	0	0	0	0	0	0	0	0	0	0	0	13
ASV_866	Bacteria	Bacteroidota	Bacteroidia	Chitinophagales	Chitinophagaceae	Segetibacter	unclassified_Segetibacter	272	27	19	0	0	0	42	0	0	0	0	0	0	0	0	13	0	0	0	0	0	0	0	0	0	0
ASV_867	Bacteria	Acidobacteriota	Blastocatellia	Pyrinomonadales	Pyrinomonadaceae	RB41	unclassified_RB41	28	0	0	0	0	0	54	161	36	0	0	0	0	0	0	26	0	49	19	0	0	0	0	0	0	0
ASV_868	Bacteria	Proteobacteria	Gammaproteobacteria	Burkholderiales	SC-I-84	unclassified_SC-I-84	unclassified_SC-I-84	11	0	0	0	0	0	0	0	0	0	0	0	0	0	0	87	0	0	74	0	0	131	0	0	0	70
ASV_869	Bacteria	RCP2-54	unclassified_RCP2-54	unclassified_RCP2-54	unclassified_RCP2-54	unclassified_RCP2-54	unclassified_RCP2-54	5	0	15	0	10	2	22	41	0	0	0	0	0	0	12	0	6	66	44	0	0	128	0	14	0	8
ASV_870	Bacteria	Acidobacteriota	Blastocatellia	Blastocatellales	Blastocatellaceae	unclassified_Blastocatellaceae	unclassified_Blastocatellaceae	0	43	0	0	0	0	82	132	0	0	0	0	0	0	0	0	52	0	0	0	0	64	0	0	0	0
ASV_871	Bacteria	Actinobacteriota	Thermoleophilia	Gaiellales	Gaiellaceae	Gaiella	unclassified_Gaiella	0	0	0	0	0	0	0	0	0	0	0	0	0	0	0	0	0	0	0	0	373	0	0	0	0	0
ASV_872	Bacteria	Bacteroidota	Bacteroidia	Chitinophagales	Chitinophagaceae	Ferruginibacter	unclassified_Ferruginibacter	0	0	0	136	0	0	0	0	69	0	0	98	69	0	0	0	0	0	0	0	0	0	0	0	0	0
ASV_873	Bacteria	Bacteroidota	Bacteroidia	Sphingobacteriales	AKYH767	unclassified_AKYH767	unclassified_AKYH767	0	0	0	0	0	0	0	0	0	0	0	0	311	0	0	0	0	0	0	0	0	0	0	0	0	61
ASV_874	Bacteria	Chloroflexi	Ktedonobacteria	C0119	unclassified_C0119	unclassified_C0119	unclassified_C0119	0	0	0	0	0	0	12	36	0	0	0	0	0	0	0	0	0	10	87	193	0	0	0	33	0	0
ASV_875	Bacteria	Nitrospirota	Nitrospiria	Nitrospirales	Nitrospiraceae	Nitrospira	unclassified_Nitrospira	0	0	0	0	0	0	0	0	0	0	0	0	0	0	37	0	0	0	26	0	0	0	0	0	15	293
ASV_876	Bacteria	Verrucomicrobiota	Verrucomicrobiae	Chthoniobacterales	Chthoniobacteraceae	Candidatus Udaeobacter	unclassified_Candidatus Udaeobacter	0	0	0	0	0	0	0	0	0	0	0	0	0	0	0	240	0	131	0	0	0	0	0	0	0	0
ASV_877	Bacteria	Gemmatimonadota	S0134 terrestrial group	unclassified_S0134 terrestrial group	unclassified_S0134 terrestrial group	unclassified_S0134 terrestrial group	unclassified_S0134 terrestrial group	0	0	0	0	0	0	0	0	0	0	0	0	0	0	0	0	0	0	0	15	211	0	145	0	0	0
ASV_878	Bacteria	Proteobacteria	Alphaproteobacteria	Rhizobiales	Beijerinckiaceae	Methylocapsa	unclassified_Methylocapsa	0	0	0	0	0	0	0	0	0	0	0	0	0	0	0	292	0	0	12	0	0	66	0	0	0	0
ASV_879	Bacteria	Proteobacteria	Gammaproteobacteria	Burkholderiales	Oxalobacteraceae	Massilia	unclassified_Massilia	92	0	33	48	17	0	0	0	0	0	154	25	0	0	0	0	0	0	0	0	0	0	0	0	0	0
ASV_880	Bacteria	Bacteroidota	Bacteroidia	Chitinophagales	Saprospiraceae	unclassified_Saprospiraceae	unclassified_Saprospiraceae	26	73	137	0	0	0	0	0	0	0	0	24	9	5	35	0	60	0	0	0	0	0	0	0	0	0
ASV_881	Bacteria	Proteobacteria	Gammaproteobacteria	Xanthomonadales	Xanthomonadaceae	Arenimonas	unclassified_Arenimonas	50	0	0	0	0	0	0	0	0	0	0	77	119	122	0	0	0	0	0	0	0	0	0	0	0	0
ASV_882	Bacteria	Cyanobacteria	Cyanobacteriia	Phormidesmiales	Phormidesmiaceae	Phormidesmis ANT.LACV5.1	unclassified_Phormidesmis ANT.LACV5.1	0	0	0	54	0	0	29	0	0	0	0	0	0	0	39	0	0	0	77	0	0	169	0	0	0	0
ASV_883	Bacteria	Bacteroidota	Bacteroidia	Sphingobacteriales	Sphingobacteriaceae	Pedobacter	steynii	157	0	0	0	138	28	0	0	0	0	0	25	0	0	0	0	19	0	0	0	0	0	0	0	0	0
ASV_884	Bacteria	Verrucomicrobiota	Verrucomicrobiae	Chthoniobacterales	Chthoniobacteraceae	Chthoniobacter	unclassified_Chthoniobacter	0	0	66	0	0	0	76	17	11	0	0	0	0	0	157	0	0	0	40	0	0	0	0	0	0	0
ASV_885	Bacteria	Chloroflexi	Ktedonobacteria	C0119	unclassified_C0119	unclassified_C0119	unclassified_C0119	0	0	0	37	0	0	0	0	13	0	58	35	169	30	0	0	25	0	0	0	0	0	0	0	0	0
ASV_886	Bacteria	Planctomycetota	Planctomycetes	Isosphaerales	Isosphaeraceae	unclassified_Isosphaeraceae	unclassified_Isosphaeraceae	0	0	0	0	0	0	0	0	0	0	0	0	0	0	0	0	0	0	0	0	58	0	309	0	0	0
ASV_887	Bacteria	Chloroflexi	Anaerolineae	Caldilineales	Caldilineaceae	unclassified_Caldilineaceae	unclassified_Caldilineaceae	24	90	0	37	0	0	0	0	92	0	0	15	17	11	0	0	80	0	0	0	0	0	0	0	0	0
ASV_888	Bacteria	Bacteroidota	Bacteroidia	Chitinophagales	Chitinophagaceae	Segetibacter	unclassified_Segetibacter	0	0	0	0	198	0	156	10	0	0	0	0	0	0	0	0	0	0	0	0	0	0	0	0	0	0
ASV_889	Bacteria	Acidobacteriota	Vicinamibacteria	Vicinamibacterales	unclassified_Vicinamibacterales	unclassified_Vicinamibacterales	unclassified_Vicinamibacterales	0	0	0	0	0	0	0	0	0	0	0	0	0	0	0	0	0	0	0	0	0	164	0	0	0	200
ASV_890	Bacteria	Actinobacteriota	Actinobacteria	Micrococcales	Intrasporangiaceae	Knoellia	unclassified_Knoellia	87	48	0	177	51	0	0	0	0	0	0	0	0	0	0	0	0	0	0	0	0	0	0	0	0	0
ASV_891	Bacteria	Actinobacteriota	Acidimicrobiia	unclassified_Acidimicrobiia	unclassified_Acidimicrobiia	unclassified_Acidimicrobiia	unclassified_Acidimicrobiia	0	0	0	0	0	0	0	0	0	0	0	0	0	0	0	0	0	0	0	170	70	0	10	113	0	0
ASV_892	Bacteria	Actinobacteriota	Actinobacteria	Euzebyales	Euzebyaceae	Euzebya	unclassified_Euzebya	0	0	0	0	0	0	0	0	0	0	0	0	0	0	0	0	0	0	0	110	0	0	0	253	0	0
ASV_893	Bacteria	Bacteroidota	Bacteroidia	Sphingobacteriales	Sphingobacteriaceae	Arcticibacter	unclassified_Arcticibacter	140	30	0	116	45	0	0	0	0	0	0	0	0	0	0	0	31	0	0	0	0	0	0	0	0	0
ASV_894	Bacteria	Bacteroidota	Bacteroidia	Chitinophagales	Chitinophagaceae	unclassified_Chitinophagaceae	unclassified_Chitinophagaceae	98	0	0	0	32	0	15	126	0	0	0	0	0	0	0	0	19	0	0	0	0	0	0	0	34	38
ASV_895	Bacteria	Acidobacteriota	Acidobacteriae	Paludibaculum	unclassified_Paludibaculum	unclassified_Paludibaculum	unclassified_Paludibaculum	59	0	0	0	0	0	0	6	0	0	0	0	68	0	24	24	169	0	0	12	0	0	0	0	0	0
ASV_896	Bacteria	Acidobacteriota	Vicinamibacteria	Vicinamibacterales	unclassified_Vicinamibacterales	unclassified_Vicinamibacterales	unclassified_Vicinamibacterales	0	31	40	131	0	9	25	15	11	0	0	0	0	0	0	0	100	0	0	0	0	0	0	0	0	0
ASV_897	Bacteria	Actinobacteriota	Actinobacteria	Micrococcales	Intrasporangiaceae	Ornithinicoccus	unclassified_Ornithinicoccus	0	0	0	0	0	0	0	0	0	0	0	0	0	0	0	0	0	0	0	102	0	0	0	260	0	0
ASV_898	Bacteria	Proteobacteria	unclassified_Proteobacteria	unclassified_Proteobacteria	unclassified_Proteobacteria	unclassified_Proteobacteria	unclassified_Proteobacteria	12	43	70	14	12	11	44	59	0	0	0	5	0	0	49	39	0	3	0	0	0	0	0	0	0	0
ASV_899	Bacteria	Bacteroidota	Bacteroidia	Chitinophagales	Chitinophagaceae	Flavisolibacter	unclassified_Flavisolibacter	0	0	0	123	0	0	0	44	0	7	0	16	0	0	0	147	0	24	0	0	0	0	0	0	0	0
ASV_900	Bacteria	Proteobacteria	Gammaproteobacteria	Burkholderiales	Comamonadaceae	unclassified_Comamonadaceae	unclassified_Comamonadaceae	78	0	18	112	120	0	32	0	0	0	0	0	0	0	0	0	0	0	0	0	0	0	0	0	0	0
ASV_901	Bacteria	Acidobacteriota	Holophagae	Subgroup 7	unclassified_Subgroup 7	unclassified_Subgroup 7	unclassified_Subgroup 7	0	0	0	0	46	0	44	22	0	0	0	0	0	0	46	33	0	69	0	0	0	100	0	0	0	0
ASV_902	Bacteria	Actinobacteriota	Thermoleophilia	Solirubrobacterales	67-14	unclassified_67-14	unclassified_67-14	0	0	0	0	0	0	26	33	0	0	0	0	0	0	301	0	0	0	0	0	0	0	0	0	0	0
ASV_903	Bacteria	Cyanobacteria	Cyanobacteriia	Phormidesmiales	Phormidesmiaceae	Phormidesmis ANT.LACV5.1	unclassified_Phormidesmis ANT.LACV5.1	0	0	0	0	0	0	0	0	0	0	0	0	0	0	0	0	0	0	0	0	360	0	0	0	0	0
ASV_904	Bacteria	Actinobacteriota	Actinobacteria	Propionibacteriales	Nocardioidaceae	Kribbella	unclassified_Kribbella	0	0	28	8	37	0	17	19	0	0	0	0	0	0	52	130	0	61	7	0	0	0	0	0	0	0
ASV_905	Bacteria	Verrucomicrobiota	Verrucomicrobiae	Pedosphaerales	Pedosphaeraceae	unclassified_Pedosphaeraceae	unclassified_Pedosphaeraceae	0	0	0	0	0	0	0	0	0	0	0	0	0	0	0	0	0	0	0	0	116	0	242	0	0	0
ASV_906	Bacteria	Bacteroidota	Bacteroidia	Cytophagales	MWH-CFBk5	unclassified_MWH-CFBk5	unclassified_MWH-CFBk5	26	0	0	13	0	8	263	0	0	0	0	0	0	0	0	0	0	7	15	0	25	0	0	0	0	0
ASV_907	Bacteria	Cyanobacteria	Cyanobacteriia	Phormidesmiales	Phormidesmiaceae	Phormidesmis ANT.LACV5.1	unclassified_Phormidesmis ANT.LACV5.1	0	0	0	0	0	0	0	0	0	0	0	0	0	0	0	0	0	0	0	0	357	0	0	0	0	0
ASV_908	Bacteria	Bacteroidota	Bacteroidia	Cytophagales	Cyclobacteriaceae	Tunicatimonas	unclassified_Tunicatimonas	0	0	13	0	9	8	23	12	0	0	0	0	0	0	26	0	0	30	37	43	0	12	0	143	0	0
ASV_909	Bacteria	Actinobacteriota	Actinobacteria	Propionibacteriales	unclassified_Propionibacteriales	unclassified_Propionibacteriales	unclassified_Propionibacteriales	0	0	0	0	141	0	79	0	0	0	0	0	0	0	136	0	0	0	0	0	0	0	0	0	0	0
ASV_910	Bacteria	Proteobacteria	Alphaproteobacteria	Sphingomonadales	Sphingomonadaceae	Sphingobium	yanoikuyae	0	0	0	0	0	0	0	0	0	0	356	0	0	0	0	0	0	0	0	0	0	0	0	0	0	0
ASV_911	Bacteria	Actinobacteriota	Thermoleophilia	Solirubrobacterales	Solirubrobacteraceae	unclassified_Solirubrobacteraceae	unclassified_Solirubrobacteraceae	7	6	16	0	14	52	33	58	0	0	0	0	0	0	34	0	25	45	31	0	0	34	0	0	0	0
ASV_912	Bacteria	Abditibacteriota	Abditibacteria	Abditibacteriales	Abditibacteriaceae	Abditibacterium	unclassified_Abditibacterium	0	0	31	0	21	21	31	57	0	0	0	0	0	0	54	19	18	39	14	13	0	0	0	37	0	0
ASV_913	Bacteria	Gemmatimonadota	Gemmatimonadetes	Gemmatimonadales	Gemmatimonadaceae	Gemmatimonas	unclassified_Gemmatimonas	0	0	14	0	57	0	0	0	0	0	0	0	0	0	0	0	0	41	100	0	0	0	0	0	0	143
ASV_914	Bacteria	Chloroflexi	KD4-96	unclassified_KD4-96	unclassified_KD4-96	unclassified_KD4-96	unclassified_KD4-96	0	0	0	0	72	0	29	106	0	0	0	0	0	0	31	0	0	117	0	0	0	0	0	0	0	0
ASV_915	Bacteria	Bacteroidota	Kapabacteria	Kapabacteriales	unclassified_Kapabacteriales	unclassified_Kapabacteriales	unclassified_Kapabacteriales	0	0	0	4	0	0	0	0	129	8	35	147	2	0	0	0	29	0	0	0	0	0	0	0	0	0
ASV_916	Bacteria	Proteobacteria	Gammaproteobacteria	Burkholderiales	Oxalobacteraceae	unclassified_Oxalobacteraceae	unclassified_Oxalobacteraceae	0	0	0	0	0	0	0	0	297	14	0	43	0	0	0	0	0	0	0	0	0	0	0	0	0	0
ASV_917	Bacteria	Chloroflexi	Chloroflexia	Thermomicrobiales	JG30-KF-CM45	unclassified_JG30-KF-CM45	unclassified_JG30-KF-CM45	34	92	0	48	0	0	0	0	57	0	3	26	0	0	0	0	93	0	0	0	0	0	0	0	0	0
ASV_918	Bacteria	Actinobacteriota	Rubrobacteria	Rubrobacterales	Rubrobacteriaceae	Rubrobacter	unclassified_Rubrobacter	0	0	0	0	0	30	0	35	0	0	0	0	0	0	0	42	0	142	44	0	0	60	0	0	0	0
ASV_919	Bacteria	Chloroflexi	KD4-96	unclassified_KD4-96	unclassified_KD4-96	unclassified_KD4-96	unclassified_KD4-96	0	0	0	0	0	0	14	77	0	0	0	0	0	0	52	157	0	22	0	0	0	0	0	31	0	0
ASV_920	Bacteria	Acidobacteriota	Subgroup 11	unclassified_Subgroup 11	unclassified_Subgroup 11	unclassified_Subgroup 11	unclassified_Subgroup 11	0	0	0	0	0	0	0	0	0	0	0	0	0	0	3	0	0	0	25	0	0	67	0	0	6	252
ASV_921	Bacteria	Acidobacteriota	Blastocatellia	Blastocatellales	Blastocatellaceae	Blastocatella	unclassified_Blastocatella	46	14	73	19	0	0	25	10	0	0	0	0	18	0	44	12	0	29	45	0	0	17	0	0	0	0
ASV_922	Bacteria	Myxococcota	Polyangia	Nannocystales	Nannocystaceae	Nannocystis	unclassified_Nannocystis	27	0	95	0	0	0	83	51	0	0	0	0	0	0	82	0	0	14	0	0	0	0	0	0	0	0
ASV_923	Bacteria	Acidobacteriota	Vicinamibacteria	Vicinamibacterales	Vicinamibacteraceae	unclassified_Vicinamibacteraceae	unclassified_Vicinamibacteraceae	20	0	21	0	67	0	26	50	0	0	0	0	0	0	0	25	0	70	26	7	0	15	0	0	8	17
ASV_924	Bacteria	Bacteroidota	Bacteroidia	Chitinophagales	Saprospiraceae	Phaeodactylibacter	unclassified_Phaeodactylibacter	6	8	0	0	0	0	0	11	0	0	0	35	147	103	0	0	20	0	5	0	0	15	0	0	0	0
ASV_925	Bacteria	Proteobacteria	Gammaproteobacteria	Burkholderiales	Comamonadaceae	unclassified_Comamonadaceae	unclassified_Comamonadaceae	0	0	0	0	0	0	0	0	0	0	0	0	0	0	135	0	0	0	182	0	0	33	0	0	0	0
ASV_926	Bacteria	Methylomirabilota	Methylomirabilia	Rokubacteriales	unclassified_Rokubacteriales	unclassified_Rokubacteriales	unclassified_Rokubacteriales	0	0	0	0	0	0	0	0	0	0	0	0	42	0	0	0	0	0	9	0	0	0	0	0	39	259
ASV_927	Bacteria	Cyanobacteria	Cyanobacteriia	Phormidesmiales	Nodosilineaceae	Nodosilinea PCC-7104	unclassified_Nodosilinea PCC-7104	0	0	0	0	0	0	0	0	0	0	0	0	0	0	209	0	0	0	140	0	0	0	0	0	0	0
ASV_928	Bacteria	Chloroflexi	Ktedonobacteria	C0119	unclassified_C0119	unclassified_C0119	unclassified_C0119	0	0	0	0	0	0	0	0	8	0	13	326	0	0	0	0	0	0	0	0	0	0	0	0	0	0
ASV_929	Bacteria	Actinobacteriota	Acidimicrobiia	unclassified_Acidimicrobiia	unclassified_Acidimicrobiia	unclassified_Acidimicrobiia	unclassified_Acidimicrobiia	0	0	0	0	0	0	44	18	0	0	0	0	0	0	53	0	0	18	49	93	0	18	26	27	0	0
ASV_930	Bacteria	Actinobacteriota	Acidimicrobiia	IMCC26256	unclassified_IMCC26256	unclassified_IMCC26256	unclassified_IMCC26256	0	0	0	0	0	0	0	0	0	0	0	20	241	85	0	0	0	0	0	0	0	0	0	0	0	0
ASV_931	Bacteria	Bdellovibrionota	Bdellovibrionia	Bdellovibrionales	Bdellovibrionaceae	Bdellovibrio	exovorus	27	7	10	0	0	0	12	0	0	0	12	49	70	56	0	14	88	0	0	0	0	0	0	0	0	0
ASV_932	Bacteria	Bacteroidota	Bacteroidia	Sphingobacteriales	Sphingobacteriaceae	Pedobacter	unclassified_Pedobacter	64	14	0	7	44	0	90	25	0	0	0	0	0	0	15	21	0	24	23	6	0	0	0	0	0	11
ASV_933	Bacteria	Proteobacteria	Alphaproteobacteria	Rhizobiales	Xanthobacteraceae	Bradyrhizobium	unclassified_Bradyrhizobium	0	50	0	75	0	0	0	0	0	0	43	0	0	49	0	0	127	0	0	0	0	0	0	0	0	0
ASV_934	Bacteria	Acidobacteriota	Blastocatellia	Pyrinomonadales	Pyrinomonadaceae	RB41	unclassified_RB41	0	0	0	0	0	0	0	0	0	0	0	0	0	0	0	178	0	166	0	0	0	0	0	0	0	0
ASV_935	Bacteria	Bacteroidota	Bacteroidia	Chitinophagales	Chitinophagaceae	Ferruginibacter	unclassified_Ferruginibacter	59	18	0	0	15	0	0	0	0	0	0	0	0	0	27	41	183	0	0	0	0	0	0	0	0	0
ASV_936	Bacteria	Verrucomicrobiota	Verrucomicrobiae	Chthoniobacterales	Chthoniobacteraceae	Candidatus Udaeobacter	unclassified_Candidatus Udaeobacter	0	0	0	0	55	0	0	53	0	0	0	0	0	0	105	0	0	0	115	0	0	15	0	0	0	0
ASV_937	Bacteria	Planctomycetota	OM190	unclassified_OM190	unclassified_OM190	unclassified_OM190	unclassified_OM190	0	0	0	0	0	0	0	0	0	0	0	0	0	0	0	0	0	0	0	0	343	0	0	0	0	0
ASV_938	Bacteria	Chloroflexi	Chloroflexia	Chloroflexales	Roseiflexaceae	unclassified_Roseiflexaceae	unclassified_Roseiflexaceae	0	0	0	0	32	7	0	0	0	0	0	0	0	0	60	46	0	67	0	0	0	130	0	0	0	0
ASV_939	Bacteria	Bacteroidota	Bacteroidia	Chitinophagales	Chitinophagaceae	Terrimonas	unclassified_Terrimonas	0	0	0	0	0	0	0	0	25	0	0	112	105	15	0	0	0	0	50	0	0	35	0	0	0	0
ASV_940	Bacteria	Verrucomicrobiota	Verrucomicrobiae	Chthoniobacterales	Chthoniobacteraceae	Candidatus Udaeobacter	unclassified_Candidatus Udaeobacter	0	0	0	0	0	0	0	0	0	0	0	0	0	0	0	0	0	0	0	203	0	0	0	139	0	0
ASV_941	Bacteria	Proteobacteria	Alphaproteobacteria	Sphingomonadales	Sphingomonadaceae	Qipengyuania	unclassified_Qipengyuania	0	0	0	0	32	25	70	142	0	0	0	0	0	0	0	0	0	57	0	0	0	0	0	15	0	0
ASV_942	Bacteria	Proteobacteria	Alphaproteobacteria	Sphingomonadales	Sphingomonadaceae	Erythrobacter	unclassified_Erythrobacter	0	0	0	0	0	0	0	0	0	0	0	0	0	0	0	0	0	0	89	0	164	65	23	0	0	0
ASV_943	Bacteria	Cyanobacteria	Cyanobacteriia	Phormidesmiales	Phormidesmiaceae	Phormidesmis ANT.LACV5.1	unclassified_Phormidesmis ANT.LACV5.1	0	0	0	0	0	0	0	0	0	0	0	0	0	0	0	0	0	0	0	0	341	0	0	0	0	0
ASV_944	Bacteria	Bacteroidota	Bacteroidia	Sphingobacteriales	env.OPS 17	unclassified_env.OPS 17	unclassified_env.OPS 17	29	6	60	36	37	0	19	16	0	0	19	10	0	0	0	0	75	0	0	0	0	29	0	0	4	0
ASV_945	Bacteria	Proteobacteria	Alphaproteobacteria	Rhizobiales	Devosiaceae	Devosia	unclassified_Devosia	0	0	0	34	0	0	0	0	0	0	0	17	266	0	0	0	23	0	0	0	0	0	0	0	0	0
ASV_946	Bacteria	Proteobacteria	Gammaproteobacteria	Pseudomonadales	Pseudomonadaceae	Pseudomonas	unclassified_Pseudomonas	0	0	0	0	0	0	0	0	0	0	0	0	0	330	0	0	0	0	0	0	0	0	0	0	10	0
ASV_947	Bacteria	Armatimonadota	Armatimonadia	Armatimonadales	unclassified_Armatimonadales	unclassified_Armatimonadales	unclassified_Armatimonadales	50	70	0	90	0	13	0	0	31	3	0	0	17	0	0	0	65	0	0	0	0	0	0	0	0	0
ASV_948	Bacteria	Actinobacteriota	Thermoleophilia	Solirubrobacterales	Solirubrobacteraceae	Conexibacter	unclassified_Conexibacter	0	0	0	0	0	0	0	262	0	0	0	0	0	0	0	77	0	0	0	0	0	0	0	0	0	0
ASV_949	Bacteria	Chloroflexi	Chloroflexia	Chloroflexales	Roseiflexaceae	unclassified_Roseiflexaceae	unclassified_Roseiflexaceae	8	0	66	0	0	0	49	31	10	0	0	0	0	4	0	0	57	20	56	0	0	37	0	0	0	0
ASV_950	Bacteria	Chloroflexi	KD4-96	unclassified_KD4-96	unclassified_KD4-96	unclassified_KD4-96	unclassified_KD4-96	0	0	0	0	80	0	0	119	0	0	0	0	0	0	69	0	0	70	0	0	0	0	0	0	0	0
ASV_951	Bacteria	Actinobacteriota	Rubrobacteria	Rubrobacterales	Rubrobacteriaceae	Rubrobacter	unclassified_Rubrobacter	0	0	0	0	0	0	0	0	0	0	0	0	0	0	0	82	0	176	0	0	6	74	0	0	0	0
ASV_952	Bacteria	Actinobacteriota	Thermoleophilia	Solirubrobacterales	67-14	unclassified_67-14	unclassified_67-14	16	113	0	30	0	0	0	0	29	0	0	0	23	0	0	0	126	0	0	0	0	0	0	0	0	0
ASV_953	Bacteria	Bacteroidota	Bacteroidia	Flavobacteriales	Cryomorphaceae	Cryomorpha	unclassified_Cryomorpha	0	0	15	0	0	0	0	11	0	0	0	0	0	0	0	0	0	0	146	0	141	24	0	0	0	0
ASV_954	Bacteria	Actinobacteriota	Actinobacteria	Micrococcales	Intrasporangiaceae	Knoellia	unclassified_Knoellia	0	0	0	153	0	0	0	0	0	0	0	0	0	0	0	0	184	0	0	0	0	0	0	0	0	0
ASV_955	Bacteria	Verrucomicrobiota	Verrucomicrobiae	Pedosphaerales	Pedosphaeraceae	SH3-11	unclassified_SH3-11	0	0	0	0	0	0	0	0	0	0	31	42	204	60	0	0	0	0	0	0	0	0	0	0	0	0
ASV_956	Bacteria	Verrucomicrobiota	Verrucomicrobiae	Verrucomicrobiales	Rubritaleaceae	Luteolibacter	unclassified_Luteolibacter	0	34	0	0	0	0	0	26	0	0	0	0	0	0	0	0	0	0	154	0	0	122	0	0	0	0
ASV_957	Bacteria	Acidobacteriota	Blastocatellia	Pyrinomonadales	Pyrinomonadaceae	RB41	unclassified_RB41	0	0	0	0	0	0	0	0	32	14	0	82	131	77	0	0	0	0	0	0	0	0	0	0	0	0
ASV_958	Bacteria	Chloroflexi	KD4-96	unclassified_KD4-96	unclassified_KD4-96	unclassified_KD4-96	unclassified_KD4-96	0	0	0	0	0	0	0	0	0	0	0	0	0	0	78	0	0	0	25	0	0	0	0	0	0	233
ASV_959	Bacteria	Verrucomicrobiota	Verrucomicrobiae	Chthoniobacterales	Chthoniobacteraceae	Chthoniobacter	unclassified_Chthoniobacter	0	0	0	269	52	0	0	0	0	0	0	0	0	0	0	14	0	0	0	0	0	0	0	0	0	0
ASV_960	Bacteria	Verrucomicrobiota	Verrucomicrobiae	Chthoniobacterales	Chthoniobacteraceae	Chthoniobacter	unclassified_Chthoniobacter	0	0	0	0	26	44	0	99	0	0	0	0	0	0	166	0	0	0	0	0	0	0	0	0	0	0
ASV_961	Bacteria	Proteobacteria	Alphaproteobacteria	Rhizobiales	Hyphomicrobiaceae	Hyphomicrobium	unclassified_Hyphomicrobium	0	0	0	0	0	0	0	0	20	15	0	41	155	35	0	0	68	0	0	0	0	0	0	0	0	0
ASV_962	Bacteria	Verrucomicrobiota	Verrucomicrobiae	Pedosphaerales	Pedosphaeraceae	Pedosphaera	unclassified_Pedosphaera	0	0	0	0	0	0	0	0	0	0	0	0	0	0	151	183	0	0	0	0	0	0	0	0	0	0
ASV_963	Bacteria	Bacteroidota	Bacteroidia	Sphingobacteriales	S15-21	unclassified_S15-21	unclassified_S15-21	0	0	0	0	0	0	0	0	0	0	0	0	0	0	0	0	0	0	0	54	57	0	0	223	0	0
ASV_964	Bacteria	Planctomycetota	Phycisphaerae	Phycisphaerales	Phycisphaeraceae	SM1A02	unclassified_SM1A02	0	0	0	0	0	0	0	0	14	0	250	69	0	0	0	0	0	0	0	0	0	0	0	0	0	0
ASV_965	Bacteria	Proteobacteria	Alphaproteobacteria	Sphingomonadales	Sphingomonadaceae	Rhizorhapis	unclassified_Rhizorhapis	9	0	0	0	23	0	0	0	0	0	0	0	0	0	300	0	0	0	0	0	0	0	0	0	0	0
ASV_966	Bacteria	Proteobacteria	Gammaproteobacteria	Burkholderiales	Comamonadaceae	Variovorax	boronicumulans	0	111	0	0	0	0	0	0	0	0	0	117	0	63	41	0	0	0	0	0	0	0	0	0	0	0
ASV_967	Bacteria	Bacteroidota	Rhodothermia	Balneolales	Balneolaceae	unclassified_Balneolaceae	unclassified_Balneolaceae	0	0	0	0	0	0	0	0	0	0	0	0	0	0	0	0	0	0	0	0	0	0	332	0	0	0
ASV_968	Bacteria	Actinobacteriota	Acidimicrobiia	Actinomarinales	unclassified_Actinomarinales	unclassified_Actinomarinales	unclassified_Actinomarinales	0	0	0	0	0	0	0	0	0	0	0	0	0	0	0	0	0	0	0	37	160	0	0	134	0	0
ASV_969	Bacteria	Chloroflexi	unclassified_Chloroflexi	unclassified_Chloroflexi	unclassified_Chloroflexi	unclassified_Chloroflexi	unclassified_Chloroflexi	20	0	11	5	39	7	38	38	0	0	0	0	0	0	14	17	10	28	0	0	0	103	0	0	0	0
ASV_970	Bacteria	Chloroflexi	KD4-96	unclassified_KD4-96	unclassified_KD4-96	unclassified_KD4-96	unclassified_KD4-96	0	0	0	0	0	0	0	0	0	0	0	0	0	0	0	0	0	0	0	0	143	0	187	0	0	0
ASV_971	Bacteria	Bacteroidota	Bacteroidia	Cytophagales	Microscillaceae	Chryseolinea	unclassified_Chryseolinea	0	0	83	0	0	0	41	106	0	0	0	0	0	0	0	0	0	11	17	0	0	69	0	0	0	0
ASV_972	Bacteria	Acidobacteriota	Blastocatellia	Blastocatellales	Blastocatellaceae	JGI 0001001-H03	unclassified_JGI 0001001-H03	0	0	0	0	28	0	0	28	0	0	0	0	0	0	190	0	0	0	0	0	0	81	0	0	0	0
ASV_973	Bacteria	Verrucomicrobiota	Verrucomicrobiae	Chthoniobacterales	Chthoniobacteraceae	Candidatus Udaeobacter	unclassified_Candidatus Udaeobacter	0	0	0	0	0	0	0	0	0	0	0	0	0	0	72	139	0	0	0	0	0	116	0	0	0	0
ASV_974	Bacteria	Cyanobacteria	Cyanobacteriia	Phormidesmiales	Phormidesmiaceae	Phormidesmis ANT.LACV5.1	unclassified_Phormidesmis ANT.LACV5.1	0	0	0	86	0	0	95	0	0	0	0	0	0	0	34	0	0	38	0	0	42	31	0	0	0	0
ASV_975	Bacteria	Proteobacteria	Alphaproteobacteria	Rhizobiales	unclassified_Rhizobiales	unclassified_Rhizobiales	unclassified_Rhizobiales	0	0	0	0	0	0	0	0	0	0	0	0	0	0	0	0	0	0	0	92	0	0	0	234	0	0
ASV_976	Bacteria	Acidobacteriota	Holophagae	Subgroup 7	unclassified_Subgroup 7	unclassified_Subgroup 7	unclassified_Subgroup 7	0	0	0	0	0	0	0	0	0	0	0	0	0	0	0	0	0	0	0	0	0	137	0	0	0	187
ASV_977	Bacteria	Proteobacteria	Alphaproteobacteria	Acetobacterales	Acetobacteraceae	Roseomonas	frigidaquae	0	0	0	0	0	0	0	0	103	0	64	61	0	0	58	0	0	0	25	0	12	0	0	0	0	0
ASV_978	Bacteria	Actinobacteriota	Acidimicrobiia	Microtrichales	Iamiaceae	Iamia	unclassified_Iamia	17	53	0	0	0	0	0	0	80	43	18	45	18	0	0	0	48	0	0	0	0	0	0	0	0	0
ASV_979	Bacteria	Bdellovibrionota	Oligoflexia	053A03-B-DI-P58	unclassified_053A03-B-DI-P58	unclassified_053A03-B-DI-P58	unclassified_053A03-B-DI-P58	0	0	5	0	0	0	5	8	266	0	10	9	8	8	0	3	0	0	0	0	0	0	0	0	0	0
ASV_980	Bacteria	Proteobacteria	Alphaproteobacteria	Sphingomonadales	Sphingomonadaceae	Sphingomonas	glacialis	0	0	0	92	0	0	0	0	64	0	99	47	20	0	0	0	0	0	0	0	0	0	0	0	0	0
ASV_981	Bacteria	Bacteroidota	Bacteroidia	Chitinophagales	Chitinophagaceae	Ferruginibacter	unclassified_Ferruginibacter	0	0	0	0	0	0	0	0	0	0	0	54	212	56	0	0	0	0	0	0	0	0	0	0	0	0
ASV_982	Bacteria	Acidobacteriota	Blastocatellia	Blastocatellales	Blastocatellaceae	JGI 0001001-H03	unclassified_JGI 0001001-H03	0	0	0	0	0	0	0	86	0	0	0	0	0	0	235	0	0	0	0	0	0	0	0	0	0	0
ASV_983	Bacteria	Chloroflexi	TK10	unclassified_TK10	unclassified_TK10	unclassified_TK10	unclassified_TK10	0	0	0	0	28	5	11	66	15	0	0	0	0	0	0	0	4	95	35	9	0	52	0	0	0	0
ASV_984	Bacteria	Cyanobacteria	Cyanobacteriia	Cyanobacteriales	Phormidiaceae	Tychonema CCAP 1459-11B	unclassified_Tychonema CCAP 1459-11B	0	0	0	0	10	0	94	0	0	0	0	0	0	0	0	28	0	0	188	0	0	0	0	0	0	0
ASV_985	Bacteria	Bacteroidota	Bacteroidia	Chitinophagales	Chitinophagaceae	Ferruginibacter	unclassified_Ferruginibacter	35	74	0	0	0	0	0	0	0	49	0	0	38	0	0	0	123	0	0	0	0	0	0	0	0	0
ASV_986	Bacteria	Acidobacteriota	Acidobacteriae	Bryobacterales	Bryobacteraceae	Bryobacter	unclassified_Bryobacter	17	0	14	14	34	13	30	26	0	0	0	0	0	0	33	35	0	44	0	0	0	59	0	0	0	0
ASV_987	Bacteria	Proteobacteria	Alphaproteobacteria	Elsterales	unclassified_Elsterales	unclassified_Elsterales	unclassified_Elsterales	0	0	0	0	0	0	0	0	0	0	0	0	6	0	18	6	0	10	26	0	0	0	0	0	17	236
ASV_988	Bacteria	Chloroflexi	Gitt-GS-136	unclassified_Gitt-GS-136	unclassified_Gitt-GS-136	unclassified_Gitt-GS-136	unclassified_Gitt-GS-136	0	0	0	0	0	0	0	0	0	0	0	0	0	0	0	0	0	0	27	0	0	35	0	0	0	257
ASV_989	Bacteria	Proteobacteria	Alphaproteobacteria	Reyranellales	Reyranellaceae	Reyranella	unclassified_Reyranella	0	12	0	0	4	0	0	0	137	17	62	48	0	0	0	0	37	0	0	0	0	0	0	0	0	0
ASV_990	Bacteria	Bacteroidota	Bacteroidia	Cytophagales	Microscillaceae	unclassified_Microscillaceae	unclassified_Microscillaceae	0	0	0	0	0	0	0	0	133	56	18	40	0	0	0	0	70	0	0	0	0	0	0	0	0	0
ASV_991	Bacteria	Actinobacteriota	Rubrobacteria	Rubrobacterales	Rubrobacteriaceae	Rubrobacter	unclassified_Rubrobacter	0	0	0	0	0	0	0	0	0	0	0	0	0	0	0	72	0	149	35	0	0	61	0	0	0	0
ASV_992	Bacteria	Proteobacteria	Alphaproteobacteria	Rhizobiales	Devosiaceae	Devosia	unclassified_Devosia	111	28	121	0	56	0	0	0	0	0	0	0	0	0	0	0	0	0	0	0	0	0	0	0	0	0
ASV_993	Bacteria	Actinobacteriota	Actinobacteria	Kineosporiales	Kineosporiaceae	Kineosporia	unclassified_Kineosporia	79	19	64	16	0	13	36	24	0	0	0	0	0	0	37	0	0	0	28	0	0	0	0	0	0	0
ASV_994	Bacteria	Acidobacteriota	Blastocatellia	Blastocatellales	Blastocatellaceae	JGI 0001001-H03	unclassified_JGI 0001001-H03	32	28	9	0	0	0	0	0	0	0	33	28	0	0	0	22	163	0	0	0	0	0	0	0	0	0
ASV_995	Bacteria	Verrucomicrobiota	Verrucomicrobiae	Opitutales	Opitutaceae	Opitutus	unclassified_Opitutus	0	0	0	0	0	0	0	0	31	0	0	22	0	0	0	0	20	21	34	145	0	42	0	0	0	0
ASV_996	Bacteria	Verrucomicrobiota	Chlamydiae	Chlamydiales	Parachlamydiaceae	Neochlamydia	unclassified_Neochlamydia	0	0	0	0	0	0	0	0	29	11	0	13	234	28	0	0	0	0	0	0	0	0	0	0	0	0
ASV_997	Bacteria	Acidobacteriota	Vicinamibacteria	Vicinamibacterales	unclassified_Vicinamibacterales	unclassified_Vicinamibacterales	unclassified_Vicinamibacterales	0	0	0	0	0	0	0	0	0	0	0	0	0	0	0	246	0	0	0	0	0	69	0	0	0	0
ASV_998	Bacteria	Chloroflexi	Ktedonobacteria	C0119	unclassified_C0119	unclassified_C0119	unclassified_C0119	0	45	0	0	0	0	0	0	70	25	0	63	0	0	0	0	111	0	0	0	0	0	0	0	0	0
ASV_999	Bacteria	Proteobacteria	Alphaproteobacteria	Rhizobiales	Xanthobacteraceae	Afipia	unclassified_Afipia	0	24	0	0	0	0	0	0	0	0	0	0	0	88	0	0	188	0	0	0	0	0	0	0	0	13
ASV_1000	Bacteria	Chloroflexi	JG30-KF-CM66	unclassified_JG30-KF-CM66	unclassified_JG30-KF-CM66	unclassified_JG30-KF-CM66	unclassified_JG30-KF-CM66	0	0	0	0	0	23	0	24	0	0	0	0	0	0	31	126	0	24	0	21	0	64	0	0	0	0
ASV_1001	Bacteria	Verrucomicrobiota	Verrucomicrobiae	Pedosphaerales	Pedosphaeraceae	unclassified_Pedosphaeraceae	unclassified_Pedosphaeraceae	0	0	0	0	0	0	49	0	0	0	0	0	0	0	28	46	0	0	0	0	0	190	0	0	0	0
ASV_1002	Bacteria	Proteobacteria	Alphaproteobacteria	Sphingomonadales	Sphingomonadaceae	Novosphingobium	unclassified_Novosphingobium	0	0	0	0	0	0	0	0	0	0	0	88	182	43	0	0	0	0	0	0	0	0	0	0	0	0
ASV_1003	Bacteria	Chloroflexi	Chloroflexia	Thermomicrobiales	JG30-KF-CM45	unclassified_JG30-KF-CM45	unclassified_JG30-KF-CM45	0	0	0	0	53	0	33	104	37	0	0	0	0	0	0	0	59	0	0	26	0	0	0	0	0	0
ASV_1004	Bacteria	Chloroflexi	Chloroflexia	Thermomicrobiales	JG30-KF-CM45	unclassified_JG30-KF-CM45	unclassified_JG30-KF-CM45	0	0	0	0	0	0	0	0	0	0	0	0	0	0	0	0	0	0	0	14	122	0	151	25	0	0
ASV_1005	Bacteria	Bacteroidota	Bacteroidia	Chitinophagales	Chitinophagaceae	Ferruginibacter	unclassified_Ferruginibacter	26	105	0	114	0	0	0	0	48	0	0	0	0	0	0	18	0	0	0	0	0	0	0	0	0	0
ASV_1006	Archaea	Crenarchaeota	Nitrososphaeria	Nitrososphaerales	Nitrososphaeraceae	Candidatus Nitrocosmicus	unclassified_Candidatus Nitrocosmicus	0	0	0	0	0	0	0	0	0	0	0	0	0	0	0	311	0	0	0	0	0	0	0	0	0	0
ASV_1007	Bacteria	Bacteroidota	Bacteroidia	Sphingobacteriales	AKYH767	unclassified_AKYH767	unclassified_AKYH767	48	0	0	0	0	0	0	0	0	0	0	0	0	21	0	0	230	0	0	0	0	11	0	0	0	0
ASV_1008	Bacteria	Planctomycetota	vadinHA49	unclassified_vadinHA49	unclassified_vadinHA49	unclassified_vadinHA49	unclassified_vadinHA49	0	0	86	0	0	0	0	0	0	0	0	0	0	0	0	0	0	38	63	0	86	37	0	0	0	0
ASV_1009	Bacteria	Acidobacteriota	Vicinamibacteria	Vicinamibacterales	Vicinamibacteraceae	unclassified_Vicinamibacteraceae	unclassified_Vicinamibacteraceae	0	0	24	0	54	0	26	49	0	0	0	0	0	0	22	0	0	42	93	0	0	0	0	0	0	0
ASV_1010	Bacteria	Actinobacteriota	Actinobacteria	Propionibacteriales	Nocardioidaceae	Marmoricola	unclassified_Marmoricola	0	0	0	0	25	61	30	34	0	0	0	0	0	0	0	0	0	160	0	0	0	0	0	0	0	0
ASV_1011	Bacteria	Proteobacteria	Alphaproteobacteria	Rhizobiales	Xanthobacteraceae	Rhodopseudomonas	unclassified_Rhodopseudomonas	0	0	0	0	0	0	0	0	0	0	210	100	0	0	0	0	0	0	0	0	0	0	0	0	0	0
ASV_1012	Bacteria	Actinobacteriota	Actinobacteria	Frankiales	Nakamurellaceae	Nakamurella	unclassified_Nakamurella	0	36	0	189	0	0	0	0	0	0	0	53	31	0	0	0	0	0	0	0	0	0	0	0	0	0
ASV_1013	Bacteria	Planctomycetota	Planctomycetes	Planctomycetales	unclassified_Planctomycetales	unclassified_Planctomycetales	unclassified_Planctomycetales	0	0	0	0	0	0	0	0	0	0	0	0	265	44	0	0	0	0	0	0	0	0	0	0	0	0
ASV_1014	Bacteria	Chloroflexi	Anaerolineae	Caldilineales	Caldilineaceae	unclassified_Caldilineaceae	unclassified_Caldilineaceae	0	0	0	0	0	0	0	0	0	0	0	0	0	0	0	0	0	0	0	0	107	0	202	0	0	0
ASV_1015	Bacteria	Bacteroidota	Bacteroidia	Chitinophagales	Chitinophagaceae	Segetibacter	unclassified_Segetibacter	0	0	0	213	0	0	0	0	0	0	0	0	0	0	0	0	95	0	0	0	0	0	0	0	0	0
ASV_1016	Bacteria	Verrucomicrobiota	Verrucomicrobiae	Chthoniobacterales	Chthoniobacteraceae	Candidatus Udaeobacter	unclassified_Candidatus Udaeobacter	0	0	0	0	0	0	34	69	0	0	0	0	0	0	0	0	0	0	0	129	0	0	0	76	0	0
ASV_1017	Bacteria	Bacteroidota	Bacteroidia	Chitinophagales	Chitinophagaceae	unclassified_Chitinophagaceae	unclassified_Chitinophagaceae	0	0	0	0	0	0	0	0	0	0	0	0	0	0	0	0	0	0	0	232	0	0	0	76	0	0
ASV_1018	Bacteria	Myxococcota	Polyangia	Polyangiales	BIrii41	unclassified_BIrii41	unclassified_BIrii41	7	0	58	0	0	0	60	69	0	0	0	0	0	35	0	0	0	12	45	0	0	21	0	0	0	0
ASV_1019	Bacteria	Proteobacteria	Alphaproteobacteria	Rhodobacterales	Rhodobacteraceae	Limibaculum	unclassified_Limibaculum	0	0	0	0	14	0	29	53	0	0	0	0	0	0	0	0	0	101	82	0	0	28	0	0	0	0
ASV_1020	Bacteria	Bacteroidota	Bacteroidia	Cytophagales	Microscillaceae	Chryseolinea	unclassified_Chryseolinea	0	26	0	26	0	0	0	0	16	0	43	62	0	7	99	0	27	0	0	0	0	0	0	0	0	0
ASV_1021	Bacteria	Proteobacteria	Alphaproteobacteria	Rhizobiales	unclassified_Rhizobiales	unclassified_Rhizobiales	unclassified_Rhizobiales	0	0	0	0	0	0	0	0	0	0	0	0	0	0	0	0	0	0	0	0	0	0	0	0	14	292
ASV_1022	Bacteria	Gemmatimonadota	Gemmatimonadetes	Gemmatimonadales	Gemmatimonadaceae	Gemmatimonas	unclassified_Gemmatimonas	23	0	36	11	0	15	77	55	0	0	0	0	0	0	40	0	0	36	12	0	0	0	0	0	0	0
ASV_1023	Bacteria	Proteobacteria	Alphaproteobacteria	Sphingomonadales	Sphingomonadaceae	Sphingobium	endophyticum	0	91	0	28	0	0	0	0	25	0	0	0	0	0	0	0	161	0	0	0	0	0	0	0	0	0
ASV_1024	Bacteria	Proteobacteria	Gammaproteobacteria	Burkholderiales	unclassified_Burkholderiales	unclassified_Burkholderiales	unclassified_Burkholderiales	0	0	4	3	44	0	22	42	0	0	0	0	0	0	23	0	0	62	36	6	16	47	0	0	0	0
ASV_1025	Bacteria	Bacteroidota	Bacteroidia	Chitinophagales	Chitinophagaceae	Ferruginibacter	unclassified_Ferruginibacter	0	0	0	0	0	0	0	0	143	17	0	123	22	0	0	0	0	0	0	0	0	0	0	0	0	0
ASV_1026	Bacteria	Bacteroidota	Bacteroidia	Chitinophagales	Chitinophagaceae	Segetibacter	unclassified_Segetibacter	0	0	0	0	0	0	0	0	0	0	0	0	0	0	0	304	0	0	0	0	0	0	0	0	0	0
ASV_1027	Bacteria	RCP2-54	unclassified_RCP2-54	unclassified_RCP2-54	unclassified_RCP2-54	unclassified_RCP2-54	unclassified_RCP2-54	0	0	0	0	0	0	0	0	0	0	0	0	0	0	0	0	0	0	20	0	0	88	0	0	0	196
ASV_1028	Bacteria	Bacteroidota	Bacteroidia	Cytophagales	Microscillaceae	unclassified_Microscillaceae	unclassified_Microscillaceae	13	135	0	65	0	0	9	0	0	0	0	0	0	0	39	0	20	0	22	0	0	0	0	0	0	0
ASV_1029	Bacteria	Verrucomicrobiota	Verrucomicrobiae	Pedosphaerales	Pedosphaeraceae	Ellin517	unclassified_Ellin517	0	0	0	0	0	0	0	0	0	0	0	0	267	29	0	0	0	0	0	0	0	0	0	0	7	0
ASV_1030	Bacteria	Verrucomicrobiota	Chlamydiae	Chlamydiales	unclassified_Chlamydiales	unclassified_Chlamydiales	unclassified_Chlamydiales	5	0	0	4	0	0	0	0	45	17	8	150	40	8	0	0	12	0	0	0	0	0	0	0	0	13
ASV_1031	Bacteria	Actinobacteriota	Acidimicrobiia	unclassified_Acidimicrobiia	unclassified_Acidimicrobiia	unclassified_Acidimicrobiia	unclassified_Acidimicrobiia	0	0	18	0	0	17	46	21	0	0	0	0	0	0	65	0	0	30	0	46	0	0	0	59	0	0
ASV_1032	Bacteria	Actinobacteriota	Actinobacteria	Propionibacteriales	Nocardioidaceae	Nocardioides	unclassified_Nocardioides	0	0	0	66	0	0	0	0	7	0	0	25	13	0	0	0	191	0	0	0	0	0	0	0	0	0
ASV_1033	Bacteria	Bacteroidota	Kapabacteria	Kapabacteriales	unclassified_Kapabacteriales	unclassified_Kapabacteriales	unclassified_Kapabacteriales	10	28	18	32	0	11	0	0	0	18	0	18	9	0	67	0	90	0	0	0	0	0	0	0	0	0
ASV_1034	Bacteria	Gemmatimonadota	Gemmatimonadetes	Gemmatimonadales	Gemmatimonadaceae	unclassified_Gemmatimonadaceae	unclassified_Gemmatimonadaceae	0	0	44	0	5	0	24	95	0	0	0	0	0	0	0	0	0	14	40	32	0	47	0	0	0	0
ASV_1035	Bacteria	Acidobacteriota	Blastocatellia	Pyrinomonadales	Pyrinomonadaceae	RB41	unclassified_RB41	0	0	0	0	26	0	39	195	0	0	0	0	0	0	0	0	0	41	0	0	0	0	0	0	0	0
ASV_1036	Bacteria	Sumerlaeota	Sumerlaeia	Sumerlaeales	Sumerlaeaceae	Sumerlaea	unclassified_Sumerlaea	23	18	0	0	10	0	81	19	0	0	0	6	0	0	14	63	66	0	0	0	0	0	0	0	0	0
ASV_1037	Bacteria	Chloroflexi	Chloroflexia	Chloroflexales	Roseiflexaceae	unclassified_Roseiflexaceae	unclassified_Roseiflexaceae	10	11	16	0	19	22	51	74	0	0	0	0	0	0	63	20	5	9	0	0	0	0	0	0	0	0
ASV_1038	Bacteria	Actinobacteriota	Actinobacteria	Micrococcales	Intrasporangiaceae	unclassified_Intrasporangiaceae	unclassified_Intrasporangiaceae	0	108	0	180	0	0	0	0	12	0	0	0	0	0	0	0	0	0	0	0	0	0	0	0	0	0
ASV_1039	Bacteria	Chloroflexi	Chloroflexia	Chloroflexales	Roseiflexaceae	unclassified_Roseiflexaceae	unclassified_Roseiflexaceae	0	0	79	16	0	0	30	33	0	0	0	0	9	0	41	11	5	0	76	0	0	0	0	0	0	0
ASV_1040	Bacteria	Actinobacteriota	Rubrobacteria	Rubrobacterales	Rubrobacteriaceae	Rubrobacter	unclassified_Rubrobacter	0	0	0	0	0	0	0	0	0	0	0	0	0	0	0	0	0	300	0	0	0	0	0	0	0	0
ASV_1041	Bacteria	Verrucomicrobiota	Verrucomicrobiae	Chthoniobacterales	Chthoniobacteraceae	Candidatus Udaeobacter	unclassified_Candidatus Udaeobacter	0	0	0	0	0	0	0	0	0	0	0	0	0	0	0	0	0	0	0	152	0	0	0	148	0	0
ASV_1042	Bacteria	Proteobacteria	Alphaproteobacteria	Rhodobacterales	Rhodobacteraceae	unclassified_Rhodobacteraceae	unclassified_Rhodobacteraceae	70	60	24	42	15	10	30	0	0	0	0	0	0	0	0	0	31	0	0	0	0	17	0	0	0	0
ASV_1043	Bacteria	Actinobacteriota	Actinobacteria	Frankiales	unclassified_Frankiales	unclassified_Frankiales	unclassified_Frankiales	29	0	0	52	39	0	25	20	0	0	0	0	0	0	19	14	21	52	0	22	0	0	0	6	0	0
ASV_1044	Bacteria	Bacteroidota	Bacteroidia	Flavobacteriales	Flavobacteriaceae	Aequorivita	antarctica	0	0	285	0	0	0	13	0	0	0	0	0	0	0	0	0	0	0	0	0	0	0	0	0	0	0
ASV_1045	Archaea	Crenarchaeota	Nitrososphaeria	Nitrososphaerales	Nitrososphaeraceae	Candidatus Nitrocosmicus	unclassified_Candidatus Nitrocosmicus	0	0	0	0	0	0	0	0	0	0	0	0	0	0	0	0	0	0	0	0	189	0	109	0	0	0
ASV_1046	Bacteria	Bacteroidota	Bacteroidia	Chitinophagales	Chitinophagaceae	Segetibacter	unclassified_Segetibacter	23	14	0	0	80	29	31	22	0	0	0	0	0	0	59	0	0	39	0	0	0	0	0	0	0	0
ASV_1047	Bacteria	unclassified_Bacteria	unclassified_Bacteria	unclassified_Bacteria	unclassified_Bacteria	unclassified_Bacteria	unclassified_Bacteria	0	0	0	7	0	0	0	0	0	0	0	0	0	4	0	0	286	0	0	0	0	0	0	0	0	0
ASV_1048	Bacteria	Verrucomicrobiota	Verrucomicrobiae	Chthoniobacterales	Chthoniobacteraceae	Chthoniobacter	unclassified_Chthoniobacter	0	0	0	0	28	0	0	0	0	0	0	0	0	0	81	6	0	0	0	164	0	0	0	18	0	0
ASV_1049	Bacteria	Verrucomicrobiota	Verrucomicrobiae	Chthoniobacterales	Chthoniobacteraceae	Chthoniobacter	unclassified_Chthoniobacter	15	0	0	0	64	0	28	25	0	0	0	0	0	0	0	0	0	0	41	0	0	34	0	0	14	75
ASV_1050	Bacteria	Actinobacteriota	Thermoleophilia	Gaiellales	unclassified_Gaiellales	unclassified_Gaiellales	unclassified_Gaiellales	0	0	0	0	0	0	0	0	0	0	0	0	21	0	0	0	0	0	0	0	0	0	0	0	28	247
ASV_1051	Bacteria	Acidobacteriota	Blastocatellia	Blastocatellales	Blastocatellaceae	Blastocatella	unclassified_Blastocatella	0	0	0	0	0	0	0	0	0	0	0	0	0	0	86	0	0	209	0	0	0	0	0	0	0	0
ASV_1052	Bacteria	Acidobacteriota	Vicinamibacteria	Vicinamibacterales	Vicinamibacteraceae	unclassified_Vicinamibacteraceae	unclassified_Vicinamibacteraceae	0	0	0	0	0	0	0	0	0	0	0	0	0	0	0	0	0	0	0	0	0	0	0	0	0	295
ASV_1053	Bacteria	Proteobacteria	Alphaproteobacteria	Sphingomonadales	Sphingomonadaceae	Altererythrobacter	unclassified_Altererythrobacter	41	33	123	23	0	0	0	13	0	0	0	0	0	0	0	0	0	0	27	0	0	33	0	0	0	0
ASV_1054	Bacteria	Acidobacteriota	Blastocatellia	Pyrinomonadales	Pyrinomonadaceae	RB41	unclassified_RB41	0	0	0	0	0	0	0	0	0	0	0	0	0	0	0	293	0	0	0	0	0	0	0	0	0	0
ASV_1055	Bacteria	Bacteroidota	Rhodothermia	Balneolales	Balneolaceae	unclassified_Balneolaceae	unclassified_Balneolaceae	0	0	0	0	0	0	0	0	0	0	0	0	0	0	0	0	0	0	0	0	0	0	293	0	0	0
ASV_1056	Bacteria	Bacteroidota	Bacteroidia	Chitinophagales	Chitinophagaceae	Parafilimonas	unclassified_Parafilimonas	27	15	4	42	5	0	18	0	0	0	0	0	0	0	35	19	126	0	0	0	0	0	0	0	0	0
ASV_1057	Bacteria	Proteobacteria	Alphaproteobacteria	Rhizobiales	Labraceae	Labrys	unclassified_Labrys	21	24	20	28	0	0	0	0	17	0	0	24	49	14	0	0	94	0	0	0	0	0	0	0	0	0
ASV_1058	Bacteria	Proteobacteria	Gammaproteobacteria	Burkholderiales	TRA3-20	unclassified_TRA3-20	unclassified_TRA3-20	0	0	22	14	0	0	21	22	0	0	0	0	15	0	44	40	26	0	0	0	0	0	0	0	18	69
ASV_1059	Bacteria	Bacteroidota	Bacteroidia	Flavobacteriales	NS9 marine group	unclassified_NS9 marine group	unclassified_NS9 marine group	0	0	0	0	19	17	23	40	0	0	0	0	0	0	82	0	0	13	97	0	0	0	0	0	0	0
ASV_1060	Bacteria	Acidobacteriota	Blastocatellia	Pyrinomonadales	Pyrinomonadaceae	RB41	unclassified_RB41	0	0	0	0	0	0	16	0	0	0	0	0	0	0	0	47	0	84	0	0	0	144	0	0	0	0
ASV_1061	Bacteria	Actinobacteriota	Acidimicrobiia	Microtrichales	Ilumatobacteraceae	CL500-29 marine group	unclassified_CL500-29 marine group	0	0	0	0	0	0	0	0	72	29	0	42	119	29	0	0	0	0	0	0	0	0	0	0	0	0
ASV_1062	Bacteria	Gemmatimonadota	S0134 terrestrial group	unclassified_S0134 terrestrial group	unclassified_S0134 terrestrial group	unclassified_S0134 terrestrial group	unclassified_S0134 terrestrial group	0	0	0	0	0	0	0	0	0	0	0	0	0	0	0	0	0	0	0	0	61	0	230	0	0	0
ASV_1063	Bacteria	Bacteroidota	Bacteroidia	Cytophagales	Spirosomaceae	Spirosoma	unclassified_Spirosoma	0	0	245	0	15	0	0	0	0	0	0	0	30	0	0	0	0	0	0	0	0	0	0	0	0	0
ASV_1064	Bacteria	Cyanobacteria	Cyanobacteriia	Phormidesmiales	Nodosilineaceae	Nodosilinea PCC-7104	unclassified_Nodosilinea PCC-7104	0	0	0	0	0	0	0	0	0	0	0	0	0	0	176	0	0	0	114	0	0	0	0	0	0	0
ASV_1065	Bacteria	Actinobacteriota	Actinobacteria	Pseudonocardiales	Pseudonocardiaceae	Crossiella	unclassified_Crossiella	0	0	0	0	0	0	0	289	0	0	0	0	0	0	0	0	0	0	0	0	0	0	0	0	0	0
ASV_1066	Bacteria	Actinobacteriota	Thermoleophilia	Gaiellales	Gaiellaceae	Gaiella	unclassified_Gaiella	0	0	17	0	62	18	0	0	0	0	0	0	0	0	191	0	0	0	0	0	0	0	0	0	0	0
ASV_1067	Archaea	Crenarchaeota	Nitrososphaeria	Nitrososphaerales	Nitrososphaeraceae	Candidatus Nitrocosmicus	unclassified_Candidatus Nitrocosmicus	0	0	0	0	0	0	0	0	0	0	0	0	0	0	0	0	0	0	0	0	189	0	99	0	0	0
ASV_1068	Bacteria	Actinobacteriota	Acidimicrobiia	Microtrichales	Iamiaceae	Iamia	unclassified_Iamia	17	0	42	0	25	0	53	84	0	0	0	0	0	0	32	0	0	0	0	0	0	33	0	0	0	0
ASV_1069	Bacteria	Bacteroidota	Bacteroidia	Cytophagales	Hymenobacteraceae	Hymenobacter	unclassified_Hymenobacter	0	0	0	0	0	0	0	0	0	0	0	0	0	0	0	0	0	0	0	0	0	0	0	286	0	0
ASV_1070	Bacteria	Proteobacteria	Alphaproteobacteria	Rhodobacterales	Rhodobacteraceae	unclassified_Rhodobacteraceae	unclassified_Rhodobacteraceae	0	0	49	0	0	17	37	18	0	0	0	0	0	0	0	0	0	10	92	0	0	62	0	0	0	0
ASV_1071	Bacteria	Verrucomicrobiota	Verrucomicrobiae	Chthoniobacterales	Chthoniobacteraceae	Chthoniobacter	unclassified_Chthoniobacter	0	0	36	0	0	0	46	70	0	0	0	0	0	0	0	0	0	12	84	0	0	37	0	0	0	0
ASV_1072	Bacteria	Actinobacteriota	Thermoleophilia	Gaiellales	Gaiellaceae	Gaiella	unclassified_Gaiella	0	0	0	0	0	0	0	0	0	0	0	0	0	0	11	0	0	0	139	0	0	135	0	0	0	0
ASV_1073	Bacteria	Actinobacteriota	Thermoleophilia	Solirubrobacterales	67-14	unclassified_67-14	unclassified_67-14	0	0	0	0	0	0	0	0	0	0	0	0	0	0	0	0	0	0	0	285	0	0	0	0	0	0
ASV_1074	Bacteria	Chloroflexi	Ktedonobacteria	C0119	unclassified_C0119	unclassified_C0119	unclassified_C0119	10	0	5	0	31	0	12	0	0	0	0	0	0	0	0	80	0	0	0	0	0	30	0	0	14	102
ASV_1075	Bacteria	Myxococcota	Polyangia	Polyangiales	Polyangiaceae	Pajaroellobacter	unclassified_Pajaroellobacter	0	17	0	0	0	0	27	8	0	0	82	29	0	0	0	0	59	0	0	42	0	0	0	20	0	0
ASV_1076	Bacteria	Proteobacteria	Alphaproteobacteria	Sphingomonadales	Sphingomonadaceae	Erythrobacter	unclassified_Erythrobacter	18	0	0	27	0	0	0	0	0	0	0	38	0	0	0	0	0	0	110	0	0	90	0	0	0	0
ASV_1077	Bacteria	Bacteroidota	Bacteroidia	Cytophagales	Microscillaceae	Hassallia	unclassified_Hassallia	17	68	66	0	5	0	0	39	12	0	0	0	0	0	0	12	39	0	0	0	0	25	0	0	0	0
ASV_1078	Bacteria	Planctomycetota	Planctomycetes	Planctomycetales	unclassified_Planctomycetales	unclassified_Planctomycetales	unclassified_Planctomycetales	0	0	13	0	11	0	0	26	0	0	0	0	0	0	44	20	70	16	28	0	0	55	0	0	0	0
ASV_1079	Bacteria	Proteobacteria	Gammaproteobacteria	Burkholderiales	SC-I-84	unclassified_SC-I-84	unclassified_SC-I-84	0	0	13	0	0	0	0	0	0	0	0	0	0	0	0	69	0	0	25	0	0	0	0	0	8	168
ASV_1080	Bacteria	Planctomycetota	Planctomycetes	Pirellulales	Pirellulaceae	Blastopirellula	unclassified_Blastopirellula	0	0	5	0	6	0	15	60	0	0	0	0	0	0	0	0	0	28	41	68	34	26	0	0	0	0
ASV_1081	Bacteria	Actinobacteriota	Actinobacteria	Micrococcales	Microbacteriaceae	Parafrigoribacterium	unclassified_Parafrigoribacterium	0	0	0	0	0	0	0	0	199	0	84	0	0	0	0	0	0	0	0	0	0	0	0	0	0	0
ASV_1082	Bacteria	Gemmatimonadota	Gemmatimonadetes	Gemmatimonadales	Gemmatimonadaceae	unclassified_Gemmatimonadaceae	unclassified_Gemmatimonadaceae	0	0	0	0	0	0	0	0	0	0	0	0	0	0	0	0	0	48	28	0	0	207	0	0	0	0
ASV_1083	Bacteria	Chloroflexi	Chloroflexia	Thermomicrobiales	JG30-KF-CM45	unclassified_JG30-KF-CM45	unclassified_JG30-KF-CM45	0	0	0	25	0	0	0	0	0	0	0	0	0	0	0	0	0	73	66	0	0	118	0	0	0	0
ASV_1084	Bacteria	Verrucomicrobiota	Verrucomicrobiae	Pedosphaerales	Pedosphaeraceae	unclassified_Pedosphaeraceae	unclassified_Pedosphaeraceae	0	0	0	0	10	0	0	0	0	0	0	0	0	0	0	0	0	0	40	0	0	40	0	0	15	177
ASV_1085	Bacteria	Proteobacteria	Gammaproteobacteria	Burkholderiales	Nitrosomonadaceae	MND1	unclassified_MND1	0	0	0	0	0	0	0	0	0	0	0	44	92	33	0	0	7	0	0	0	0	10	0	0	8	88
ASV_1086	Bacteria	Bacteroidota	Bacteroidia	Flavobacteriales	Crocinitomicaceae	Fluviicola	unclassified_Fluviicola	27	0	0	0	114	13	21	85	0	0	0	0	0	0	0	0	21	0	0	0	0	0	0	0	0	0
ASV_1087	Bacteria	Acidobacteriota	Blastocatellia	Blastocatellales	Blastocatellaceae	Blastocatella	unclassified_Blastocatella	0	0	0	0	97	63	0	0	0	0	0	0	0	0	121	0	0	0	0	0	0	0	0	0	0	0
ASV_1088	Bacteria	Actinobacteriota	Actinobacteria	Pseudonocardiales	Pseudonocardiaceae	Pseudonocardia	unclassified_Pseudonocardia	0	0	0	0	0	0	0	0	0	0	0	0	0	0	0	0	0	93	188	0	0	0	0	0	0	0
ASV_1089	Bacteria	Gemmatimonadota	Gemmatimonadetes	Gemmatimonadales	Gemmatimonadaceae	Gemmatimonas	unclassified_Gemmatimonas	0	0	0	0	45	0	0	39	0	0	0	0	0	0	0	0	0	75	85	0	0	36	0	0	0	0
ASV_1090	Bacteria	Verrucomicrobiota	Verrucomicrobiae	Verrucomicrobiales	Verrucomicrobiaceae	unclassified_Verrucomicrobiaceae	unclassified_Verrucomicrobiaceae	0	0	0	0	0	0	31	47	0	0	0	0	26	0	0	0	0	48	53	0	0	75	0	0	0	0
ASV_1091	Bacteria	Chloroflexi	Anaerolineae	RBG-13-54-9	unclassified_RBG-13-54-9	unclassified_RBG-13-54-9	unclassified_RBG-13-54-9	0	0	0	0	0	0	0	0	0	0	0	0	0	0	0	0	0	21	0	0	0	259	0	0	0	0
ASV_1092	Bacteria	Bacteroidota	Bacteroidia	Chitinophagales	Chitinophagaceae	UTBCD1	unclassified_UTBCD1	0	0	0	0	0	0	0	32	0	0	0	0	0	0	0	0	0	25	119	68	26	0	0	0	0	9
ASV_1093	Bacteria	Acidobacteriota	Subgroup 22	unclassified_Subgroup 22	unclassified_Subgroup 22	unclassified_Subgroup 22	unclassified_Subgroup 22	0	0	0	0	0	0	0	11	0	0	0	0	219	11	0	0	0	0	0	0	0	38	0	0	0	0
ASV_1094	Bacteria	Cyanobacteria	Cyanobacteriia	Cyanobacteriales	Chroococcidiopsaceae	Crinalium SAG 22.89	unclassified_Crinalium SAG 22.89	0	0	0	14	0	0	230	29	0	0	0	0	0	0	0	0	0	0	0	0	0	5	0	0	0	0
ASV_1095	Bacteria	Verrucomicrobiota	Verrucomicrobiae	Chthoniobacterales	Chthoniobacteraceae	Candidatus Udaeobacter	unclassified_Candidatus Udaeobacter	0	0	0	0	51	0	155	72	0	0	0	0	0	0	0	0	0	0	0	0	0	0	0	0	0	0
ASV_1096	Bacteria	Acidobacteriota	Acidobacteriae	Paludibaculum	unclassified_Paludibaculum	unclassified_Paludibaculum	unclassified_Paludibaculum	0	0	0	0	0	0	0	0	0	0	22	13	225	18	0	0	0	0	0	0	0	0	0	0	0	0
ASV_1097	Bacteria	Actinobacteriota	Thermoleophilia	Solirubrobacterales	Solirubrobacteraceae	unclassified_Solirubrobacteraceae	unclassified_Solirubrobacteraceae	0	0	0	0	0	0	0	0	0	0	0	0	0	0	0	104	0	47	27	0	0	100	0	0	0	0
ASV_1098	Bacteria	Actinobacteriota	Acidimicrobiia	unclassified_Acidimicrobiia	unclassified_Acidimicrobiia	unclassified_Acidimicrobiia	unclassified_Acidimicrobiia	26	0	0	0	78	0	0	0	0	0	0	0	0	0	24	0	0	24	95	30	0	0	0	0	0	0
ASV_1099	Bacteria	Chloroflexi	Chloroflexia	Thermomicrobiales	JG30-KF-CM45	unclassified_JG30-KF-CM45	unclassified_JG30-KF-CM45	0	0	0	0	94	26	23	30	0	0	0	0	0	0	38	23	0	0	0	0	0	35	0	0	0	8
ASV_1100	Bacteria	Actinobacteriota	Thermoleophilia	Solirubrobacterales	Solirubrobacteraceae	Solirubrobacter	unclassified_Solirubrobacter	0	0	0	0	0	0	26	90	0	0	0	0	0	0	0	36	0	117	0	0	0	0	0	0	8	0
ASV_1101	Bacteria	Gemmatimonadota	AKAU4049	unclassified_AKAU4049	unclassified_AKAU4049	unclassified_AKAU4049	unclassified_AKAU4049	0	0	0	0	0	0	0	0	0	0	0	0	0	0	0	226	0	50	0	0	0	0	0	0	0	0
ASV_1102	Bacteria	Actinobacteriota	MB-A2-108	unclassified_MB-A2-108	unclassified_MB-A2-108	unclassified_MB-A2-108	unclassified_MB-A2-108	9	0	0	9	59	0	36	63	21	3	0	0	0	0	0	0	19	32	15	0	0	9	0	0	0	0
ASV_1103	Bacteria	Bacteroidota	Bacteroidia	Cytophagales	Spirosomaceae	Dyadobacter	unclassified_Dyadobacter	0	23	153	0	52	35	0	0	0	0	0	0	10	0	0	0	0	0	0	0	0	0	0	0	0	2
ASV_1104	Bacteria	Bacteroidota	Bacteroidia	Sphingobacteriales	AKYH767	unclassified_AKYH767	unclassified_AKYH767	0	0	0	0	0	0	24	167	0	0	0	0	0	0	0	67	0	5	0	0	0	12	0	0	0	0
ASV_1105	Bacteria	Cyanobacteria	Vampirivibrionia	Obscuribacterales	Obscuribacteraceae	unclassified_Obscuribacteraceae	unclassified_Obscuribacteraceae	0	0	0	0	0	0	0	0	0	0	0	87	120	52	4	0	0	0	0	0	0	0	0	0	0	12
ASV_1106	Bacteria	Bacteroidota	Bacteroidia	Chitinophagales	Chitinophagaceae	Terrimonas	unclassified_Terrimonas	19	0	0	0	0	0	0	0	0	0	0	0	255	0	0	0	0	0	0	0	0	0	0	0	0	0
ASV_1107	Bacteria	Acidobacteriota	Blastocatellia	Blastocatellales	Blastocatellaceae	Aridibacter	unclassified_Aridibacter	0	70	0	0	0	0	0	0	0	49	0	70	0	22	0	0	63	0	0	0	0	0	0	0	0	0
ASV_1108	Bacteria	Verrucomicrobiota	Verrucomicrobiae	Opitutales	Opitutaceae	Opitutus	unclassified_Opitutus	0	0	0	0	0	0	0	0	8	0	37	32	87	22	18	0	70	0	0	0	0	0	0	0	0	0
ASV_1109	Bacteria	Actinobacteriota	Actinobacteria	Corynebacteriales	Mycobacteriaceae	Mycobacterium	unclassified_Mycobacterium	0	0	0	0	0	0	0	0	0	0	0	0	274	0	0	0	0	0	0	0	0	0	0	0	0	0
ASV_1110	Bacteria	Elusimicrobiota	Elusimicrobia	Lineage IV	unclassified_Lineage IV	unclassified_Lineage IV	unclassified_Lineage IV	31	0	0	0	0	0	0	0	12	0	9	46	46	43	13	6	36	0	0	0	0	0	0	0	0	31
ASV_1111	Bacteria	Proteobacteria	Alphaproteobacteria	Reyranellales	Reyranellaceae	Reyranella	unclassified_Reyranella	0	0	12	0	69	0	22	0	0	0	0	0	0	0	64	31	0	0	38	5	0	32	0	0	0	0
ASV_1112	Bacteria	Chloroflexi	Chloroflexia	Thermomicrobiales	JG30-KF-CM45	unclassified_JG30-KF-CM45	unclassified_JG30-KF-CM45	0	0	0	0	16	62	28	36	0	0	0	0	0	0	0	0	0	131	0	0	0	0	0	0	0	0
ASV_1113	Bacteria	Actinobacteriota	Thermoleophilia	Solirubrobacterales	67-14	unclassified_67-14	unclassified_67-14	0	0	0	0	0	0	0	0	0	0	0	0	0	0	0	37	0	0	47	0	0	189	0	0	0	0
ASV_1114	Bacteria	Verrucomicrobiota	Verrucomicrobiae	Verrucomicrobiales	Rubritaleaceae	Luteolibacter	algae	0	0	0	0	0	0	0	0	0	0	0	0	0	0	0	0	0	0	0	19	108	0	146	0	0	0
ASV_1115	Bacteria	Actinobacteriota	Actinobacteria	Euzebyales	Euzebyaceae	unclassified_Euzebyaceae	unclassified_Euzebyaceae	0	0	0	0	0	0	0	0	0	0	0	0	0	0	0	0	0	0	0	0	273	0	0	0	0	0
ASV_1116	Archaea	Crenarchaeota	Nitrososphaeria	Nitrososphaerales	Nitrososphaeraceae	unclassified_Nitrososphaeraceae	unclassified_Nitrososphaeraceae	0	0	0	0	0	0	0	0	0	0	0	0	0	0	0	0	0	0	0	0	0	273	0	0	0	0
ASV_1117	Bacteria	Bacteroidota	Bacteroidia	Flavobacteriales	Flavobacteriaceae	Flavobacterium	unclassified_Flavobacterium	0	0	0	74	0	0	0	0	8	0	45	0	25	0	14	0	106	0	0	0	0	0	0	0	0	0
ASV_1118	Bacteria	Gemmatimonadota	Longimicrobia	Longimicrobiales	Longimicrobiaceae	unclassified_Longimicrobiaceae	unclassified_Longimicrobiaceae	0	0	0	0	0	0	0	0	0	0	0	0	0	0	0	0	0	0	0	0	178	0	94	0	0	0
ASV_1119	Bacteria	Proteobacteria	Alphaproteobacteria	Rhizobiales	Rhizobiaceae	Mesorhizobium	ciceri	0	51	33	0	0	0	0	0	114	0	0	0	0	0	0	38	35	0	0	0	0	0	0	0	0	0
ASV_1120	Bacteria	Acidobacteriota	Blastocatellia	Blastocatellales	Blastocatellaceae	JGI 0001001-H03	unclassified_JGI 0001001-H03	0	0	0	0	0	0	0	0	69	35	28	39	68	32	0	0	0	0	0	0	0	0	0	0	0	0
ASV_1121	Bacteria	Verrucomicrobiota	Verrucomicrobiae	Chthoniobacterales	Chthoniobacteraceae	Chthoniobacter	unclassified_Chthoniobacter	0	0	0	0	0	0	0	0	0	0	0	0	0	0	0	0	0	0	0	0	0	34	0	0	26	211
ASV_1122	Bacteria	Bacteroidota	Bacteroidia	Cytophagales	Hymenobacteraceae	Hymenobacter	unclassified_Hymenobacter	0	0	0	133	18	0	0	0	0	0	0	0	46	0	0	73	0	0	0	0	0	0	0	0	0	0
ASV_1123	Bacteria	Acidobacteriota	Blastocatellia	Blastocatellales	Blastocatellaceae	Stenotrophobacter	unclassified_Stenotrophobacter	0	0	0	0	0	0	15	105	0	0	0	0	0	0	0	0	0	150	0	0	0	0	0	0	0	0
ASV_1124	Bacteria	Proteobacteria	Alphaproteobacteria	Sphingomonadales	Sphingomonadaceae	Sphingomonas	unclassified_Sphingomonas	0	0	0	0	0	0	0	0	0	0	270	0	0	0	0	0	0	0	0	0	0	0	0	0	0	0
ASV_1125	Bacteria	Cyanobacteria	Cyanobacteriia	Phormidesmiales	Phormidesmiaceae	Phormidesmis ANT.LACV5.1	unclassified_Phormidesmis ANT.LACV5.1	0	0	0	0	0	0	0	0	0	0	0	0	0	0	0	0	0	0	39	0	0	231	0	0	0	0
ASV_1126	Bacteria	Myxococcota	Polyangia	Polyangiales	Polyangiaceae	Pajaroellobacter	unclassified_Pajaroellobacter	0	43	0	28	0	0	0	0	86	9	0	0	16	17	0	21	43	0	0	0	6	0	0	0	0	0
ASV_1127	Bacteria	Nitrospirota	Nitrospiria	Nitrospirales	Nitrospiraceae	Nitrospira	unclassified_Nitrospira	0	0	0	0	25	7	10	26	0	0	0	0	0	0	21	26	0	81	0	0	0	73	0	0	0	0
ASV_1128	Bacteria	Proteobacteria	Gammaproteobacteria	Burkholderiales	Comamonadaceae	unclassified_Comamonadaceae	unclassified_Comamonadaceae	0	0	0	0	0	0	0	0	57	28	0	175	0	0	0	0	9	0	0	0	0	0	0	0	0	0
ASV_1129	Bacteria	Actinobacteriota	Acidimicrobiia	Microtrichales	Ilumatobacteraceae	unclassified_Ilumatobacteraceae	unclassified_Ilumatobacteraceae	94	90	0	49	0	0	0	0	0	0	0	29	6	0	0	0	0	0	0	0	0	0	0	0	0	0
ASV_1130	Bacteria	Acidobacteriota	Vicinamibacteria	Vicinamibacterales	Vicinamibacteraceae	Luteitalea	unclassified_Luteitalea	0	0	0	0	0	0	0	0	0	0	0	0	0	0	0	0	0	0	0	119	20	0	72	57	0	0
ASV_1131	Bacteria	Actinobacteriota	Thermoleophilia	Solirubrobacterales	67-14	unclassified_67-14	unclassified_67-14	0	7	0	0	50	10	9	41	16	0	0	0	0	0	61	9	24	0	0	28	0	0	0	12	0	0
ASV_1132	Bacteria	Actinobacteriota	Acidimicrobiia	Microtrichales	Ilumatobacteraceae	Ilumatobacter	nonamiensis	0	0	16	0	0	0	26	17	0	0	0	0	0	0	17	0	0	0	57	0	134	0	0	0	0	0
ASV_1133	Bacteria	Actinobacteriota	Acidimicrobiia	Microtrichales	unclassified_Microtrichales	unclassified_Microtrichales	unclassified_Microtrichales	0	0	0	0	0	0	0	26	0	0	0	0	0	0	0	0	0	13	9	147	0	0	0	72	0	0
ASV_1134	Bacteria	Proteobacteria	Alphaproteobacteria	Acetobacterales	Acetobacteraceae	Roseococcus	unclassified_Roseococcus	0	0	0	0	0	0	0	0	204	24	0	39	0	0	0	0	0	0	0	0	0	0	0	0	0	0
ASV_1135	Bacteria	Bacteroidota	Bacteroidia	Cytophagales	Cyclobacteriaceae	Echinicola	unclassified_Echinicola	0	0	0	0	0	0	0	0	0	0	0	0	0	0	0	0	0	0	4	19	101	0	143	0	0	0
ASV_1136	Bacteria	Actinobacteriota	Actinobacteria	Micrococcales	Intrasporangiaceae	Knoellia	unclassified_Knoellia	0	44	0	108	0	0	0	0	0	0	0	33	0	0	0	0	81	0	0	0	0	0	0	0	0	0
ASV_1137	Bacteria	Bacteroidota	Bacteroidia	Chitinophagales	Chitinophagaceae	Ferruginibacter	unclassified_Ferruginibacter	0	0	25	0	63	18	32	66	0	0	0	0	0	0	0	0	0	24	0	0	0	38	0	0	0	0
ASV_1138	Bacteria	Acidobacteriota	Blastocatellia	Blastocatellales	Blastocatellaceae	Stenotrophobacter	unclassified_Stenotrophobacter	0	0	0	0	10	0	26	141	0	0	0	0	0	0	0	0	0	89	0	0	0	0	0	0	0	0
ASV_1139	Bacteria	Bacteroidota	Bacteroidia	Chitinophagales	Chitinophagaceae	Segetibacter	unclassified_Segetibacter	0	0	0	0	0	0	0	0	0	0	0	0	0	0	0	0	0	0	0	107	22	0	11	126	0	0
ASV_1140	Bacteria	Proteobacteria	Alphaproteobacteria	Rhizobiales	Rhizobiaceae	Aureimonas	unclassified_Aureimonas	24	19	55	57	61	19	0	0	0	0	0	8	12	0	0	0	10	0	0	0	0	0	0	0	0	0
ASV_1141	Bacteria	Chloroflexi	Ktedonobacteria	C0119	unclassified_C0119	unclassified_C0119	unclassified_C0119	14	0	19	10	35	11	26	19	0	0	0	0	0	0	50	81	0	0	0	0	0	0	0	0	0	0
ASV_1142	Bacteria	Bacteroidota	Bacteroidia	Sphingobacteriales	env.OPS 17	unclassified_env.OPS 17	unclassified_env.OPS 17	0	0	0	0	0	0	0	0	0	0	224	41	0	0	0	0	0	0	0	0	0	0	0	0	0	0
ASV_1143	Bacteria	Armatimonadota	Fimbriimonadia	Fimbriimonadales	Fimbriimonadaceae	unclassified_Fimbriimonadaceae	unclassified_Fimbriimonadaceae	0	0	0	0	0	0	0	0	0	0	0	67	85	113	0	0	0	0	0	0	0	0	0	0	0	0
ASV_1144	Bacteria	Verrucomicrobiota	Verrucomicrobiae	Chthoniobacterales	Chthoniobacteraceae	Candidatus Udaeobacter	unclassified_Candidatus Udaeobacter	0	0	0	0	0	0	0	0	0	0	0	0	0	0	0	108	0	66	0	0	0	72	0	0	19	0
ASV_1145	Bacteria	Bacteroidota	Rhodothermia	Balneolales	Balneolaceae	unclassified_Balneolaceae	unclassified_Balneolaceae	0	0	0	0	0	0	0	0	0	0	0	0	0	0	0	0	0	0	0	0	0	0	265	0	0	0
ASV_1146	Bacteria	Planctomycetota	Planctomycetes	Gemmatales	Gemmataceae	Fimbriiglobus	unclassified_Fimbriiglobus	7	96	0	40	0	0	0	0	0	0	0	0	0	0	0	0	121	0	0	0	0	0	0	0	0	0
ASV_1147	Bacteria	Acidobacteriota	Acidobacteriae	Bryobacterales	Bryobacteraceae	Bryobacter	unclassified_Bryobacter	0	23	0	17	0	0	0	0	121	11	0	17	0	0	0	0	75	0	0	0	0	0	0	0	0	0
ASV_1148	Bacteria	Proteobacteria	Alphaproteobacteria	Caulobacterales	Caulobacteraceae	Phenylobacterium	unclassified_Phenylobacterium	0	0	0	0	0	0	0	0	0	0	244	20	0	0	0	0	0	0	0	0	0	0	0	0	0	0
ASV_1149	Bacteria	Proteobacteria	Alphaproteobacteria	Sphingomonadales	Sphingomonadaceae	Sphingomonas	unclassified_Sphingomonas	0	84	0	43	0	0	0	0	0	0	0	0	0	0	0	0	136	0	0	0	0	0	0	0	0	0
ASV_1150	Bacteria	Chloroflexi	Anaerolineae	SBR1031	A4b	unclassified_A4b	unclassified_A4b	0	22	0	0	0	0	0	0	211	0	0	30	0	0	0	0	0	0	0	0	0	0	0	0	0	0
ASV_1151	Bacteria	Myxococcota	Polyangia	Haliangiales	Haliangiaceae	Haliangium	unclassified_Haliangium	0	0	27	0	14	0	42	36	0	0	0	0	0	0	19	0	0	29	16	14	53	13	0	0	0	0
ASV_1152	Bacteria	Actinobacteriota	Actinobacteria	Euzebyales	Euzebyaceae	unclassified_Euzebyaceae	unclassified_Euzebyaceae	0	0	0	0	0	0	0	0	0	0	0	0	0	0	0	0	0	0	0	0	263	0	0	0	0	0
ASV_1153	Bacteria	Verrucomicrobiota	Verrucomicrobiae	Chthoniobacterales	Terrimicrobiaceae	Terrimicrobium	unclassified_Terrimicrobium	0	51	0	31	0	0	0	0	24	10	0	35	0	0	0	0	111	0	0	0	0	0	0	0	0	0
ASV_1154	Bacteria	Myxococcota	Polyangia	Haliangiales	Haliangiaceae	Haliangium	unclassified_Haliangium	0	42	0	24	0	0	0	0	0	0	0	27	0	0	0	0	169	0	0	0	0	0	0	0	0	0
ASV_1155	Bacteria	Planctomycetota	Phycisphaerae	Tepidisphaerales	WD2101 soil group	unclassified_WD2101 soil group	unclassified_WD2101 soil group	0	0	0	0	0	0	0	0	175	0	0	15	0	0	16	0	38	0	0	0	0	0	0	0	0	18
ASV_1156	Bacteria	Actinobacteriota	Actinobacteria	Micrococcales	Microbacteriaceae	unclassified_Microbacteriaceae	unclassified_Microbacteriaceae	60	0	0	0	0	0	0	0	189	0	0	0	0	0	0	0	0	12	0	0	0	0	0	0	0	0
ASV_1157	Bacteria	Cyanobacteria	Cyanobacteriia	Leptolyngbyales	Leptolyngbyaceae	unclassified_Leptolyngbyaceae	unclassified_Leptolyngbyaceae	0	0	82	51	0	0	22	0	0	0	0	0	8	0	98	0	0	0	0	0	0	0	0	0	0	0
ASV_1158	Bacteria	Actinobacteriota	Actinobacteria	Euzebyales	Euzebyaceae	unclassified_Euzebyaceae	unclassified_Euzebyaceae	0	0	0	0	0	0	0	0	0	0	0	0	0	0	0	0	0	0	0	0	261	0	0	0	0	0
ASV_1159	Bacteria	Chloroflexi	Chloroflexia	Chloroflexales	Herpetosiphonaceae	Herpetosiphon	unclassified_Herpetosiphon	132	9	23	23	6	5	47	6	0	0	0	5	0	0	0	4	0	0	0	0	0	0	0	0	0	0
ASV_1160	Bacteria	Chloroflexi	Chloroflexia	Chloroflexales	Roseiflexaceae	unclassified_Roseiflexaceae	unclassified_Roseiflexaceae	23	14	0	0	0	0	0	0	0	0	0	31	0	0	0	131	61	0	0	0	0	0	0	0	0	0
ASV_1161	Bacteria	Bacteroidota	Bacteroidia	Sphingobacteriales	env.OPS 17	unclassified_env.OPS 17	unclassified_env.OPS 17	0	0	0	0	14	0	31	26	0	0	0	0	0	0	129	33	0	27	0	0	0	0	0	0	0	0
ASV_1162	Bacteria	Proteobacteria	Alphaproteobacteria	Paracaedibacterales	Paracaedibacteraceae	Candidatus Paracaedibacter	unclassified_Candidatus Paracaedibacter	0	0	0	0	0	0	0	0	19	0	0	19	70	12	9	124	0	0	0	0	0	0	0	0	0	7
ASV_1163	Bacteria	Verrucomicrobiota	Chlamydiae	Chlamydiales	Parachlamydiaceae	unclassified_Parachlamydiaceae	unclassified_Parachlamydiaceae	0	0	0	0	0	0	0	0	0	0	0	19	138	25	12	48	0	0	0	0	0	0	0	0	3	15
ASV_1164	Bacteria	Planctomycetota	Planctomycetes	Gemmatales	Gemmataceae	Gemmata	unclassified_Gemmata	13	17	0	18	14	0	0	0	0	0	0	0	0	0	0	0	197	0	0	0	0	0	0	0	0	0
ASV_1165	Bacteria	Proteobacteria	Alphaproteobacteria	Reyranellales	Reyranellaceae	unclassified_Reyranellaceae	unclassified_Reyranellaceae	0	0	0	0	0	0	0	0	0	0	10	241	8	0	0	0	0	0	0	0	0	0	0	0	0	0
ASV_1166	Bacteria	Bdellovibrionota	Oligoflexia	0319-6G20	unclassified_0319-6G20	unclassified_0319-6G20	unclassified_0319-6G20	0	0	0	0	0	0	0	0	258	0	0	0	0	0	0	0	0	0	0	0	0	0	0	0	0	0
ASV_1167	Bacteria	Proteobacteria	Alphaproteobacteria	Sphingomonadales	Sphingomonadaceae	Novosphingobium	unclassified_Novosphingobium	0	0	0	0	0	0	0	0	0	0	0	0	258	0	0	0	0	0	0	0	0	0	0	0	0	0
ASV_1168	Bacteria	Chloroflexi	Chloroflexia	Thermomicrobiales	JG30-KF-CM45	unclassified_JG30-KF-CM45	unclassified_JG30-KF-CM45	0	0	0	0	0	0	0	0	0	0	0	0	0	0	0	0	0	0	0	48	44	0	111	55	0	0
ASV_1169	Bacteria	Acidobacteriota	Blastocatellia	Blastocatellales	Blastocatellaceae	Blastocatella	unclassified_Blastocatella	0	0	13	0	14	11	0	12	0	0	0	0	0	0	145	0	0	0	41	0	0	21	0	0	0	0
ASV_1170	Bacteria	Bacteroidota	Bacteroidia	Flavobacteriales	Flavobacteriaceae	Flavobacterium	unclassified_Flavobacterium	0	0	0	229	0	0	0	0	0	0	0	9	19	0	0	0	0	0	0	0	0	0	0	0	0	0
ASV_1171	Bacteria	Actinobacteriota	Thermoleophilia	Solirubrobacterales	67-14	unclassified_67-14	unclassified_67-14	0	0	0	0	0	0	0	0	0	0	0	0	0	0	26	76	0	14	0	66	0	0	0	65	0	10
ASV_1172	Bacteria	Bacteroidota	Bacteroidia	Sphingobacteriales	Sphingobacteriaceae	Pedobacter	unclassified_Pedobacter	125	48	0	0	38	0	0	0	0	0	0	0	0	0	0	0	45	0	0	0	0	0	0	0	0	0
ASV_1173	Bacteria	Chloroflexi	Ktedonobacteria	C0119	unclassified_C0119	unclassified_C0119	unclassified_C0119	32	0	22	0	0	0	0	0	0	0	0	0	0	0	0	0	202	0	0	0	0	0	0	0	0	0
ASV_1174	Bacteria	Planctomycetota	OM190	unclassified_OM190	unclassified_OM190	unclassified_OM190	unclassified_OM190	7	0	0	0	0	0	0	5	0	0	0	189	17	11	10	0	4	0	0	0	0	13	0	0	0	0
ASV_1175	Bacteria	Bacteroidota	Bacteroidia	Sphingobacteriales	NS11-12 marine group	unclassified_NS11-12 marine group	unclassified_NS11-12 marine group	5	0	0	0	7	0	22	0	0	0	43	12	119	19	7	22	0	0	0	0	0	0	0	0	0	0
ASV_1176	Bacteria	Verrucomicrobiota	Verrucomicrobiae	Pedosphaerales	Pedosphaeraceae	unclassified_Pedosphaeraceae	unclassified_Pedosphaeraceae	0	0	45	0	0	0	20	71	0	0	0	0	0	0	0	0	0	27	0	93	0	0	0	0	0	0
ASV_1177	Bacteria	Proteobacteria	Alphaproteobacteria	Sphingomonadales	Sphingomonadaceae	Porphyrobacter	unclassified_Porphyrobacter	0	0	32	34	0	0	14	0	0	0	0	21	0	0	11	0	0	0	121	0	0	22	0	0	0	0
ASV_1178	Bacteria	Proteobacteria	Alphaproteobacteria	Sphingomonadales	Sphingomonadaceae	Sphingomonas	sediminicola	0	0	122	0	0	0	0	132	0	0	0	0	0	0	0	0	0	0	0	0	0	0	0	0	0	0
ASV_1179	Bacteria	Proteobacteria	Gammaproteobacteria	Burkholderiales	Comamonadaceae	Aquabacterium	unclassified_Aquabacterium	0	0	83	0	0	0	0	0	0	0	0	0	0	0	154	0	0	0	17	0	0	0	0	0	0	0
ASV_1180	Bacteria	Actinobacteriota	Actinobacteria	Micrococcales	Intrasporangiaceae	unclassified_Intrasporangiaceae	unclassified_Intrasporangiaceae	0	0	0	0	0	0	0	0	0	0	0	0	0	0	0	0	0	0	0	50	0	0	12	192	0	0
ASV_1181	Bacteria	Proteobacteria	Alphaproteobacteria	Sphingomonadales	Sphingomonadaceae	Sphingomonas	jaspsi	0	0	0	0	0	0	0	0	0	0	0	0	0	0	0	0	0	0	0	0	0	0	0	253	0	0
ASV_1182	Bacteria	Bacteroidota	Bacteroidia	Flavobacteriales	Flavobacteriaceae	Flavobacterium	gelidilacus	31	8	32	26	7	9	0	21	0	0	0	0	0	0	25	0	8	15	70	0	0	0	0	0	0	0
ASV_1183	Bacteria	Chloroflexi	TK10	unclassified_TK10	unclassified_TK10	unclassified_TK10	unclassified_TK10	25	46	0	0	0	0	0	0	50	0	0	18	51	0	0	0	62	0	0	0	0	0	0	0	0	0
ASV_1184	Bacteria	Acidobacteriota	Blastocatellia	Blastocatellales	Blastocatellaceae	Blastocatella	unclassified_Blastocatella	0	0	0	137	20	0	16	0	0	0	0	0	79	0	0	0	0	0	0	0	0	0	0	0	0	0
ASV_1185	Bacteria	Proteobacteria	Gammaproteobacteria	Xanthomonadales	Xanthomonadaceae	Lysobacter	concretionis	0	0	0	0	0	0	0	0	0	0	0	0	0	0	0	0	0	45	55	0	127	0	25	0	0	0
ASV_1186	Bacteria	Proteobacteria	Gammaproteobacteria	Burkholderiales	Oxalobacteraceae	Massilia	unclassified_Massilia	17	0	0	196	0	0	0	0	0	0	0	0	0	0	0	0	38	0	0	0	0	0	0	0	0	0
ASV_1187	Bacteria	Acidobacteriota	Blastocatellia	Pyrinomonadales	Pyrinomonadaceae	RB41	unclassified_RB41	0	0	0	0	19	0	32	153	0	0	0	0	0	0	0	0	0	47	0	0	0	0	0	0	0	0
ASV_1188	Bacteria	Fibrobacterota	Fibrobacteria	Fibrobacterales	Fibrobacteraceae	unclassified_Fibrobacteraceae	unclassified_Fibrobacteraceae	0	0	0	0	0	0	0	0	0	0	0	0	0	0	0	0	0	0	0	0	97	0	154	0	0	0
ASV_1189	Bacteria	Planctomycetota	Planctomycetes	Gemmatales	Gemmataceae	unclassified_Gemmataceae	unclassified_Gemmataceae	0	0	0	0	0	0	0	0	0	0	0	0	0	0	0	0	0	0	0	0	0	0	0	0	69	182
ASV_1190	Bacteria	Patescibacteria	Parcubacteria	Candidatus Zambryskibacteria	unclassified_Candidatus Zambryskibacteria	unclassified_Candidatus Zambryskibacteria	unclassified_Candidatus Zambryskibacteria	20	59	0	18	0	0	0	0	0	0	0	0	0	0	0	0	153	0	0	0	0	0	0	0	0	0
ASV_1191	Bacteria	Bacteroidota	Bacteroidia	Cytophagales	Cytophagaceae	unclassified_Cytophagaceae	unclassified_Cytophagaceae	0	0	28	222	0	0	0	0	0	0	0	0	0	0	0	0	0	0	0	0	0	0	0	0	0	0
ASV_1192	Bacteria	Bacteroidota	Bacteroidia	Flavobacteriales	Flavobacteriaceae	Antarcticibacterium	unclassified_Antarcticibacterium	0	0	0	8	0	0	0	0	0	0	0	0	0	0	0	0	0	0	0	238	0	0	4	0	0	0
ASV_1193	Bacteria	Verrucomicrobiota	Verrucomicrobiae	Chthoniobacterales	Chthoniobacteraceae	Chthoniobacter	unclassified_Chthoniobacter	0	0	0	0	0	0	0	0	0	0	0	0	0	0	0	0	0	0	0	120	0	0	0	130	0	0
ASV_1194	Bacteria	Actinobacteriota	Thermoleophilia	Solirubrobacterales	67-14	unclassified_67-14	unclassified_67-14	0	0	0	0	0	0	0	0	0	0	0	0	0	0	0	0	0	0	0	46	0	0	0	203	0	0
ASV_1195	Bacteria	Sumerlaeota	Sumerlaeia	Sumerlaeales	Sumerlaeaceae	Sumerlaea	unclassified_Sumerlaea	0	0	25	0	12	0	71	34	0	0	0	0	0	0	0	0	0	0	0	65	0	0	0	41	0	0
ASV_1196	Bacteria	Bacteroidota	Bacteroidia	Sphingobacteriales	Sphingobacteriaceae	Mucilaginibacter	unclassified_Mucilaginibacter	0	0	0	0	0	0	0	0	134	44	0	57	0	0	0	0	13	0	0	0	0	0	0	0	0	0
ASV_1197	Bacteria	Verrucomicrobiota	Verrucomicrobiae	Chthoniobacterales	Chthoniobacteraceae	Candidatus Udaeobacter	unclassified_Candidatus Udaeobacter	0	0	0	55	0	0	0	0	0	0	0	0	0	0	44	148	0	0	0	0	0	0	0	0	0	0
ASV_1198	Bacteria	Actinobacteriota	Thermoleophilia	Gaiellales	Gaiellaceae	Gaiella	unclassified_Gaiella	0	0	0	0	15	0	16	45	0	0	0	0	0	0	12	0	0	32	50	0	0	77	0	0	0	0
ASV_1199	Bacteria	Proteobacteria	Gammaproteobacteria	Legionellales	Legionellaceae	Legionella	unclassified_Legionella	0	0	0	0	0	0	64	22	0	0	0	0	0	0	0	0	0	21	0	74	27	0	0	39	0	0
ASV_1200	Bacteria	Chloroflexi	KD4-96	unclassified_KD4-96	unclassified_KD4-96	unclassified_KD4-96	unclassified_KD4-96	0	0	0	0	0	0	0	0	0	0	0	0	0	0	0	0	0	0	0	0	0	0	247	0	0	0
ASV_1201	Bacteria	Actinobacteriota	Thermoleophilia	Solirubrobacterales	67-14	unclassified_67-14	unclassified_67-14	0	0	0	0	0	0	0	0	0	0	0	0	58	0	0	0	0	0	0	0	0	0	0	0	23	165
ASV_1202	Bacteria	Gemmatimonadota	S0134 terrestrial group	unclassified_S0134 terrestrial group	unclassified_S0134 terrestrial group	unclassified_S0134 terrestrial group	unclassified_S0134 terrestrial group	0	0	0	0	0	0	0	0	0	0	0	0	0	0	0	0	0	0	0	0	0	0	246	0	0	0
ASV_1203	Bacteria	Planctomycetota	Planctomycetes	Isosphaerales	Isosphaeraceae	unclassified_Isosphaeraceae	unclassified_Isosphaeraceae	5	0	17	30	14	16	30	21	5	0	0	0	0	0	31	0	30	0	0	29	0	6	0	11	0	0
ASV_1204	Bacteria	Chloroflexi	KD4-96	unclassified_KD4-96	unclassified_KD4-96	unclassified_KD4-96	unclassified_KD4-96	0	0	0	0	0	0	0	0	0	0	0	0	0	0	0	0	0	0	0	0	0	0	245	0	0	0
ASV_1205	Bacteria	Bacteroidota	Bacteroidia	Flavobacteriales	Flavobacteriaceae	Flavimarina	unclassified_Flavimarina	174	22	0	0	15	19	0	0	3	0	0	0	0	0	0	0	8	3	0	0	0	0	0	0	0	0
ASV_1206	Bacteria	Verrucomicrobiota	Verrucomicrobiae	Chthoniobacterales	Chthoniobacteraceae	Chthoniobacter	unclassified_Chthoniobacter	23	0	0	0	23	0	52	46	0	0	0	0	0	10	0	0	0	57	33	0	0	0	0	0	0	0
ASV_1207	Bacteria	Acidobacteriota	Vicinamibacteria	Vicinamibacterales	unclassified_Vicinamibacterales	unclassified_Vicinamibacterales	unclassified_Vicinamibacterales	0	0	0	0	0	0	0	0	0	0	0	0	0	0	36	51	0	0	0	0	0	0	0	0	0	157
ASV_1208	Bacteria	Chloroflexi	Anaerolineae	Ardenticatenales	Ardenticatenaceae	unclassified_Ardenticatenaceae	unclassified_Ardenticatenaceae	0	0	0	0	0	0	0	0	0	0	0	0	0	0	0	0	0	0	244	0	0	0	0	0	0	0
ASV_1209	Bacteria	Acidobacteriota	Blastocatellia	Blastocatellales	Blastocatellaceae	Blastocatella	unclassified_Blastocatella	0	70	0	75	0	0	0	0	0	0	0	40	0	0	0	58	0	0	0	0	0	0	0	0	0	0
ASV_1210	Bacteria	Proteobacteria	Alphaproteobacteria	Rhizobiales	Xanthobacteraceae	Pseudorhodoplanes	unclassified_Pseudorhodoplanes	0	0	35	0	66	23	36	44	0	0	0	0	0	0	0	0	0	39	0	0	0	0	0	0	0	0
ASV_1211	Bacteria	Bacteroidota	Bacteroidia	Chitinophagales	Chitinophagaceae	unclassified_Chitinophagaceae	unclassified_Chitinophagaceae	0	0	29	0	38	18	25	16	0	0	0	0	0	0	27	0	90	0	0	0	0	0	0	0	0	0
ASV_1212	Bacteria	Deinococcota	Deinococci	Deinococcales	Trueperaceae	Truepera	unclassified_Truepera	0	0	0	0	0	0	0	0	0	0	0	0	0	0	139	0	0	0	10	94	0	0	0	0	0	0
ASV_1213	Bacteria	Proteobacteria	Alphaproteobacteria	Rhodobacterales	Rhodobacteraceae	Oceanicella	unclassified_Oceanicella	0	0	0	0	0	0	0	0	0	0	0	0	0	0	0	0	0	0	0	0	18	0	225	0	0	0
ASV_1214	Bacteria	Actinobacteriota	Actinobacteria	Frankiales	Sporichthyaceae	unclassified_Sporichthyaceae	unclassified_Sporichthyaceae	0	0	0	0	0	0	0	0	0	0	0	0	242	0	0	0	0	0	0	0	0	0	0	0	0	0
ASV_1215	Bacteria	Actinobacteriota	Thermoleophilia	Solirubrobacterales	67-14	unclassified_67-14	unclassified_67-14	0	0	0	0	0	0	0	0	0	0	0	0	29	0	0	0	0	0	28	0	0	0	0	0	0	185
ASV_1216	Bacteria	Gemmatimonadota	Gemmatimonadetes	Gemmatimonadales	Gemmatimonadaceae	Gemmatimonas	unclassified_Gemmatimonas	0	41	0	121	0	0	0	0	0	0	0	0	0	0	0	0	79	0	0	0	0	0	0	0	0	0
ASV_1217	Bacteria	Actinobacteriota	Acidimicrobiia	IMCC26256	unclassified_IMCC26256	unclassified_IMCC26256	unclassified_IMCC26256	0	0	28	3	19	8	0	0	51	8	0	6	0	0	7	0	21	33	0	0	0	0	0	4	21	32
ASV_1218	Bacteria	Bacteroidota	Bacteroidia	Chitinophagales	Chitinophagaceae	Flavisolibacter	rigui	0	0	0	0	0	0	0	25	0	0	0	0	0	0	0	0	0	216	0	0	0	0	0	0	0	0
ASV_1219	Bacteria	Proteobacteria	Gammaproteobacteria	Nitrosococcales	Nitrosococcaceae	wb1-P19	unclassified_wb1-P19	0	0	0	0	0	0	0	0	0	0	0	0	0	0	83	158	0	0	0	0	0	0	0	0	0	0
ASV_1220	Bacteria	Proteobacteria	Alphaproteobacteria	Rhodobacterales	Rhodobacteraceae	Flavimaricola	unclassified_Flavimaricola	0	0	0	0	0	0	0	0	0	0	0	0	0	0	0	0	0	0	116	0	87	38	0	0	0	0
ASV_1221	Bacteria	Nitrospirota	Nitrospiria	Nitrospirales	Nitrospiraceae	Nitrospira	unclassified_Nitrospira	0	0	0	0	0	0	0	0	0	0	0	0	0	0	0	0	0	0	22	19	35	0	165	0	0	0
ASV_1222	Bacteria	Proteobacteria	Gammaproteobacteria	Burkholderiales	TRA3-20	unclassified_TRA3-20	unclassified_TRA3-20	0	0	0	0	0	0	0	0	0	0	0	0	0	0	0	0	0	0	18	0	0	0	0	0	24	199
ASV_1223	Bacteria	Actinobacteriota	Thermoleophilia	Solirubrobacterales	Solirubrobacteraceae	Solirubrobacter	unclassified_Solirubrobacter	0	0	0	0	0	0	0	0	0	0	0	0	0	0	0	0	0	0	0	0	0	0	0	241	0	0
ASV_1224	Bacteria	Bacteroidota	Bacteroidia	Sphingobacteriales	env.OPS 17	unclassified_env.OPS 17	unclassified_env.OPS 17	69	0	0	99	0	0	16	0	0	0	0	0	56	0	0	0	0	0	0	0	0	0	0	0	0	0
ASV_1225	Bacteria	Actinobacteriota	Rubrobacteria	Rubrobacterales	Rubrobacteriaceae	Rubrobacter	unclassified_Rubrobacter	0	0	35	0	0	18	44	119	0	0	0	0	0	0	0	0	0	24	0	0	0	0	0	0	0	0
ASV_1226	Bacteria	Armatimonadota	unclassified_Armatimonadota	unclassified_Armatimonadota	unclassified_Armatimonadota	unclassified_Armatimonadota	unclassified_Armatimonadota	0	0	0	0	0	0	0	0	0	0	0	0	0	0	0	0	0	0	0	93	0	0	0	147	0	0
ASV_1227	Bacteria	Gemmatimonadota	Gemmatimonadetes	Gemmatimonadales	Gemmatimonadaceae	unclassified_Gemmatimonadaceae	unclassified_Gemmatimonadaceae	0	0	0	0	0	0	0	0	0	0	0	0	0	0	0	0	0	0	0	0	0	0	0	0	0	240
ASV_1228	Bacteria	Chloroflexi	Chloroflexia	Thermomicrobiales	JG30-KF-CM45	unclassified_JG30-KF-CM45	unclassified_JG30-KF-CM45	25	0	0	31	32	0	32	14	0	0	0	0	0	0	24	28	13	34	0	0	0	6	0	0	0	0
ASV_1229	Bacteria	Abditibacteriota	Abditibacteria	Abditibacteriales	Abditibacteriaceae	Abditibacterium	unclassified_Abditibacterium	0	19	23	0	21	0	39	74	8	0	0	12	0	0	12	0	0	28	0	0	0	0	0	0	0	3
ASV_1230	Bacteria	Abditibacteriota	Abditibacteria	Abditibacteriales	Abditibacteriaceae	Abditibacterium	unclassified_Abditibacterium	0	0	0	62	0	0	0	0	0	0	0	0	0	0	0	24	0	0	0	0	0	0	0	153	0	0
ASV_1231	Bacteria	Bacteroidota	Bacteroidia	Cytophagales	Hymenobacteraceae	Hymenobacter	unclassified_Hymenobacter	0	0	0	39	0	0	0	17	0	0	0	0	0	0	64	98	0	0	11	0	0	10	0	0	0	0
ASV_1232	Bacteria	Proteobacteria	Gammaproteobacteria	Burkholderiales	Comamonadaceae	unclassified_Comamonadaceae	unclassified_Comamonadaceae	0	0	0	0	239	0	0	0	0	0	0	0	0	0	0	0	0	0	0	0	0	0	0	0	0	0
ASV_1233	Bacteria	Proteobacteria	Gammaproteobacteria	Nitrosococcales	Nitrosococcaceae	wb1-P19	unclassified_wb1-P19	0	0	0	0	0	0	0	132	0	0	0	0	0	0	0	0	0	107	0	0	0	0	0	0	0	0
ASV_1234	Bacteria	Bacteroidota	Bacteroidia	Chitinophagales	Chitinophagaceae	Ferruginibacter	unclassified_Ferruginibacter	0	0	0	0	0	0	0	0	196	0	43	0	0	0	0	0	0	0	0	0	0	0	0	0	0	0
ASV_1235	Bacteria	Gemmatimonadota	Gemmatimonadetes	Gemmatimonadales	Gemmatimonadaceae	Gemmatimonas	unclassified_Gemmatimonas	0	0	7	0	29	0	21	0	41	0	0	0	56	51	0	20	0	13	0	0	0	0	0	0	0	0
ASV_1236	Bacteria	Actinobacteriota	Thermoleophilia	Solirubrobacterales	unclassified_Solirubrobacterales	unclassified_Solirubrobacterales	unclassified_Solirubrobacterales	0	0	0	0	0	0	0	55	0	0	0	0	0	0	0	84	0	99	0	0	0	0	0	0	0	0
ASV_1237	Bacteria	Deinococcota	Deinococci	Deinococcales	Trueperaceae	Truepera	unclassified_Truepera	0	0	0	0	0	0	0	0	0	0	0	0	0	0	0	0	0	0	0	0	0	0	0	238	0	0
ASV_1238	Bacteria	Bacteroidota	Bacteroidia	Flavobacteriales	Flavobacteriaceae	Flavobacterium	unclassified_Flavobacterium	50	62	12	32	15	18	35	0	0	0	0	0	0	0	0	0	13	0	0	0	0	0	0	0	0	0
ASV_1239	Bacteria	Bacteroidota	Bacteroidia	Chitinophagales	Chitinophagaceae	Ferruginibacter	unclassified_Ferruginibacter	31	0	0	0	14	0	0	0	0	0	0	0	0	0	148	0	44	0	0	0	0	0	0	0	0	0
ASV_1240	Bacteria	Planctomycetota	Phycisphaerae	Tepidisphaerales	WD2101 soil group	unclassified_WD2101 soil group	unclassified_WD2101 soil group	0	42	0	40	7	0	0	0	0	0	0	0	0	0	0	0	148	0	0	0	0	0	0	0	0	0
ASV_1241	Bacteria	Bacteroidota	Bacteroidia	Flavobacteriales	Crocinitomicaceae	Fluviicola	unclassified_Fluviicola	0	12	0	5	5	0	0	0	0	0	0	0	0	0	0	20	67	0	17	0	78	0	27	6	0	0
ASV_1242	Bacteria	Cyanobacteria	Cyanobacteriia	Cyanobacteriales	Chroococcidiopsaceae	Aliterella	unclassified_Aliterella	0	0	0	92	0	0	82	0	0	0	0	0	0	0	60	0	0	0	0	0	0	0	0	0	3	0
ASV_1243	Bacteria	Proteobacteria	Alphaproteobacteria	Micropepsales	Micropepsaceae	unclassified_Micropepsaceae	unclassified_Micropepsaceae	0	0	0	0	0	0	0	0	0	0	12	0	225	0	0	0	0	0	0	0	0	0	0	0	0	0
ASV_1244	Bacteria	Verrucomicrobiota	Verrucomicrobiae	Opitutales	Opitutaceae	Lacunisphaera	unclassified_Lacunisphaera	0	0	0	0	0	0	0	0	0	0	0	0	222	15	0	0	0	0	0	0	0	0	0	0	0	0
ASV_1245	Bacteria	Proteobacteria	Gammaproteobacteria	Xanthomonadales	Xanthomonadaceae	Thermomonas	unclassified_Thermomonas	0	0	0	0	0	0	0	0	0	0	0	0	182	55	0	0	0	0	0	0	0	0	0	0	0	0
ASV_1246	Bacteria	Proteobacteria	Gammaproteobacteria	Burkholderiales	Comamonadaceae	unclassified_Comamonadaceae	unclassified_Comamonadaceae	0	0	0	0	0	0	0	0	0	0	236	0	0	0	0	0	0	0	0	0	0	0	0	0	0	0
ASV_1247	Bacteria	Actinobacteriota	Thermoleophilia	Gaiellales	unclassified_Gaiellales	unclassified_Gaiellales	unclassified_Gaiellales	0	0	0	0	0	0	0	0	0	0	0	0	194	42	0	0	0	0	0	0	0	0	0	0	0	0
ASV_1248	Bacteria	Bdellovibrionota	Bdellovibrionia	Bdellovibrionales	Bdellovibrionaceae	Bdellovibrio	unclassified_Bdellovibrio	37	0	0	21	0	0	0	0	0	0	0	0	0	0	0	0	177	0	0	0	0	0	0	0	0	0
ASV_1249	Bacteria	Proteobacteria	Alphaproteobacteria	Rhizobiales	Rhizobiaceae	Allorhizobium-Neorhizobium-Pararhizobium-Rhizobium	unclassified_Allorhizobium-Neorhizobium-Pararhizobium-Rhizobium	0	74	24	0	26	16	0	0	0	0	0	8	11	0	13	0	63	0	0	0	0	0	0	0	0	0
ASV_1250	Bacteria	Bacteroidota	Rhodothermia	Rhodothermales	Rhodothermaceae	Rubrivirga	unclassified_Rubrivirga	0	0	0	117	0	0	92	0	0	0	0	0	0	0	0	26	0	0	0	0	0	0	0	0	0	0
ASV_1251	Bacteria	Myxococcota	Myxococcia	Myxococcales	Myxococcaceae	unclassified_Myxococcaceae	unclassified_Myxococcaceae	67	108	0	9	0	0	0	0	0	0	0	0	0	0	0	0	50	0	0	0	0	0	0	0	0	0
ASV_1252	Bacteria	Actinobacteriota	Thermoleophilia	Solirubrobacterales	67-14	unclassified_67-14	unclassified_67-14	0	0	0	150	0	0	0	0	0	0	0	0	0	0	0	24	60	0	0	0	0	0	0	0	0	0
ASV_1253	Bacteria	Deinococcota	Deinococci	Deinococcales	Trueperaceae	Truepera	unclassified_Truepera	0	0	0	0	0	0	0	0	0	0	0	0	0	0	0	0	0	0	0	0	0	0	0	234	0	0
ASV_1254	Bacteria	Chloroflexi	Anaerolineae	Ardenticatenales	Ardenticatenaceae	unclassified_Ardenticatenaceae	unclassified_Ardenticatenaceae	9	0	62	0	0	0	0	0	0	0	0	0	0	0	16	0	0	0	102	0	0	44	0	0	0	0
ASV_1255	Bacteria	Armatimonadota	Fimbriimonadia	Fimbriimonadales	Fimbriimonadaceae	unclassified_Fimbriimonadaceae	unclassified_Fimbriimonadaceae	6	18	0	110	50	0	0	0	0	0	0	0	0	0	24	10	15	0	0	0	0	0	0	0	0	0
ASV_1256	Bacteria	Acidobacteriota	Acidobacteriae	Bryobacterales	Bryobacteraceae	Bryobacter	unclassified_Bryobacter	0	0	0	0	22	0	21	17	0	0	0	0	0	0	77	96	0	0	0	0	0	0	0	0	0	0
ASV_1257	Bacteria	Bacteroidota	Bacteroidia	Chitinophagales	Chitinophagaceae	Edaphobaculum	unclassified_Edaphobaculum	27	25	118	19	7	12	14	10	0	0	0	0	0	0	0	0	0	0	0	0	0	0	0	0	0	0
ASV_1258	Bacteria	Cyanobacteria	Cyanobacteriia	Leptolyngbyales	Leptolyngbyaceae	Leptolyngbya PCC-6306	unclassified_Leptolyngbya PCC-6306	0	0	20	24	0	0	38	12	0	0	0	0	3	0	5	55	0	0	53	0	0	18	0	0	0	4
ASV_1259	Bacteria	Cyanobacteria	Cyanobacteriia	Phormidesmiales	Phormidesmiaceae	Phormidesmis ANT.LACV5.1	unclassified_Phormidesmis ANT.LACV5.1	0	0	0	193	0	0	0	0	0	0	0	0	0	0	0	39	0	0	0	0	0	0	0	0	0	0
ASV_1260	Bacteria	Bacteroidota	Bacteroidia	Chitinophagales	Chitinophagaceae	Segetibacter	unclassified_Segetibacter	0	0	0	109	0	0	0	0	0	0	0	0	0	0	0	123	0	0	0	0	0	0	0	0	0	0
ASV_1261	Bacteria	Chloroflexi	Ktedonobacteria	C0119	unclassified_C0119	unclassified_C0119	unclassified_C0119	0	0	0	0	70	16	18	14	0	0	0	0	0	0	55	51	0	0	0	0	0	8	0	0	0	0
ASV_1262	Bacteria	Acidobacteriota	Vicinamibacteria	Vicinamibacterales	Vicinamibacteraceae	unclassified_Vicinamibacteraceae	unclassified_Vicinamibacteraceae	0	0	0	0	21	0	33	78	0	0	0	0	0	0	0	0	0	0	54	0	0	26	0	0	0	20
ASV_1263	Bacteria	Bacteroidota	Bacteroidia	Chitinophagales	Chitinophagaceae	Flavisolibacter	unclassified_Flavisolibacter	0	0	0	0	14	21	0	73	0	0	0	0	0	0	0	0	0	123	0	0	0	0	0	0	0	0
ASV_1264	Bacteria	Actinobacteriota	Actinobacteria	Corynebacteriales	Mycobacteriaceae	Mycobacterium	unclassified_Mycobacterium	0	0	0	0	0	0	0	0	0	0	0	0	231	0	0	0	0	0	0	0	0	0	0	0	0	0
ASV_1265	Bacteria	Proteobacteria	Alphaproteobacteria	unclassified_Alphaproteobacteria	unclassified_Alphaproteobacteria	unclassified_Alphaproteobacteria	unclassified_Alphaproteobacteria	0	0	0	0	0	0	0	0	0	0	0	0	0	0	0	0	0	18	0	51	0	44	0	0	9	109
ASV_1266	Bacteria	Bacteroidota	Bacteroidia	Chitinophagales	Chitinophagaceae	Ferruginibacter	unclassified_Ferruginibacter	37	0	0	0	53	32	74	0	0	0	0	0	0	0	0	0	0	34	0	0	0	0	0	0	0	0
ASV_1267	Bacteria	Proteobacteria	Gammaproteobacteria	Nitrosococcales	Nitrosococcaceae	SZB85	unclassified_SZB85	14	0	36	0	46	0	19	0	0	0	0	0	0	0	115	0	0	0	0	0	0	0	0	0	0	0
ASV_1268	Bacteria	Chloroflexi	TK10	unclassified_TK10	unclassified_TK10	unclassified_TK10	unclassified_TK10	0	0	0	0	15	0	6	18	0	0	0	0	0	0	0	0	0	77	0	9	0	105	0	0	0	0
ASV_1269	Bacteria	Planctomycetota	Phycisphaerae	Tepidisphaerales	unclassified_Tepidisphaerales	unclassified_Tepidisphaerales	unclassified_Tepidisphaerales	0	0	0	0	0	0	0	0	0	0	0	0	5	0	0	0	0	0	0	0	0	9	0	0	6	210
ASV_1270	Bacteria	Acidobacteriota	Vicinamibacteria	Vicinamibacterales	unclassified_Vicinamibacterales	unclassified_Vicinamibacterales	unclassified_Vicinamibacterales	0	0	0	0	0	0	0	0	0	0	0	0	0	0	0	0	0	0	0	0	0	230	0	0	0	0
ASV_1271	Bacteria	Chloroflexi	Ktedonobacteria	C0119	unclassified_C0119	unclassified_C0119	unclassified_C0119	12	0	0	17	23	25	17	6	0	0	0	0	0	0	22	23	84	0	0	0	0	0	0	0	0	0
ASV_1272	Bacteria	Bacteroidota	Bacteroidia	Chitinophagales	Chitinophagaceae	Ferruginibacter	unclassified_Ferruginibacter	0	0	0	0	0	0	0	0	20	0	0	17	93	72	0	0	27	0	0	0	0	0	0	0	0	0
ASV_1273	Bacteria	Chloroflexi	Chloroflexia	Thermomicrobiales	Thermomicrobiaceae	Sphaerobacter	unclassified_Sphaerobacter	0	0	0	0	0	0	0	0	0	0	0	0	0	0	0	0	0	0	0	0	9	0	220	0	0	0
ASV_1274	Bacteria	Chloroflexi	Chloroflexia	Thermomicrobiales	JG30-KF-CM45	unclassified_JG30-KF-CM45	unclassified_JG30-KF-CM45	36	0	32	0	0	11	19	47	7	0	0	0	0	0	0	0	33	21	22	0	0	0	0	0	0	0
ASV_1276	Bacteria	Bacteroidota	Bacteroidia	Chitinophagales	Chitinophagaceae	unclassified_Chitinophagaceae	unclassified_Chitinophagaceae	0	152	0	0	0	0	0	0	0	0	0	0	0	0	0	0	76	0	0	0	0	0	0	0	0	0
ASV_1277	Bacteria	Chloroflexi	Chloroflexia	Thermomicrobiales	JG30-KF-CM45	unclassified_JG30-KF-CM45	unclassified_JG30-KF-CM45	0	9	0	0	0	0	23	102	0	0	0	0	0	0	0	0	0	94	0	0	0	0	0	0	0	0
ASV_1278	Bacteria	Proteobacteria	Gammaproteobacteria	Xanthomonadales	Xanthomonadaceae	unclassified_Xanthomonadaceae	unclassified_Xanthomonadaceae	0	0	0	137	0	0	0	0	27	0	0	10	0	0	13	0	41	0	0	0	0	0	0	0	0	0
ASV_1279	Bacteria	Bacteroidota	Bacteroidia	Flavobacteriales	Flavobacteriaceae	unclassified_Flavobacteriaceae	unclassified_Flavobacteriaceae	0	0	0	0	0	0	0	0	0	0	0	0	0	0	0	0	0	0	137	0	0	91	0	0	0	0
ASV_1280	Bacteria	Actinobacteriota	Actinobacteria	Propionibacteriales	Nocardioidaceae	Nocardioides	unclassified_Nocardioides	81	0	67	0	79	0	0	0	0	0	0	0	0	0	0	0	0	0	0	0	0	0	0	0	0	0
ASV_1281	Bacteria	Bacteroidota	Bacteroidia	Cytophagales	Spirosomaceae	Dyadobacter	unclassified_Dyadobacter	29	0	0	27	129	33	0	0	0	0	0	9	0	0	0	0	0	0	0	0	0	0	0	0	0	0
ASV_1282	Bacteria	Bacteroidota	Bacteroidia	Chitinophagales	Chitinophagaceae	Ferruginibacter	unclassified_Ferruginibacter	0	0	0	0	0	0	0	0	227	0	0	0	0	0	0	0	0	0	0	0	0	0	0	0	0	0
ASV_1283	Bacteria	Myxococcota	Polyangia	Haliangiales	Haliangiaceae	Haliangium	unclassified_Haliangium	0	0	0	0	0	0	0	0	0	0	157	70	0	0	0	0	0	0	0	0	0	0	0	0	0	0
ASV_1284	Bacteria	Proteobacteria	Gammaproteobacteria	PLTA13	unclassified_PLTA13	unclassified_PLTA13	unclassified_PLTA13	0	0	0	0	0	0	0	0	0	0	0	0	0	0	0	0	0	0	227	0	0	0	0	0	0	0
ASV_1285	Bacteria	Acidobacteriota	Holophagae	Subgroup 7	unclassified_Subgroup 7	unclassified_Subgroup 7	unclassified_Subgroup 7	0	0	0	0	0	0	0	0	0	0	0	0	0	0	0	0	0	0	111	0	0	0	0	116	0	0
ASV_1286	Bacteria	Planctomycetota	Planctomycetes	Planctomycetales	unclassified_Planctomycetales	unclassified_Planctomycetales	unclassified_Planctomycetales	0	0	0	0	0	0	0	0	0	0	0	0	0	0	0	0	0	0	7	0	204	0	0	16	0	0
ASV_1287	Bacteria	Planctomycetota	Planctomycetes	Planctomycetales	unclassified_Planctomycetales	unclassified_Planctomycetales	unclassified_Planctomycetales	0	0	0	0	11	0	0	0	0	0	0	0	177	0	0	0	0	0	7	0	0	0	0	0	8	23
ASV_1288	Bacteria	Chloroflexi	Chloroflexia	Thermomicrobiales	JG30-KF-CM45	unclassified_JG30-KF-CM45	unclassified_JG30-KF-CM45	0	0	0	0	0	0	57	0	0	0	0	0	0	0	0	0	0	0	0	72	38	0	0	51	8	0
ASV_1289	Bacteria	Acidobacteriota	Holophagae	Subgroup 7	unclassified_Subgroup 7	unclassified_Subgroup 7	unclassified_Subgroup 7	0	0	0	0	0	0	0	0	0	0	0	0	0	0	0	226	0	0	0	0	0	0	0	0	0	0
ASV_1290	Bacteria	Proteobacteria	Alphaproteobacteria	Caedibacterales	Caedibacteraceae	Caedibacter	unclassified_Caedibacter	0	151	0	0	0	0	0	0	5	0	0	0	0	0	0	0	66	0	0	0	0	0	0	0	0	3
ASV_1291	Bacteria	Actinobacteriota	Thermoleophilia	Gaiellales	unclassified_Gaiellales	unclassified_Gaiellales	unclassified_Gaiellales	0	0	0	0	0	7	0	0	0	0	0	0	0	0	0	0	0	0	0	100	48	0	0	70	0	0
ASV_1292	Bacteria	Gemmatimonadota	Gemmatimonadetes	Gemmatimonadales	Gemmatimonadaceae	unclassified_Gemmatimonadaceae	unclassified_Gemmatimonadaceae	0	0	0	0	0	0	0	82	0	0	0	0	0	0	0	64	0	79	0	0	0	0	0	0	0	0
ASV_1293	Bacteria	Sumerlaeota	Sumerlaeia	Sumerlaeales	Sumerlaeaceae	Sumerlaea	unclassified_Sumerlaea	0	0	0	0	0	0	0	0	0	0	4	7	131	47	0	0	0	0	0	0	0	5	0	0	0	31
ASV_1294	Bacteria	Myxococcota	Polyangia	Polyangiales	Polyangiaceae	Pajaroellobacter	unclassified_Pajaroellobacter	17	16	0	126	0	0	0	0	0	0	0	9	0	0	0	0	56	0	0	0	0	0	0	0	0	0
ASV_1295	Bacteria	Verrucomicrobiota	Verrucomicrobiae	Chthoniobacterales	Chthoniobacteraceae	Chthoniobacter	unclassified_Chthoniobacter	0	0	0	0	0	0	28	0	0	0	0	0	0	0	0	0	0	0	15	58	65	0	58	0	0	0
ASV_1296	Bacteria	Actinobacteriota	Thermoleophilia	Solirubrobacterales	Solirubrobacteraceae	unclassified_Solirubrobacteraceae	unclassified_Solirubrobacteraceae	0	0	0	0	0	0	0	0	0	0	0	0	0	0	0	224	0	0	0	0	0	0	0	0	0	0
ASV_1297	Bacteria	Actinobacteriota	Actinobacteria	Propionibacteriales	Nocardioidaceae	Marmoricola	unclassified_Marmoricola	16	0	0	0	39	0	0	20	26	0	0	0	0	0	0	0	32	0	53	0	0	0	0	0	37	0
ASV_1298	Bacteria	Planctomycetota	Planctomycetes	Isosphaerales	Isosphaeraceae	Isosphaera	unclassified_Isosphaera	0	0	37	33	25	33	0	0	0	0	0	0	0	0	37	0	58	0	0	0	0	0	0	0	0	0
ASV_1299	Bacteria	Actinobacteriota	Actinobacteria	Euzebyales	Euzebyaceae	unclassified_Euzebyaceae	unclassified_Euzebyaceae	0	0	0	0	0	0	0	0	0	0	0	0	0	0	0	0	0	0	0	0	223	0	0	0	0	0
ASV_1300	Bacteria	Proteobacteria	Alphaproteobacteria	Rhizobiales	Devosiaceae	Devosia	glacialis	39	25	35	16	21	16	39	0	0	0	0	0	0	0	0	0	31	0	0	0	0	0	0	0	0	0
ASV_1301	Bacteria	Actinobacteriota	Actinobacteria	Micromonosporales	Micromonosporaceae	Micromonospora	unclassified_Micromonospora	8	0	61	0	0	0	153	0	0	0	0	0	0	0	0	0	0	0	0	0	0	0	0	0	0	0
ASV_1302	Bacteria	Proteobacteria	Gammaproteobacteria	Burkholderiales	Oxalobacteraceae	Massilia	unclassified_Massilia	0	0	0	87	0	0	134	0	0	0	0	0	0	0	0	0	0	0	0	0	0	0	0	0	0	0
ASV_1303	Bacteria	Actinobacteriota	Actinobacteria	Propionibacteriales	unclassified_Propionibacteriales	unclassified_Propionibacteriales	unclassified_Propionibacteriales	0	0	0	0	0	111	0	99	0	0	0	0	0	0	0	0	0	0	0	11	0	0	0	0	0	0
ASV_1304	Bacteria	Proteobacteria	Gammaproteobacteria	Burkholderiales	Sutterellaceae	unclassified_Sutterellaceae	unclassified_Sutterellaceae	0	0	0	0	0	0	0	221	0	0	0	0	0	0	0	0	0	0	0	0	0	0	0	0	0	0
ASV_1305	Bacteria	Actinobacteriota	Acidimicrobiia	unclassified_Acidimicrobiia	unclassified_Acidimicrobiia	unclassified_Acidimicrobiia	unclassified_Acidimicrobiia	0	0	0	0	0	0	0	12	0	0	0	0	0	0	22	187	0	0	0	0	0	0	0	0	0	0
ASV_1306	Bacteria	Proteobacteria	Gammaproteobacteria	Burkholderiales	Nitrosomonadaceae	unclassified_Nitrosomonadaceae	unclassified_Nitrosomonadaceae	5	0	0	0	13	11	7	27	0	0	0	0	0	0	0	27	0	124	0	0	0	6	0	0	0	0
ASV_1307	Bacteria	Bacteroidota	Bacteroidia	Chitinophagales	Chitinophagaceae	Flavisolibacter	unclassified_Flavisolibacter	0	72	0	148	0	0	0	0	0	0	0	0	0	0	0	0	0	0	0	0	0	0	0	0	0	0
ASV_1308	Bacteria	Bacteroidota	Bacteroidia	Cytophagales	Microscillaceae	OLB12	unclassified_OLB12	0	30	0	12	0	0	0	0	44	0	0	0	0	0	0	0	134	0	0	0	0	0	0	0	0	0
ASV_1309	Bacteria	Bacteroidota	Bacteroidia	Sphingobacteriales	NS11-12 marine group	unclassified_NS11-12 marine group	unclassified_NS11-12 marine group	0	0	47	0	28	0	29	45	13	0	0	25	0	0	0	0	8	0	11	0	0	14	0	0	0	0
ASV_1310	Bacteria	Bacteroidota	Bacteroidia	Chitinophagales	unclassified_Chitinophagales	unclassified_Chitinophagales	unclassified_Chitinophagales	0	0	0	0	11	0	21	45	0	0	0	0	0	0	30	0	0	0	11	90	0	0	0	12	0	0
ASV_1311	Bacteria	Chloroflexi	Anaerolineae	SBR1031	A4b	unclassified_A4b	unclassified_A4b	0	0	0	0	0	0	0	0	0	0	0	0	0	79	0	0	0	85	56	0	0	0	0	0	0	0
ASV_1312	Bacteria	Actinobacteriota	Actinobacteria	Frankiales	unclassified_Frankiales	unclassified_Frankiales	unclassified_Frankiales	0	0	0	0	0	0	0	0	0	0	0	0	0	0	0	0	0	0	0	85	0	0	0	135	0	0
ASV_1313	Bacteria	Actinobacteriota	Actinobacteria	Micrococcales	Microbacteriaceae	unclassified_Microbacteriaceae	unclassified_Microbacteriaceae	63	0	27	18	51	60	0	0	0	0	0	0	0	0	0	0	0	0	0	0	0	0	0	0	0	0
ASV_1314	Bacteria	Proteobacteria	Gammaproteobacteria	Pseudomonadales	Spongiibacteraceae	unclassified_Spongiibacteraceae	unclassified_Spongiibacteraceae	7	11	0	0	0	0	0	0	0	0	0	0	0	0	0	0	0	0	194	0	0	7	0	0	0	0
ASV_1315	Bacteria	Chloroflexi	Anaerolineae	SBR1031	A4b	unclassified_A4b	unclassified_A4b	0	10	0	0	0	0	0	0	0	0	0	22	46	25	0	0	116	0	0	0	0	0	0	0	0	0
ASV_1316	Bacteria	Actinobacteriota	Actinobacteria	Propionibacteriales	Nocardioidaceae	unclassified_Nocardioidaceae	unclassified_Nocardioidaceae	0	0	0	0	0	99	67	53	0	0	0	0	0	0	0	0	0	0	0	0	0	0	0	0	0	0
ASV_1317	Bacteria	Acidobacteriota	Blastocatellia	Blastocatellales	Blastocatellaceae	Blastocatella	unclassified_Blastocatella	0	0	0	0	0	0	0	0	0	0	0	0	0	0	0	0	0	40	0	0	0	0	0	179	0	0
ASV_1318	Bacteria	Bacteroidota	Bacteroidia	Flavobacteriales	NS9 marine group	unclassified_NS9 marine group	unclassified_NS9 marine group	0	0	0	0	0	0	0	0	0	0	0	0	0	0	0	0	0	0	0	0	0	0	219	0	0	0
ASV_1319	Bacteria	Actinobacteriota	Thermoleophilia	Solirubrobacterales	Solirubrobacteraceae	Solirubrobacter	unclassified_Solirubrobacter	0	0	0	0	0	0	0	0	0	0	0	0	0	0	0	0	0	0	0	0	0	0	0	219	0	0
ASV_1320	Bacteria	Proteobacteria	Alphaproteobacteria	Sphingomonadales	Sphingomonadaceae	Altererythrobacter	unclassified_Altererythrobacter	16	5	124	0	22	0	8	0	0	0	0	0	0	0	0	0	27	0	0	0	0	0	0	0	0	16
ASV_1321	Bacteria	Bdellovibrionota	Bdellovibrionia	Bdellovibrionales	Bdellovibrionaceae	Bdellovibrio	bacteriovorus	0	32	0	0	0	0	0	0	19	0	0	0	155	0	0	0	12	0	0	0	0	0	0	0	0	0
ASV_1322	Bacteria	Bacteroidota	Bacteroidia	Cytophagales	MWH-CFBk5	unclassified_MWH-CFBk5	unclassified_MWH-CFBk5	0	0	0	26	0	0	0	0	0	0	0	0	0	0	192	0	0	0	0	0	0	0	0	0	0	0
ASV_1323	Bacteria	Cyanobacteria	Cyanobacteriia	Phormidesmiales	Phormidesmiaceae	Phormidesmis ANT.LACV5.1	unclassified_Phormidesmis ANT.LACV5.1	0	0	0	0	0	0	0	0	0	0	0	0	0	0	218	0	0	0	0	0	0	0	0	0	0	0
ASV_1324	Bacteria	Proteobacteria	Gammaproteobacteria	Burkholderiales	Oxalobacteraceae	unclassified_Oxalobacteraceae	unclassified_Oxalobacteraceae	28	77	0	0	0	0	0	0	0	0	0	0	0	0	0	0	112	0	0	0	0	0	0	0	0	0
ASV_1325	Bacteria	Planctomycetota	Planctomycetes	Planctomycetales	unclassified_Planctomycetales	unclassified_Planctomycetales	unclassified_Planctomycetales	0	40	0	7	0	0	0	0	48	0	0	9	40	10	0	0	63	0	0	0	0	0	0	0	0	0
ASV_1326	Bacteria	Cyanobacteria	Cyanobacteriia	Leptolyngbyales	Leptolyngbyaceae	Leptolyngbya Es-Yyy1000	unclassified_Leptolyngbya Es-Yyy1000	0	0	79	0	0	5	51	61	0	0	0	0	0	0	0	10	0	11	0	0	0	0	0	0	0	0
ASV_1327	Bacteria	Verrucomicrobiota	Verrucomicrobiae	Methylacidiphilales	Methylacidiphilaceae	unclassified_Methylacidiphilaceae	unclassified_Methylacidiphilaceae	0	10	0	0	0	0	0	0	7	0	105	56	0	0	0	0	38	0	0	0	0	0	0	0	0	0
ASV_1328	Bacteria	Planctomycetota	Planctomycetes	Planctomycetales	unclassified_Planctomycetales	unclassified_Planctomycetales	unclassified_Planctomycetales	0	0	10	0	13	31	52	75	0	0	0	0	0	0	0	0	0	33	0	0	0	0	0	0	2	0
ASV_1329	Bacteria	Proteobacteria	Gammaproteobacteria	Burkholderiales	SC-I-84	unclassified_SC-I-84	unclassified_SC-I-84	0	0	0	65	0	0	0	0	0	0	0	0	0	0	0	0	151	0	0	0	0	0	0	0	0	0
ASV_1330	Bacteria	Proteobacteria	Alphaproteobacteria	Rhizobiales	Rhizobiaceae	Mesorhizobium	australicum	0	0	0	0	0	0	0	0	127	0	42	47	0	0	0	0	0	0	0	0	0	0	0	0	0	0
ASV_1331	Bacteria	Myxococcota	Polyangia	Haliangiales	Haliangiaceae	Haliangium	unclassified_Haliangium	0	0	0	0	0	0	0	0	88	19	62	47	0	0	0	0	0	0	0	0	0	0	0	0	0	0
ASV_1332	Bacteria	Acidobacteriota	Vicinamibacteria	Vicinamibacterales	unclassified_Vicinamibacterales	unclassified_Vicinamibacterales	unclassified_Vicinamibacterales	0	0	0	0	0	0	0	0	0	0	0	0	0	0	112	70	34	0	0	0	0	0	0	0	0	0
ASV_1333	Bacteria	Actinobacteriota	Actinobacteria	Frankiales	unclassified_Frankiales	unclassified_Frankiales	unclassified_Frankiales	0	19	0	30	0	0	40	0	0	0	0	0	0	0	0	0	0	0	59	0	0	26	0	0	0	41
ASV_1334	Bacteria	Proteobacteria	Gammaproteobacteria	Burkholderiales	Comamonadaceae	Caenimonas	unclassified_Caenimonas	0	0	32	0	0	0	42	49	0	0	0	0	0	0	49	0	0	43	0	0	0	0	0	0	0	0
ASV_1335	Bacteria	Actinobacteriota	Actinobacteria	Micrococcales	Microbacteriaceae	Frondihabitans	unclassified_Frondihabitans	0	0	0	61	19	18	0	0	117	0	0	0	0	0	0	0	0	0	0	0	0	0	0	0	0	0
ASV_1336	Bacteria	Myxococcota	Polyangia	Polyangiales	Polyangiaceae	Pajaroellobacter	unclassified_Pajaroellobacter	0	0	0	0	0	0	0	0	52	15	41	42	0	0	0	0	65	0	0	0	0	0	0	0	0	0
ASV_1337	Bacteria	Actinobacteriota	Acidimicrobiia	Microtrichales	unclassified_Microtrichales	unclassified_Microtrichales	unclassified_Microtrichales	0	0	0	0	0	0	0	0	3	0	0	45	113	51	0	3	0	0	0	0	0	0	0	0	0	0
ASV_1338	Bacteria	Proteobacteria	Gammaproteobacteria	Xanthomonadales	Xanthomonadaceae	Luteimonas	mephitis	0	0	0	0	0	0	0	0	0	0	0	0	181	34	0	0	0	0	0	0	0	0	0	0	0	0
ASV_1339	Bacteria	Chloroflexi	KD4-96	unclassified_KD4-96	unclassified_KD4-96	unclassified_KD4-96	unclassified_KD4-96	0	0	0	0	0	0	0	0	0	0	0	0	0	0	0	0	0	0	0	98	0	0	28	89	0	0
ASV_1340	Bacteria	Armatimonadota	Fimbriimonadia	Fimbriimonadales	Fimbriimonadaceae	unclassified_Fimbriimonadaceae	unclassified_Fimbriimonadaceae	26	12	0	21	7	8	9	0	0	0	0	0	0	0	41	0	90	0	0	0	0	0	0	0	0	0
ASV_1341	Bacteria	Chloroflexi	Chloroflexia	Thermomicrobiales	JG30-KF-CM45	unclassified_JG30-KF-CM45	unclassified_JG30-KF-CM45	0	0	0	0	0	10	0	0	0	0	0	0	0	0	19	185	0	0	0	0	0	0	0	0	0	0
ASV_1342	Bacteria	Proteobacteria	Gammaproteobacteria	Burkholderiales	Comamonadaceae	Leptothrix	unclassified_Leptothrix	0	0	0	0	0	0	0	0	0	0	179	35	0	0	0	0	0	0	0	0	0	0	0	0	0	0
ASV_1343	Bacteria	Actinobacteriota	Thermoleophilia	Solirubrobacterales	Solirubrobacteraceae	Conexibacter	unclassified_Conexibacter	0	17	0	0	0	0	0	0	0	0	0	10	116	26	0	0	44	0	0	0	0	0	0	0	0	0
ASV_1344	Bacteria	Chloroflexi	Dehalococcoidia	S085	unclassified_S085	unclassified_S085	unclassified_S085	0	0	19	0	0	0	0	18	0	0	0	0	0	0	19	0	0	25	46	0	0	36	0	0	0	50
ASV_1345	Bacteria	Proteobacteria	Alphaproteobacteria	Rhizobiales	Rhizobiales Incertae Sedis	unclassified_Rhizobiales Incertae Sedis	unclassified_Rhizobiales Incertae Sedis	0	0	0	0	0	0	0	0	46	0	63	0	104	0	0	0	0	0	0	0	0	0	0	0	0	0
ASV_1346	Bacteria	Planctomycetota	Planctomycetes	Pirellulales	Pirellulaceae	unclassified_Pirellulaceae	unclassified_Pirellulaceae	0	0	0	0	0	0	0	0	0	0	0	14	181	18	0	0	0	0	0	0	0	0	0	0	0	0
ASV_1347	Bacteria	Actinobacteriota	Thermoleophilia	Solirubrobacterales	67-14	unclassified_67-14	unclassified_67-14	0	0	0	0	0	0	0	0	0	0	0	0	0	0	109	104	0	0	0	0	0	0	0	0	0	0
ASV_1348	Bacteria	Acidobacteriota	Blastocatellia	Blastocatellales	Blastocatellaceae	Blastocatella	unclassified_Blastocatella	0	0	0	0	0	0	0	0	0	0	0	0	0	0	0	0	0	0	0	45	0	0	0	168	0	0
ASV_1349	Bacteria	Chloroflexi	Chloroflexia	Thermobaculales	Thermobaculaceae	Thermobaculum	unclassified_Thermobaculum	0	0	0	0	14	0	24	39	0	0	0	0	0	0	0	0	0	60	0	31	0	0	0	44	0	0
ASV_1350	Bacteria	Chloroflexi	KD4-96	unclassified_KD4-96	unclassified_KD4-96	unclassified_KD4-96	unclassified_KD4-96	0	0	0	0	0	0	0	0	17	0	0	0	0	0	0	0	0	21	95	0	0	0	0	0	18	61
ASV_1351	Bacteria	Proteobacteria	Gammaproteobacteria	Burkholderiales	Comamonadaceae	unclassified_Comamonadaceae	unclassified_Comamonadaceae	0	0	0	0	0	0	0	0	0	0	0	62	85	65	0	0	0	0	0	0	0	0	0	0	0	0
ASV_1352	Bacteria	Verrucomicrobiota	Verrucomicrobiae	Verrucomicrobiales	DEV007	unclassified_DEV007	unclassified_DEV007	0	0	0	0	0	0	0	0	0	0	0	0	0	0	0	0	0	0	10	93	63	0	0	46	0	0
ASV_1353	Bacteria	Chloroflexi	KD4-96	unclassified_KD4-96	unclassified_KD4-96	unclassified_KD4-96	unclassified_KD4-96	0	0	0	0	0	0	0	0	0	0	0	0	0	0	0	0	0	0	0	0	0	0	212	0	0	0
ASV_1354	Bacteria	Bacteroidota	Bacteroidia	Cytophagales	Hymenobacteraceae	Pontibacter	unclassified_Pontibacter	0	0	0	0	0	0	0	0	0	0	0	0	0	0	0	0	0	0	0	0	0	0	0	212	0	0
ASV_1355	Bacteria	Acidobacteriota	Blastocatellia	unclassified_Blastocatellia	unclassified_Blastocatellia	unclassified_Blastocatellia	unclassified_Blastocatellia	16	0	0	0	0	0	0	0	0	0	0	0	0	0	102	0	93	0	0	0	0	0	0	0	0	0
ASV_1356	Bacteria	Planctomycetota	Phycisphaerae	Tepidisphaerales	WD2101 soil group	unclassified_WD2101 soil group	unclassified_WD2101 soil group	0	13	7	112	0	0	0	0	0	0	0	0	0	0	0	0	79	0	0	0	0	0	0	0	0	0
ASV_1357	Bacteria	Proteobacteria	Alphaproteobacteria	Sphingomonadales	Sphingomonadaceae	Polymorphobacter	unclassified_Polymorphobacter	0	0	109	21	0	0	43	11	0	0	0	0	0	0	27	0	0	0	0	0	0	0	0	0	0	0
ASV_1358	Bacteria	Actinobacteriota	Actinobacteria	Kineosporiales	Kineosporiaceae	Quadrisphaera	unclassified_Quadrisphaera	0	0	11	29	43	0	0	40	0	0	0	0	0	0	0	0	0	16	23	0	0	49	0	0	0	0
ASV_1359	Bacteria	Proteobacteria	Alphaproteobacteria	Caulobacterales	Caulobacteraceae	Caulobacter	unclassified_Caulobacter	0	0	0	38	16	0	17	0	0	0	0	0	0	26	41	0	73	0	0	0	0	0	0	0	0	0
ASV_1360	Bacteria	Acidobacteriota	Acidobacteriae	Bryobacterales	Bryobacteraceae	Bryobacter	unclassified_Bryobacter	0	0	0	0	0	0	0	0	134	13	9	55	0	0	0	0	0	0	0	0	0	0	0	0	0	0
ASV_1361	Bacteria	Gemmatimonadota	Gemmatimonadetes	Gemmatimonadales	Gemmatimonadaceae	unclassified_Gemmatimonadaceae	unclassified_Gemmatimonadaceae	0	0	0	0	0	0	0	0	0	0	0	0	50	86	35	0	0	0	0	0	0	40	0	0	0	0
ASV_1362	Bacteria	Proteobacteria	Alphaproteobacteria	Tistrellales	Geminicoccaceae	unclassified_Geminicoccaceae	unclassified_Geminicoccaceae	0	0	0	0	0	0	0	0	0	0	0	0	0	0	0	0	0	0	0	0	94	4	97	16	0	0
ASV_1363	Bacteria	Bacteroidota	Bacteroidia	Flavobacteriales	Flavobacteriaceae	Flavobacterium	unclassified_Flavobacterium	23	20	0	0	54	19	39	30	0	0	0	0	0	0	0	18	0	7	0	0	0	0	0	0	0	0
ASV_1364	Bacteria	Chloroflexi	Chloroflexia	Kallotenuales	AKIW781	unclassified_AKIW781	unclassified_AKIW781	0	0	51	0	0	0	97	44	0	0	0	0	0	0	0	0	0	18	0	0	0	0	0	0	0	0
ASV_1365	Bacteria	Proteobacteria	Alphaproteobacteria	Acetobacterales	Acetobacteraceae	unclassified_Acetobacteraceae	unclassified_Acetobacteraceae	0	0	47	0	0	12	15	0	0	0	0	0	0	0	0	72	0	15	0	0	0	49	0	0	0	0
ASV_1366	Bacteria	Proteobacteria	Alphaproteobacteria	Tistrellales	Geminicoccaceae	Candidatus Alysiosphaera	unclassified_Candidatus Alysiosphaera	0	0	0	0	10	7	0	36	0	0	0	0	0	0	23	0	0	58	50	0	0	0	0	26	0	0
ASV_1367	Bacteria	Nitrospirota	Nitrospiria	Nitrospirales	Nitrospiraceae	Nitrospira	bacterium	0	0	0	0	0	0	0	94	0	0	0	0	0	0	0	0	0	77	25	0	0	0	0	14	0	0
ASV_1368	Bacteria	Bacteroidota	Bacteroidia	Chitinophagales	Chitinophagaceae	Flavitalea	unclassified_Flavitalea	0	0	0	0	0	0	0	0	0	0	0	0	210	0	0	0	0	0	0	0	0	0	0	0	0	0
ASV_1369	Bacteria	Actinobacteriota	Actinobacteria	Propionibacteriales	Nocardioidaceae	Nocardioides	unclassified_Nocardioides	0	0	0	0	0	0	0	0	0	0	0	0	0	0	0	210	0	0	0	0	0	0	0	0	0	0
ASV_1371	Bacteria	Proteobacteria	Alphaproteobacteria	Rhizobiales	Rhodomicrobiaceae	Rhodomicrobium	unclassified_Rhodomicrobium	0	0	20	0	0	0	8	13	0	0	0	0	0	0	0	0	0	56	0	0	0	112	0	0	0	0
ASV_1372	Bacteria	Actinobacteriota	Actinobacteria	Kineosporiales	Kineosporiaceae	Quadrisphaera	unclassified_Quadrisphaera	0	0	0	0	64	29	68	0	0	0	0	0	0	0	32	16	0	0	0	0	0	0	0	0	0	0
ASV_1373	Bacteria	Actinobacteriota	Actinobacteria	Propionibacteriales	Nocardioidaceae	Kribbella	unclassified_Kribbella	0	0	0	0	0	0	0	0	0	0	0	0	0	0	0	125	0	52	0	0	0	32	0	0	0	0
ASV_1374	Bacteria	Proteobacteria	Alphaproteobacteria	unclassified_Alphaproteobacteria	unclassified_Alphaproteobacteria	unclassified_Alphaproteobacteria	unclassified_Alphaproteobacteria	0	0	0	0	0	0	0	0	0	0	0	0	0	0	0	0	0	0	0	0	0	0	209	0	0	0
ASV_1375	Bacteria	Patescibacteria	Microgenomatia	Candidatus Woesebacteria	unclassified_Candidatus Woesebacteria	unclassified_Candidatus Woesebacteria	unclassified_Candidatus Woesebacteria	0	0	0	7	0	0	0	0	115	11	14	46	15	0	0	0	0	0	0	0	0	0	0	0	0	0
ASV_1376	Bacteria	Proteobacteria	Gammaproteobacteria	Burkholderiales	Comamonadaceae	unclassified_Comamonadaceae	unclassified_Comamonadaceae	0	0	0	0	0	0	0	0	0	0	0	0	0	0	208	0	0	0	0	0	0	0	0	0	0	0
ASV_1377	Bacteria	Verrucomicrobiota	Verrucomicrobiae	Chthoniobacterales	Chthoniobacteraceae	Candidatus Udaeobacter	unclassified_Candidatus Udaeobacter	0	0	0	0	0	0	0	0	0	0	0	0	0	0	0	0	0	208	0	0	0	0	0	0	0	0
ASV_1379	Bacteria	Acidobacteriota	Blastocatellia	Blastocatellales	Blastocatellaceae	Blastocatella	unclassified_Blastocatella	21	0	0	0	0	0	0	0	0	0	0	0	0	0	0	0	186	0	0	0	0	0	0	0	0	0
ASV_1380	Bacteria	Verrucomicrobiota	Verrucomicrobiae	Chthoniobacterales	Chthoniobacteraceae	Chthoniobacter	unclassified_Chthoniobacter	0	156	0	0	0	0	0	0	0	0	0	0	0	0	0	0	51	0	0	0	0	0	0	0	0	0
ASV_1381	Bacteria	Gemmatimonadota	Gemmatimonadetes	Gemmatimonadales	Gemmatimonadaceae	Gemmatimonas	unclassified_Gemmatimonas	0	16	0	0	0	0	0	0	98	0	24	15	0	0	54	0	0	0	0	0	0	0	0	0	0	0
ASV_1382	Bacteria	Dependentiae	Babeliae	Babeliales	Babeliaceae	unclassified_Babeliaceae	unclassified_Babeliaceae	0	10	0	65	0	0	20	8	4	0	0	0	0	0	0	28	62	2	0	0	0	0	0	0	0	8
ASV_1383	Bacteria	Actinobacteriota	Actinobacteria	Propionibacteriales	Nocardioidaceae	Nocardioides	unclassified_Nocardioides	0	0	0	207	0	0	0	0	0	0	0	0	0	0	0	0	0	0	0	0	0	0	0	0	0	0
ASV_1384	Bacteria	Actinobacteriota	Acidimicrobiia	Microtrichales	Iamiaceae	Iamia	unclassified_Iamia	0	0	0	0	38	0	57	64	0	0	0	0	0	0	0	0	0	32	0	0	0	0	0	0	16	0
ASV_1385	Bacteria	Planctomycetota	Phycisphaerae	Tepidisphaerales	WD2101 soil group	unclassified_WD2101 soil group	unclassified_WD2101 soil group	0	0	0	0	11	0	88	30	0	0	0	0	0	0	0	0	0	0	0	35	0	0	0	43	0	0
ASV_1386	Bacteria	Proteobacteria	Gammaproteobacteria	Xanthomonadales	Xanthomonadaceae	Luteimonas	unclassified_Luteimonas	0	0	0	0	0	0	0	12	0	0	0	0	26	0	30	0	0	0	120	0	0	19	0	0	0	0
ASV_1388	Bacteria	Gemmatimonadota	Longimicrobia	Longimicrobiales	Longimicrobiaceae	unclassified_Longimicrobiaceae	unclassified_Longimicrobiaceae	0	0	0	0	0	0	0	0	0	0	0	0	0	0	0	0	0	0	0	0	75	0	132	0	0	0
ASV_1389	Bacteria	Bacteroidota	Bacteroidia	Chitinophagales	Chitinophagaceae	Segetibacter	unclassified_Segetibacter	3	0	0	0	39	10	31	4	0	0	0	0	0	0	114	0	0	5	0	0	0	0	0	0	0	0
ASV_1390	Bacteria	Acidobacteriota	Acidobacteriae	Bryobacterales	Bryobacteraceae	Bryobacter	unclassified_Bryobacter	0	0	11	0	60	19	16	66	0	0	0	0	0	0	0	0	0	18	8	0	0	5	0	0	3	0
ASV_1391	Bacteria	Chloroflexi	Anaerolineae	SBR1031	A4b	unclassified_A4b	unclassified_A4b	0	0	0	0	0	0	0	0	117	8	27	43	11	0	0	0	0	0	0	0	0	0	0	0	0	0
ASV_1392	Bacteria	Proteobacteria	Gammaproteobacteria	Burkholderiales	SC-I-84	unclassified_SC-I-84	unclassified_SC-I-84	0	0	0	0	0	0	0	0	0	0	0	0	122	19	0	0	0	0	0	0	0	0	0	0	0	65
ASV_1393	Bacteria	Bacteroidota	Bacteroidia	Chitinophagales	Chitinophagaceae	unclassified_Chitinophagaceae	unclassified_Chitinophagaceae	0	0	0	0	0	0	0	0	0	0	0	0	0	0	0	0	206	0	0	0	0	0	0	0	0	0
ASV_1394	Bacteria	Chloroflexi	Anaerolineae	Caldilineales	Caldilineaceae	unclassified_Caldilineaceae	unclassified_Caldilineaceae	33	13	57	0	9	0	9	22	0	0	0	0	0	0	11	0	36	12	0	0	0	0	0	0	3	0
ASV_1395	Bacteria	Planctomycetota	Planctomycetes	Gemmatales	Gemmataceae	unclassified_Gemmataceae	unclassified_Gemmataceae	0	0	0	0	28	0	17	25	0	0	0	0	0	0	36	38	0	0	11	0	0	42	0	0	0	8
ASV_1396	Bacteria	Actinobacteriota	Thermoleophilia	Solirubrobacterales	67-14	unclassified_67-14	unclassified_67-14	0	0	0	0	0	0	0	0	0	0	0	0	0	0	90	0	0	0	115	0	0	0	0	0	0	0
ASV_1397	Bacteria	Gemmatimonadota	Gemmatimonadetes	Gemmatimonadales	Gemmatimonadaceae	Gemmatimonas	unclassified_Gemmatimonas	0	8	0	0	0	0	0	0	151	15	14	16	0	0	0	0	0	0	0	0	0	0	0	0	0	0
ASV_1398	Bacteria	Verrucomicrobiota	Verrucomicrobiae	Chthoniobacterales	Chthoniobacteraceae	Candidatus Udaeobacter	unclassified_Candidatus Udaeobacter	0	0	0	0	0	0	0	0	0	0	0	0	0	0	0	0	0	0	0	22	0	0	0	182	0	0
ASV_1399	Bacteria	Gemmatimonadota	Gemmatimonadetes	Gemmatimonadales	Gemmatimonadaceae	Gemmatimonas	unclassified_Gemmatimonas	38	15	37	37	0	0	37	0	0	0	0	0	0	0	0	0	39	0	0	0	0	0	0	0	0	0
ASV_1400	Bacteria	Proteobacteria	Alphaproteobacteria	Caulobacterales	Hyphomonadaceae	Hirschia	unclassified_Hirschia	0	0	11	0	0	0	0	0	22	0	0	118	0	23	0	0	29	0	0	0	0	0	0	0	0	0
ASV_1401	Bacteria	Bacteroidota	Bacteroidia	Cytophagales	Hymenobacteraceae	Hymenobacter	unclassified_Hymenobacter	0	0	0	25	0	0	0	0	0	0	0	0	0	0	80	0	0	0	82	12	4	0	0	0	0	0
ASV_1402	Bacteria	Verrucomicrobiota	Verrucomicrobiae	Pedosphaerales	Pedosphaeraceae	unclassified_Pedosphaeraceae	unclassified_Pedosphaeraceae	0	0	0	0	0	0	0	0	0	0	0	0	0	0	0	0	0	0	0	56	104	0	43	0	0	0
ASV_1403	Bacteria	Nitrospirota	Nitrospiria	Nitrospirales	Nitrospiraceae	Nitrospira	unclassified_Nitrospira	36	0	0	0	0	0	0	10	0	0	0	5	86	65	0	0	0	0	0	0	0	0	0	0	0	0
ASV_1404	Bacteria	Proteobacteria	Alphaproteobacteria	Rhodobacterales	Rhodobacteraceae	Rubellimicrobium	unclassified_Rubellimicrobium	35	8	39	37	18	0	29	0	0	0	0	0	4	0	9	0	23	0	0	0	0	0	0	0	0	0
ASV_1405	Bacteria	Chloroflexi	Chloroflexia	Thermomicrobiales	JG30-KF-CM45	unclassified_JG30-KF-CM45	unclassified_JG30-KF-CM45	23	0	61	0	0	22	50	8	0	0	0	0	0	0	26	0	0	12	0	0	0	0	0	0	0	0
ASV_1406	Bacteria	Proteobacteria	Gammaproteobacteria	Burkholderiales	Burkholderiaceae	Burkholderia-Caballeronia-Paraburkholderia	unclassified_Burkholderia-Caballeronia-Paraburkholderia	0	0	0	0	0	0	0	0	54	0	0	0	0	0	0	13	0	0	0	0	0	0	23	0	16	96
ASV_1407	Bacteria	Bdellovibrionota	Bdellovibrionia	Bacteriovoracales	Bacteriovoracaceae	Bacteriovorax	unclassified_Bacteriovorax	0	0	0	0	0	0	0	0	0	0	0	57	36	109	0	0	0	0	0	0	0	0	0	0	0	0
ASV_1408	Bacteria	Proteobacteria	Gammaproteobacteria	Burkholderiales	Nitrosomonadaceae	Ellin6067	unclassified_Ellin6067	0	0	0	0	0	0	0	0	0	0	0	0	202	0	0	0	0	0	0	0	0	0	0	0	0	0
ASV_1409	Bacteria	Actinobacteriota	Thermoleophilia	Solirubrobacterales	Solirubrobacteraceae	Conexibacter	unclassified_Conexibacter	0	0	0	0	0	0	0	0	0	0	0	0	0	0	0	0	0	0	0	0	0	0	202	0	0	0
ASV_1410	Bacteria	Bacteroidota	Bacteroidia	Cytophagales	unclassified_Cytophagales	unclassified_Cytophagales	unclassified_Cytophagales	69	25	3	9	0	0	8	0	0	0	0	0	0	0	0	0	4	7	11	0	65	0	0	0	0	0
ASV_1411	Bacteria	Bacteroidota	Bacteroidia	Sphingobacteriales	env.OPS 17	unclassified_env.OPS 17	unclassified_env.OPS 17	29	0	33	0	0	13	0	0	0	0	0	27	13	15	0	0	71	0	0	0	0	0	0	0	0	0
ASV_1412	Bacteria	Bacteroidota	Bacteroidia	Cytophagales	Spirosomaceae	Spirosoma	unclassified_Spirosoma	23	0	0	137	11	22	0	0	0	0	0	0	0	0	0	0	8	0	0	0	0	0	0	0	0	0
ASV_1413	Bacteria	Bacteroidota	Ignavibacteria	SJA-28	unclassified_SJA-28	unclassified_SJA-28	unclassified_SJA-28	0	7	0	0	0	0	0	0	0	5	0	19	135	19	0	0	16	0	0	0	0	0	0	0	0	0
ASV_1414	Bacteria	Actinobacteriota	Acidimicrobiia	Microtrichales	Iamiaceae	Iamia	majanohamensis	0	0	0	0	0	0	8	0	0	0	0	0	0	0	0	0	0	0	0	0	0	20	13	160	0	0
ASV_1415	Bacteria	Actinobacteriota	Thermoleophilia	Solirubrobacterales	67-14	unclassified_67-14	unclassified_67-14	0	0	0	0	0	0	0	0	0	0	0	6	8	0	0	0	0	0	96	0	0	91	0	0	0	0
ASV_1416	Bacteria	Acidobacteriota	Blastocatellia	Pyrinomonadales	Pyrinomonadaceae	RB41	unclassified_RB41	4	0	0	0	0	23	0	81	0	0	0	0	0	0	0	92	0	0	0	0	0	0	0	0	0	0
ASV_1417	Bacteria	Planctomycetota	Phycisphaerae	Tepidisphaerales	WD2101 soil group	unclassified_WD2101 soil group	unclassified_WD2101 soil group	0	19	0	0	0	0	0	0	0	0	20	61	8	0	0	0	92	0	0	0	0	0	0	0	0	0
ASV_1418	Bacteria	Bacteroidota	Bacteroidia	Cytophagales	Spirosomaceae	Persicitalea	unclassified_Persicitalea	0	0	0	0	82	20	66	0	0	0	0	0	0	0	13	0	0	19	0	0	0	0	0	0	0	0
ASV_1419	Bacteria	Myxococcota	Polyangia	Nannocystales	Nannocystaceae	Nannocystis	unclassified_Nannocystis	0	0	0	0	0	0	17	94	0	0	0	0	0	0	0	0	0	4	18	0	0	67	0	0	0	0
ASV_1420	Bacteria	Actinobacteriota	Actinobacteria	Micrococcales	Microbacteriaceae	Parafrigoribacterium	unclassified_Parafrigoribacterium	0	0	0	0	0	0	0	0	0	0	81	119	0	0	0	0	0	0	0	0	0	0	0	0	0	0
ASV_1421	Bacteria	Actinobacteriota	Thermoleophilia	Solirubrobacterales	67-14	unclassified_67-14	unclassified_67-14	0	0	0	0	0	0	0	0	0	0	0	0	0	0	7	111	0	0	0	0	0	82	0	0	0	0
ASV_1422	Bacteria	Acidobacteriota	Acidobacteriae	Bryobacterales	Bryobacteraceae	Bryobacter	unclassified_Bryobacter	0	0	0	0	0	0	0	0	0	0	0	0	0	0	0	200	0	0	0	0	0	0	0	0	0	0
ASV_1423	Bacteria	Acidobacteriota	Vicinamibacteria	Vicinamibacterales	Vicinamibacteraceae	unclassified_Vicinamibacteraceae	unclassified_Vicinamibacteraceae	0	0	0	0	0	0	0	0	0	0	0	0	0	0	0	0	0	200	0	0	0	0	0	0	0	0
ASV_1424	Bacteria	Myxococcota	Polyangia	Blfdi19	unclassified_Blfdi19	unclassified_Blfdi19	unclassified_Blfdi19	0	0	0	0	0	0	0	0	0	0	0	0	0	0	0	0	0	0	0	0	49	0	151	0	0	0
ASV_1425	Bacteria	Abditibacteriota	Abditibacteria	Abditibacteriales	Abditibacteriaceae	Abditibacterium	utsteinense	12	0	25	112	0	0	17	0	0	0	0	0	20	0	0	0	13	0	0	0	0	0	0	0	0	0
ASV_1426	Bacteria	Planctomycetota	Planctomycetes	Gemmatales	Gemmataceae	Gemmata	unclassified_Gemmata	0	14	0	10	17	0	7	6	0	0	4	24	21	12	23	10	51	0	0	0	0	0	0	0	0	0
ASV_1427	Bacteria	Actinobacteriota	Thermoleophilia	Gaiellales	Gaiellaceae	Gaiella	unclassified_Gaiella	0	0	0	0	0	0	0	0	0	0	0	0	139	60	0	0	0	0	0	0	0	0	0	0	0	0
ASV_1428	Bacteria	Actinobacteriota	Acidimicrobiia	Microtrichales	unclassified_Microtrichales	unclassified_Microtrichales	unclassified_Microtrichales	0	0	0	0	0	0	0	0	0	0	0	0	0	0	120	0	0	0	25	0	0	54	0	0	0	0
ASV_1429	Bacteria	Acidobacteriota	Vicinamibacteria	Vicinamibacterales	unclassified_Vicinamibacterales	unclassified_Vicinamibacterales	unclassified_Vicinamibacterales	0	0	0	0	0	0	0	0	0	0	0	0	0	0	0	38	0	33	11	0	0	85	0	0	0	32
ASV_1430	Bacteria	Desulfobacterota	Desulfuromonadia	Bradymonadales	Bradymonadaceae	unclassified_Bradymonadaceae	unclassified_Bradymonadaceae	0	0	0	0	0	0	0	0	0	0	0	0	0	0	0	0	0	0	0	38	29	0	132	0	0	0
ASV_1431	Bacteria	Verrucomicrobiota	Verrucomicrobiae	Pedosphaerales	Pedosphaeraceae	unclassified_Pedosphaeraceae	unclassified_Pedosphaeraceae	0	0	0	0	0	0	0	0	0	0	0	0	0	0	0	0	0	0	0	0	0	149	0	0	0	50
ASV_1432	Bacteria	Bacteroidota	Bacteroidia	Chitinophagales	Chitinophagaceae	Edaphobaculum	unclassified_Edaphobaculum	55	0	0	0	18	0	24	0	0	0	0	0	0	0	14	0	12	16	34	17	8	0	0	0	0	0
ASV_1433	Bacteria	Patescibacteria	Microgenomatia	unclassified_Microgenomatia	unclassified_Microgenomatia	unclassified_Microgenomatia	unclassified_Microgenomatia	27	69	0	4	2	0	0	0	35	0	5	14	0	0	0	0	42	0	0	0	0	0	0	0	0	0
ASV_1434	Bacteria	Bacteroidota	Bacteroidia	Cytophagales	Hymenobacteraceae	Hymenobacter	unclassified_Hymenobacter	19	0	0	0	88	0	90	0	0	0	0	0	0	0	0	0	0	0	0	0	0	0	0	0	0	0
ASV_1435	Bacteria	Bacteroidota	Bacteroidia	Sphingobacteriales	AKYH767	unclassified_AKYH767	unclassified_AKYH767	0	0	0	13	0	0	0	0	0	0	0	0	0	0	0	184	0	0	0	0	0	0	0	0	0	0
ASV_1436	Bacteria	Proteobacteria	Alphaproteobacteria	Sphingomonadales	Sphingomonadaceae	Ellin6055	unclassified_Ellin6055	0	0	0	0	0	0	38	0	0	0	0	0	0	0	16	0	0	22	0	59	3	0	0	58	0	0
ASV_1437	Bacteria	Proteobacteria	Alphaproteobacteria	Caulobacterales	Caulobacteraceae	unclassified_Caulobacteraceae	unclassified_Caulobacteraceae	0	0	0	0	0	0	0	0	145	16	0	35	0	0	0	0	0	0	0	0	0	0	0	0	0	0
ASV_1438	Bacteria	Proteobacteria	Gammaproteobacteria	Legionellales	Legionellaceae	Legionella	unclassified_Legionella	0	0	0	0	0	0	0	0	0	0	0	0	0	0	0	0	0	0	0	0	0	0	196	0	0	0
ASV_1439	Bacteria	Chloroflexi	KD4-96	unclassified_KD4-96	unclassified_KD4-96	unclassified_KD4-96	unclassified_KD4-96	0	0	0	0	0	0	0	0	0	0	0	0	0	0	0	0	0	0	0	0	0	0	196	0	0	0
ASV_1440	Bacteria	Actinobacteriota	Actinobacteria	Propionibacteriales	Nocardioidaceae	Nocardioides	unclassified_Nocardioides	0	0	0	57	0	0	0	0	0	0	0	0	0	0	0	0	138	0	0	0	0	0	0	0	0	0
ASV_1441	Bacteria	Bacteroidota	Bacteroidia	Flavobacteriales	Cryomorphaceae	Cryomorpha	unclassified_Cryomorpha	0	0	0	6	0	0	0	0	0	0	0	0	0	0	0	0	0	0	17	0	172	0	0	0	0	0
ASV_1442	Bacteria	Bacteroidota	Ignavibacteria	SJA-28	unclassified_SJA-28	unclassified_SJA-28	unclassified_SJA-28	0	0	0	0	0	0	0	32	0	0	0	0	0	0	51	0	0	97	0	0	0	15	0	0	0	0
ASV_1443	Bacteria	Myxococcota	Polyangia	Polyangiales	Polyangiaceae	Pajaroellobacter	unclassified_Pajaroellobacter	0	0	0	0	0	0	0	0	183	0	12	0	0	0	0	0	0	0	0	0	0	0	0	0	0	0
ASV_1444	Bacteria	Planctomycetota	Phycisphaerae	Tepidisphaerales	WD2101 soil group	unclassified_WD2101 soil group	unclassified_WD2101 soil group	0	0	0	0	27	0	15	16	0	0	0	23	15	28	11	12	0	0	4	0	0	0	0	0	0	43
ASV_1445	Bacteria	Actinobacteriota	Actinobacteria	Corynebacteriales	Mycobacteriaceae	Mycobacterium	unclassified_Mycobacterium	0	0	0	0	0	0	0	0	124	0	0	70	0	0	0	0	0	0	0	0	0	0	0	0	0	0
ASV_1446	Bacteria	Verrucomicrobiota	Verrucomicrobiae	Chthoniobacterales	Chthoniobacteraceae	Candidatus Udaeobacter	unclassified_Candidatus Udaeobacter	0	0	0	0	0	0	0	0	0	0	0	0	0	0	0	0	0	194	0	0	0	0	0	0	0	0
ASV_1447	Bacteria	Bacteroidota	Bacteroidia	Cytophagales	unclassified_Cytophagales	unclassified_Cytophagales	unclassified_Cytophagales	7	8	74	14	8	0	39	0	0	0	0	0	0	0	36	7	0	0	0	0	0	0	0	0	0	0
ASV_1448	Archaea	Nanoarchaeota	Nanoarchaeia	Woesearchaeales	unclassified_Woesearchaeales	unclassified_Woesearchaeales	unclassified_Woesearchaeales	0	0	0	0	0	0	0	0	0	0	0	193	0	0	0	0	0	0	0	0	0	0	0	0	0	0
ASV_1449	Bacteria	Verrucomicrobiota	Chlamydiae	Chlamydiales	Parachlamydiaceae	Candidatus Protochlamydia	unclassified_Candidatus Protochlamydia	0	0	0	0	0	0	0	0	0	0	0	0	193	0	0	0	0	0	0	0	0	0	0	0	0	0
ASV_1450	Bacteria	Actinobacteriota	Thermoleophilia	Solirubrobacterales	67-14	unclassified_67-14	unclassified_67-14	28	0	0	25	0	0	0	0	18	0	0	26	11	0	0	0	84	0	0	0	0	0	0	0	0	0
ASV_1451	Bacteria	Planctomycetota	Planctomycetes	Planctomycetales	unclassified_Planctomycetales	unclassified_Planctomycetales	unclassified_Planctomycetales	0	0	20	0	17	0	23	23	0	0	0	0	0	0	33	27	0	8	8	13	11	9	0	0	0	0
ASV_1452	Bacteria	Chloroflexi	KD4-96	unclassified_KD4-96	unclassified_KD4-96	unclassified_KD4-96	unclassified_KD4-96	0	0	0	0	34	0	13	0	17	0	0	0	7	0	17	0	0	18	13	0	0	40	0	0	0	33
ASV_1453	Bacteria	Myxococcota	bacteriap25	unclassified_bacteriap25	unclassified_bacteriap25	unclassified_bacteriap25	unclassified_bacteriap25	0	0	0	0	0	0	0	0	2	0	0	0	0	0	16	0	0	7	13	0	0	0	0	0	9	145
ASV_1454	Bacteria	Bacteroidota	Bacteroidia	Chitinophagales	Chitinophagaceae	Segetibacter	unclassified_Segetibacter	0	0	0	0	0	0	0	0	0	0	0	0	0	0	192	0	0	0	0	0	0	0	0	0	0	0
ASV_1455	Bacteria	Bacteroidota	Bacteroidia	Cytophagales	Cyclobacteriaceae	Echinicola	vietnamensis	0	0	0	0	0	0	0	0	0	0	0	0	0	0	164	0	0	0	11	17	0	0	0	0	0	0
ASV_1456	Bacteria	Chloroflexi	Chloroflexia	Thermomicrobiales	JG30-KF-CM45	unclassified_JG30-KF-CM45	unclassified_JG30-KF-CM45	0	0	0	0	0	0	0	0	0	0	0	0	0	0	0	0	0	0	0	93	0	0	0	99	0	0
ASV_1457	Bacteria	Verrucomicrobiota	Verrucomicrobiae	Pedosphaerales	Pedosphaeraceae	unclassified_Pedosphaeraceae	unclassified_Pedosphaeraceae	0	0	22	0	0	0	27	55	0	0	0	0	0	0	0	0	0	0	13	0	0	0	0	0	0	74
ASV_1458	Bacteria	Actinobacteriota	Thermoleophilia	Solirubrobacterales	67-14	unclassified_67-14	unclassified_67-14	0	0	0	0	0	0	0	0	0	0	0	0	43	0	0	97	0	0	0	11	0	40	0	0	0	0
ASV_1459	Bacteria	Actinobacteriota	Thermoleophilia	Gaiellales	unclassified_Gaiellales	unclassified_Gaiellales	unclassified_Gaiellales	0	0	0	0	0	0	0	0	0	0	0	0	16	0	0	0	0	0	43	0	0	46	0	0	0	86
ASV_1460	Bacteria	Acidobacteriota	Acidobacteriae	Solibacterales	Solibacteraceae	Candidatus Solibacter	unclassified_Candidatus Solibacter	31	0	0	0	15	0	34	0	0	0	0	0	0	0	0	30	70	0	0	0	0	10	0	0	0	0
ASV_1461	Bacteria	Bacteroidota	Bacteroidia	Flavobacteriales	Flavobacteriaceae	Flavobacterium	unclassified_Flavobacterium	24	0	57	0	0	31	0	0	0	0	0	43	20	0	0	0	15	0	0	0	0	0	0	0	0	0
ASV_1462	Bacteria	Myxococcota	Polyangia	VHS-B3-70	unclassified_VHS-B3-70	unclassified_VHS-B3-70	unclassified_VHS-B3-70	0	33	10	0	28	8	0	0	41	6	0	17	18	0	0	0	17	0	0	0	0	0	0	0	0	12
ASV_1463	Bacteria	Bacteroidota	Bacteroidia	Flavobacteriales	Flavobacteriaceae	Flavobacterium	unclassified_Flavobacterium	0	0	146	0	44	0	0	0	0	0	0	0	0	0	0	0	0	0	0	0	0	0	0	0	0	0
ASV_1464	Bacteria	Proteobacteria	Alphaproteobacteria	Rhizobiales	Hyphomicrobiaceae	Pedomicrobium	unclassified_Pedomicrobium	0	0	0	0	16	0	6	0	0	0	0	0	0	0	5	0	0	14	29	9	0	28	0	0	0	83
ASV_1465	Bacteria	Actinobacteriota	Actinobacteria	Micrococcales	Microbacteriaceae	Parafrigoribacterium	unclassified_Parafrigoribacterium	0	0	0	0	0	0	0	0	190	0	0	0	0	0	0	0	0	0	0	0	0	0	0	0	0	0
ASV_1466	Bacteria	Verrucomicrobiota	Verrucomicrobiae	Opitutales	Opitutaceae	Opitutus	unclassified_Opitutus	0	0	0	0	0	0	0	0	78	16	15	44	0	0	0	0	37	0	0	0	0	0	0	0	0	0
ASV_1467	Bacteria	Acidobacteriota	Vicinamibacteria	Vicinamibacterales	unclassified_Vicinamibacterales	unclassified_Vicinamibacterales	unclassified_Vicinamibacterales	0	0	0	0	0	0	0	0	0	0	0	0	0	0	0	17	0	0	0	0	0	75	0	0	0	98
ASV_1468	Bacteria	Verrucomicrobiota	Verrucomicrobiae	Pedosphaerales	Pedosphaeraceae	unclassified_Pedosphaeraceae	unclassified_Pedosphaeraceae	0	0	0	0	0	0	0	0	0	0	0	0	0	0	0	0	0	0	0	0	0	0	0	0	11	179
ASV_1469	Bacteria	Chloroflexi	Chloroflexia	Chloroflexales	Herpetosiphonaceae	Herpetosiphon	unclassified_Herpetosiphon	0	9	46	0	4	0	47	34	0	0	0	0	0	0	0	0	0	15	10	0	0	24	0	0	0	0
ASV_1470	Bacteria	Planctomycetota	Phycisphaerae	Tepidisphaerales	WD2101 soil group	unclassified_WD2101 soil group	unclassified_WD2101 soil group	0	0	13	73	16	0	0	0	0	0	0	0	0	0	0	36	51	0	0	0	0	0	0	0	0	0
ASV_1471	Bacteria	Actinobacteriota	Actinobacteria	Frankiales	unclassified_Frankiales	unclassified_Frankiales	unclassified_Frankiales	0	0	0	107	0	0	0	0	0	0	0	0	0	0	0	0	0	0	0	82	0	0	0	0	0	0
ASV_1472	Bacteria	Actinobacteriota	Thermoleophilia	Solirubrobacterales	Solirubrobacteraceae	Conexibacter	unclassified_Conexibacter	0	0	0	0	0	0	0	0	0	0	0	0	0	0	48	95	0	46	0	0	0	0	0	0	0	0
ASV_1473	Bacteria	Actinobacteriota	Acidimicrobiia	Actinomarinales	unclassified_Actinomarinales	unclassified_Actinomarinales	unclassified_Actinomarinales	0	0	0	0	0	0	0	0	0	0	0	0	0	0	0	0	0	0	0	0	157	0	32	0	0	0
ASV_1474	Bacteria	Gemmatimonadota	Gemmatimonadetes	Gemmatimonadales	Gemmatimonadaceae	unclassified_Gemmatimonadaceae	unclassified_Gemmatimonadaceae	0	0	0	0	0	0	0	0	0	0	0	0	0	0	0	0	0	0	0	0	0	189	0	0	0	0
ASV_1475	Bacteria	Verrucomicrobiota	Verrucomicrobiae	Chthoniobacterales	Chthoniobacteraceae	Chthoniobacter	unclassified_Chthoniobacter	6	0	0	0	95	0	39	34	0	0	0	0	0	0	0	0	0	14	0	0	0	0	0	0	0	0
ASV_1476	Bacteria	unclassified_Bacteria	unclassified_Bacteria	unclassified_Bacteria	unclassified_Bacteria	unclassified_Bacteria	unclassified_Bacteria	5	0	5	0	11	0	0	0	0	3	139	7	11	0	0	0	4	0	0	0	0	0	0	0	3	0
ASV_1477	Bacteria	Cyanobacteria	Cyanobacteriia	Cyanobacteriales	Oscillatoriaceae	Oscillatoria PCC-6304	unclassified_Oscillatoria PCC-6304	0	0	176	0	0	0	0	0	0	0	0	0	0	0	0	0	0	0	0	0	0	0	0	0	12	0
ASV_1478	Bacteria	Bacteroidota	Bacteroidia	Chitinophagales	Chitinophagaceae	Segetibacter	unclassified_Segetibacter	0	0	10	0	0	0	40	0	0	0	0	0	0	0	0	0	0	0	85	0	0	0	0	53	0	0
ASV_1479	Bacteria	Proteobacteria	Alphaproteobacteria	Rhizobiales	Rhizobiales Incertae Sedis	Nordella	unclassified_Nordella	0	0	0	0	0	0	0	0	24	76	0	88	0	0	0	0	0	0	0	0	0	0	0	0	0	0
ASV_1480	Bacteria	Actinobacteriota	Actinobacteria	Frankiales	unclassified_Frankiales	unclassified_Frankiales	unclassified_Frankiales	0	0	0	0	17	24	27	40	0	0	0	0	0	0	29	0	0	36	14	0	0	0	0	0	0	0
ASV_1481	Bacteria	Actinobacteriota	Actinobacteria	Nitriliruptorales	Nitriliruptoraceae	Nitriliruptor	unclassified_Nitriliruptor	0	0	0	0	0	0	0	0	0	0	0	0	0	0	0	0	0	0	0	0	0	0	187	0	0	0
ASV_1482	Bacteria	Proteobacteria	Alphaproteobacteria	Rhizobiales	Beijerinckiaceae	Methylorosula	unclassified_Methylorosula	28	26	0	60	30	25	0	0	0	0	0	0	0	0	0	0	17	0	0	0	0	0	0	0	0	0
ASV_1483	Bacteria	Proteobacteria	Gammaproteobacteria	Xanthomonadales	Xanthomonadaceae	Thermomonas	unclassified_Thermomonas	0	81	0	0	0	0	0	0	0	0	0	0	0	0	0	0	105	0	0	0	0	0	0	0	0	0
ASV_1484	Bacteria	Actinobacteriota	Acidimicrobiia	Microtrichales	Ilumatobacteraceae	Ilumatobacter	unclassified_Ilumatobacter	0	10	10	0	0	0	16	0	0	0	0	0	0	0	22	0	10	0	60	33	0	0	0	25	0	0
ASV_1485	Bacteria	Actinobacteriota	Thermoleophilia	Solirubrobacterales	67-14	unclassified_67-14	unclassified_67-14	0	0	33	0	0	14	0	74	29	0	0	0	0	0	0	13	23	0	0	0	0	0	0	0	0	0
ASV_1486	Bacteria	Verrucomicrobiota	Verrucomicrobiae	Verrucomicrobiales	Verrucomicrobiaceae	Verrucomicrobium	unclassified_Verrucomicrobium	0	0	0	25	0	0	0	0	11	0	0	50	0	0	0	0	100	0	0	0	0	0	0	0	0	0
ASV_1487	Bacteria	Planctomycetota	Phycisphaerae	Tepidisphaerales	WD2101 soil group	unclassified_WD2101 soil group	unclassified_WD2101 soil group	0	0	0	0	38	0	0	0	0	0	0	0	0	0	61	81	0	6	0	0	0	0	0	0	0	0
ASV_1488	Bacteria	Proteobacteria	Alphaproteobacteria	Rhizobiales	Xanthobacteraceae	Bradyrhizobium	elkanii	0	0	0	0	0	0	0	0	65	0	0	121	0	0	0	0	0	0	0	0	0	0	0	0	0	0
ASV_1489	Bacteria	Verrucomicrobiota	Chlamydiae	Chlamydiales	Parachlamydiaceae	Parachlamydia	unclassified_Parachlamydia	0	0	0	0	0	0	0	0	49	0	0	133	0	0	0	0	0	0	4	0	0	0	0	0	0	0
ASV_1490	Bacteria	Proteobacteria	Alphaproteobacteria	Rhizobiales	Xanthobacteraceae	Pseudolabrys	unclassified_Pseudolabrys	0	0	0	0	0	0	0	0	0	0	0	0	93	35	33	25	0	0	0	0	0	0	0	0	0	0
ASV_1491	Bacteria	Bacteroidota	Kapabacteria	Kapabacteriales	unclassified_Kapabacteriales	unclassified_Kapabacteriales	unclassified_Kapabacteriales	36	0	0	0	22	5	34	0	0	0	0	3	0	0	16	0	11	11	11	27	0	4	0	0	5	0
ASV_1492	Bacteria	Cyanobacteria	Cyanobacteriia	Cyanobacteriales	Nostocaceae	Nostoc PCC-73102	commune	0	5	19	34	0	0	81	0	0	0	0	0	0	0	11	0	0	0	27	0	0	8	0	0	0	0
ASV_1493	Bacteria	Verrucomicrobiota	Verrucomicrobiae	Chthoniobacterales	Chthoniobacteraceae	Chthoniobacter	unclassified_Chthoniobacter	0	0	0	73	0	0	27	0	0	0	0	0	0	0	0	0	62	23	0	0	0	0	0	0	0	0
ASV_1494	Bacteria	Actinobacteriota	Thermoleophilia	Gaiellales	unclassified_Gaiellales	unclassified_Gaiellales	unclassified_Gaiellales	0	0	0	0	0	0	0	0	0	0	0	0	0	0	0	127	0	9	0	0	0	49	0	0	0	0
ASV_1495	Bacteria	Planctomycetota	vadinHA49	unclassified_vadinHA49	unclassified_vadinHA49	unclassified_vadinHA49	unclassified_vadinHA49	28	66	0	0	0	0	0	0	0	0	0	0	3	0	0	0	87	0	0	0	0	0	0	0	0	0
ASV_1496	Bacteria	Chloroflexi	Anaerolineae	SBR1031	A4b	unclassified_A4b	unclassified_A4b	14	0	18	0	0	0	4	12	0	0	0	0	0	0	0	0	0	18	83	0	0	35	0	0	0	0
ASV_1497	Bacteria	Bdellovibrionota	Oligoflexia	0319-6G20	unclassified_0319-6G20	unclassified_0319-6G20	unclassified_0319-6G20	0	37	0	16	0	0	0	0	0	0	0	0	29	0	0	19	83	0	0	0	0	0	0	0	0	0
ASV_1498	Bacteria	Armatimonadota	unclassified_Armatimonadota	unclassified_Armatimonadota	unclassified_Armatimonadota	unclassified_Armatimonadota	unclassified_Armatimonadota	0	0	0	0	8	0	22	31	0	0	0	0	0	0	0	37	0	42	0	6	0	28	0	0	0	10
ASV_1499	Bacteria	Planctomycetota	vadinHA49	unclassified_vadinHA49	unclassified_vadinHA49	unclassified_vadinHA49	unclassified_vadinHA49	0	0	0	0	0	0	0	0	0	0	0	70	63	47	0	4	0	0	0	0	0	0	0	0	0	0
ASV_1500	Bacteria	Chloroflexi	KD4-96	unclassified_KD4-96	unclassified_KD4-96	unclassified_KD4-96	unclassified_KD4-96	0	0	0	0	0	0	0	0	0	0	0	0	0	0	0	0	0	0	0	0	86	0	0	98	0	0
ASV_1501	Bacteria	Bacteroidota	Bacteroidia	Sphingobacteriales	NS11-12 marine group	unclassified_NS11-12 marine group	unclassified_NS11-12 marine group	25	14	8	5	74	9	0	0	0	0	0	22	0	0	0	0	26	0	0	0	0	0	0	0	0	0
ASV_1502	Bacteria	Bdellovibrionota	Oligoflexia	0319-6G20	unclassified_0319-6G20	unclassified_0319-6G20	unclassified_0319-6G20	15	48	0	16	0	0	0	0	0	0	0	0	0	0	0	0	104	0	0	0	0	0	0	0	0	0
ASV_1503	Bacteria	Proteobacteria	Alphaproteobacteria	Rhizobiales	Xanthobacteraceae	unclassified_Xanthobacteraceae	unclassified_Xanthobacteraceae	0	35	0	0	0	0	0	0	84	0	0	0	0	0	0	0	64	0	0	0	0	0	0	0	0	0
ASV_1504	Bacteria	Actinobacteriota	Acidimicrobiia	unclassified_Acidimicrobiia	unclassified_Acidimicrobiia	unclassified_Acidimicrobiia	unclassified_Acidimicrobiia	0	0	0	13	31	0	30	38	0	0	0	0	0	0	0	8	0	0	0	0	0	0	0	63	0	0
ASV_1505	Bacteria	Actinobacteriota	Acidimicrobiia	Microtrichales	Ilumatobacteraceae	unclassified_Ilumatobacteraceae	unclassified_Ilumatobacteraceae	0	0	0	0	25	19	18	31	0	0	0	0	0	0	0	0	0	34	30	26	0	0	0	0	0	0
ASV_1506	Bacteria	Sumerlaeota	Sumerlaeia	Sumerlaeales	Sumerlaeaceae	Sumerlaea	unclassified_Sumerlaea	15	3	17	21	6	5	16	12	0	0	0	3	0	0	16	0	0	15	0	24	0	0	0	29	0	0
ASV_1507	Bacteria	Actinobacteriota	Actinobacteria	Micromonosporales	Micromonosporaceae	Actinoplanes	friuliensis	0	0	96	0	29	0	37	0	0	0	0	0	0	0	11	0	9	0	0	0	0	0	0	0	0	0
ASV_1508	Bacteria	Nitrospirota	Nitrospiria	Nitrospirales	Nitrospiraceae	Nitrospira	marina	0	0	38	0	0	0	18	44	0	0	0	0	39	0	15	0	3	0	18	0	0	0	0	0	0	7
ASV_1509	Bacteria	Verrucomicrobiota	Verrucomicrobiae	Chthoniobacterales	Chthoniobacteraceae	LD29	unclassified_LD29	0	0	21	29	0	0	14	16	0	0	0	0	0	0	60	0	42	0	0	0	0	0	0	0	0	0
ASV_1510	Bacteria	Chloroflexi	KD4-96	unclassified_KD4-96	unclassified_KD4-96	unclassified_KD4-96	unclassified_KD4-96	0	0	0	0	0	0	0	0	0	0	0	87	63	32	0	0	0	0	0	0	0	0	0	0	0	0
ASV_1511	Bacteria	Actinobacteriota	Acidimicrobiia	Microtrichales	Iamiaceae	Iamia	unclassified_Iamia	0	0	0	0	0	0	0	0	0	0	0	0	0	0	0	0	21	24	78	36	0	0	0	23	0	0
ASV_1512	Bacteria	Bacteroidota	Bacteroidia	Cytophagales	Spirosomaceae	Persicitalea	unclassified_Persicitalea	129	18	0	0	0	0	0	0	0	0	0	0	0	0	0	0	32	0	0	0	0	0	0	0	2	0
ASV_1513	Bacteria	Chloroflexi	Anaerolineae	Caldilineales	Caldilineaceae	unclassified_Caldilineaceae	unclassified_Caldilineaceae	52	31	35	0	16	0	0	0	0	0	0	0	0	0	0	0	47	0	0	0	0	0	0	0	0	0
ASV_1514	Bacteria	Actinobacteriota	Acidimicrobiia	Microtrichales	Iamiaceae	Iamia	unclassified_Iamia	27	28	0	55	0	0	0	9	0	0	0	0	0	0	34	0	28	0	0	0	0	0	0	0	0	0
ASV_1515	Bacteria	Bacteroidota	Bacteroidia	Cytophagales	Hymenobacteraceae	Hymenobacter	roseosalivarius	0	0	14	57	0	0	0	0	0	0	0	9	0	0	101	0	0	0	0	0	0	0	0	0	0	0
ASV_1516	Bacteria	Actinobacteriota	Thermoleophilia	Solirubrobacterales	67-14	unclassified_67-14	unclassified_67-14	0	0	0	0	0	0	0	0	108	16	0	57	0	0	0	0	0	0	0	0	0	0	0	0	0	0
ASV_1517	Bacteria	Proteobacteria	Gammaproteobacteria	Gammaproteobacteria Incertae Sedis	Unknown Family	Candidatus Ovatusbacter	unclassified_Candidatus Ovatusbacter	0	0	0	0	0	0	0	0	24	17	16	33	47	37	0	0	7	0	0	0	0	0	0	0	0	0
ASV_1518	Bacteria	Proteobacteria	Alphaproteobacteria	Rhizobiales	Rhizobiales Incertae Sedis	Bauldia	unclassified_Bauldia	0	0	0	0	0	0	0	0	0	0	0	27	114	40	0	0	0	0	0	0	0	0	0	0	0	0
ASV_1519	Bacteria	Proteobacteria	Alphaproteobacteria	Rhizobiales	Xanthobacteraceae	Bradyrhizobium	unclassified_Bradyrhizobium	0	0	0	0	0	0	0	0	0	0	0	0	0	0	0	0	181	0	0	0	0	0	0	0	0	0
ASV_1520	Bacteria	Actinobacteriota	Thermoleophilia	Solirubrobacterales	67-14	unclassified_67-14	unclassified_67-14	0	0	0	0	0	0	0	0	0	0	0	0	0	0	0	0	0	76	0	0	0	105	0	0	0	0
ASV_1521	Bacteria	Verrucomicrobiota	Verrucomicrobiae	Pedosphaerales	Pedosphaeraceae	unclassified_Pedosphaeraceae	unclassified_Pedosphaeraceae	0	0	0	0	0	0	0	0	0	0	0	0	0	0	0	0	0	0	14	0	0	167	0	0	0	0
ASV_1522	Bacteria	Proteobacteria	Alphaproteobacteria	Rhodospirillales	unclassified_Rhodospirillales	unclassified_Rhodospirillales	unclassified_Rhodospirillales	0	0	39	0	28	0	76	37	0	0	0	0	0	0	0	0	0	0	0	0	0	0	0	0	0	0
ASV_1523	Bacteria	Acidobacteriota	Acidobacteriae	Bryobacterales	Bryobacteraceae	Bryobacter	unclassified_Bryobacter	0	0	0	0	16	0	19	0	0	0	0	0	0	0	15	0	0	32	0	0	0	40	0	0	0	58
ASV_1524	Bacteria	Verrucomicrobiota	Chlamydiae	Chlamydiales	Parachlamydiaceae	unclassified_Parachlamydiaceae	unclassified_Parachlamydiaceae	0	0	0	0	0	0	0	0	124	7	0	14	13	0	0	0	16	0	0	0	0	0	0	0	0	6
ASV_1525	Bacteria	Actinobacteriota	Thermoleophilia	Solirubrobacterales	Solirubrobacteraceae	unclassified_Solirubrobacteraceae	unclassified_Solirubrobacteraceae	0	0	0	0	0	0	0	0	0	0	0	0	0	0	0	132	0	48	0	0	0	0	0	0	0	0
ASV_1526	Bacteria	Verrucomicrobiota	Verrucomicrobiae	Chthoniobacterales	Chthoniobacteraceae	Candidatus Udaeobacter	unclassified_Candidatus Udaeobacter	0	0	0	0	0	0	0	0	0	0	0	0	0	0	0	0	0	0	0	144	0	0	0	36	0	0
ASV_1527	Bacteria	Cyanobacteria	Cyanobacteriia	Cyanobacteriales	Nostocaceae	Nostoc PCC-73102	unclassified_Nostoc PCC-73102	0	0	179	0	0	0	0	0	0	0	0	0	0	0	0	0	0	0	0	0	0	0	0	0	0	0
ASV_1528	Bacteria	Acidobacteriota	Holophagae	Subgroup 7	unclassified_Subgroup 7	unclassified_Subgroup 7	unclassified_Subgroup 7	0	0	0	0	0	0	0	0	0	0	0	0	0	0	94	0	0	0	85	0	0	0	0	0	0	0
ASV_1529	Bacteria	Acidobacteriota	Blastocatellia	Blastocatellales	Blastocatellaceae	Stenotrophobacter	unclassified_Stenotrophobacter	0	0	0	0	0	0	0	0	0	0	0	0	0	0	0	0	0	66	0	0	0	90	0	0	23	0
ASV_1530	Bacteria	Actinobacteriota	Actinobacteria	Propionibacteriales	Nocardioidaceae	unclassified_Nocardioidaceae	unclassified_Nocardioidaceae	0	0	0	0	0	0	0	0	0	0	0	0	0	0	0	178	0	0	0	0	0	0	0	0	0	0
ASV_1531	Bacteria	Actinobacteriota	Acidimicrobiia	unclassified_Acidimicrobiia	unclassified_Acidimicrobiia	unclassified_Acidimicrobiia	unclassified_Acidimicrobiia	0	0	0	0	0	0	0	0	0	0	0	0	0	0	0	0	0	0	0	16	22	0	140	0	0	0
ASV_1532	Bacteria	Proteobacteria	Alphaproteobacteria	Sphingomonadales	Sphingomonadaceae	Sphingomonas	sediminicola	0	0	0	0	0	0	0	0	0	0	0	0	0	0	0	0	0	0	0	0	178	0	0	0	0	0
ASV_1533	Bacteria	Planctomycetota	Planctomycetes	Gemmatales	Gemmataceae	Gemmata	unclassified_Gemmata	0	21	0	14	0	0	0	0	0	20	17	53	0	0	0	6	46	0	0	0	0	0	0	0	0	0
ASV_1534	Bacteria	Armatimonadota	unclassified_Armatimonadota	unclassified_Armatimonadota	unclassified_Armatimonadota	unclassified_Armatimonadota	unclassified_Armatimonadota	0	0	20	0	33	2	56	0	0	0	0	0	0	0	21	45	0	0	0	0	0	0	0	0	0	0
ASV_1535	Bacteria	Bacteroidota	Bacteroidia	Chitinophagales	37-13	unclassified_37-13	unclassified_37-13	0	0	15	0	13	0	0	0	0	0	0	0	0	0	50	0	35	22	25	0	7	10	0	0	0	0
ASV_1536	Bacteria	Myxococcota	Polyangia	Polyangiales	Polyangiaceae	Aetherobacter	unclassified_Aetherobacter	0	0	0	16	0	0	0	0	0	0	54	107	0	0	0	0	0	0	0	0	0	0	0	0	0	0
ASV_1537	Bacteria	Proteobacteria	Alphaproteobacteria	Acetobacterales	Acetobacteraceae	unclassified_Acetobacteraceae	unclassified_Acetobacteraceae	0	0	0	0	0	29	0	0	0	0	0	0	0	0	0	125	0	23	0	0	0	0	0	0	0	0
ASV_1538	Bacteria	Gemmatimonadota	Gemmatimonadetes	Gemmatimonadales	Gemmatimonadaceae	Gemmatimonas	unclassified_Gemmatimonas	0	0	0	0	0	0	0	0	0	0	0	0	177	0	0	0	0	0	0	0	0	0	0	0	0	0
ASV_1539	Bacteria	Chloroflexi	KD4-96	unclassified_KD4-96	unclassified_KD4-96	unclassified_KD4-96	unclassified_KD4-96	0	0	0	0	0	0	0	0	0	0	0	0	86	30	0	0	61	0	0	0	0	0	0	0	0	0
ASV_1540	Bacteria	Bacteroidota	Bacteroidia	Chitinophagales	unclassified_Chitinophagales	unclassified_Chitinophagales	unclassified_Chitinophagales	0	0	0	0	0	0	0	0	0	0	0	0	0	0	144	33	0	0	0	0	0	0	0	0	0	0
ASV_1541	Bacteria	Verrucomicrobiota	Verrucomicrobiae	Chthoniobacterales	Chthoniobacteraceae	Chthoniobacter	unclassified_Chthoniobacter	0	0	0	0	0	0	0	0	0	0	0	0	0	0	100	77	0	0	0	0	0	0	0	0	0	0
ASV_1542	Bacteria	Verrucomicrobiota	Verrucomicrobiae	Chthoniobacterales	Chthoniobacteraceae	Chthoniobacter	unclassified_Chthoniobacter	0	0	0	0	0	0	0	0	0	0	0	0	0	0	0	0	0	0	0	109	0	0	0	68	0	0
ASV_1543	Bacteria	Proteobacteria	Alphaproteobacteria	Tistrellales	Geminicoccaceae	Geminicoccus	unclassified_Geminicoccus	40	27	43	0	27	0	30	9	0	0	0	0	0	0	0	0	0	0	0	0	0	0	0	0	0	0
ASV_1544	Bacteria	Bacteroidota	Ignavibacteria	SJA-28	unclassified_SJA-28	unclassified_SJA-28	unclassified_SJA-28	26	0	0	0	0	0	0	42	0	0	0	0	7	20	66	0	0	0	0	0	0	0	0	0	3	12
ASV_1545	Bacteria	Acidobacteriota	Blastocatellia	Blastocatellales	Blastocatellaceae	Blastocatella	unclassified_Blastocatella	15	7	0	33	0	0	0	0	0	0	0	0	0	0	0	0	121	0	0	0	0	0	0	0	0	0
ASV_1546	Bacteria	Bacteroidota	Kapabacteria	Kapabacteriales	unclassified_Kapabacteriales	unclassified_Kapabacteriales	unclassified_Kapabacteriales	10	0	0	0	7	0	11	4	0	0	0	0	0	0	70	15	28	12	0	0	0	6	0	0	0	13
ASV_1547	Bacteria	Bacteroidota	Bacteroidia	Cytophagales	Spirosomaceae	Persicitalea	jodogahamensis	0	7	0	0	0	0	0	0	0	0	0	0	0	0	39	0	0	0	83	0	0	47	0	0	0	0
ASV_1548	Bacteria	Acidobacteriota	Blastocatellia	Blastocatellales	Blastocatellaceae	JGI 0001001-H03	unclassified_JGI 0001001-H03	0	0	0	0	0	0	0	0	0	0	0	0	139	37	0	0	0	0	0	0	0	0	0	0	0	0
ASV_1549	Bacteria	Bacteroidota	Bacteroidia	Flavobacteriales	Flavobacteriaceae	unclassified_Flavobacteriaceae	unclassified_Flavobacteriaceae	0	0	0	0	0	0	0	0	0	0	0	0	0	0	0	0	0	0	62	0	114	0	0	0	0	0
ASV_1550	Bacteria	Acidobacteriota	Holophagae	Subgroup 7	unclassified_Subgroup 7	unclassified_Subgroup 7	unclassified_Subgroup 7	0	0	0	0	0	0	0	0	0	0	0	0	0	0	0	0	0	0	56	0	0	0	0	0	14	106
ASV_1551	Bacteria	Bacteroidota	Bacteroidia	Cytophagales	Hymenobacteraceae	Hymenobacter	unclassified_Hymenobacter	46	0	0	0	21	0	79	0	0	0	0	0	0	0	29	0	0	0	0	0	0	0	0	0	0	0
ASV_1552	Bacteria	Acidobacteriota	Vicinamibacteria	Vicinamibacterales	unclassified_Vicinamibacterales	unclassified_Vicinamibacterales	unclassified_Vicinamibacterales	0	0	0	0	0	0	0	0	0	0	0	0	0	0	0	105	0	70	0	0	0	0	0	0	0	0
ASV_1553	Bacteria	Gemmatimonadota	Gemmatimonadetes	Gemmatimonadales	Gemmatimonadaceae	unclassified_Gemmatimonadaceae	unclassified_Gemmatimonadaceae	0	0	0	0	0	0	0	0	0	0	0	0	0	0	0	0	0	0	126	0	49	0	0	0	0	0
ASV_1554	Bacteria	Proteobacteria	Alphaproteobacteria	Rhizobiales	Hyphomicrobiaceae	Pedomicrobium	unclassified_Pedomicrobium	0	0	0	0	0	0	0	0	0	0	0	0	0	0	0	0	0	0	0	0	0	0	0	0	0	175
ASV_1555	Bacteria	unclassified_Bacteria	unclassified_Bacteria	unclassified_Bacteria	unclassified_Bacteria	unclassified_Bacteria	unclassified_Bacteria	0	0	0	0	0	0	0	0	0	0	0	0	174	0	0	0	0	0	0	0	0	0	0	0	0	0
ASV_1556	Bacteria	Actinobacteriota	Thermoleophilia	Solirubrobacterales	Solirubrobacteraceae	Solirubrobacter	unclassified_Solirubrobacter	0	0	0	0	0	0	0	0	0	0	0	0	0	0	0	33	0	0	0	0	0	0	0	0	19	122
ASV_1557	Bacteria	Proteobacteria	Alphaproteobacteria	Sphingomonadales	Sphingomonadaceae	Sphingomonas	unclassified_Sphingomonas	0	0	0	0	0	0	0	0	0	0	0	0	0	0	0	0	0	0	0	0	174	0	0	0	0	0
ASV_1558	Bacteria	Proteobacteria	Alphaproteobacteria	Tistrellales	Geminicoccaceae	unclassified_Geminicoccaceae	unclassified_Geminicoccaceae	0	0	0	0	0	0	0	0	0	0	0	0	0	0	0	0	0	0	0	0	98	0	76	0	0	0
ASV_1559	Bacteria	Bacteroidota	unclassified_Bacteroidota	unclassified_Bacteroidota	unclassified_Bacteroidota	unclassified_Bacteroidota	unclassified_Bacteroidota	20	23	0	39	16	4	14	0	0	0	0	0	0	0	0	0	34	6	0	17	0	0	0	0	0	0
ASV_1560	Bacteria	Nitrospirota	Nitrospiria	Nitrospirales	Nitrospiraceae	Nitrospira	unclassified_Nitrospira	0	0	0	3	0	0	0	31	0	0	0	0	0	0	0	0	0	20	13	0	0	106	0	0	0	0
ASV_1561	Bacteria	Firmicutes	Clostridia	Clostridiales	Clostridiaceae	Clostridium sensu stricto 13	estertheticum	0	0	0	0	0	0	0	0	0	0	3	0	0	5	154	3	0	0	0	0	0	8	0	0	0	0
ASV_1562	Bacteria	Chloroflexi	Chloroflexia	Thermomicrobiales	JG30-KF-CM45	unclassified_JG30-KF-CM45	unclassified_JG30-KF-CM45	0	0	0	0	0	0	0	0	0	0	0	0	0	0	0	173	0	0	0	0	0	0	0	0	0	0
ASV_1563	Bacteria	Acidobacteriota	Blastocatellia	Blastocatellales	Blastocatellaceae	Blastocatella	unclassified_Blastocatella	0	0	0	0	0	0	0	0	0	0	0	0	0	0	0	0	0	173	0	0	0	0	0	0	0	0
ASV_1564	Bacteria	Actinobacteriota	Acidimicrobiia	Microtrichales	Ilumatobacteraceae	unclassified_Ilumatobacteraceae	unclassified_Ilumatobacteraceae	59	0	20	0	48	45	0	0	0	0	0	0	0	0	0	0	0	0	0	0	0	0	0	0	0	0
ASV_1565	Bacteria	Actinobacteriota	Acidimicrobiia	Microtrichales	Iamiaceae	Iamia	unclassified_Iamia	0	10	0	14	0	0	0	0	0	0	0	0	103	45	0	0	0	0	0	0	0	0	0	0	0	0
ASV_1566	Bacteria	Acidobacteriota	Blastocatellia	Blastocatellales	Blastocatellaceae	JGI 0001001-H03	unclassified_JGI 0001001-H03	0	0	21	0	0	0	0	0	0	0	0	0	0	0	151	0	0	0	0	0	0	0	0	0	0	0
ASV_1567	Bacteria	Deinococcota	Deinococci	Deinococcales	Trueperaceae	Truepera	unclassified_Truepera	0	0	0	0	47	0	58	48	0	0	0	0	0	0	0	19	0	0	0	0	0	0	0	0	0	0
ASV_1568	Bacteria	Actinobacteriota	Actinobacteria	Frankiales	unclassified_Frankiales	unclassified_Frankiales	unclassified_Frankiales	0	0	0	0	0	0	0	0	0	0	0	0	0	0	0	39	0	72	0	0	0	61	0	0	0	0
ASV_1569	Bacteria	Bacteroidota	Bacteroidia	Chitinophagales	unclassified_Chitinophagales	unclassified_Chitinophagales	unclassified_Chitinophagales	0	0	0	0	0	0	0	0	0	0	0	0	0	0	0	0	0	0	0	0	3	0	169	0	0	0
ASV_1570	Bacteria	Bdellovibrionota	Oligoflexia	0319-6G20	unclassified_0319-6G20	unclassified_0319-6G20	unclassified_0319-6G20	0	0	0	0	0	0	0	0	69	25	0	0	0	0	0	0	77	0	0	0	0	0	0	0	0	0
ASV_1571	Archaea	Crenarchaeota	Nitrososphaeria	Nitrososphaerales	Nitrososphaeraceae	unclassified_Nitrososphaeraceae	unclassified_Nitrososphaeraceae	0	0	0	0	0	0	0	0	0	0	0	0	0	0	73	0	0	98	0	0	0	0	0	0	0	0
ASV_1572	Bacteria	Gemmatimonadota	Gemmatimonadetes	Gemmatimonadales	Gemmatimonadaceae	unclassified_Gemmatimonadaceae	unclassified_Gemmatimonadaceae	0	0	0	0	0	0	0	0	0	0	0	0	0	0	58	0	0	0	106	0	0	7	0	0	0	0
ASV_1573	Bacteria	Gemmatimonadota	AKAU4049	unclassified_AKAU4049	unclassified_AKAU4049	unclassified_AKAU4049	unclassified_AKAU4049	0	0	0	0	0	0	0	0	0	0	0	0	0	0	0	19	0	71	25	0	0	50	0	0	0	6
ASV_1574	Bacteria	Bacteroidota	Bacteroidia	Flavobacteriales	Flavobacteriaceae	Aequorivita	antarctica	42	9	88	0	0	8	0	0	0	0	0	0	0	0	0	0	23	0	0	0	0	0	0	0	0	0
ASV_1575	Bacteria	Myxococcota	Polyangia	Polyangiales	Phaselicystidaceae	Phaselicystis	unclassified_Phaselicystis	0	0	10	0	0	0	0	0	0	0	0	61	37	0	0	0	25	0	10	0	0	23	0	0	0	4
ASV_1576	Bacteria	Actinobacteriota	Actinobacteria	Micromonosporales	Micromonosporaceae	Actinoplanes	unclassified_Actinoplanes	0	0	0	138	0	0	0	0	0	0	0	0	32	0	0	0	0	0	0	0	0	0	0	0	0	0
ASV_1577	Bacteria	Bacteroidota	Ignavibacteria	SJA-28	unclassified_SJA-28	unclassified_SJA-28	unclassified_SJA-28	0	0	0	0	0	0	0	0	35	0	0	105	30	0	0	0	0	0	0	0	0	0	0	0	0	0
ASV_1578	Bacteria	Bacteroidota	Bacteroidia	Sphingobacteriales	AKYH767	unclassified_AKYH767	unclassified_AKYH767	0	0	0	0	0	0	0	0	0	0	0	0	0	81	0	89	0	0	0	0	0	0	0	0	0	0
ASV_1579	Bacteria	Chloroflexi	Anaerolineae	Caldilineales	Caldilineaceae	unclassified_Caldilineaceae	unclassified_Caldilineaceae	0	0	0	0	0	0	0	0	0	0	0	0	0	0	0	0	0	0	0	0	104	0	66	0	0	0
ASV_1580	Bacteria	Verrucomicrobiota	Verrucomicrobiae	Opitutales	Opitutaceae	Opitutus	unclassified_Opitutus	0	33	0	0	0	0	0	6	0	0	0	0	0	0	0	0	123	0	7	0	0	0	0	0	0	0
ASV_1581	Bacteria	Bacteroidota	Bacteroidia	Cytophagales	Cyclobacteriaceae	unclassified_Cyclobacteriaceae	unclassified_Cyclobacteriaceae	0	0	0	0	0	0	0	25	0	0	0	0	0	0	0	0	0	5	119	0	0	20	0	0	0	0
ASV_1582	Bacteria	unclassified_Bacteria	unclassified_Bacteria	unclassified_Bacteria	unclassified_Bacteria	unclassified_Bacteria	unclassified_Bacteria	7	0	8	0	0	0	0	44	0	0	0	0	0	0	7	0	2	21	44	0	10	22	0	0	3	0
ASV_1583	Bacteria	Chloroflexi	Chloroflexia	Thermomicrobiales	JG30-KF-CM45	unclassified_JG30-KF-CM45	unclassified_JG30-KF-CM45	0	0	0	137	0	13	0	0	0	0	0	0	0	0	0	18	0	0	0	0	0	0	0	0	0	0
ASV_1584	Bacteria	Proteobacteria	Alphaproteobacteria	Rickettsiales	SM2D12	unclassified_SM2D12	unclassified_SM2D12	0	0	0	20	0	0	0	0	0	0	0	10	0	0	0	0	138	0	0	0	0	0	0	0	0	0
ASV_1585	Bacteria	Bacteroidota	Bacteroidia	Chitinophagales	Chitinophagaceae	Flavisolibacter	rigui	0	0	0	0	0	0	168	0	0	0	0	0	0	0	0	0	0	0	0	0	0	0	0	0	0	0
ASV_1586	Bacteria	Proteobacteria	Gammaproteobacteria	Gammaproteobacteria Incertae Sedis	Unknown Family	Candidatus Ovatusbacter	unclassified_Candidatus Ovatusbacter	0	0	0	0	0	0	0	0	0	0	131	37	0	0	0	0	0	0	0	0	0	0	0	0	0	0
ASV_1587	Bacteria	Actinobacteriota	Actinobacteria	Micrococcales	Microbacteriaceae	Amnibacterium	unclassified_Amnibacterium	14	21	0	114	0	0	0	0	0	0	0	18	0	0	0	0	0	0	0	0	0	0	0	0	0	0
ASV_1588	Bacteria	Bacteroidota	Bacteroidia	Chitinophagales	Chitinophagaceae	unclassified_Chitinophagaceae	unclassified_Chitinophagaceae	0	93	0	74	0	0	0	0	0	0	0	0	0	0	0	0	0	0	0	0	0	0	0	0	0	0
ASV_1589	Bacteria	Proteobacteria	Gammaproteobacteria	Xanthomonadales	Xanthomonadaceae	Arenimonas	unclassified_Arenimonas	0	0	0	0	0	0	0	0	0	0	0	148	0	0	0	0	0	0	0	0	0	0	0	0	0	19
ASV_1590	Bacteria	Bdellovibrionota	Oligoflexia	0319-6G20	unclassified_0319-6G20	unclassified_0319-6G20	unclassified_0319-6G20	40	24	0	51	37	14	0	0	0	0	0	0	0	0	0	0	0	0	0	0	0	0	0	0	0	0
ASV_1591	Bacteria	Verrucomicrobiota	Verrucomicrobiae	Pedosphaerales	Pedosphaeraceae	unclassified_Pedosphaeraceae	unclassified_Pedosphaeraceae	15	0	0	0	14	0	0	0	0	0	0	0	0	0	50	0	0	0	72	0	0	15	0	0	0	0
ASV_1592	Bacteria	Myxococcota	Polyangia	Polyangiales	Polyangiaceae	Aetherobacter	unclassified_Aetherobacter	0	0	18	0	0	0	51	61	0	0	0	0	0	0	26	0	0	10	0	0	0	0	0	0	0	0
ASV_1593	Bacteria	Planctomycetota	Planctomycetes	Planctomycetales	unclassified_Planctomycetales	unclassified_Planctomycetales	unclassified_Planctomycetales	0	0	0	0	0	0	29	49	0	0	0	0	0	0	0	0	0	28	21	0	0	39	0	0	0	0
ASV_1594	Bacteria	Proteobacteria	Alphaproteobacteria	Sphingomonadales	Sphingomonadaceae	Rhizorhapis	unclassified_Rhizorhapis	0	0	0	0	0	0	0	0	166	0	0	0	0	0	0	0	0	0	0	0	0	0	0	0	0	0
ASV_1595	Bacteria	Bacteroidota	Bacteroidia	Chitinophagales	Chitinophagaceae	Segetibacter	unclassified_Segetibacter	0	0	0	0	0	0	0	0	0	0	0	0	0	0	0	0	0	45	121	0	0	0	0	0	0	0
ASV_1596	Bacteria	Chloroflexi	KD4-96	unclassified_KD4-96	unclassified_KD4-96	unclassified_KD4-96	unclassified_KD4-96	0	0	0	0	0	0	0	0	0	0	0	0	0	0	0	0	0	0	14	116	36	0	0	0	0	0
ASV_1597	Bacteria	Actinobacteriota	Acidimicrobiia	Microtrichales	Iamiaceae	Iamia	unclassified_Iamia	0	0	0	0	0	0	0	0	0	0	0	0	0	0	0	0	0	0	0	166	0	0	0	0	0	0
ASV_1598	Bacteria	Proteobacteria	Alphaproteobacteria	Rhodobacterales	Rhodobacteraceae	unclassified_Rhodobacteraceae	unclassified_Rhodobacteraceae	0	0	0	0	0	0	0	0	0	0	0	0	0	0	0	0	0	0	0	39	0	0	0	127	0	0
ASV_1599	Bacteria	Proteobacteria	Alphaproteobacteria	Rhizobiales	Rhizobiaceae	Mesorhizobium	australicum	38	0	70	0	0	0	0	21	0	0	36	0	0	0	0	0	0	0	0	0	0	0	0	0	0	0
ASV_1600	Bacteria	Bacteroidota	Bacteroidia	Cytophagales	Hymenobacteraceae	Hymenobacter	nivis	14	21	0	95	0	0	0	0	0	0	0	9	20	0	0	6	0	0	0	0	0	0	0	0	0	0
ASV_1601	Bacteria	Chloroflexi	Chloroflexia	Thermomicrobiales	JG30-KF-CM45	unclassified_JG30-KF-CM45	unclassified_JG30-KF-CM45	0	10	0	25	0	0	0	0	68	8	10	38	6	0	0	0	0	0	0	0	0	0	0	0	0	0
ASV_1602	Bacteria	Acidobacteriota	Blastocatellia	Blastocatellales	Blastocatellaceae	Stenotrophobacter	unclassified_Stenotrophobacter	0	0	0	0	13	0	13	56	0	0	0	0	0	0	0	0	0	36	0	47	0	0	0	0	0	0
ASV_1603	Bacteria	Chloroflexi	Ktedonobacteria	C0119	unclassified_C0119	unclassified_C0119	unclassified_C0119	0	0	0	0	0	0	9	15	0	0	0	0	0	0	0	32	13	25	9	0	0	62	0	0	0	0
ASV_1604	Bacteria	Bdellovibrionota	Oligoflexia	Silvanigrellales	Silvanigrellaceae	unclassified_Silvanigrellaceae	unclassified_Silvanigrellaceae	0	17	41	0	0	0	80	0	0	0	0	0	0	0	22	0	4	0	0	0	0	0	0	0	0	0
ASV_1605	Bacteria	Proteobacteria	Alphaproteobacteria	Rhizobiales	Devosiaceae	Devosia	unclassified_Devosia	0	0	18	0	21	79	46	0	0	0	0	0	0	0	0	0	0	0	0	0	0	0	0	0	0	0
ASV_1606	Bacteria	Proteobacteria	Gammaproteobacteria	Burkholderiales	Sutterellaceae	unclassified_Sutterellaceae	unclassified_Sutterellaceae	0	0	0	0	0	0	0	0	0	0	0	0	0	0	0	0	0	164	0	0	0	0	0	0	0	0
ASV_1607	Bacteria	Myxococcota	Polyangia	Polyangiales	Polyangiaceae	Pajaroellobacter	unclassified_Pajaroellobacter	30	59	0	0	13	0	0	0	0	0	18	43	0	0	0	0	0	0	0	0	0	0	0	0	0	0
ASV_1608	Bacteria	Bacteroidota	Bacteroidia	Flavobacteriales	Flavobacteriaceae	Antarcticibacterium	unclassified_Antarcticibacterium	0	0	0	0	0	0	0	0	0	0	0	0	0	0	0	0	0	0	0	0	0	0	117	46	0	0
ASV_1609	Bacteria	Proteobacteria	Alphaproteobacteria	Rhizobiales	Xanthobacteraceae	Rhodopseudomonas	unclassified_Rhodopseudomonas	0	0	0	162	0	0	0	0	0	0	0	0	0	0	0	0	0	0	0	0	0	0	0	0	0	0
ASV_1610	Bacteria	Verrucomicrobiota	Verrucomicrobiae	Chthoniobacterales	Chthoniobacteraceae	Chthoniobacter	unclassified_Chthoniobacter	0	0	0	0	0	0	0	100	0	0	0	0	0	0	0	0	0	62	0	0	0	0	0	0	0	0
ASV_1611	Bacteria	Actinobacteriota	Rubrobacteria	Rubrobacterales	Rubrobacteriaceae	Rubrobacter	unclassified_Rubrobacter	0	0	0	0	0	0	0	0	0	0	0	0	0	0	25	81	0	56	0	0	0	0	0	0	0	0
ASV_1612	Bacteria	Acidobacteriota	Vicinamibacteria	Vicinamibacterales	unclassified_Vicinamibacterales	unclassified_Vicinamibacterales	unclassified_Vicinamibacterales	0	0	0	0	0	0	0	0	0	0	0	0	0	0	0	0	0	38	96	0	0	0	0	0	0	28
ASV_1613	Bacteria	Acidobacteriota	Blastocatellia	Blastocatellales	Blastocatellaceae	Aridibacter	unclassified_Aridibacter	83	0	33	0	0	0	45	0	0	0	0	0	0	0	0	0	0	0	0	0	0	0	0	0	0	0
ASV_1614	Bacteria	Acidobacteriota	Blastocatellia	Blastocatellales	Blastocatellaceae	Blastocatella	unclassified_Blastocatella	0	0	0	21	31	0	0	0	0	0	0	0	0	0	0	28	27	54	0	0	0	0	0	0	0	0
ASV_1615	Bacteria	Proteobacteria	Alphaproteobacteria	Acetobacterales	Acetobacteraceae	Roseomonas	unclassified_Roseomonas	0	0	0	20	9	0	0	0	65	21	0	37	0	0	0	0	9	0	0	0	0	0	0	0	0	0
ASV_1616	Bacteria	Proteobacteria	Alphaproteobacteria	Sphingomonadales	Sphingomonadaceae	Rhizorhapis	unclassified_Rhizorhapis	0	0	0	0	0	0	0	0	161	0	0	0	0	0	0	0	0	0	0	0	0	0	0	0	0	0
ASV_1617	Bacteria	Proteobacteria	Gammaproteobacteria	Diplorickettsiales	Diplorickettsiaceae	unclassified_Diplorickettsiaceae	unclassified_Diplorickettsiaceae	0	0	0	0	0	0	0	0	130	20	0	11	0	0	0	0	0	0	0	0	0	0	0	0	0	0
ASV_1618	Bacteria	Proteobacteria	Alphaproteobacteria	Rhizobiales	Hyphomicrobiaceae	Pedomicrobium	unclassified_Pedomicrobium	0	0	0	0	0	0	0	0	0	0	0	161	0	0	0	0	0	0	0	0	0	0	0	0	0	0
ASV_1619	Bacteria	Chloroflexi	KD4-96	unclassified_KD4-96	unclassified_KD4-96	unclassified_KD4-96	unclassified_KD4-96	0	0	0	0	0	0	0	0	0	0	0	0	0	0	0	0	0	72	89	0	0	0	0	0	0	0
ASV_1620	Bacteria	Proteobacteria	Alphaproteobacteria	Sphingomonadales	Sphingomonadaceae	Sphingomonas	oligophenolica	34	37	0	31	15	0	43	0	0	0	0	0	0	0	0	0	0	0	0	0	0	0	0	0	0	0
ASV_1622	Bacteria	Chloroflexi	Chloroflexia	Chloroflexales	Chloroflexaceae	Candidatus Chloroploca	unclassified_Candidatus Chloroploca	0	0	46	0	4	4	27	0	0	0	0	0	0	0	0	0	0	3	30	0	0	46	0	0	0	0
ASV_1623	Bacteria	Chloroflexi	Anaerolineae	RBG-13-54-9	unclassified_RBG-13-54-9	unclassified_RBG-13-54-9	unclassified_RBG-13-54-9	0	0	4	0	16	0	5	44	0	0	0	0	0	0	21	0	0	7	26	0	0	37	0	0	0	0
ASV_1624	Bacteria	Planctomycetota	Planctomycetes	Pirellulales	Pirellulaceae	Pir4 lineage	unclassified_Pir4 lineage	0	0	0	0	3	0	0	0	0	0	0	0	91	35	0	0	31	0	0	0	0	0	0	0	0	0
ASV_1625	Bacteria	Actinobacteriota	Thermoleophilia	Solirubrobacterales	67-14	unclassified_67-14	unclassified_67-14	0	0	0	0	0	0	0	0	0	0	0	0	0	0	18	71	0	0	0	0	0	0	0	0	0	71
ASV_1626	Bacteria	Actinobacteriota	Actinobacteria	Propionibacteriales	Nocardioidaceae	Nocardioides	unclassified_Nocardioides	54	0	0	0	0	0	0	0	0	0	0	0	22	0	0	0	83	0	0	0	0	0	0	0	0	0
ASV_1627	Bacteria	Myxococcota	Polyangia	Polyangiales	Sandaracinaceae	Sandaracinus	unclassified_Sandaracinus	0	20	0	0	0	0	0	0	5	0	46	14	24	0	0	0	37	0	0	0	0	0	0	0	0	13
ASV_1628	Bacteria	Verrucomicrobiota	Verrucomicrobiae	Verrucomicrobiales	Rubritaleaceae	Luteolibacter	unclassified_Luteolibacter	0	0	48	0	15	8	32	0	0	0	0	0	0	0	0	0	0	0	25	0	0	31	0	0	0	0
ASV_1629	Bacteria	Proteobacteria	Gammaproteobacteria	Burkholderiales	TRA3-20	unclassified_TRA3-20	unclassified_TRA3-20	0	0	0	0	0	0	0	0	10	0	0	33	52	0	0	0	14	0	0	0	0	50	0	0	0	0
ASV_1630	Bacteria	Chloroflexi	KD4-96	unclassified_KD4-96	unclassified_KD4-96	unclassified_KD4-96	unclassified_KD4-96	0	0	0	0	0	0	0	0	0	0	0	0	159	0	0	0	0	0	0	0	0	0	0	0	0	0
ASV_1631	Bacteria	Proteobacteria	Gammaproteobacteria	Burkholderiales	Nitrosomonadaceae	Nitrosospira	unclassified_Nitrosospira	0	0	0	0	0	0	0	0	0	0	0	0	149	0	10	0	0	0	0	0	0	0	0	0	0	0
ASV_1632	Bacteria	Actinobacteriota	Acidimicrobiia	unclassified_Acidimicrobiia	unclassified_Acidimicrobiia	unclassified_Acidimicrobiia	unclassified_Acidimicrobiia	0	0	0	0	0	0	0	0	0	0	0	0	0	0	0	0	0	0	0	81	0	0	0	78	0	0
ASV_1633	Bacteria	Bacteroidota	Bacteroidia	Chitinophagales	Chitinophagaceae	Flavitalea	unclassified_Flavitalea	0	0	53	37	0	0	0	33	0	0	0	0	0	0	0	0	0	31	0	0	0	4	0	0	0	0
ASV_1634	Bacteria	Proteobacteria	Alphaproteobacteria	Rhizobiales	Xanthobacteraceae	Rhodoplanes	unclassified_Rhodoplanes	0	0	0	0	44	0	0	0	0	0	0	0	0	0	24	27	0	10	0	0	0	41	0	0	0	12
ASV_1635	Bacteria	Actinobacteriota	Acidimicrobiia	Microtrichales	Iamiaceae	Iamia	majanohamensis	0	0	0	0	0	0	0	0	0	0	0	0	0	0	0	0	0	0	31	0	127	0	0	0	0	0
ASV_1636	Bacteria	WPS-2	unclassified_WPS-2	unclassified_WPS-2	unclassified_WPS-2	unclassified_WPS-2	unclassified_WPS-2	0	26	48	16	7	9	0	0	0	5	17	6	0	0	0	0	23	0	0	0	0	0	0	0	0	0
ASV_1637	Bacteria	Verrucomicrobiota	Verrucomicrobiae	Pedosphaerales	Pedosphaeraceae	unclassified_Pedosphaeraceae	unclassified_Pedosphaeraceae	0	0	19	0	0	0	34	17	0	0	0	0	0	0	0	0	0	30	19	32	0	0	0	6	0	0
ASV_1638	Bacteria	Bacteroidota	Bacteroidia	Sphingobacteriales	Sphingobacteriaceae	Mucilaginibacter	unclassified_Mucilaginibacter	0	0	0	141	0	0	0	0	0	0	0	0	16	0	0	0	0	0	0	0	0	0	0	0	0	0
ASV_1639	Bacteria	Gemmatimonadota	Gemmatimonadetes	Gemmatimonadales	Gemmatimonadaceae	unclassified_Gemmatimonadaceae	unclassified_Gemmatimonadaceae	0	0	0	0	29	0	0	27	0	0	0	0	0	0	84	0	0	17	0	0	0	0	0	0	0	0
ASV_1640	Bacteria	Acidobacteriota	Blastocatellia	Blastocatellales	Blastocatellaceae	Blastocatella	unclassified_Blastocatella	0	0	0	0	13	0	0	0	0	0	0	0	0	0	45	99	0	0	0	0	0	0	0	0	0	0
ASV_1641	Bacteria	Actinobacteriota	Thermoleophilia	Solirubrobacterales	Solirubrobacteraceae	Solirubrobacter	unclassified_Solirubrobacter	0	0	0	0	0	0	48	57	0	0	0	0	0	0	0	0	0	52	0	0	0	0	0	0	0	0
ASV_1642	Bacteria	Proteobacteria	Alphaproteobacteria	Caulobacterales	Caulobacteraceae	unclassified_Caulobacteraceae	unclassified_Caulobacteraceae	0	0	0	0	0	0	0	0	0	0	0	0	134	23	0	0	0	0	0	0	0	0	0	0	0	0
ASV_1643	Bacteria	Actinobacteriota	Thermoleophilia	Gaiellales	unclassified_Gaiellales	unclassified_Gaiellales	unclassified_Gaiellales	0	0	0	0	0	0	0	0	0	0	0	0	0	0	0	0	0	0	0	0	0	157	0	0	0	0
ASV_1644	Bacteria	Planctomycetota	Planctomycetes	Gemmatales	Gemmataceae	unclassified_Gemmataceae	unclassified_Gemmataceae	0	0	0	0	14	0	9	0	0	0	0	0	0	0	29	0	0	50	0	0	0	23	0	0	0	31
ASV_1645	Bacteria	Myxococcota	Polyangia	Polyangiales	BIrii41	unclassified_BIrii41	unclassified_BIrii41	0	0	0	0	0	0	0	0	0	0	0	52	15	75	14	0	0	0	0	0	0	0	0	0	0	0
ASV_1646	Bacteria	Bacteroidota	Bacteroidia	Chitinophagales	Chitinophagaceae	Ferruginibacter	unclassified_Ferruginibacter	34	0	0	0	0	0	0	0	0	0	0	0	0	0	70	0	0	0	51	0	0	0	0	0	0	0
ASV_1647	Bacteria	Chloroflexi	Dehalococcoidia	SAR202 clade	unclassified_SAR202 clade	unclassified_SAR202 clade	unclassified_SAR202 clade	16	0	7	0	14	0	0	10	13	0	0	0	0	0	22	0	0	0	36	7	0	11	0	0	0	19
ASV_1648	Bacteria	Gemmatimonadota	S0134 terrestrial group	unclassified_S0134 terrestrial group	unclassified_S0134 terrestrial group	unclassified_S0134 terrestrial group	unclassified_S0134 terrestrial group	14	0	23	0	0	0	24	25	0	0	0	0	0	0	0	0	0	38	31	0	0	0	0	0	0	0
ASV_1649	Bacteria	Bacteroidota	Bacteroidia	Cytophagales	Spirosomaceae	Spirosoma	unclassified_Spirosoma	0	0	0	22	0	0	0	3	0	0	0	0	104	0	19	7	0	0	0	0	0	0	0	0	0	0
ASV_1650	Bacteria	Bdellovibrionota	Oligoflexia	0319-6G20	unclassified_0319-6G20	unclassified_0319-6G20	unclassified_0319-6G20	0	0	0	0	0	0	0	0	37	29	34	29	0	0	0	0	26	0	0	0	0	0	0	0	0	0
ASV_1651	Bacteria	Proteobacteria	Gammaproteobacteria	Burkholderiales	Oxalobacteraceae	Herminiimonas	unclassified_Herminiimonas	0	0	0	0	0	0	0	0	0	0	0	0	116	0	0	0	0	0	0	0	0	0	0	0	0	39
ASV_1652	Bacteria	Gemmatimonadota	Gemmatimonadetes	Gemmatimonadales	Gemmatimonadaceae	unclassified_Gemmatimonadaceae	unclassified_Gemmatimonadaceae	0	0	0	0	0	0	0	0	0	0	0	0	0	0	39	0	0	0	43	0	0	73	0	0	0	0
ASV_1653	Bacteria	Verrucomicrobiota	Verrucomicrobiae	Verrucomicrobiales	Rubritaleaceae	Luteolibacter	algae	0	0	0	0	0	0	0	0	0	0	0	0	0	0	0	0	0	52	103	0	0	0	0	0	0	0
ASV_1654	Bacteria	Verrucomicrobiota	Verrucomicrobiae	Chthoniobacterales	Chthoniobacteraceae	unclassified_Chthoniobacteraceae	unclassified_Chthoniobacteraceae	0	0	0	0	0	0	0	0	0	0	0	0	0	0	0	0	0	0	44	100	11	0	0	0	0	0
ASV_1655	Bacteria	Deinococcota	Deinococci	Deinococcales	Trueperaceae	Truepera	unclassified_Truepera	0	0	0	0	0	0	0	0	0	0	0	0	0	0	0	0	0	0	0	0	43	0	112	0	0	0
ASV_1656	Bacteria	Proteobacteria	Alphaproteobacteria	Sphingomonadales	Sphingomonadaceae	Sphingomonas	unclassified_Sphingomonas	0	40	0	29	0	0	0	0	0	0	0	25	36	0	0	0	24	0	0	0	0	0	0	0	0	0
ASV_1657	Bacteria	Gemmatimonadota	Gemmatimonadetes	Gemmatimonadales	Gemmatimonadaceae	Gemmatimonas	unclassified_Gemmatimonas	0	0	0	154	0	0	0	0	0	0	0	0	0	0	0	0	0	0	0	0	0	0	0	0	0	0
ASV_1658	Bacteria	Proteobacteria	Alphaproteobacteria	Sphingomonadales	Sphingomonadaceae	Novosphingobium	unclassified_Novosphingobium	0	0	0	35	0	0	0	0	0	0	0	0	0	0	0	68	0	0	0	0	0	0	0	0	0	51
ASV_1659	Bacteria	Actinobacteriota	Thermoleophilia	Solirubrobacterales	67-14	unclassified_67-14	unclassified_67-14	0	0	0	31	0	0	0	14	0	0	0	0	0	0	0	76	0	33	0	0	0	0	0	0	0	0
ASV_1660	Bacteria	Bdellovibrionota	Bdellovibrionia	Bacteriovoracales	Bacteriovoracaceae	Peredibacter	unclassified_Peredibacter	0	0	0	20	0	0	0	0	45	25	27	28	0	0	9	0	0	0	0	0	0	0	0	0	0	0
ASV_1661	Bacteria	Acidobacteriota	Vicinamibacteria	Vicinamibacterales	Vicinamibacteraceae	unclassified_Vicinamibacteraceae	unclassified_Vicinamibacteraceae	0	0	0	0	23	0	0	9	0	0	0	0	0	0	22	0	0	0	15	0	0	0	0	0	0	85
ASV_1662	Bacteria	Actinobacteriota	Actinobacteria	Propionibacteriales	Nocardioidaceae	unclassified_Nocardioidaceae	unclassified_Nocardioidaceae	0	0	0	0	22	0	0	27	23	0	0	0	0	0	0	0	0	12	0	0	0	0	0	0	0	70
ASV_1663	Bacteria	Nitrospirota	Nitrospiria	Nitrospirales	Nitrospiraceae	Nitrospira	bacterium	0	0	0	0	0	0	32	0	0	0	0	0	0	0	0	0	0	0	0	0	58	64	0	0	0	0
ASV_1664	Bacteria	Proteobacteria	Alphaproteobacteria	Caulobacterales	Caulobacteraceae	Phenylobacterium	unclassified_Phenylobacterium	0	0	0	0	0	0	0	0	0	0	154	0	0	0	0	0	0	0	0	0	0	0	0	0	0	0
ASV_1665	Bacteria	Proteobacteria	Gammaproteobacteria	Xanthomonadales	Xanthomonadaceae	Pseudoxanthomonas	unclassified_Pseudoxanthomonas	0	0	0	0	0	0	0	0	0	0	0	0	0	0	50	0	0	0	82	22	0	0	0	0	0	0
ASV_1666	Bacteria	Chloroflexi	Anaerolineae	SBR1031	A4b	unclassified_A4b	unclassified_A4b	0	0	0	0	0	0	0	0	0	0	0	0	0	0	0	154	0	0	0	0	0	0	0	0	0	0
ASV_1667	Bacteria	Chloroflexi	KD4-96	unclassified_KD4-96	unclassified_KD4-96	unclassified_KD4-96	unclassified_KD4-96	0	0	0	0	0	0	0	0	0	0	0	0	0	0	0	0	0	0	0	0	0	0	154	0	0	0
ASV_1668	Bacteria	Actinobacteriota	Thermoleophilia	Gaiellales	unclassified_Gaiellales	unclassified_Gaiellales	unclassified_Gaiellales	26	21	0	29	9	4	0	0	0	0	0	0	0	0	18	0	29	0	0	17	0	0	0	0	0	0
ASV_1669	Bacteria	Actinobacteriota	Actinobacteria	Micromonosporales	Micromonosporaceae	Dactylosporangium	unclassified_Dactylosporangium	15	6	11	11	10	0	27	0	0	0	0	0	0	0	0	66	0	0	7	0	0	0	0	0	0	0
ASV_1670	Bacteria	Bacteroidota	Bacteroidia	Sphingobacteriales	NS11-12 marine group	unclassified_NS11-12 marine group	unclassified_NS11-12 marine group	0	8	0	0	0	0	0	0	0	0	0	22	64	34	0	0	17	0	0	0	0	0	0	0	0	8
ASV_1671	Bacteria	Proteobacteria	Gammaproteobacteria	Burkholderiales	Burkholderiaceae	Lautropia	unclassified_Lautropia	0	0	0	0	32	0	14	0	0	0	0	0	0	0	32	22	0	21	0	0	0	32	0	0	0	0
ASV_1672	Bacteria	Chloroflexi	Chloroflexia	Chloroflexales	Herpetosiphonaceae	Herpetosiphon	unclassified_Herpetosiphon	0	0	0	0	0	6	0	0	0	0	0	0	0	0	43	0	0	47	5	52	0	0	0	0	0	0
ASV_1673	Bacteria	Verrucomicrobiota	Verrucomicrobiae	Chthoniobacterales	Chthoniobacteraceae	Chthoniobacter	unclassified_Chthoniobacter	0	0	0	0	0	0	93	60	0	0	0	0	0	0	0	0	0	0	0	0	0	0	0	0	0	0
ASV_1674	Bacteria	Dependentiae	Babeliae	Babeliales	Vermiphilaceae	unclassified_Vermiphilaceae	unclassified_Vermiphilaceae	0	0	0	0	0	0	0	0	0	0	0	0	0	0	0	0	0	0	0	0	48	0	105	0	0	0
ASV_1675	Bacteria	Nitrospirota	Nitrospiria	Nitrospirales	Nitrospiraceae	Nitrospira	unclassified_Nitrospira	0	0	0	0	0	0	0	0	0	0	0	0	0	0	0	0	0	0	0	0	0	0	0	0	0	153
ASV_1676	Bacteria	unclassified_Bacteria	unclassified_Bacteria	unclassified_Bacteria	unclassified_Bacteria	unclassified_Bacteria	unclassified_Bacteria	4	52	0	0	0	0	0	0	0	0	26	0	25	15	0	0	30	0	0	0	0	0	0	0	0	0
ASV_1677	Bacteria	Acidobacteriota	Blastocatellia	Blastocatellales	Blastocatellaceae	Aridibacter	unclassified_Aridibacter	0	0	42	0	0	0	71	39	0	0	0	0	0	0	0	0	0	0	0	0	0	0	0	0	0	0
ASV_1678	Bacteria	Planctomycetota	Phycisphaerae	Tepidisphaerales	WD2101 soil group	unclassified_WD2101 soil group	unclassified_WD2101 soil group	0	0	0	6	34	12	0	11	0	0	0	0	0	0	35	54	0	0	0	0	0	0	0	0	0	0
ASV_1679	Bacteria	Chloroflexi	Anaerolineae	Ardenticatenales	Ardenticatenaceae	unclassified_Ardenticatenaceae	unclassified_Ardenticatenaceae	0	0	0	0	30	0	47	7	0	0	0	0	0	0	0	0	0	0	68	0	0	0	0	0	0	0
ASV_1680	Bacteria	Bacteroidota	Bacteroidia	Chitinophagales	Chitinophagaceae	Flavisolibacter	unclassified_Flavisolibacter	0	0	0	0	0	0	152	0	0	0	0	0	0	0	0	0	0	0	0	0	0	0	0	0	0	0
ASV_1681	Bacteria	Proteobacteria	Gammaproteobacteria	Diplorickettsiales	Diplorickettsiaceae	Aquicella	unclassified_Aquicella	0	0	0	0	0	0	0	0	129	4	0	19	0	0	0	0	0	0	0	0	0	0	0	0	0	0
ASV_1682	Bacteria	Verrucomicrobiota	Verrucomicrobiae	Chthoniobacterales	Chthoniobacteraceae	Candidatus Udaeobacter	unclassified_Candidatus Udaeobacter	0	0	0	0	0	0	0	0	0	0	0	0	0	0	0	152	0	0	0	0	0	0	0	0	0	0
ASV_1683	Bacteria	Bacteroidota	Bacteroidia	Flavobacteriales	Crocinitomicaceae	Salinirepens	unclassified_Salinirepens	66	23	19	0	14	0	29	0	0	0	0	0	0	0	0	0	0	0	0	0	0	0	0	0	0	0
ASV_1684	Bacteria	Proteobacteria	Alphaproteobacteria	Rhizobiales	Beijerinckiaceae	Microvirga	unclassified_Microvirga	47	47	0	57	0	0	0	0	0	0	0	0	0	0	0	0	0	0	0	0	0	0	0	0	0	0
ASV_1685	Bacteria	Actinobacteriota	Actinobacteria	Pseudonocardiales	Pseudonocardiaceae	Pseudonocardia	dioxanivorans	20	22	0	0	0	0	0	0	0	0	0	0	0	18	0	0	91	0	0	0	0	0	0	0	0	0
ASV_1686	Bacteria	unclassified_Bacteria	unclassified_Bacteria	unclassified_Bacteria	unclassified_Bacteria	unclassified_Bacteria	unclassified_Bacteria	5	0	0	0	34	3	26	81	0	0	0	0	0	0	0	0	0	2	0	0	0	0	0	0	0	0
ASV_1687	Bacteria	Cyanobacteria	Cyanobacteriia	Phormidesmiales	Phormidesmiaceae	Phormidesmis ANT.LACV5.1	priestleyi	0	0	16	28	0	0	16	0	0	0	0	0	0	0	27	0	0	0	13	14	0	37	0	0	0	0
ASV_1688	Bacteria	Actinobacteriota	Thermoleophilia	Gaiellales	unclassified_Gaiellales	unclassified_Gaiellales	unclassified_Gaiellales	0	0	16	0	0	0	0	31	0	0	0	0	0	0	80	19	0	5	0	0	0	0	0	0	0	0
ASV_1689	Bacteria	Bacteroidota	Bacteroidia	Cytophagales	Microscillaceae	Ohtaekwangia	unclassified_Ohtaekwangia	0	0	0	0	0	0	136	0	0	0	0	0	0	0	0	7	0	0	0	0	0	8	0	0	0	0
ASV_1690	Bacteria	Actinobacteriota	Thermoleophilia	Gaiellales	unclassified_Gaiellales	unclassified_Gaiellales	unclassified_Gaiellales	0	0	0	0	0	0	0	13	28	0	0	0	0	0	62	0	0	0	0	0	0	0	0	48	0	0
ASV_1691	Bacteria	Proteobacteria	Gammaproteobacteria	Burkholderiales	Comamonadaceae	Leptothrix	unclassified_Leptothrix	0	0	0	0	0	0	0	0	0	0	151	0	0	0	0	0	0	0	0	0	0	0	0	0	0	0
ASV_1692	Bacteria	Acidobacteriota	Vicinamibacteria	Vicinamibacterales	unclassified_Vicinamibacterales	unclassified_Vicinamibacterales	unclassified_Vicinamibacterales	0	0	0	0	0	0	0	0	0	0	0	21	73	57	0	0	0	0	0	0	0	0	0	0	0	0
ASV_1693	Bacteria	Bacteroidota	Bacteroidia	Chitinophagales	Saprospiraceae	unclassified_Saprospiraceae	unclassified_Saprospiraceae	0	0	0	0	0	0	0	0	0	0	0	9	47	55	0	0	0	0	40	0	0	0	0	0	0	0
ASV_1694	Bacteria	Gemmatimonadota	Gemmatimonadetes	Gemmatimonadales	Gemmatimonadaceae	Gemmatimonas	unclassified_Gemmatimonas	0	0	0	0	0	0	0	0	0	0	0	0	151	0	0	0	0	0	0	0	0	0	0	0	0	0
ASV_1695	Bacteria	Bacteroidota	Ignavibacteria	SJA-28	unclassified_SJA-28	unclassified_SJA-28	unclassified_SJA-28	0	0	0	0	0	0	0	0	0	0	0	0	0	0	0	0	0	151	0	0	0	0	0	0	0	0
ASV_1696	Bacteria	Sumerlaeota	Sumerlaeia	Sumerlaeales	Sumerlaeaceae	Sumerlaea	unclassified_Sumerlaea	0	0	0	0	0	0	0	0	0	0	0	0	0	0	0	0	0	26	0	0	0	0	0	125	0	0
ASV_1697	Bacteria	Proteobacteria	Alphaproteobacteria	Tistrellales	Geminicoccaceae	unclassified_Geminicoccaceae	unclassified_Geminicoccaceae	0	0	0	0	0	0	0	0	0	0	0	0	0	0	0	0	0	0	0	11	84	0	13	43	0	0
ASV_1698	Bacteria	Actinobacteriota	Acidimicrobiia	Microtrichales	Ilumatobacteraceae	unclassified_Ilumatobacteraceae	unclassified_Ilumatobacteraceae	37	31	0	82	0	0	0	0	0	0	0	0	0	0	0	0	0	0	0	0	0	0	0	0	0	0
ASV_1699	Bacteria	Proteobacteria	Alphaproteobacteria	Sphingomonadales	Sphingomonadaceae	unclassified_Sphingomonadaceae	unclassified_Sphingomonadaceae	29	0	0	0	0	0	31	15	0	0	0	0	0	0	0	0	0	0	0	30	27	0	10	8	0	0
ASV_1700	Bacteria	Verrucomicrobiota	Chlamydiae	Chlamydiales	Simkaniaceae	unclassified_Simkaniaceae	unclassified_Simkaniaceae	0	6	0	0	0	0	0	0	11	7	0	23	103	0	0	0	0	0	0	0	0	0	0	0	0	0
ASV_1701	Bacteria	Planctomycetota	Phycisphaerae	Tepidisphaerales	WD2101 soil group	unclassified_WD2101 soil group	unclassified_WD2101 soil group	0	0	0	0	0	0	96	37	0	0	0	0	0	0	0	0	0	17	0	0	0	0	0	0	0	0
ASV_1702	Bacteria	Bacteroidota	Bacteroidia	Chitinophagales	Chitinophagaceae	Flavitalea	unclassified_Flavitalea	0	0	0	0	0	0	0	0	29	0	0	0	77	0	0	0	44	0	0	0	0	0	0	0	0	0
ASV_1703	Bacteria	Verrucomicrobiota	Verrucomicrobiae	Chthoniobacterales	Chthoniobacteraceae	Candidatus Udaeobacter	unclassified_Candidatus Udaeobacter	0	0	0	0	0	0	0	0	0	0	0	0	51	0	0	0	0	0	0	0	0	59	0	0	0	40
ASV_1704	Bacteria	Proteobacteria	Gammaproteobacteria	Burkholderiales	Oxalobacteraceae	[Aquaspirillum] arcticum group	unclassified_[Aquaspirillum] arcticum group	0	0	0	0	0	0	0	0	0	0	0	0	0	0	150	0	0	0	0	0	0	0	0	0	0	0
ASV_1705	Bacteria	Bacteroidota	Bacteroidia	Cytophagales	Cyclobacteriaceae	Cyclobacterium	unclassified_Cyclobacterium	0	0	0	0	0	0	0	0	0	0	0	0	0	0	0	0	0	0	0	0	134	0	16	0	0	0
ASV_1706	Bacteria	Chloroflexi	Chloroflexia	Thermomicrobiales	JG30-KF-CM45	unclassified_JG30-KF-CM45	unclassified_JG30-KF-CM45	0	0	5	5	23	0	24	36	0	0	0	0	0	0	3	19	0	34	0	0	0	0	0	0	0	0
ASV_1707	Bacteria	Acidobacteriota	Blastocatellia	Blastocatellales	Blastocatellaceae	Blastocatella	unclassified_Blastocatella	0	0	0	63	0	0	0	0	0	0	0	0	58	0	0	28	0	0	0	0	0	0	0	0	0	0
ASV_1708	Bacteria	Bacteroidota	Bacteroidia	Chitinophagales	Chitinophagaceae	unclassified_Chitinophagaceae	unclassified_Chitinophagaceae	0	0	0	0	0	0	0	0	9	12	40	73	0	15	0	0	0	0	0	0	0	0	0	0	0	0
ASV_1709	Bacteria	Chloroflexi	Ktedonobacteria	C0119	unclassified_C0119	unclassified_C0119	unclassified_C0119	0	0	0	0	0	0	0	0	0	0	101	0	48	0	0	0	0	0	0	0	0	0	0	0	0	0
ASV_1710	Bacteria	Acidobacteriota	Blastocatellia	Pyrinomonadales	Pyrinomonadaceae	RB41	unclassified_RB41	0	0	0	0	0	0	0	0	0	0	0	0	0	0	0	0	0	149	0	0	0	0	0	0	0	0
ASV_1711	Bacteria	Proteobacteria	Gammaproteobacteria	Burkholderiales	Burkholderiaceae	Limnobacter	unclassified_Limnobacter	0	0	0	0	0	0	0	0	0	0	0	0	0	0	0	0	0	10	17	44	0	0	0	78	0	0
ASV_1712	Bacteria	Bacteroidota	Bacteroidia	Chitinophagales	Saprospiraceae	unclassified_Saprospiraceae	unclassified_Saprospiraceae	0	0	0	0	0	0	0	0	0	0	0	0	0	0	0	0	0	0	20	0	129	0	0	0	0	0
ASV_1713	Bacteria	Bdellovibrionota	Oligoflexia	0319-6G20	unclassified_0319-6G20	unclassified_0319-6G20	unclassified_0319-6G20	30	24	0	0	38	0	0	23	0	0	0	0	25	0	0	0	0	0	0	0	0	0	0	0	8	0
ASV_1714	Bacteria	Chloroflexi	Dehalococcoidia	S085	unclassified_S085	unclassified_S085	unclassified_S085	7	0	6	0	0	0	15	11	18	0	0	0	0	0	0	9	8	23	20	0	0	31	0	0	0	0
ASV_1715	Bacteria	Proteobacteria	Alphaproteobacteria	Sphingomonadales	Sphingomonadaceae	Sphingomonas	unclassified_Sphingomonas	0	0	0	148	0	0	0	0	0	0	0	0	0	0	0	0	0	0	0	0	0	0	0	0	0	0
ASV_1716	Bacteria	Bacteroidota	Bacteroidia	Chitinophagales	Chitinophagaceae	Segetibacter	unclassified_Segetibacter	0	0	0	29	35	0	0	0	0	0	0	0	0	0	0	66	0	18	0	0	0	0	0	0	0	0
ASV_1717	Bacteria	Myxococcota	Polyangia	Polyangiales	Polyangiaceae	Pajaroellobacter	unclassified_Pajaroellobacter	0	0	0	0	0	0	0	0	42	0	27	69	10	0	0	0	0	0	0	0	0	0	0	0	0	0
ASV_1718	Bacteria	Proteobacteria	Alphaproteobacteria	Rhizobiales	Xanthobacteraceae	unclassified_Xanthobacteraceae	unclassified_Xanthobacteraceae	0	0	0	0	0	0	0	0	0	0	148	0	0	0	0	0	0	0	0	0	0	0	0	0	0	0
ASV_1719	Bacteria	Verrucomicrobiota	Verrucomicrobiae	Verrucomicrobiales	Verrucomicrobiaceae	unclassified_Verrucomicrobiaceae	unclassified_Verrucomicrobiaceae	0	0	0	0	0	0	0	0	0	0	0	18	65	65	0	0	0	0	0	0	0	0	0	0	0	0
ASV_1720	Bacteria	Proteobacteria	Gammaproteobacteria	Pseudomonadales	Cellvibrionaceae	Cellvibrio	diazotrophicus	31	0	116	0	0	0	0	0	0	0	0	0	0	0	0	0	0	0	0	0	0	0	0	0	0	0
ASV_1721	Bacteria	Cyanobacteria	Sericytochromatia	unclassified_Sericytochromatia	unclassified_Sericytochromatia	unclassified_Sericytochromatia	unclassified_Sericytochromatia	24	15	0	18	21	3	0	0	0	0	0	0	0	0	0	0	0	0	5	43	0	0	0	18	0	0
ASV_1722	Bacteria	Planctomycetota	Phycisphaerae	Tepidisphaerales	WD2101 soil group	unclassified_WD2101 soil group	unclassified_WD2101 soil group	11	0	0	0	33	0	77	0	0	0	0	0	0	0	0	0	0	26	0	0	0	0	0	0	0	0
ASV_1723	Bacteria	Bacteroidota	Bacteroidia	Cytophagales	Hymenobacteraceae	Hymenobacter	unclassified_Hymenobacter	0	0	0	106	0	0	0	0	0	0	0	0	0	0	0	41	0	0	0	0	0	0	0	0	0	0
ASV_1724	Bacteria	Acidobacteriota	Acidobacteriae	Solibacterales	Solibacteraceae	Candidatus Solibacter	unclassified_Candidatus Solibacter	0	0	0	33	0	0	0	0	30	13	0	16	0	0	0	0	55	0	0	0	0	0	0	0	0	0
ASV_1725	Bacteria	Proteobacteria	Alphaproteobacteria	Rhizobiales	unclassified_Rhizobiales	unclassified_Rhizobiales	unclassified_Rhizobiales	0	0	0	0	19	0	0	37	0	0	0	0	0	0	0	0	0	56	0	35	0	0	0	0	0	0
ASV_1726	Bacteria	Actinobacteriota	Rubrobacteria	Rubrobacterales	Rubrobacteriaceae	Rubrobacter	unclassified_Rubrobacter	0	0	0	0	0	0	0	0	0	0	0	0	0	0	0	53	0	94	0	0	0	0	0	0	0	0
ASV_1727	Bacteria	Acidobacteriota	Blastocatellia	Blastocatellales	Blastocatellaceae	Blastocatella	unclassified_Blastocatella	0	0	0	0	0	0	0	0	0	0	0	0	0	0	0	0	0	147	0	0	0	0	0	0	0	0
ASV_1728	Bacteria	Bacteroidota	Bacteroidia	Flavobacteriales	Flavobacteriaceae	unclassified_Flavobacteriaceae	unclassified_Flavobacteriaceae	0	0	0	0	0	0	0	0	0	0	0	0	0	0	0	0	0	0	0	0	100	0	47	0	0	0
ASV_1729	Bacteria	Acidobacteriota	Blastocatellia	Blastocatellales	Blastocatellaceae	Stenotrophobacter	unclassified_Stenotrophobacter	18	0	0	0	29	0	0	0	0	0	0	0	0	0	83	0	0	0	0	0	0	16	0	0	0	0
ASV_1730	Bacteria	Bacteroidota	Bacteroidia	Cytophagales	Cytophagaceae	Sporocytophaga	unclassified_Sporocytophaga	0	18	21	0	0	13	11	0	0	0	0	5	0	0	71	0	7	0	0	0	0	0	0	0	0	0
ASV_1731	Bacteria	Verrucomicrobiota	Verrucomicrobiae	Chthoniobacterales	Chthoniobacteraceae	Candidatus Udaeobacter	unclassified_Candidatus Udaeobacter	0	0	0	0	77	0	0	0	0	0	0	0	0	0	69	0	0	0	0	0	0	0	0	0	0	0
ASV_1732	Bacteria	Proteobacteria	Alphaproteobacteria	Rhizobiales	Rhodomicrobiaceae	Rhodomicrobium	unclassified_Rhodomicrobium	0	0	0	0	0	0	0	0	0	0	0	0	0	0	0	0	0	0	141	0	5	0	0	0	0	0
ASV_1733	Bacteria	Bacteroidota	Bacteroidia	Flavobacteriales	Flavobacteriaceae	Subsaxibacter	unclassified_Subsaxibacter	0	0	0	0	0	0	0	0	0	0	0	0	0	0	0	0	0	0	107	0	0	39	0	0	0	0
ASV_1734	Bacteria	Bacteroidota	Bacteroidia	Cytophagales	Cyclobacteriaceae	Lunatimonas	lonarensis	0	0	0	0	0	0	0	0	0	0	0	0	0	0	0	0	0	0	0	0	146	0	0	0	0	0
ASV_1735	Bacteria	Acidobacteriota	Blastocatellia	Blastocatellales	Blastocatellaceae	Blastocatella	unclassified_Blastocatella	0	0	0	0	0	0	0	0	0	0	0	0	0	0	0	0	0	0	0	0	0	0	0	146	0	0
ASV_1736	Bacteria	Planctomycetota	Planctomycetes	Gemmatales	Gemmataceae	Gemmata	unclassified_Gemmata	0	0	0	0	0	0	0	0	0	0	0	0	0	0	0	0	0	0	0	0	0	0	0	0	9	137
ASV_1737	Bacteria	Proteobacteria	Alphaproteobacteria	Rhodobacterales	Rhodobacteraceae	Amaricoccus	unclassified_Amaricoccus	15	11	21	25	23	22	0	0	0	0	0	0	0	0	0	0	28	0	0	0	0	0	0	0	0	0
ASV_1738	Bacteria	Actinobacteriota	Actinobacteria	Corynebacteriales	Nocardiaceae	Williamsia	unclassified_Williamsia	0	96	0	0	0	0	0	0	0	0	0	31	0	0	0	0	18	0	0	0	0	0	0	0	0	0
ASV_1739	Bacteria	Proteobacteria	Alphaproteobacteria	Rhodobacterales	Rhodobacteraceae	Profundibacterium	unclassified_Profundibacterium	0	0	0	14	0	0	0	0	0	0	0	0	0	0	0	0	0	0	108	0	0	23	0	0	0	0
ASV_1740	Bacteria	Acidobacteriota	Blastocatellia	Pyrinomonadales	Pyrinomonadaceae	RB41	unclassified_RB41	0	0	0	0	0	0	0	145	0	0	0	0	0	0	0	0	0	0	0	0	0	0	0	0	0	0
ASV_1741	Bacteria	Verrucomicrobiota	Chlamydiae	Chlamydiales	Parachlamydiaceae	unclassified_Parachlamydiaceae	unclassified_Parachlamydiaceae	0	0	0	0	0	0	0	0	0	0	0	0	129	0	0	0	16	0	0	0	0	0	0	0	0	0
ASV_1742	Bacteria	Acidobacteriota	Vicinamibacteria	Vicinamibacterales	Vicinamibacteraceae	Luteitalea	unclassified_Luteitalea	0	0	0	0	0	0	0	0	0	0	0	0	0	0	32	0	0	0	30	29	0	30	0	24	0	0
ASV_1743	Bacteria	Actinobacteriota	Rubrobacteria	Rubrobacterales	Rubrobacteriaceae	Rubrobacter	unclassified_Rubrobacter	0	0	0	0	0	0	0	0	0	0	0	0	0	0	0	0	0	145	0	0	0	0	0	0	0	0
ASV_1744	Bacteria	Proteobacteria	Gammaproteobacteria	Xanthomonadales	Xanthomonadaceae	Luteimonas	mephitis	0	0	0	0	0	0	0	0	0	0	0	0	0	0	0	0	0	0	96	49	0	0	0	0	0	0
ASV_1745	Bacteria	Actinobacteriota	Thermoleophilia	Gaiellales	Gaiellaceae	Gaiella	unclassified_Gaiella	0	0	0	0	0	0	0	0	0	0	0	0	0	0	0	0	0	0	0	145	0	0	0	0	0	0
ASV_1746	Bacteria	Gemmatimonadota	Longimicrobia	Longimicrobiales	Longimicrobiaceae	unclassified_Longimicrobiaceae	unclassified_Longimicrobiaceae	0	0	0	0	0	0	0	0	0	0	0	0	0	0	0	0	0	0	0	50	0	0	95	0	0	0
ASV_1747	Bacteria	Verrucomicrobiota	Chlamydiae	Chlamydiales	Parachlamydiaceae	unclassified_Parachlamydiaceae	unclassified_Parachlamydiaceae	4	0	0	14	0	6	0	4	0	0	0	0	0	0	19	0	0	11	0	39	16	18	0	13	0	0
ASV_1748	Bacteria	Bacteroidota	Bacteroidia	Sphingobacteriales	Sphingobacteriaceae	Pedobacter	unclassified_Pedobacter	0	0	0	87	0	0	0	0	0	0	0	0	0	0	33	0	0	24	0	0	0	0	0	0	0	0
ASV_1749	Bacteria	Actinobacteriota	Thermoleophilia	Solirubrobacterales	67-14	unclassified_67-14	unclassified_67-14	0	0	0	0	0	27	0	56	0	0	0	0	0	0	0	0	0	0	61	0	0	0	0	0	0	0
ASV_1750	Bacteria	Bacteroidota	Bacteroidia	Chitinophagales	Chitinophagaceae	Flavisolibacter	unclassified_Flavisolibacter	0	0	0	0	0	0	59	37	0	0	0	0	0	0	0	0	0	28	0	0	0	20	0	0	0	0
ASV_1751	Bacteria	Armatimonadota	unclassified_Armatimonadota	unclassified_Armatimonadota	unclassified_Armatimonadota	unclassified_Armatimonadota	unclassified_Armatimonadota	0	0	0	0	0	0	0	0	0	0	0	0	128	0	0	16	0	0	0	0	0	0	0	0	0	0
ASV_1752	Bacteria	Proteobacteria	Alphaproteobacteria	Puniceispirillales	unclassified_Puniceispirillales	unclassified_Puniceispirillales	unclassified_Puniceispirillales	0	0	0	0	0	0	0	0	0	0	0	0	0	0	0	0	0	0	0	0	144	0	0	0	0	0
ASV_1753	Bacteria	Proteobacteria	Gammaproteobacteria	Burkholderiales	Nitrosomonadaceae	Ellin6067	unclassified_Ellin6067	0	0	0	0	0	0	0	0	0	0	0	0	143	0	0	0	0	0	0	0	0	0	0	0	0	0
ASV_1754	Bacteria	Cyanobacteria	Cyanobacteriia	Phormidesmiales	Phormidesmiaceae	Phormidesmis ANT.LACV5.1	unclassified_Phormidesmis ANT.LACV5.1	0	0	0	0	0	0	0	0	0	0	0	0	0	0	143	0	0	0	0	0	0	0	0	0	0	0
ASV_1755	Bacteria	Bdellovibrionota	Oligoflexia	0319-6G20	unclassified_0319-6G20	unclassified_0319-6G20	unclassified_0319-6G20	89	0	0	0	40	13	0	0	0	0	0	0	0	0	0	0	0	0	0	0	0	0	0	0	0	0
ASV_1756	Bacteria	Gemmatimonadota	Gemmatimonadetes	Gemmatimonadales	Gemmatimonadaceae	Gemmatimonas	unclassified_Gemmatimonas	0	0	0	56	0	0	0	0	0	0	0	0	63	0	0	0	23	0	0	0	0	0	0	0	0	0
ASV_1757	Bacteria	Planctomycetota	Planctomycetes	Pirellulales	Pirellulaceae	unclassified_Pirellulaceae	unclassified_Pirellulaceae	0	0	0	45	0	0	0	0	0	0	0	0	0	0	19	0	78	0	0	0	0	0	0	0	0	0
ASV_1758	Bacteria	Planctomycetota	Planctomycetes	Isosphaerales	Isosphaeraceae	unclassified_Isosphaeraceae	unclassified_Isosphaeraceae	0	0	0	0	0	0	18	64	0	0	0	0	0	0	0	0	0	60	0	0	0	0	0	0	0	0
ASV_1759	Bacteria	Bacteroidota	Bacteroidia	Sphingobacteriales	Sphingobacteriaceae	Pedobacter	unclassified_Pedobacter	0	0	0	0	0	0	0	0	0	0	0	0	61	0	0	81	0	0	0	0	0	0	0	0	0	0
ASV_1760	Bacteria	Gemmatimonadota	Gemmatimonadetes	Gemmatimonadales	Gemmatimonadaceae	unclassified_Gemmatimonadaceae	unclassified_Gemmatimonadaceae	0	0	0	0	0	0	0	0	0	0	0	0	0	0	0	0	0	0	12	0	0	18	0	0	0	112
ASV_1761	Bacteria	Chloroflexi	Chloroflexia	Thermomicrobiales	JG30-KF-CM45	unclassified_JG30-KF-CM45	unclassified_JG30-KF-CM45	0	0	0	0	0	0	0	0	0	0	0	0	0	0	0	0	0	0	0	49	0	0	0	93	0	0
ASV_1762	Archaea	Crenarchaeota	Nitrososphaeria	Nitrososphaerales	Nitrososphaeraceae	unclassified_Nitrososphaeraceae	unclassified_Nitrososphaeraceae	0	0	0	0	0	0	0	0	0	0	0	0	0	0	0	0	0	0	0	0	0	0	0	0	0	142
ASV_1763	Bacteria	Proteobacteria	Alphaproteobacteria	Caulobacterales	Caulobacteraceae	Brevundimonas	subvibrioides	84	57	0	0	0	0	0	0	0	0	0	0	0	0	0	0	0	0	0	0	0	0	0	0	0	0
ASV_1764	Bacteria	Planctomycetota	Planctomycetes	Gemmatales	Gemmataceae	unclassified_Gemmataceae	unclassified_Gemmataceae	11	0	0	0	0	0	7	0	0	0	0	8	0	3	22	0	78	0	0	0	0	12	0	0	0	0
ASV_1765	Bacteria	Bacteroidota	Bacteroidia	Cytophagales	Cytophagaceae	Cytophaga	unclassified_Cytophaga	8	0	0	0	19	4	7	0	31	0	0	17	0	0	0	0	49	0	0	0	0	0	0	0	0	6
ASV_1766	Bacteria	Bdellovibrionota	Bdellovibrionia	Bacteriovoracales	Bacteriovoracaceae	Peredibacter	unclassified_Peredibacter	0	30	0	0	0	0	25	0	0	0	38	0	20	0	0	0	28	0	0	0	0	0	0	0	0	0
ASV_1768	Bacteria	Actinobacteriota	Thermoleophilia	Gaiellales	unclassified_Gaiellales	unclassified_Gaiellales	unclassified_Gaiellales	0	0	0	0	46	0	0	27	18	0	0	0	0	0	0	0	7	43	0	0	0	0	0	0	0	0
ASV_1769	Bacteria	Verrucomicrobiota	Verrucomicrobiae	Chthoniobacterales	Chthoniobacteraceae	Chthoniobacter	unclassified_Chthoniobacter	0	0	0	0	0	0	134	7	0	0	0	0	0	0	0	0	0	0	0	0	0	0	0	0	0	0
ASV_1770	Bacteria	Latescibacterota	unclassified_Latescibacterota	unclassified_Latescibacterota	unclassified_Latescibacterota	unclassified_Latescibacterota	unclassified_Latescibacterota	0	0	0	0	0	0	0	0	0	0	0	0	31	110	0	0	0	0	0	0	0	0	0	0	0	0
ASV_1771	Bacteria	Gemmatimonadota	Gemmatimonadetes	Gemmatimonadales	Gemmatimonadaceae	unclassified_Gemmatimonadaceae	unclassified_Gemmatimonadaceae	0	0	0	0	0	0	0	0	0	0	0	0	0	0	0	0	0	19	57	65	0	0	0	0	0	0
ASV_1772	Bacteria	unclassified_Bacteria	unclassified_Bacteria	unclassified_Bacteria	unclassified_Bacteria	unclassified_Bacteria	unclassified_Bacteria	55	9	0	33	33	0	3	0	0	0	0	0	0	0	0	0	7	0	0	0	0	0	0	0	0	0
ASV_1773	Bacteria	Actinobacteriota	Acidimicrobiia	Microtrichales	unclassified_Microtrichales	unclassified_Microtrichales	unclassified_Microtrichales	17	55	0	19	0	0	0	0	0	0	0	6	0	0	0	0	43	0	0	0	0	0	0	0	0	0
ASV_1774	Bacteria	Bacteroidota	Bacteroidia	Cytophagales	Spirosomaceae	Larkinella	unclassified_Larkinella	6	49	0	0	0	0	0	0	50	0	0	9	0	0	0	0	26	0	0	0	0	0	0	0	0	0
ASV_1775	Bacteria	Proteobacteria	Gammaproteobacteria	Xanthomonadales	Xanthomonadaceae	Thermomonas	unclassified_Thermomonas	0	81	0	0	0	0	0	0	0	0	16	43	0	0	0	0	0	0	0	0	0	0	0	0	0	0
ASV_1776	Bacteria	Chloroflexi	Chloroflexia	Chloroflexales	Herpetosiphonaceae	Herpetosiphon	unclassified_Herpetosiphon	0	0	35	0	0	0	44	46	0	0	0	0	0	0	0	0	0	15	0	0	0	0	0	0	0	0
ASV_1777	Bacteria	Chloroflexi	P2-11E	unclassified_P2-11E	unclassified_P2-11E	unclassified_P2-11E	unclassified_P2-11E	0	0	0	0	0	0	4	0	0	0	0	0	0	0	98	0	0	9	14	0	0	15	0	0	0	0
ASV_1778	Bacteria	Gemmatimonadota	Gemmatimonadetes	Gemmatimonadales	Gemmatimonadaceae	Gemmatimonas	unclassified_Gemmatimonas	23	52	0	64	0	0	0	0	0	0	0	0	0	0	0	0	0	0	0	0	0	0	0	0	0	0
ASV_1779	Bacteria	Planctomycetota	Planctomycetes	Isosphaerales	Isosphaeraceae	Isosphaera	unclassified_Isosphaera	14	0	10	0	0	0	9	0	0	0	0	0	0	0	11	0	0	18	10	9	0	36	0	0	0	22
ASV_1780	Bacteria	Actinobacteriota	Thermoleophilia	Solirubrobacterales	67-14	unclassified_67-14	unclassified_67-14	13	0	0	0	23	0	0	64	30	0	0	0	0	0	0	0	9	0	0	0	0	0	0	0	0	0
ASV_1781	Bacteria	Patescibacteria	Gracilibacteria	Candidatus Peribacteria	unclassified_Candidatus Peribacteria	unclassified_Candidatus Peribacteria	unclassified_Candidatus Peribacteria	4	22	3	0	0	0	0	3	0	0	0	0	0	0	0	0	107	0	0	0	0	0	0	0	0	0
ASV_1782	Bacteria	Proteobacteria	Alphaproteobacteria	Rhodobacterales	Rhodobacteraceae	Amaricoccus	unclassified_Amaricoccus	0	0	0	0	16	0	49	74	0	0	0	0	0	0	0	0	0	0	0	0	0	0	0	0	0	0
ASV_1783	Bacteria	Bacteroidota	Bacteroidia	Chitinophagales	Chitinophagaceae	Edaphobaculum	unclassified_Edaphobaculum	0	0	0	0	10	0	24	33	0	0	0	0	0	0	0	11	0	38	0	0	0	14	0	9	0	0
ASV_1784	Bacteria	Bacteroidota	Bacteroidia	Sphingobacteriales	Sphingobacteriaceae	unclassified_Sphingobacteriaceae	unclassified_Sphingobacteriaceae	0	0	0	0	0	9	0	0	0	0	0	0	97	0	33	0	0	0	0	0	0	0	0	0	0	0
ASV_1785	Bacteria	Proteobacteria	Gammaproteobacteria	Nitrosococcales	Nitrosococcaceae	wb1-P19	unclassified_wb1-P19	0	0	0	0	0	0	0	0	0	0	0	0	0	0	139	0	0	0	0	0	0	0	0	0	0	0
ASV_1786	Bacteria	Actinobacteriota	Thermoleophilia	Gaiellales	unclassified_Gaiellales	unclassified_Gaiellales	unclassified_Gaiellales	0	0	0	0	0	0	0	0	0	0	0	0	0	0	0	0	0	0	0	0	0	139	0	0	0	0
ASV_1787	Bacteria	Bdellovibrionota	Bdellovibrionia	Bacteriovoracales	Bacteriovoracaceae	Peredibacter	unclassified_Peredibacter	44	0	0	0	84	10	0	0	0	0	0	0	0	0	0	0	0	0	0	0	0	0	0	0	0	0
ASV_1788	Bacteria	Bdellovibrionota	Oligoflexia	0319-6G20	unclassified_0319-6G20	unclassified_0319-6G20	unclassified_0319-6G20	23	53	0	0	0	0	0	15	0	0	0	0	0	0	0	0	39	8	0	0	0	0	0	0	0	0
ASV_1789	Bacteria	Chloroflexi	Chloroflexia	Thermomicrobiales	JG30-KF-CM45	unclassified_JG30-KF-CM45	unclassified_JG30-KF-CM45	0	0	17	0	0	19	39	39	0	0	0	0	0	0	0	0	0	0	24	0	0	0	0	0	0	0
ASV_1790	Bacteria	Planctomycetota	Phycisphaerae	Tepidisphaerales	WD2101 soil group	unclassified_WD2101 soil group	unclassified_WD2101 soil group	0	0	0	0	55	0	46	27	0	0	0	0	0	0	0	0	0	10	0	0	0	0	0	0	0	0
ASV_1791	Bacteria	Proteobacteria	Alphaproteobacteria	Sphingomonadales	Sphingomonadaceae	Novosphingobium	unclassified_Novosphingobium	0	0	0	0	40	24	0	40	0	0	0	0	0	0	0	0	0	0	20	0	0	14	0	0	0	0
ASV_1792	Bacteria	Armatimonadota	Chthonomonadetes	Chthonomonadales	Chthonomonadaceae	Chthonomonas	unclassified_Chthonomonas	0	0	0	0	6	0	0	0	18	0	0	75	12	22	0	0	0	0	0	0	0	0	0	0	0	5
ASV_1793	Bacteria	Actinobacteriota	Thermoleophilia	Solirubrobacterales	67-14	unclassified_67-14	unclassified_67-14	0	0	0	0	0	0	0	20	0	0	0	0	0	0	0	0	0	0	101	8	0	9	0	0	0	0
ASV_1794	Bacteria	Proteobacteria	Gammaproteobacteria	Diplorickettsiales	Diplorickettsiaceae	unclassified_Diplorickettsiaceae	unclassified_Diplorickettsiaceae	0	0	0	0	0	0	0	0	22	0	2	0	17	0	0	0	97	0	0	0	0	0	0	0	0	0
ASV_1795	Bacteria	Proteobacteria	Gammaproteobacteria	Burkholderiales	Nitrosomonadaceae	Nitrosomonas	unclassified_Nitrosomonas	0	0	0	0	0	0	0	0	0	0	0	0	118	0	12	0	8	0	0	0	0	0	0	0	0	0
ASV_1796	Bacteria	Actinobacteriota	Thermoleophilia	Gaiellales	Gaiellaceae	Gaiella	unclassified_Gaiella	0	0	0	0	0	0	0	0	0	0	0	0	59	0	0	0	0	0	0	0	0	0	0	0	0	79
ASV_1797	Bacteria	Bacteroidota	Bacteroidia	Chitinophagales	Chitinophagaceae	Flavitalea	unclassified_Flavitalea	0	0	0	0	0	0	0	0	0	0	0	0	43	0	0	0	0	0	0	0	0	0	0	0	0	95
ASV_1798	Bacteria	Chloroflexi	Chloroflexia	Thermomicrobiales	JG30-KF-CM45	unclassified_JG30-KF-CM45	unclassified_JG30-KF-CM45	0	0	0	0	0	0	0	0	0	0	0	0	0	0	0	0	0	0	0	0	0	78	0	0	0	60
ASV_1799	Bacteria	Proteobacteria	Alphaproteobacteria	Tistrellales	Geminicoccaceae	unclassified_Geminicoccaceae	unclassified_Geminicoccaceae	0	0	0	0	0	0	0	0	0	0	0	0	0	0	0	0	0	0	0	0	0	0	138	0	0	0
ASV_1800	Bacteria	Planctomycetota	Planctomycetes	Isosphaerales	Isosphaeraceae	unclassified_Isosphaeraceae	unclassified_Isosphaeraceae	29	30	0	0	0	0	0	0	4	0	0	11	24	8	0	0	31	0	0	0	0	0	0	0	0	0
ASV_1801	Bacteria	Proteobacteria	Gammaproteobacteria	Burkholderiales	Comamonadaceae	Polaromonas	unclassified_Polaromonas	19	0	57	0	0	0	19	0	0	0	0	0	0	42	0	0	0	0	0	0	0	0	0	0	0	0
ASV_1802	Bacteria	Actinobacteriota	Acidimicrobiia	IMCC26256	unclassified_IMCC26256	unclassified_IMCC26256	unclassified_IMCC26256	7	0	9	0	13	0	5	0	5	0	0	0	0	0	22	54	5	9	0	0	0	8	0	0	0	0
ASV_1803	Bacteria	Proteobacteria	Gammaproteobacteria	Burkholderiales	Comamonadaceae	unclassified_Comamonadaceae	unclassified_Comamonadaceae	0	0	0	40	0	0	22	0	0	0	0	0	0	0	59	0	0	0	16	0	0	0	0	0	0	0
ASV_1804	Bacteria	Actinobacteriota	Thermoleophilia	Gaiellales	Gaiellaceae	Gaiella	unclassified_Gaiella	0	0	0	0	0	0	0	0	0	0	0	0	0	0	17	120	0	0	0	0	0	0	0	0	0	0
ASV_1805	Bacteria	Actinobacteriota	Actinobacteria	Micromonosporales	Micromonosporaceae	Actinoplanes	unclassified_Actinoplanes	57	79	0	0	0	0	0	0	0	0	0	0	0	0	0	0	0	0	0	0	0	0	0	0	0	0
ASV_1806	Bacteria	Bacteroidota	Bacteroidia	Sphingobacteriales	env.OPS 17	unclassified_env.OPS 17	unclassified_env.OPS 17	0	0	16	0	0	0	0	20	0	0	0	0	11	0	14	17	8	20	0	15	0	10	0	0	5	0
ASV_1807	Bacteria	Verrucomicrobiota	Verrucomicrobiae	Chthoniobacterales	Chthoniobacteraceae	Chthoniobacter	unclassified_Chthoniobacter	0	0	0	20	9	0	0	0	35	0	0	59	13	0	0	0	0	0	0	0	0	0	0	0	0	0
ASV_1808	Bacteria	Actinobacteriota	Rubrobacteria	Rubrobacterales	Rubrobacteriaceae	Rubrobacter	unclassified_Rubrobacter	0	0	0	0	0	66	0	70	0	0	0	0	0	0	0	0	0	0	0	0	0	0	0	0	0	0
ASV_1809	Bacteria	Verrucomicrobiota	Chlamydiae	Chlamydiales	Parachlamydiaceae	Neochlamydia	unclassified_Neochlamydia	0	0	0	0	0	0	0	0	6	0	0	0	111	19	0	0	0	0	0	0	0	0	0	0	0	0
ASV_1810	Bacteria	Proteobacteria	Gammaproteobacteria	Burkholderiales	Comamonadaceae	unclassified_Comamonadaceae	unclassified_Comamonadaceae	0	0	0	0	0	0	0	0	0	0	136	0	0	0	0	0	0	0	0	0	0	0	0	0	0	0
ASV_1811	Bacteria	Gemmatimonadota	Gemmatimonadetes	Gemmatimonadales	Gemmatimonadaceae	unclassified_Gemmatimonadaceae	unclassified_Gemmatimonadaceae	0	0	0	0	0	0	0	0	0	0	0	0	0	0	0	0	0	13	8	36	0	79	0	0	0	0
ASV_1812	Bacteria	Planctomycetota	Planctomycetes	Gemmatales	Gemmataceae	unclassified_Gemmataceae	unclassified_Gemmataceae	0	0	0	0	0	0	0	0	0	0	0	0	0	0	0	0	0	0	0	0	129	0	7	0	0	0
ASV_1813	Bacteria	Bacteroidota	Ignavibacteria	SJA-28	unclassified_SJA-28	unclassified_SJA-28	unclassified_SJA-28	0	0	0	0	0	0	0	0	0	0	0	0	0	0	0	0	0	0	0	0	0	0	0	0	0	136
ASV_1814	Bacteria	Proteobacteria	Alphaproteobacteria	Rhizobiales	Rhizobiales Incertae Sedis	unclassified_Rhizobiales Incertae Sedis	unclassified_Rhizobiales Incertae Sedis	31	0	0	32	20	0	0	0	0	0	0	0	0	0	0	20	32	0	0	0	0	0	0	0	0	0
ASV_1815	Bacteria	Myxococcota	Polyangia	Haliangiales	Haliangiaceae	Haliangium	unclassified_Haliangium	20	0	0	0	13	0	24	27	0	0	0	0	0	0	0	0	36	8	0	0	0	7	0	0	0	0
ASV_1816	Bacteria	Proteobacteria	Gammaproteobacteria	Xanthomonadales	Xanthomonadaceae	Luteimonas	unclassified_Luteimonas	0	26	0	0	42	0	0	44	0	0	0	0	0	0	0	0	23	0	0	0	0	0	0	0	0	0
ASV_1817	Bacteria	Proteobacteria	Gammaproteobacteria	Nitrosococcales	Nitrosococcaceae	wb1-P19	unclassified_wb1-P19	0	0	0	0	0	0	95	0	0	0	0	0	0	0	40	0	0	0	0	0	0	0	0	0	0	0
ASV_1818	Bacteria	Abditibacteriota	Abditibacteria	Abditibacteriales	Abditibacteriaceae	Abditibacterium	unclassified_Abditibacterium	0	0	0	0	0	0	0	23	0	0	0	0	0	0	0	0	0	0	0	0	0	0	0	112	0	0
ASV_1819	Bacteria	Actinobacteriota	Actinobacteria	Euzebyales	Euzebyaceae	unclassified_Euzebyaceae	unclassified_Euzebyaceae	0	0	0	0	0	0	0	0	71	5	0	4	0	0	0	0	17	34	0	0	0	0	0	0	4	0
ASV_1820	Bacteria	Proteobacteria	Alphaproteobacteria	Rhizobiales	Rhizobiales Incertae Sedis	Bauldia	unclassified_Bauldia	0	0	0	0	0	0	0	0	0	0	0	32	67	22	0	0	14	0	0	0	0	0	0	0	0	0
ASV_1821	Bacteria	Bacteroidota	Bacteroidia	Chitinophagales	Chitinophagaceae	Ferruginibacter	unclassified_Ferruginibacter	0	0	0	0	0	0	0	0	0	0	0	1	2	4	128	0	0	0	0	0	0	0	0	0	0	0
ASV_1822	Bacteria	Bacteroidota	Bacteroidia	Chitinophagales	Chitinophagaceae	Edaphobaculum	unclassified_Edaphobaculum	0	0	0	0	0	0	0	0	0	0	0	0	0	0	0	135	0	0	0	0	0	0	0	0	0	0
ASV_1823	Bacteria	Actinobacteriota	Acidimicrobiia	IMCC26256	unclassified_IMCC26256	unclassified_IMCC26256	unclassified_IMCC26256	0	0	0	0	0	0	0	0	0	0	0	0	0	0	0	0	0	0	114	0	0	21	0	0	0	0
ASV_1824	Bacteria	Myxococcota	Polyangia	Polyangiales	Sandaracinaceae	unclassified_Sandaracinaceae	unclassified_Sandaracinaceae	14	14	39	33	0	0	22	0	0	0	0	0	0	0	12	0	0	0	0	0	0	0	0	0	0	0
ASV_1825	Bacteria	Chloroflexi	Chloroflexia	Thermomicrobiales	JG30-KF-CM45	unclassified_JG30-KF-CM45	unclassified_JG30-KF-CM45	0	0	0	58	0	0	0	0	0	0	0	0	0	0	0	26	50	0	0	0	0	0	0	0	0	0
ASV_1826	Bacteria	Myxococcota	Polyangia	Polyangiales	BIrii41	unclassified_BIrii41	unclassified_BIrii41	0	0	0	14	13	0	0	0	0	0	0	0	0	0	20	46	41	0	0	0	0	0	0	0	0	0
ASV_1827	Bacteria	Acidobacteriota	Vicinamibacteria	Vicinamibacterales	unclassified_Vicinamibacterales	unclassified_Vicinamibacterales	unclassified_Vicinamibacterales	0	0	0	0	24	0	0	9	0	0	0	0	0	0	0	0	0	20	39	0	0	42	0	0	0	0
ASV_1828	Bacteria	Proteobacteria	Alphaproteobacteria	Rhizobiales	Rhizobiales Incertae Sedis	Bauldia	unclassified_Bauldia	0	0	0	0	0	0	0	0	0	0	0	45	0	58	0	0	0	0	0	0	0	0	0	0	0	31
ASV_1829	Bacteria	Proteobacteria	Gammaproteobacteria	Xanthomonadales	Rhodanobacteraceae	unclassified_Rhodanobacteraceae	unclassified_Rhodanobacteraceae	0	0	0	0	0	0	0	0	0	0	0	0	0	0	134	0	0	0	0	0	0	0	0	0	0	0
ASV_1830	Bacteria	Actinobacteriota	Thermoleophilia	Solirubrobacterales	Solirubrobacteraceae	Solirubrobacter	unclassified_Solirubrobacter	0	0	0	0	0	0	0	0	0	0	0	0	0	0	29	0	0	0	21	0	0	84	0	0	0	0
ASV_1831	Bacteria	Abditibacteriota	Abditibacteria	Abditibacteriales	Abditibacteriaceae	Abditibacterium	unclassified_Abditibacterium	0	0	0	0	0	0	0	0	0	0	0	0	0	0	16	118	0	0	0	0	0	0	0	0	0	0
ASV_1832	Bacteria	Armatimonadota	Fimbriimonadia	Fimbriimonadales	Fimbriimonadaceae	unclassified_Fimbriimonadaceae	unclassified_Fimbriimonadaceae	0	0	0	0	0	0	0	0	0	0	0	0	0	0	0	0	0	0	0	5	129	0	0	0	0	0
ASV_1833	Bacteria	Gemmatimonadota	S0134 terrestrial group	unclassified_S0134 terrestrial group	unclassified_S0134 terrestrial group	unclassified_S0134 terrestrial group	unclassified_S0134 terrestrial group	0	0	0	0	0	0	0	0	0	0	0	0	0	0	0	0	0	0	0	0	0	0	0	0	0	134
ASV_1834	Bacteria	Planctomycetota	Phycisphaerae	Tepidisphaerales	WD2101 soil group	unclassified_WD2101 soil group	unclassified_WD2101 soil group	0	17	0	15	0	0	0	0	0	0	0	0	0	0	0	12	89	0	0	0	0	0	0	0	0	0
ASV_1835	Bacteria	Cyanobacteria	Cyanobacteriia	Cyanobacteriales	Nostocaceae	Nostoc PCC-73102	unclassified_Nostoc PCC-73102	0	0	133	0	0	0	0	0	0	0	0	0	0	0	0	0	0	0	0	0	0	0	0	0	0	0
ASV_1836	Bacteria	Patescibacteria	Parcubacteria	Candidatus Moranbacteria	unclassified_Candidatus Moranbacteria	unclassified_Candidatus Moranbacteria	unclassified_Candidatus Moranbacteria	0	0	122	0	0	0	0	6	0	0	0	0	0	0	0	0	0	0	0	5	0	0	0	0	0	0
ASV_1837	Bacteria	Actinobacteriota	Acidimicrobiia	unclassified_Acidimicrobiia	unclassified_Acidimicrobiia	unclassified_Acidimicrobiia	unclassified_Acidimicrobiia	0	0	0	0	17	0	0	0	0	0	0	0	0	0	63	17	0	12	0	24	0	0	0	0	0	0
ASV_1838	Bacteria	Planctomycetota	Planctomycetes	Planctomycetales	Rubinisphaeraceae	unclassified_Rubinisphaeraceae	unclassified_Rubinisphaeraceae	0	0	0	0	8	0	19	27	0	0	0	0	0	0	43	0	0	0	0	0	0	36	0	0	0	0
ASV_1839	Bacteria	Proteobacteria	Alphaproteobacteria	Rhizobiales	unclassified_Rhizobiales	unclassified_Rhizobiales	unclassified_Rhizobiales	0	0	0	0	0	0	60	33	0	0	0	0	0	0	0	0	0	40	0	0	0	0	0	0	0	0
ASV_1840	Bacteria	Bdellovibrionota	Bdellovibrionia	Bdellovibrionales	Bdellovibrionaceae	Bdellovibrio	unclassified_Bdellovibrio	0	0	0	0	0	0	0	0	105	0	28	0	0	0	0	0	0	0	0	0	0	0	0	0	0	0
ASV_1841	Bacteria	Actinobacteriota	Thermoleophilia	Solirubrobacterales	67-14	unclassified_67-14	unclassified_67-14	0	0	0	0	0	0	0	0	0	0	0	0	0	0	0	0	0	0	21	34	31	7	8	32	0	0
ASV_1842	Bacteria	Chloroflexi	Dehalococcoidia	SAR202 clade	unclassified_SAR202 clade	unclassified_SAR202 clade	unclassified_SAR202 clade	0	0	0	0	0	0	0	0	0	0	0	0	0	0	0	0	0	0	0	0	0	0	133	0	0	0
ASV_1843	Bacteria	Proteobacteria	Gammaproteobacteria	Burkholderiales	Nitrosomonadaceae	MND1	unclassified_MND1	0	0	0	0	0	0	0	0	0	0	0	0	0	0	0	0	0	0	0	0	0	0	0	0	15	118
ASV_1844	Bacteria	Bacteroidota	Bacteroidia	Chitinophagales	Chitinophagaceae	Segetibacter	unclassified_Segetibacter	32	0	60	0	0	13	0	0	0	0	0	0	0	0	0	0	27	0	0	0	0	0	0	0	0	0
ASV_1845	Bacteria	Acidobacteriota	Blastocatellia	Blastocatellales	Blastocatellaceae	Blastocatella	unclassified_Blastocatella	19	11	0	0	17	0	44	20	0	0	0	0	0	0	0	0	21	0	0	0	0	0	0	0	0	0
ASV_1846	Bacteria	Chloroflexi	Chloroflexia	Thermomicrobiales	JG30-KF-CM45	unclassified_JG30-KF-CM45	unclassified_JG30-KF-CM45	0	0	0	0	16	25	0	49	0	0	0	0	0	0	0	13	13	0	0	6	0	0	0	10	0	0
ASV_1847	Bacteria	Acidobacteriota	Blastocatellia	Blastocatellales	Blastocatellaceae	unclassified_Blastocatellaceae	unclassified_Blastocatellaceae	0	0	0	0	0	0	0	0	0	0	0	0	0	0	75	11	46	0	0	0	0	0	0	0	0	0
ASV_1848	Bacteria	Bacteroidota	Bacteroidia	Chitinophagales	Chitinophagaceae	Ferruginibacter	unclassified_Ferruginibacter	40	0	0	0	0	0	28	42	0	0	0	0	0	0	0	0	0	21	0	0	0	0	0	0	0	0
ASV_1849	Bacteria	Proteobacteria	Alphaproteobacteria	Rhizobiales	Beijerinckiaceae	Psychroglaciecola	arctica	9	0	0	48	63	11	0	0	0	0	0	0	0	0	0	0	0	0	0	0	0	0	0	0	0	0
ASV_1850	Bacteria	Bacteroidota	Bacteroidia	Flavobacteriales	Flavobacteriaceae	Flavobacterium	unclassified_Flavobacterium	0	23	0	92	0	0	0	0	0	0	0	0	16	0	0	0	0	0	0	0	0	0	0	0	0	0
ASV_1851	Bacteria	Proteobacteria	Alphaproteobacteria	Rhizobiales	Beijerinckiaceae	unclassified_Beijerinckiaceae	unclassified_Beijerinckiaceae	0	0	23	0	24	0	0	0	0	0	0	0	0	0	0	45	8	22	0	0	0	9	0	0	0	0
ASV_1852	Bacteria	Proteobacteria	Alphaproteobacteria	Rickettsiales	AB1	unclassified_AB1	unclassified_AB1	0	0	0	131	0	0	0	0	0	0	0	0	0	0	0	0	0	0	0	0	0	0	0	0	0	0
ASV_1853	Bacteria	Bdellovibrionota	Bdellovibrionia	Bacteriovoracales	Bacteriovoracaceae	Peredibacter	unclassified_Peredibacter	0	0	0	32	42	0	13	0	0	0	0	0	0	0	0	0	0	0	0	0	44	0	0	0	0	0
ASV_1854	Bacteria	Actinobacteriota	Acidimicrobiia	Microtrichales	Iamiaceae	Iamia	unclassified_Iamia	0	0	0	0	18	0	0	0	42	0	0	0	0	0	0	0	0	43	0	0	0	0	0	0	0	28
ASV_1855	Bacteria	Bacteroidota	Bacteroidia	Chitinophagales	Chitinophagaceae	Sediminibacterium	unclassified_Sediminibacterium	0	0	0	0	0	0	0	0	131	0	0	0	0	0	0	0	0	0	0	0	0	0	0	0	0	0
ASV_1856	Bacteria	Bacteroidota	Bacteroidia	Sphingobacteriales	Sphingobacteriaceae	Pedobacter	boryungensis	0	0	0	0	0	0	0	0	90	0	0	28	0	0	0	0	13	0	0	0	0	0	0	0	0	0
ASV_1857	Bacteria	Actinobacteriota	Acidimicrobiia	unclassified_Acidimicrobiia	unclassified_Acidimicrobiia	unclassified_Acidimicrobiia	unclassified_Acidimicrobiia	0	0	0	0	0	0	0	0	0	0	0	0	0	0	0	86	0	0	45	0	0	0	0	0	0	0
ASV_1858	Bacteria	Acidobacteriota	Acidobacteriae	Bryobacterales	Bryobacteraceae	Bryobacter	unclassified_Bryobacter	0	0	0	0	0	0	0	0	0	0	0	0	0	0	0	0	0	24	0	0	0	107	0	0	0	0
ASV_1859	Bacteria	Bacteroidota	Bacteroidia	Sphingobacteriales	unclassified_Sphingobacteriales	unclassified_Sphingobacteriales	unclassified_Sphingobacteriales	0	0	18	0	16	0	15	38	0	0	0	0	0	0	43	0	0	0	0	0	0	0	0	0	0	0
ASV_1860	Bacteria	Chloroflexi	OLB14	unclassified_OLB14	unclassified_OLB14	unclassified_OLB14	unclassified_OLB14	0	0	5	0	0	0	0	0	0	0	0	0	0	0	9	0	0	0	49	0	0	67	0	0	0	0
ASV_1861	Bacteria	unclassified_Bacteria	unclassified_Bacteria	unclassified_Bacteria	unclassified_Bacteria	unclassified_Bacteria	unclassified_Bacteria	0	0	0	6	0	0	0	0	26	0	0	18	10	0	0	0	70	0	0	0	0	0	0	0	0	0
ASV_1862	Bacteria	Bacteroidota	Bacteroidia	Cytophagales	Microscillaceae	unclassified_Microscillaceae	unclassified_Microscillaceae	0	0	0	0	0	0	6	0	0	0	0	0	0	0	0	0	0	14	90	0	8	12	0	0	0	0
ASV_1863	Bacteria	Chloroflexi	Gitt-GS-136	unclassified_Gitt-GS-136	unclassified_Gitt-GS-136	unclassified_Gitt-GS-136	unclassified_Gitt-GS-136	0	0	0	0	0	0	0	0	0	0	0	0	0	0	0	53	0	0	0	0	0	77	0	0	0	0
ASV_1864	Bacteria	Bacteroidota	Bacteroidia	Chitinophagales	Chitinophagaceae	Segetibacter	unclassified_Segetibacter	0	0	0	0	0	0	0	0	0	0	0	0	0	0	0	0	0	0	0	130	0	0	0	0	0	0
ASV_1865	Bacteria	Bacteroidota	Bacteroidia	Sphingobacteriales	LiUU-11-161	unclassified_LiUU-11-161	unclassified_LiUU-11-161	0	0	0	0	0	0	0	0	0	0	0	0	0	0	0	0	0	0	0	0	0	0	130	0	0	0
ASV_1866	Bacteria	Proteobacteria	Gammaproteobacteria	Xanthomonadales	Xanthomonadaceae	Thermomonas	unclassified_Thermomonas	43	0	0	0	0	38	0	0	0	0	0	0	0	0	48	0	0	0	0	0	0	0	0	0	0	0
ASV_1868	Bacteria	Bacteroidota	Bacteroidia	Sphingobacteriales	env.OPS 17	unclassified_env.OPS 17	unclassified_env.OPS 17	0	10	36	15	0	0	0	34	0	0	0	0	0	0	0	34	0	0	0	0	0	0	0	0	0	0
ASV_1869	Bacteria	Actinobacteriota	Actinobacteria	Propionibacteriales	Nocardioidaceae	Nocardioides	unclassified_Nocardioides	0	0	0	0	52	28	29	0	0	0	0	0	0	0	20	0	0	0	0	0	0	0	0	0	0	0
ASV_1870	Bacteria	Actinobacteriota	Thermoleophilia	Solirubrobacterales	67-14	unclassified_67-14	unclassified_67-14	0	0	0	0	0	0	51	47	0	0	0	0	0	0	0	0	0	31	0	0	0	0	0	0	0	0
ASV_1871	Bacteria	Actinobacteriota	Thermoleophilia	Solirubrobacterales	67-14	unclassified_67-14	unclassified_67-14	0	0	0	0	0	0	11	36	0	0	0	0	0	0	0	56	0	0	26	0	0	0	0	0	0	0
ASV_1872	Bacteria	Acidobacteriota	Blastocatellia	Blastocatellales	Blastocatellaceae	JGI 0001001-H03	unclassified_JGI 0001001-H03	0	0	0	0	0	0	0	52	0	0	0	0	0	0	0	0	0	0	0	0	0	77	0	0	0	0
ASV_1873	Bacteria	Gemmatimonadota	Gemmatimonadetes	Gemmatimonadales	Gemmatimonadaceae	Gemmatimonas	unclassified_Gemmatimonas	0	0	0	0	0	0	0	0	129	0	0	0	0	0	0	0	0	0	0	0	0	0	0	0	0	0
ASV_1874	Bacteria	Planctomycetota	Planctomycetes	Pirellulales	Pirellulaceae	Pirellula	unclassified_Pirellula	0	0	0	0	0	0	0	0	0	0	0	0	12	0	0	0	0	0	0	0	0	0	0	0	6	111
ASV_1875	Bacteria	Actinobacteriota	Acidimicrobiia	unclassified_Acidimicrobiia	unclassified_Acidimicrobiia	unclassified_Acidimicrobiia	unclassified_Acidimicrobiia	0	0	0	0	0	0	0	0	0	0	0	0	0	0	60	61	0	0	0	0	0	8	0	0	0	0
ASV_1876	Bacteria	Acidobacteriota	Acidobacteriae	Solibacterales	Solibacteraceae	Candidatus Solibacter	unclassified_Candidatus Solibacter	0	0	0	0	0	0	0	0	0	0	0	0	0	0	0	0	0	0	0	0	0	0	0	0	0	129
ASV_1877	Bacteria	Bacteroidota	Bacteroidia	Flavobacteriales	Weeksellaceae	unclassified_Weeksellaceae	unclassified_Weeksellaceae	46	19	0	10	0	20	13	2	0	0	0	0	0	0	0	0	18	0	0	0	0	0	0	0	0	0
ASV_1878	Bacteria	Proteobacteria	Alphaproteobacteria	Paracaedibacterales	Paracaedibacteraceae	Candidatus Paracaedibacter	symbiosus	0	0	0	19	0	3	0	0	0	0	0	0	0	0	0	106	0	0	0	0	0	0	0	0	0	0
ASV_1879	Bacteria	Actinobacteriota	Actinobacteria	Frankiales	Sporichthyaceae	unclassified_Sporichthyaceae	unclassified_Sporichthyaceae	0	0	0	0	58	0	0	23	14	0	0	0	0	0	0	0	33	0	0	0	0	0	0	0	0	0
ASV_1880	Bacteria	Proteobacteria	Alphaproteobacteria	Rhizobiales	Xanthobacteraceae	Afipia	unclassified_Afipia	0	0	0	0	0	0	0	0	0	0	38	90	0	0	0	0	0	0	0	0	0	0	0	0	0	0
ASV_1881	Bacteria	Proteobacteria	Gammaproteobacteria	Burkholderiales	Comamonadaceae	Rhodoferax	unclassified_Rhodoferax	0	0	0	0	0	0	0	0	0	0	0	0	128	0	0	0	0	0	0	0	0	0	0	0	0	0
ASV_1882	Bacteria	Verrucomicrobiota	Chlamydiae	Chlamydiales	Parachlamydiaceae	unclassified_Parachlamydiaceae	unclassified_Parachlamydiaceae	0	0	0	0	0	0	0	0	0	0	0	0	128	0	0	0	0	0	0	0	0	0	0	0	0	0
ASV_1883	Bacteria	Planctomycetota	Phycisphaerae	Tepidisphaerales	WD2101 soil group	unclassified_WD2101 soil group	unclassified_WD2101 soil group	7	0	19	0	0	0	9	0	0	0	0	0	0	0	0	0	38	54	0	0	0	0	0	0	0	0
ASV_1884	Bacteria	Planctomycetota	Phycisphaerae	Tepidisphaerales	WD2101 soil group	unclassified_WD2101 soil group	unclassified_WD2101 soil group	0	0	0	0	12	0	0	0	0	0	0	10	16	0	0	11	72	0	0	0	0	6	0	0	0	0
ASV_1885	Bacteria	Bacteroidota	Bacteroidia	Chitinophagales	Chitinophagaceae	Ferruginibacter	unclassified_Ferruginibacter	0	0	0	0	0	0	101	26	0	0	0	0	0	0	0	0	0	0	0	0	0	0	0	0	0	0
ASV_1886	Bacteria	Chloroflexi	KD4-96	unclassified_KD4-96	unclassified_KD4-96	unclassified_KD4-96	unclassified_KD4-96	0	0	0	0	0	0	26	17	0	0	0	0	0	0	0	0	84	0	0	0	0	0	0	0	0	0
ASV_1887	Bacteria	Chloroflexi	Chloroflexia	Thermomicrobiales	JG30-KF-CM45	unclassified_JG30-KF-CM45	unclassified_JG30-KF-CM45	0	0	0	0	0	0	0	39	0	0	0	0	0	0	58	0	0	30	0	0	0	0	0	0	0	0
ASV_1888	Bacteria	Actinobacteriota	Actinobacteria	Frankiales	unclassified_Frankiales	unclassified_Frankiales	unclassified_Frankiales	0	0	0	0	0	0	0	0	0	0	0	0	127	0	0	0	0	0	0	0	0	0	0	0	0	0
ASV_1889	Bacteria	Chloroflexi	Dehalococcoidia	S085	unclassified_S085	unclassified_S085	unclassified_S085	0	0	0	0	0	0	0	0	0	0	0	0	0	3	0	0	0	0	0	0	0	81	0	0	0	43
ASV_1890	Bacteria	Actinobacteriota	Acidimicrobiia	Microtrichales	Ilumatobacteraceae	unclassified_Ilumatobacteraceae	unclassified_Ilumatobacteraceae	0	0	0	0	0	0	0	0	0	0	0	0	0	0	49	63	0	0	0	0	0	15	0	0	0	0
ASV_1891	Bacteria	Proteobacteria	Gammaproteobacteria	Diplorickettsiales	Diplorickettsiaceae	Aquicella	unclassified_Aquicella	0	0	0	0	0	0	0	0	0	0	0	0	0	0	0	0	127	0	0	0	0	0	0	0	0	0
ASV_1892	Bacteria	Actinobacteriota	Actinobacteria	Pseudonocardiales	Pseudonocardiaceae	Pseudonocardia	unclassified_Pseudonocardia	0	0	0	0	0	0	0	0	0	0	0	0	0	0	0	0	0	127	0	0	0	0	0	0	0	0
ASV_1893	Bacteria	Chloroflexi	Anaerolineae	RBG-13-54-9	unclassified_RBG-13-54-9	unclassified_RBG-13-54-9	unclassified_RBG-13-54-9	0	0	0	0	0	0	0	0	0	0	0	0	0	0	0	0	0	0	6	0	0	121	0	0	0	0
ASV_1894	Bacteria	Actinobacteriota	MB-A2-108	unclassified_MB-A2-108	unclassified_MB-A2-108	unclassified_MB-A2-108	unclassified_MB-A2-108	0	0	0	0	0	0	0	0	0	0	0	0	0	0	0	0	0	0	0	0	0	0	0	0	0	127
ASV_1895	Bacteria	Proteobacteria	Gammaproteobacteria	Xanthomonadales	Rhodanobacteraceae	Pseudofulvimonas	unclassified_Pseudofulvimonas	44	27	0	0	0	0	7	0	0	0	0	0	0	48	0	0	0	0	0	0	0	0	0	0	0	0
ASV_1896	Bacteria	Bacteroidota	Bacteroidia	Cytophagales	unclassified_Cytophagales	unclassified_Cytophagales	unclassified_Cytophagales	34	9	0	0	0	3	25	26	0	0	0	0	0	0	13	12	0	0	4	0	0	0	0	0	0	0
ASV_1897	Bacteria	Proteobacteria	Alphaproteobacteria	Caulobacterales	Caulobacteraceae	Caulobacter	unclassified_Caulobacter	27	10	17	9	27	0	0	0	13	0	0	11	0	0	0	0	12	0	0	0	0	0	0	0	0	0
ASV_1898	Bacteria	Acidobacteriota	Blastocatellia	Pyrinomonadales	Pyrinomonadaceae	RB41	unclassified_RB41	0	0	0	0	0	0	0	44	0	0	0	0	0	0	82	0	0	0	0	0	0	0	0	0	0	0
ASV_1899	Bacteria	Verrucomicrobiota	Verrucomicrobiae	Chthoniobacterales	Terrimicrobiaceae	Terrimicrobium	unclassified_Terrimicrobium	0	0	0	0	0	0	0	0	126	0	0	0	0	0	0	0	0	0	0	0	0	0	0	0	0	0
ASV_1900	Bacteria	Verrucomicrobiota	Chlamydiae	Chlamydiales	Parachlamydiaceae	Neochlamydia	unclassified_Neochlamydia	0	0	0	0	0	0	0	0	0	0	0	0	102	24	0	0	0	0	0	0	0	0	0	0	0	0
ASV_1901	Bacteria	Bdellovibrionota	Oligoflexia	0319-6G20	unclassified_0319-6G20	unclassified_0319-6G20	unclassified_0319-6G20	21	0	0	0	0	0	0	0	0	0	104	0	0	0	0	0	0	0	0	0	0	0	0	0	0	0
ASV_1902	Bacteria	Planctomycetota	Phycisphaerae	Tepidisphaerales	WD2101 soil group	unclassified_WD2101 soil group	unclassified_WD2101 soil group	0	0	0	0	0	0	0	10	0	0	0	0	0	0	0	102	0	0	0	0	0	13	0	0	0	0
ASV_1903	Bacteria	Proteobacteria	unclassified_Proteobacteria	unclassified_Proteobacteria	unclassified_Proteobacteria	unclassified_Proteobacteria	unclassified_Proteobacteria	0	0	0	0	0	0	0	0	99	15	0	11	0	0	0	0	0	0	0	0	0	0	0	0	0	0
ASV_1904	Bacteria	Actinobacteriota	Acidimicrobiia	IMCC26256	unclassified_IMCC26256	unclassified_IMCC26256	unclassified_IMCC26256	0	0	0	0	0	0	0	0	0	0	0	16	65	23	21	0	0	0	0	0	0	0	0	0	0	0
ASV_1905	Bacteria	Proteobacteria	Gammaproteobacteria	Nitrosococcales	Nitrosococcaceae	wb1-P19	unclassified_wb1-P19	0	0	0	0	0	0	0	0	0	0	0	0	0	0	125	0	0	0	0	0	0	0	0	0	0	0
ASV_1906	Bacteria	Actinobacteriota	MB-A2-108	unclassified_MB-A2-108	unclassified_MB-A2-108	unclassified_MB-A2-108	unclassified_MB-A2-108	0	0	0	0	0	0	0	0	0	0	0	0	0	0	0	0	0	0	19	0	106	0	0	0	0	0
ASV_1907	Bacteria	Proteobacteria	Alphaproteobacteria	Rhizobiales	Beijerinckiaceae	Methylobacterium-Methylorubrum	brachiatum	11	23	0	90	0	0	0	0	0	0	0	0	0	0	0	0	0	0	0	0	0	0	0	0	0	0
ASV_1908	Bacteria	Verrucomicrobiota	Verrucomicrobiae	Verrucomicrobiales	Verrucomicrobiaceae	unclassified_Verrucomicrobiaceae	unclassified_Verrucomicrobiaceae	5	87	0	32	0	0	0	0	0	0	0	0	0	0	0	0	0	0	0	0	0	0	0	0	0	0
ASV_1909	Bacteria	Bacteroidota	Bacteroidia	Chitinophagales	Chitinophagaceae	Segetibacter	unclassified_Segetibacter	0	0	0	75	0	0	0	0	0	0	0	0	0	0	0	49	0	0	0	0	0	0	0	0	0	0
ASV_1910	Bacteria	Actinobacteriota	Acidimicrobiia	Microtrichales	Iamiaceae	Iamia	unclassified_Iamia	0	0	0	0	0	0	0	0	0	0	0	0	0	0	0	0	0	0	31	38	36	0	0	19	0	0
ASV_1911	Bacteria	Proteobacteria	Alphaproteobacteria	Rhodobacterales	Rhodobacteraceae	unclassified_Rhodobacteraceae	unclassified_Rhodobacteraceae	0	0	0	0	0	0	0	0	0	0	0	0	0	0	0	0	0	0	16	0	0	9	0	99	0	0
ASV_1912	Bacteria	Chloroflexi	Chloroflexia	Thermomicrobiales	JG30-KF-CM45	unclassified_JG30-KF-CM45	unclassified_JG30-KF-CM45	7	4	0	0	0	0	0	0	35	6	0	8	24	0	0	0	32	0	0	0	0	0	0	0	0	7
ASV_1913	Bacteria	Bdellovibrionota	Oligoflexia	0319-6G20	unclassified_0319-6G20	unclassified_0319-6G20	unclassified_0319-6G20	0	88	0	0	0	0	0	0	0	0	0	0	0	0	13	22	0	0	0	0	0	0	0	0	0	0
ASV_1914	Bacteria	Proteobacteria	Alphaproteobacteria	Caulobacterales	Caulobacteraceae	unclassified_Caulobacteraceae	unclassified_Caulobacteraceae	0	12	16	15	41	0	0	0	0	0	0	0	17	0	0	0	22	0	0	0	0	0	0	0	0	0
ASV_1915	Bacteria	Actinobacteriota	Thermoleophilia	Solirubrobacterales	Solirubrobacteraceae	Solirubrobacter	unclassified_Solirubrobacter	0	0	35	0	0	70	0	0	0	0	0	0	0	0	0	0	0	18	0	0	0	0	0	0	0	0
ASV_1916	Bacteria	Myxococcota	Polyangia	unclassified_Polyangia	unclassified_Polyangia	unclassified_Polyangia	unclassified_Polyangia	0	0	0	19	0	0	0	0	32	12	0	37	12	0	0	0	11	0	0	0	0	0	0	0	0	0
ASV_1917	Bacteria	Bacteroidota	Bacteroidia	Sphingobacteriales	FFCH9454	unclassified_FFCH9454	unclassified_FFCH9454	0	0	0	4	49	0	0	0	0	0	0	0	6	0	15	0	36	0	0	0	0	13	0	0	0	0
ASV_1918	Bacteria	Planctomycetota	Planctomycetes	Pirellulales	Pirellulaceae	Pirellula	unclassified_Pirellula	0	0	0	0	0	0	0	0	0	0	0	47	14	62	0	0	0	0	0	0	0	0	0	0	0	0
ASV_1919	Bacteria	Planctomycetota	Planctomycetes	Gemmatales	Gemmataceae	unclassified_Gemmataceae	unclassified_Gemmataceae	0	0	0	0	0	0	0	0	0	0	0	0	11	0	0	0	0	0	0	0	0	0	0	0	0	112
ASV_1920	Bacteria	Bacteroidota	Bacteroidia	Flavobacteriales	Flavobacteriaceae	Flavobacterium	unclassified_Flavobacterium	0	0	0	0	0	0	0	0	0	0	0	0	0	0	0	0	0	74	15	34	0	0	0	0	0	0
ASV_1921	Bacteria	Proteobacteria	Alphaproteobacteria	Rhodobacterales	Rhodobacteraceae	Amaricoccus	unclassified_Amaricoccus	0	0	0	0	0	0	0	0	0	0	0	0	0	0	0	0	0	0	75	0	0	48	0	0	0	0
ASV_1922	Bacteria	Planctomycetota	Planctomycetes	Isosphaerales	Isosphaeraceae	unclassified_Isosphaeraceae	unclassified_Isosphaeraceae	0	0	0	0	0	0	0	0	0	0	0	0	0	0	0	0	0	0	0	47	0	0	29	47	0	0
ASV_1923	Bacteria	Bdellovibrionota	Bdellovibrionia	Bdellovibrionales	Bdellovibrionaceae	OM27 clade	unclassified_OM27 clade	0	0	0	0	0	0	0	0	0	0	0	0	0	0	0	0	0	0	0	0	123	0	0	0	0	0
ASV_1924	Bacteria	Acidobacteriota	Vicinamibacteria	Vicinamibacterales	unclassified_Vicinamibacterales	unclassified_Vicinamibacterales	unclassified_Vicinamibacterales	0	0	0	0	0	0	0	0	0	0	0	0	0	0	0	0	0	0	0	0	0	46	0	0	24	53
ASV_1925	Bacteria	Patescibacteria	Parcubacteria	unclassified_Parcubacteria	unclassified_Parcubacteria	unclassified_Parcubacteria	unclassified_Parcubacteria	0	30	0	18	0	0	0	0	0	0	0	9	0	0	0	0	65	0	0	0	0	0	0	0	0	0
ASV_1926	Bacteria	Abditibacteriota	Abditibacteria	Abditibacteriales	Abditibacteriaceae	Abditibacterium	unclassified_Abditibacterium	0	13	0	0	0	0	0	0	10	0	47	12	24	0	0	16	0	0	0	0	0	0	0	0	0	0
ASV_1927	Bacteria	Bacteroidota	Bacteroidia	Cytophagales	Spirosomaceae	Spirosoma	unclassified_Spirosoma	0	8	0	0	0	0	0	0	54	0	11	17	32	0	0	0	0	0	0	0	0	0	0	0	0	0
ASV_1928	Bacteria	Chloroflexi	Anaerolineae	Caldilineales	Caldilineaceae	unclassified_Caldilineaceae	unclassified_Caldilineaceae	0	4	8	0	0	0	13	5	0	0	0	0	0	0	17	0	0	4	54	0	0	17	0	0	0	0
ASV_1929	Bacteria	Bacteroidota	Bacteroidia	Cytophagales	Hymenobacteraceae	Hymenobacter	unclassified_Hymenobacter	0	0	0	106	0	0	0	0	0	0	0	0	16	0	0	0	0	0	0	0	0	0	0	0	0	0
ASV_1930	Bacteria	Verrucomicrobiota	Verrucomicrobiae	Chthoniobacterales	Chthoniobacteraceae	unclassified_Chthoniobacteraceae	unclassified_Chthoniobacteraceae	0	0	0	0	0	0	13	0	0	0	0	0	0	0	95	0	0	0	0	0	0	0	0	0	0	14
ASV_1931	Bacteria	Chloroflexi	KD4-96	unclassified_KD4-96	unclassified_KD4-96	unclassified_KD4-96	unclassified_KD4-96	0	0	0	0	0	0	0	17	0	0	0	0	42	8	19	0	36	0	0	0	0	0	0	0	0	0
ASV_1933	Bacteria	Actinobacteriota	Actinobacteria	Propionibacteriales	Nocardioidaceae	Marmoricola	unclassified_Marmoricola	0	0	0	0	0	0	0	0	0	0	0	0	0	56	28	0	0	0	38	0	0	0	0	0	0	0
ASV_1934	Bacteria	Actinobacteriota	Actinobacteria	Propionibacteriales	Nocardioidaceae	Nocardioides	unclassified_Nocardioides	0	0	0	0	0	0	0	0	0	0	0	0	0	0	0	122	0	0	0	0	0	0	0	0	0	0
ASV_1935	Bacteria	Chloroflexi	Ktedonobacteria	C0119	unclassified_C0119	unclassified_C0119	unclassified_C0119	0	0	0	0	0	0	0	0	0	0	0	0	0	0	0	122	0	0	0	0	0	0	0	0	0	0
ASV_1936	Bacteria	Proteobacteria	Alphaproteobacteria	Rhizobiales	C2U	unclassified_C2U	unclassified_C2U	0	0	0	0	0	0	0	0	0	0	0	0	0	0	0	0	0	0	0	6	79	0	16	21	0	0
ASV_1937	Bacteria	Bacteroidota	Bacteroidia	Flavobacteriales	Flavobacteriaceae	Planktosalinus	unclassified_Planktosalinus	0	0	0	0	0	0	0	0	0	0	0	0	0	0	0	0	0	0	0	0	122	0	0	0	0	0
ASV_1938	Bacteria	Planctomycetota	vadinHA49	unclassified_vadinHA49	unclassified_vadinHA49	unclassified_vadinHA49	unclassified_vadinHA49	31	0	0	0	0	0	0	0	0	0	0	22	29	0	0	10	0	0	29	0	0	0	0	0	0	0
ASV_1939	Bacteria	Proteobacteria	Alphaproteobacteria	Acetobacterales	Acetobacteraceae	Rhodovastum	unclassified_Rhodovastum	22	34	0	9	0	0	0	0	0	0	0	0	0	0	0	0	56	0	0	0	0	0	0	0	0	0
ASV_1940	Bacteria	Bdellovibrionota	Bdellovibrionia	Bdellovibrionales	Bdellovibrionaceae	Bdellovibrio	unclassified_Bdellovibrio	18	15	6	13	52	5	0	0	0	0	0	0	0	0	0	0	12	0	0	0	0	0	0	0	0	0
ASV_1941	Bacteria	Proteobacteria	Alphaproteobacteria	Rhodobacterales	Rhodobacteraceae	Amaricoccus	unclassified_Amaricoccus	6	0	49	13	0	0	0	0	0	0	0	13	0	0	0	0	0	0	40	0	0	0	0	0	0	0
ASV_1942	Bacteria	Actinobacteriota	Actinobacteria	Frankiales	Nakamurellaceae	Nakamurella	unclassified_Nakamurella	0	79	0	26	0	0	0	0	7	0	0	9	0	0	0	0	0	0	0	0	0	0	0	0	0	0
ASV_1943	Bacteria	Bacteroidota	Bacteroidia	Cytophagales	Hymenobacteraceae	Adhaeribacter	unclassified_Adhaeribacter	0	0	0	34	34	4	49	0	0	0	0	0	0	0	0	0	0	0	0	0	0	0	0	0	0	0
ASV_1944	Bacteria	Gemmatimonadota	Gemmatimonadetes	Gemmatimonadales	Gemmatimonadaceae	Gemmatimonas	unclassified_Gemmatimonas	0	0	0	14	0	0	0	0	0	0	0	0	0	0	0	107	0	0	0	0	0	0	0	0	0	0
ASV_1945	Bacteria	Actinobacteriota	Thermoleophilia	Gaiellales	Gaiellaceae	Gaiella	unclassified_Gaiella	0	0	0	0	0	32	0	0	0	0	0	0	0	0	0	52	0	37	0	0	0	0	0	0	0	0
ASV_1946	Bacteria	Cyanobacteria	Cyanobacteriia	Cyanobacteriales	unclassified_Cyanobacteriales	unclassified_Cyanobacteriales	unclassified_Cyanobacteriales	0	0	0	0	0	0	11	0	0	0	0	0	0	0	0	0	0	0	24	0	74	7	5	0	0	0
ASV_1947	Bacteria	Acidobacteriota	Acidobacteriae	Bryobacterales	Bryobacteraceae	Bryobacter	unclassified_Bryobacter	0	0	0	0	0	0	0	0	0	0	0	51	25	45	0	0	0	0	0	0	0	0	0	0	0	0
ASV_1948	Bacteria	Bacteroidota	Bacteroidia	Flavobacteriales	Flavobacteriaceae	Flavobacterium	crassostreae	0	0	0	0	0	0	0	0	0	0	0	0	12	33	76	0	0	0	0	0	0	0	0	0	0	0
ASV_1949	Bacteria	Chloroflexi	Chloroflexia	Thermomicrobiales	JG30-KF-CM45	unclassified_JG30-KF-CM45	unclassified_JG30-KF-CM45	0	0	0	0	0	0	0	0	0	0	0	0	0	0	0	89	0	18	0	0	0	14	0	0	0	0
ASV_1950	Bacteria	Gemmatimonadota	Gemmatimonadetes	Gemmatimonadales	Gemmatimonadaceae	unclassified_Gemmatimonadaceae	unclassified_Gemmatimonadaceae	0	0	0	0	0	0	0	0	0	0	0	0	0	0	0	0	0	0	121	0	0	0	0	0	0	0
ASV_1951	Bacteria	Proteobacteria	Alphaproteobacteria	Sphingomonadales	Sphingomonadaceae	Qipengyuania	unclassified_Qipengyuania	0	0	0	0	0	0	0	0	0	0	0	0	0	0	0	0	0	0	22	65	34	0	0	0	0	0
ASV_1952	Bacteria	Bacteroidota	Bacteroidia	Sphingobacteriales	S15-21	unclassified_S15-21	unclassified_S15-21	0	0	0	0	0	0	0	0	0	0	0	0	0	0	0	0	0	0	17	0	104	0	0	0	0	0
ASV_1953	Bacteria	Bacteroidota	Bacteroidia	Sphingobacteriales	LiUU-11-161	unclassified_LiUU-11-161	unclassified_LiUU-11-161	0	0	0	0	0	0	0	0	0	0	0	0	0	0	0	0	0	0	0	0	30	0	91	0	0	0
ASV_1954	Bacteria	Acidobacteriota	Vicinamibacteria	Vicinamibacterales	Vicinamibacteraceae	unclassified_Vicinamibacteraceae	unclassified_Vicinamibacteraceae	0	0	0	0	0	0	0	0	0	0	0	0	0	0	0	0	0	0	0	0	0	0	0	0	26	95
ASV_1955	Bacteria	Myxococcota	Polyangia	mle1-27	unclassified_mle1-27	unclassified_mle1-27	unclassified_mle1-27	30	79	0	0	11	0	0	0	0	0	0	0	0	0	0	0	0	0	0	0	0	0	0	0	0	0
ASV_1956	Bacteria	Cyanobacteria	Sericytochromatia	unclassified_Sericytochromatia	unclassified_Sericytochromatia	unclassified_Sericytochromatia	unclassified_Sericytochromatia	18	0	28	0	0	0	17	12	0	0	0	0	0	0	16	19	0	0	10	0	0	0	0	0	0	0
ASV_1957	Bacteria	Chloroflexi	Chloroflexia	Thermomicrobiales	JG30-KF-CM45	unclassified_JG30-KF-CM45	unclassified_JG30-KF-CM45	16	18	21	16	0	0	7	0	0	0	0	0	0	0	0	0	42	0	0	0	0	0	0	0	0	0
ASV_1958	Bacteria	Actinobacteriota	Actinobacteria	Propionibacteriales	Nocardioidaceae	Nocardioides	unclassified_Nocardioides	0	34	0	67	0	0	0	0	0	0	0	0	19	0	0	0	0	0	0	0	0	0	0	0	0	0
ASV_1959	Bacteria	Proteobacteria	Alphaproteobacteria	Rhizobiales	Rhizobiaceae	Mesorhizobium	unclassified_Mesorhizobium	0	12	0	108	0	0	0	0	0	0	0	0	0	0	0	0	0	0	0	0	0	0	0	0	0	0
ASV_1960	Bacteria	Verrucomicrobiota	Chlamydiae	Chlamydiales	Parachlamydiaceae	unclassified_Parachlamydiaceae	unclassified_Parachlamydiaceae	0	0	9	0	0	0	0	7	0	0	0	0	57	19	18	0	0	0	10	0	0	0	0	0	0	0
ASV_1961	Bacteria	Cyanobacteria	Cyanobacteriia	Cyanobacteriales	Xenococcaceae	Pleurocapsa PCC-7319	unclassified_Pleurocapsa PCC-7319	0	0	5	0	0	0	0	6	0	0	0	0	0	0	0	0	0	0	0	0	0	106	0	0	0	3
ASV_1962	Bacteria	Actinobacteriota	Acidimicrobiia	Microtrichales	Iamiaceae	Iamia	unclassified_Iamia	0	0	0	27	0	0	0	0	0	11	0	0	0	0	0	0	61	0	0	0	0	0	0	21	0	0
ASV_1963	Bacteria	Nitrospirota	Nitrospiria	Nitrospirales	Nitrospiraceae	Nitrospira	bacterium	0	0	0	0	0	9	0	0	0	0	0	0	0	0	0	0	0	0	0	22	76	0	13	0	0	0
ASV_1964	Bacteria	Proteobacteria	Alphaproteobacteria	Rhizobiales	Amb-16S-1323	unclassified_Amb-16S-1323	unclassified_Amb-16S-1323	0	0	0	0	0	0	0	12	0	0	0	0	0	0	0	0	0	0	42	66	0	0	0	0	0	0
ASV_1965	Bacteria	unclassified_Bacteria	unclassified_Bacteria	unclassified_Bacteria	unclassified_Bacteria	unclassified_Bacteria	unclassified_Bacteria	0	0	0	0	0	0	0	0	0	0	0	0	3	0	115	2	0	0	0	0	0	0	0	0	0	0
ASV_1966	Bacteria	Planctomycetota	Phycisphaerae	Phycisphaerales	Phycisphaeraceae	unclassified_Phycisphaeraceae	unclassified_Phycisphaeraceae	0	0	0	0	0	0	0	0	0	0	0	0	0	0	44	0	0	0	25	29	0	22	0	0	0	0
ASV_1967	Archaea	Crenarchaeota	Nitrososphaeria	Nitrososphaerales	Nitrososphaeraceae	unclassified_Nitrososphaeraceae	unclassified_Nitrososphaeraceae	0	0	0	0	0	0	0	0	0	0	0	0	0	0	0	0	0	120	0	0	0	0	0	0	0	0
ASV_1968	Bacteria	Cyanobacteria	Cyanobacteriia	Phormidesmiales	Nodosilineaceae	Nodosilinea PCC-7104	unclassified_Nodosilinea PCC-7104	0	0	0	0	0	0	0	0	0	0	0	0	0	0	0	0	0	0	120	0	0	0	0	0	0	0
ASV_1970	Bacteria	Bacteroidota	Bacteroidia	Chitinophagales	Chitinophagaceae	Edaphobaculum	unclassified_Edaphobaculum	0	0	95	0	0	0	12	0	0	0	0	0	0	0	0	0	0	12	0	0	0	0	0	0	0	0
ASV_1971	Bacteria	Actinobacteriota	Actinobacteria	Frankiales	Frankiaceae	Jatrophihabitans	unclassified_Jatrophihabitans	0	0	0	33	50	36	0	0	0	0	0	0	0	0	0	0	0	0	0	0	0	0	0	0	0	0
ASV_1972	Bacteria	Planctomycetota	Phycisphaerae	Tepidisphaerales	WD2101 soil group	unclassified_WD2101 soil group	unclassified_WD2101 soil group	0	0	0	6	0	0	0	0	0	0	0	0	0	0	19	7	46	0	7	0	0	26	0	0	0	8
ASV_1973	Archaea	Crenarchaeota	Nitrososphaeria	Nitrososphaerales	Nitrososphaeraceae	Candidatus Nitrocosmicus	unclassified_Candidatus Nitrocosmicus	0	0	0	0	0	0	38	81	0	0	0	0	0	0	0	0	0	0	0	0	0	0	0	0	0	0
ASV_1974	Bacteria	Chloroflexi	TK10	unclassified_TK10	unclassified_TK10	unclassified_TK10	unclassified_TK10	0	0	0	0	0	0	0	8	0	0	0	0	0	0	6	0	0	18	10	0	0	77	0	0	0	0
ASV_1975	Bacteria	Acidobacteriota	Blastocatellia	Blastocatellales	Blastocatellaceae	JGI 0001001-H03	unclassified_JGI 0001001-H03	0	0	0	0	0	0	0	0	0	0	0	0	119	0	0	0	0	0	0	0	0	0	0	0	0	0
ASV_1976	Bacteria	Sumerlaeota	Sumerlaeia	Sumerlaeales	Sumerlaeaceae	Sumerlaea	unclassified_Sumerlaea	0	0	0	0	0	0	0	0	0	0	0	0	0	0	0	0	0	0	0	62	21	0	11	25	0	0
ASV_1977	Bacteria	Proteobacteria	Alphaproteobacteria	Sphingomonadales	Sphingomonadaceae	Sphingomonas	soli	69	0	0	20	29	0	0	0	0	0	0	0	0	0	0	0	0	0	0	0	0	0	0	0	0	0
ASV_1978	Bacteria	Bdellovibrionota	Oligoflexia	0319-6G20	unclassified_0319-6G20	unclassified_0319-6G20	unclassified_0319-6G20	23	0	14	50	21	0	0	0	0	0	0	0	0	0	0	0	0	0	0	0	10	0	0	0	0	0
ASV_1979	Bacteria	Actinobacteriota	Acidimicrobiia	unclassified_Acidimicrobiia	unclassified_Acidimicrobiia	unclassified_Acidimicrobiia	unclassified_Acidimicrobiia	22	0	0	0	0	0	24	45	0	0	0	0	0	0	0	0	0	0	0	0	0	0	0	0	0	27
ASV_1980	Bacteria	Sumerlaeota	Sumerlaeia	Sumerlaeales	Sumerlaeaceae	Sumerlaea	unclassified_Sumerlaea	9	19	0	4	0	0	0	0	0	0	0	0	0	0	33	0	53	0	0	0	0	0	0	0	0	0
ASV_1981	Bacteria	Verrucomicrobiota	Chlamydiae	Chlamydiales	Parachlamydiaceae	unclassified_Parachlamydiaceae	unclassified_Parachlamydiaceae	0	0	0	0	0	0	0	0	0	0	9	83	26	0	0	0	0	0	0	0	0	0	0	0	0	0
ASV_1982	Bacteria	Gemmatimonadota	S0134 terrestrial group	unclassified_S0134 terrestrial group	unclassified_S0134 terrestrial group	unclassified_S0134 terrestrial group	unclassified_S0134 terrestrial group	0	0	0	0	0	0	0	0	0	0	0	0	118	0	0	0	0	0	0	0	0	0	0	0	0	0
ASV_1983	Bacteria	Proteobacteria	Alphaproteobacteria	Rhizobiales	Xanthobacteraceae	unclassified_Xanthobacteraceae	unclassified_Xanthobacteraceae	0	0	0	0	0	0	0	0	0	0	0	0	62	56	0	0	0	0	0	0	0	0	0	0	0	0
ASV_1984	Bacteria	Armatimonadota	Armatimonadia	Armatimonadales	unclassified_Armatimonadales	unclassified_Armatimonadales	unclassified_Armatimonadales	0	0	0	0	0	0	0	0	0	0	0	0	0	0	18	71	0	0	0	0	0	29	0	0	0	0
ASV_1985	Bacteria	Bacteroidota	Bacteroidia	Chitinophagales	unclassified_Chitinophagales	unclassified_Chitinophagales	unclassified_Chitinophagales	0	0	0	0	0	0	0	0	0	0	0	0	0	0	0	118	0	0	0	0	0	0	0	0	0	0
ASV_1986	Bacteria	Actinobacteriota	Thermoleophilia	Solirubrobacterales	Solirubrobacteraceae	Solirubrobacter	unclassified_Solirubrobacter	0	0	0	0	0	0	0	0	0	0	0	0	0	0	0	118	0	0	0	0	0	0	0	0	0	0
ASV_1987	Bacteria	Acidobacteriota	Blastocatellia	Blastocatellales	Blastocatellaceae	Blastocatella	unclassified_Blastocatella	0	0	0	0	0	0	0	0	0	0	0	0	0	0	0	0	0	118	0	0	0	0	0	0	0	0
ASV_1988	Bacteria	Gemmatimonadota	Gemmatimonadetes	Gemmatimonadales	Gemmatimonadaceae	unclassified_Gemmatimonadaceae	unclassified_Gemmatimonadaceae	0	0	0	0	0	0	0	0	0	0	0	0	0	0	0	0	0	0	0	118	0	0	0	0	0	0
ASV_1989	Bacteria	Planctomycetota	Planctomycetes	Isosphaerales	Isosphaeraceae	unclassified_Isosphaeraceae	unclassified_Isosphaeraceae	0	0	0	0	0	0	0	0	0	0	0	0	0	0	0	0	0	0	0	0	70	0	48	0	0	0
ASV_1990	Bacteria	Acidobacteriota	Blastocatellia	Blastocatellales	Blastocatellaceae	unclassified_Blastocatellaceae	unclassified_Blastocatellaceae	0	0	0	0	0	0	0	0	0	0	0	0	0	0	0	0	0	0	0	0	0	118	0	0	0	0
ASV_1991	Archaea	Crenarchaeota	Nitrososphaeria	Nitrososphaerales	Nitrososphaeraceae	unclassified_Nitrososphaeraceae	unclassified_Nitrososphaeraceae	0	0	0	0	0	0	0	0	0	0	0	0	0	0	0	0	0	0	0	0	0	0	0	0	0	118
ASV_1992	Bacteria	Actinobacteriota	Acidimicrobiia	unclassified_Acidimicrobiia	unclassified_Acidimicrobiia	unclassified_Acidimicrobiia	unclassified_Acidimicrobiia	0	0	0	0	21	0	0	0	0	0	0	0	0	0	0	0	0	0	79	17	0	0	0	0	0	0
ASV_1993	Bacteria	Cyanobacteria	Cyanobacteriia	Phormidesmiales	Phormidesmiaceae	Phormidesmis ANT.LACV5.1	unclassified_Phormidesmis ANT.LACV5.1	0	0	0	0	0	0	36	0	0	0	0	0	0	0	0	0	0	0	81	0	0	0	0	0	0	0
ASV_1994	Bacteria	Acidobacteriota	Blastocatellia	2024-11-01	unclassified_11-24	unclassified_11-24	unclassified_11-24	0	0	0	0	0	0	2	0	0	0	0	0	0	0	0	0	0	28	0	0	0	0	0	0	0	87
ASV_1995	Bacteria	Proteobacteria	Alphaproteobacteria	Sphingomonadales	Sphingomonadaceae	Sphingomonas	unclassified_Sphingomonas	0	0	0	0	0	0	0	0	117	0	0	0	0	0	0	0	0	0	0	0	0	0	0	0	0	0
ASV_1996	Bacteria	Myxococcota	Polyangia	mle1-27	unclassified_mle1-27	unclassified_mle1-27	unclassified_mle1-27	0	0	0	0	0	0	0	0	0	0	0	0	0	0	54	63	0	0	0	0	0	0	0	0	0	0
ASV_1997	Bacteria	Verrucomicrobiota	Verrucomicrobiae	Chthoniobacterales	Chthoniobacteraceae	Chthoniobacter	unclassified_Chthoniobacter	0	0	0	0	0	0	0	0	0	0	0	0	0	0	0	0	0	0	0	59	0	0	0	58	0	0
ASV_1998	Bacteria	Gemmatimonadota	Gemmatimonadetes	Gemmatimonadales	Gemmatimonadaceae	unclassified_Gemmatimonadaceae	unclassified_Gemmatimonadaceae	0	0	0	0	0	0	0	0	0	0	0	0	0	0	0	0	0	0	0	0	117	0	0	0	0	0
ASV_1999	Bacteria	Proteobacteria	Gammaproteobacteria	Pseudomonadales	Pseudohongiellaceae	BIyi10	unclassified_BIyi10	39	12	29	12	0	0	0	0	0	0	0	2	0	0	0	0	6	0	0	0	0	0	0	0	0	16
ASV_2000	Bacteria	Proteobacteria	Alphaproteobacteria	Paracaedibacterales	Paracaedibacteraceae	Candidatus Paracaedibacter	unclassified_Candidatus Paracaedibacter	0	0	37	0	50	0	0	0	0	0	0	0	0	0	0	29	0	0	0	0	0	0	0	0	0	0
ASV_2001	Bacteria	Bacteroidota	Bacteroidia	Cytophagales	Microscillaceae	unclassified_Microscillaceae	unclassified_Microscillaceae	0	0	0	0	0	0	0	0	116	0	0	0	0	0	0	0	0	0	0	0	0	0	0	0	0	0
ASV_2002	Bacteria	Verrucomicrobiota	Chlamydiae	Chlamydiales	Parachlamydiaceae	unclassified_Parachlamydiaceae	unclassified_Parachlamydiaceae	0	0	0	0	0	0	0	0	14	8	10	84	0	0	0	0	0	0	0	0	0	0	0	0	0	0
ASV_2003	Bacteria	Chloroflexi	Anaerolineae	Anaerolineales	Anaerolineaceae	unclassified_Anaerolineaceae	unclassified_Anaerolineaceae	0	0	0	0	0	0	0	0	6	0	0	6	76	20	0	8	0	0	0	0	0	0	0	0	0	0
ASV_2004	Bacteria	Proteobacteria	Alphaproteobacteria	Rhizobiales	A0839	unclassified_A0839	unclassified_A0839	0	0	0	0	0	0	0	0	4	0	0	26	61	25	0	0	0	0	0	0	0	0	0	0	0	0
ASV_2005	Bacteria	Bacteroidota	Bacteroidia	Cytophagales	Spirosomaceae	Dyadobacter	unclassified_Dyadobacter	0	0	0	0	0	0	0	0	0	0	116	0	0	0	0	0	0	0	0	0	0	0	0	0	0	0
ASV_2006	Bacteria	Proteobacteria	Gammaproteobacteria	Burkholderiales	Nitrosomonadaceae	Ellin6067	unclassified_Ellin6067	0	0	0	0	0	0	0	0	0	0	0	0	116	0	0	0	0	0	0	0	0	0	0	0	0	0
ASV_2007	Bacteria	Bacteroidota	Bacteroidia	Chitinophagales	Chitinophagaceae	Flaviaesturariibacter	unclassified_Flaviaesturariibacter	0	0	0	0	0	0	0	0	0	0	0	0	0	0	116	0	0	0	0	0	0	0	0	0	0	0
ASV_2008	Bacteria	Proteobacteria	Gammaproteobacteria	Burkholderiales	unclassified_Burkholderiales	unclassified_Burkholderiales	unclassified_Burkholderiales	0	0	0	0	0	0	0	0	0	0	0	0	0	0	0	0	0	0	22	31	63	0	0	0	0	0
ASV_2009	Bacteria	Planctomycetota	Phycisphaerae	Tepidisphaerales	WD2101 soil group	unclassified_WD2101 soil group	unclassified_WD2101 soil group	0	0	0	0	0	0	0	0	0	0	0	0	0	0	0	0	0	0	0	25	21	0	0	70	0	0
ASV_2010	Bacteria	Proteobacteria	Gammaproteobacteria	Pseudomonadales	Pseudohongiellaceae	Pseudohongiella	acticola	0	0	0	0	0	0	0	0	0	0	0	0	0	0	0	0	0	0	0	0	27	0	89	0	0	0
ASV_2011	Bacteria	Proteobacteria	Gammaproteobacteria	Diplorickettsiales	Diplorickettsiaceae	unclassified_Diplorickettsiaceae	unclassified_Diplorickettsiaceae	0	13	0	0	0	0	0	0	0	0	0	8	0	0	0	0	94	0	0	0	0	0	0	0	0	0
ASV_2012	Bacteria	Bacteroidota	Bacteroidia	Chitinophagales	Chitinophagaceae	Segetibacter	unclassified_Segetibacter	0	0	0	61	41	0	0	0	0	0	0	0	0	0	0	13	0	0	0	0	0	0	0	0	0	0
ASV_2013	Bacteria	Bacteroidota	Bacteroidia	Cytophagales	Hymenobacteraceae	unclassified_Hymenobacteraceae	unclassified_Hymenobacteraceae	0	0	0	7	0	0	16	0	0	0	0	0	0	0	4	0	0	0	0	88	0	0	0	0	0	0
ASV_2014	Bacteria	Chloroflexi	Chloroflexia	Thermomicrobiales	JG30-KF-CM45	unclassified_JG30-KF-CM45	unclassified_JG30-KF-CM45	0	0	0	0	0	20	0	0	0	0	0	0	0	0	95	0	0	0	0	0	0	0	0	0	0	0
ASV_2015	Bacteria	Cyanobacteria	Cyanobacteriia	Cyanobacteriales	Chroococcidiopsaceae	Chlorogloea SAG 10.99	unclassified_Chlorogloea SAG 10.99	0	0	0	0	0	0	54	0	0	0	0	0	0	0	0	0	0	0	61	0	0	0	0	0	0	0
ASV_2016	Bacteria	Planctomycetota	Phycisphaerae	Tepidisphaerales	WD2101 soil group	unclassified_WD2101 soil group	unclassified_WD2101 soil group	0	0	0	0	0	0	45	11	0	0	0	0	0	0	0	0	0	0	28	0	0	0	0	31	0	0
[truncated: 8,183 more rows]

## Sheet: S7
Table S7. 18S ASVs abundance and taxonomy
ID	Domain	Kingdom	Supergroup	Division	Class	Order	Family	Genus	Species	BH-01	BH-02	BH-03	BH-04	BH-05	BH-06	BH-07	BH-08	BH-09	BH-10	BH-11	BH-12	BH-13	BH-14	BH-15	BH-16	BH-17	BH-18	BH-19	BH-20	BH-21	BH-22	BH-23	BH-24	BH-25	BH-26
ASV_1	Eukaryota	Obazoa	Opisthokonta	Fungi	Ascomycota	Pezizomycotina	Eurotiomycetes	Phialophora	Phialophora_sp.	10569	23946	17	7457	44	69	0	0	61986	45560	2970	48407	19511	38963	2	0	35223	86	0	34	14	30	2	0	97	35941
ASV_2	Eukaryota	Obazoa	Opisthokonta	Fungi	Ascomycota	Pezizomycotina	Dothideomycetes	Davidiella	Davidiella_tassiana	9370	8865	16063	44938	33082	24562	114	26	70	1121	9	3653	1428	72	0	0	2798	7	0	25	11	8	0	0	2860	342
ASV_3	Eukaryota	TSAR	Rhizaria	Cercozoa	Filosa-Thecofilosea	Cryomonadida	Rhogostoma-lineage	Rhogostoma	Rhogostoma_minus	257	18723	9	5025	46456	13947	10	0	0	14	0	0	0	9	0	0	13	19	0	6	36	0	0	0	470	0
ASV_4	Eukaryota	TSAR	Stramenopiles	Gyrista	Chrysophyceae	Ochromonadales	Ochromonadaceae	Spumella	Spumella_similis	985	1469	1030	4567	1490	3766	4200	1192	15467	10451	16180	5201	630	449	549	0	3120	197	296	16	0	0	0	0	1981	122
ASV_5	Eukaryota	Archaeplastida	Chlorophyta	Chlorophyta_X	Chlorophyta_XX	Chlorophyta_XXX	Chlorophyta_XXXX	Scotinosphaera	unclassified_Scotinosphaera	610	192	3460	276	150	278	2286	406	23	52	0	44	0	0	685	77	62	47601	5714	15	25	5249	0	0	407	0
ASV_6	Eukaryota	TSAR	Stramenopiles	Gyrista	Chrysophyceae	Ochromonadales	Ochromonadaceae	Spumella	Spumella_vulgaris	103	309	19	998	230	149	820	409	1665	19035	8850	14577	2148	2928	3675	1317	1384	24	0	0	0	0	0	0	643	3014
ASV_7	Eukaryota	Obazoa	Opisthokonta	Fungi	Ascomycota	Pezizomycotina	unclassified_Pezizomycotina	unclassified_Pezizomycotina	unclassified_Pezizomycotina	102	770	0	135	0	0	0	0	8762	31988	833	7191	298	205	0	0	392	16	0	0	0	0	0	0	30	138
ASV_8	Eukaryota	TSAR	Alveolata	Ciliophora	Colpodea	Colpodea_X	unclassified_Colpodea_X	unclassified_Colpodea_X	unclassified_Colpodea_X	0	0	47	0	0	0	0	0	35	51	44205	2942	221	794	0	0	0	0	22	0	0	0	0	0	0	131
ASV_9	Eukaryota	Archaeplastida	Streptophyta	Streptophyta_X	Embryophyceae	Embryophyceae_X	Embryophyceae_XX	unclassified_Embryophyceae_XX	unclassified_Embryophyceae_XX	7	0	42560	661	4	4	0	46	0	0	9	0	0	0	0	12	0	0	7	0	3	4138	0	0	0	0
ASV_10	Eukaryota	Excavata	Discoba	Euglenozoa	Kinetoplastea	unclassified_Kinetoplastea	unclassified_Kinetoplastea	unclassified_Kinetoplastea	unclassified_Kinetoplastea	266	71	103	1782	3392	64	448	516	2375	560	103	630	464	984	186	6735	2812	5226	1231	4767	9055	284	0	0	906	1128
ASV_11	Eukaryota	Archaeplastida	Chlorophyta	Chlorophyta_X	Trebouxiophyceae	Microthamniales	Microthamniales_X	Trebouxia	Trebouxia_crenulata	74	110	308	1193	81	124	908	123	0	30	3	20	3301	4	1053	2383	13	883	68	1282	22	60	29	30901	169	0
ASV_12	Eukaryota	TSAR	Alveolata	Ciliophora	Oligohymenophorea	Peritrichia_2	Sessilida	Opisthonecta	Opisthonecta_minima	1568	193	1858	810	2001	644	600	522	388	74	310	59	598	910	2541	1784	2306	5090	5076	10130	1275	2137	0	4	0	42
ASV_13	Eukaryota	TSAR	Alveolata	Ciliophora	Spirotrichea	Euplotia	Euplotidae	Euplotes	Euplotes_euryhalinus	1132	6202	391	1717	4171	12387	2691	359	0	138	0	140	107	934	993	0	4062	2860	943	0	0	265	0	0	560	0
ASV_14	Eukaryota	Obazoa	Opisthokonta	Fungi	Ascomycota	Pezizomycotina	Dothideomycetes	Phoma	Phoma_macrostoma_var._macrostoma	2677	823	0	2379	0	0	0	0	49	137	0	298	235	155	0	0	1121	0	0	0	0	0	0	0	0	27139
ASV_15	Eukaryota	Obazoa	Opisthokonta	Fungi	Ascomycota	Pezizomycotina	Eurotiomycetes	Eupenicillium	Eupenicillium_crustaceum	9536	30	0	48	0	0	0	0	60	59	368	21415	264	2393	0	0	11	0	6	27	9	0	0	0	25	0
ASV_16	Eukaryota	TSAR	Rhizaria	Cercozoa	Filosa-Thecofilosea	Cryomonadida	Rhogostoma-lineage	unclassified_Rhogostoma-lineage	unclassified_Rhogostoma-lineage	0	29842	31	565	0	0	14	0	0	35	222	526	0	403	0	0	54	0	0	0	0	226	0	0	0	365
ASV_17	Eukaryota	unclassified_Eukaryota	unclassified_Eukaryota	unclassified_Eukaryota	unclassified_Eukaryota	unclassified_Eukaryota	unclassified_Eukaryota	unclassified_Eukaryota	unclassified_Eukaryota	53	13	717	0	59	34	201	98	21	0	0	39	6	0	87	148	9	108	2441	0	14116	328	8479	0	46	0
ASV_18	Eukaryota	unclassified_Eukaryota	unclassified_Eukaryota	unclassified_Eukaryota	unclassified_Eukaryota	unclassified_Eukaryota	unclassified_Eukaryota	unclassified_Eukaryota	unclassified_Eukaryota	12	2	236	6	17	109	23	51	0	0	0	0	2	0	23	1179	0	1816	19820	57	2043	12	3	4	183	0
ASV_19	Eukaryota	Obazoa	Opisthokonta	Fungi	unclassified_Fungi	unclassified_Fungi	unclassified_Fungi	unclassified_Fungi	unclassified_Fungi	2935	4901	9835	1428	0	0	1299	0	3	265	0	904	0	0	0	0	2840	0	4	0	0	0	0	0	65	25
ASV_20	Eukaryota	Obazoa	Opisthokonta	Fungi	unclassified_Fungi	unclassified_Fungi	unclassified_Fungi	unclassified_Fungi	unclassified_Fungi	835	0	182	19361	66	26	0	0	0	0	0	1568	41	134	0	0	71	0	0	6	0	0	0	0	421	0
ASV_21	Eukaryota	Obazoa	Opisthokonta	Fungi	Basidiomycota	Pucciniomycotina	Cystobasidiomycetes	Rhodotorula	unclassified_Rhodotorula	106	986	0	195	65	23	0	0	862	7411	359	8329	925	2271	0	0	715	5	0	0	0	0	0	0	95	150
ASV_22	Eukaryota	Obazoa	Opisthokonta	Metazoa	Tardigrada	Tardigrada_X	Tardigrada_XX	Diphascon	Diphascon_sp.	0	0	0	0	0	18	0	0	0	0	0	0	0	10	0	0	0	0	0	0	0	22417	0	0	0	0
ASV_23	Eukaryota	Obazoa	Opisthokonta	Metazoa	Rotifera	Rotifera_X	Rotifera_XX	unclassified_Rotifera_XX	unclassified_Rotifera_XX	471	5175	493	4770	0	3553	0	0	0	85	0	79	26	0	53	0	943	0	0	0	0	1270	0	0	4808	0
ASV_25	Eukaryota	Archaeplastida	Chlorophyta	Chlorophyta_X	Chlorophyceae	Chlamydomonadales	Chlamydomonadales_X	Dunaliella	unclassified_Dunaliella	0	6	8	0	0	0	43	0	0	0	0	0	0	0	0	0	4	11	12	0	3338	0	17974	0	0	0
ASV_26	Eukaryota	Obazoa	Opisthokonta	Metazoa	Rotifera	Rotifera_X	Rotifera_XX	Adineta	Adineta_vaga	1061	530	146	1588	570	1538	0	0	0	0	0	5374	162	6734	0	15	0	0	1765	0	0	1592	0	0	0	0
ASV_27	Eukaryota	Obazoa	Opisthokonta	Fungi	Ascomycota	Pezizomycotina	Dothideomycetes	Dothidea	unclassified_Dothidea	2304	2288	4008	4620	1393	3275	59	171	0	662	5	127	382	0	0	0	28	0	0	0	0	0	0	0	0	0
ASV_28	Eukaryota	Obazoa	Opisthokonta	Fungi	Basidiomycota	Agaricomycotina	Agaricomycetes	Mrakiella	Mrakiella_aquatica	3581	5013	309	912	3566	4415	0	0	0	70	0	17	0	0	0	0	199	0	0	0	0	0	0	0	31	0
ASV_29	Eukaryota	Obazoa	Opisthokonta	Fungi	Basidiomycota	Agaricomycotina	Tremellomycetes	Cryptococcus	Cryptococcus_sp.	3042	3072	142	4669	0	0	0	0	84	1150	0	2530	2690	195	0	0	234	3	0	0	0	0	0	0	142	0
ASV_30	Eukaryota	TSAR	Alveolata	Ciliophora	Spirotrichea	Hypotrichia	Halteriidae	Halteria	Halteria_grandinella	0	0	133	14	0	279	81	331	0	0	0	0	0	0	1317	0	0	920	0	14010	0	0	0	682	0	0
ASV_31	Eukaryota	Obazoa	Opisthokonta	Metazoa	Nematoda	Chromadorea	Chromadorea_X	unclassified_Chromadorea_X	unclassified_Chromadorea_X	0	0	1434	722	0	0	0	6004	0	0	11	0	0	0	877	4	0	1226	1433	0	0	4598	0	0	73	555
ASV_33	Eukaryota	TSAR	Alveolata	Ciliophora	Spirotrichea	Hypotrichia	Oxytrichidae	unclassified_Oxytrichidae	unclassified_Oxytrichidae	0	12	0	0	0	0	0	0	784	4850	274	2422	0	3574	0	0	6	0	0	0	0	0	0	0	0	4974
ASV_35	Eukaryota	TSAR	Alveolata	Ciliophora	Spirotrichea	Hypotrichia	Oxytrichidae	Oxytrichidae_X	Oxytrichidae_X_sp.	1939	876	2673	640	4901	1974	96	302	0	598	773	503	36	26	124	0	43	295	0	0	0	0	0	0	161	138
ASV_36	Eukaryota	TSAR	Alveolata	Ciliophora	Litostomatea	unclassified_Litostomatea	unclassified_Litostomatea	unclassified_Litostomatea	unclassified_Litostomatea	0	12	0	0	0	0	0	0	0	6	170	0	3247	2029	0	0	151	0	0	0	0	1883	0	0	0	8350
ASV_37	Eukaryota	TSAR	Stramenopiles	Gyrista	Chrysophyceae	Ochromonadales	Ochromonadaceae	Spumella	unclassified_Spumella	221	26	49	75	126	43	705	3813	30	58	0	52	3221	0	1113	764	29	177	688	1773	340	0	0	0	388	0
ASV_38	Eukaryota	TSAR	Stramenopiles	Gyrista	Chrysophyceae	Ochromonadales	Ochromonadaceae	Spumella	unclassified_Spumella	104	329	272	189	88	0	563	5108	50	74	0	325	868	168	2066	1453	644	768	0	0	0	0	0	0	386	80
ASV_39	Eukaryota	unclassified_Eukaryota	unclassified_Eukaryota	unclassified_Eukaryota	unclassified_Eukaryota	unclassified_Eukaryota	unclassified_Eukaryota	unclassified_Eukaryota	unclassified_Eukaryota	0	46	10	16	0	3	0	0	3503	4920	2406	1860	51	78	0	0	15	0	0	0	0	0	0	0	31	0
ASV_41	Eukaryota	unclassified_Eukaryota	unclassified_Eukaryota	unclassified_Eukaryota	unclassified_Eukaryota	unclassified_Eukaryota	unclassified_Eukaryota	unclassified_Eukaryota	unclassified_Eukaryota	0	0	0	0	0	0	0	0	0	0	13	0	0	0	0	0	0	0	12065	0	0	0	0	0	0	0
ASV_43	Eukaryota	TSAR	Stramenopiles	Gyrista	Chrysophyceae	Ochromonadales	Ochromonadaceae	Spumella	Spumella_bureschii	37	54	0	0	41	29	520	323	51	62	5148	256	132	151	303	265	66	1036	154	1532	52	224	0	28	47	484
ASV_44	Eukaryota	unclassified_Eukaryota	unclassified_Eukaryota	unclassified_Eukaryota	unclassified_Eukaryota	unclassified_Eukaryota	unclassified_Eukaryota	unclassified_Eukaryota	unclassified_Eukaryota	0	3	49	3	23	0	17	14	0	0	0	7	3	0	0	0	6	18	10	0	10344	60	126	0	0	0
ASV_45	Eukaryota	unclassified_Eukaryota	unclassified_Eukaryota	unclassified_Eukaryota	unclassified_Eukaryota	unclassified_Eukaryota	unclassified_Eukaryota	unclassified_Eukaryota	unclassified_Eukaryota	102	247	801	32	96	27	320	139	32	66	0	120	0	0	1092	108	117	905	1388	1302	2933	498	0	0	146	0
ASV_46	Eukaryota	TSAR	Stramenopiles	Gyrista	Chrysophyceae	Ochromonadales	Ochromonadaceae	Spumella	Spumella_elongata	54	28	256	18	24	0	76	33	20	92	101	313	345	378	4012	0	12	43	9	2180	1090	211	103	238	174	192
ASV_47	Eukaryota	TSAR	Alveolata	Ciliophora	Oligohymenophorea	Peritrichia_2	Sessilida	unclassified_Sessilida	unclassified_Sessilida	0	0	5	0	0	0	0	0	2715	0	4594	2531	0	0	0	0	0	0	0	0	0	0	0	0	0	0
ASV_48	Eukaryota	unclassified_Eukaryota	unclassified_Eukaryota	unclassified_Eukaryota	unclassified_Eukaryota	unclassified_Eukaryota	unclassified_Eukaryota	unclassified_Eukaryota	unclassified_Eukaryota	1871	4	835	4	0	0	0	0	957	0	3439	2078	0	67	0	0	503	0	3	0	0	0	0	0	22	0
ASV_49	Eukaryota	unclassified_Eukaryota	unclassified_Eukaryota	unclassified_Eukaryota	unclassified_Eukaryota	unclassified_Eukaryota	unclassified_Eukaryota	unclassified_Eukaryota	unclassified_Eukaryota	0	20	3516	0	0	142	147	2919	0	0	3	0	0	0	43	0	12	2209	3	0	0	0	0	0	725	0
ASV_50	Eukaryota	TSAR	Rhizaria	Cercozoa	Filosa-Thecofilosea	Cryomonadida	Rhogostoma-lineage	unclassified_Rhogostoma-lineage	unclassified_Rhogostoma-lineage	0	1654	0	7437	0	0	0	0	0	0	0	0	0	0	0	0	502	0	0	0	0	0	0	0	0	0
ASV_51	Eukaryota	Obazoa	Opisthokonta	Fungi	Ascomycota	Pezizomycotina	Leotiomycetes	Thelebolus	unclassified_Thelebolus	4465	1888	16	1102	22	35	0	0	0	133	0	1000	589	14	0	0	121	0	0	0	0	0	0	0	0	71
ASV_52	Eukaryota	TSAR	Rhizaria	Cercozoa	Filosa-Sarcomonadea	Cercomonadida	Cercomonadidae	Cercomonas	Cercomonas_celer	0	0	20	0	0	0	0	0	2539	854	1714	3335	437	242	0	0	0	0	0	0	0	0	0	0	0	56
ASV_54	Eukaryota	Obazoa	Opisthokonta	Metazoa	unclassified_Metazoa	unclassified_Metazoa	unclassified_Metazoa	unclassified_Metazoa	unclassified_Metazoa	29	27	341	138	5	4	0	0	28	35	62	437	897	1867	0	0	321	4	0	0	0	25	0	0	256	4185
ASV_55	Eukaryota	TSAR	Alveolata	Ciliophora	Oligohymenophorea	Scuticociliatia_2	Scuticociliatia_2_X	unclassified_Scuticociliatia_2_X	unclassified_Scuticociliatia_2_X	24	2	4	11	27	0	23	26	0	15	33	349	4505	926	0	0	172	0	75	0	4	2255	0	0	118	0
ASV_56	Eukaryota	TSAR	Alveolata	Ciliophora	unclassified_Ciliophora	unclassified_Ciliophora	unclassified_Ciliophora	unclassified_Ciliophora	unclassified_Ciliophora	0	0	0	0	0	31	112	0	0	0	0	0	0	0	88	0	0	0	0	0	0	7937	0	0	0	0
ASV_58	Eukaryota	Excavata	Discoba	Discoba_X	Heterolobosea	Acrasida	Acrasidae	Allovahlkampfia	Allovahlkampfia_spelaea	0	0	127	0	29	34	59	27	0	0	0	0	0	0	412	0	0	131	16	6826	0	50	0	101	0	0
ASV_59	Eukaryota	Obazoa	Opisthokonta	Metazoa	unclassified_Metazoa	unclassified_Metazoa	unclassified_Metazoa	unclassified_Metazoa	unclassified_Metazoa	0	0	0	0	0	0	0	0	0	0	6	64	3018	4677	0	0	0	0	0	0	0	0	0	0	0	0
ASV_60	Eukaryota	Obazoa	Opisthokonta	Metazoa	Rotifera	Rotifera_X	Rotifera_XX	Adineta	Adineta_vaga	168	0	0	0	532	356	0	0	0	0	0	0	0	0	0	0	0	3695	2946	0	0	0	0	0	0	0
ASV_61	Eukaryota	TSAR	Alveolata	Ciliophora	Oligohymenophorea	Peniculia	unclassified_Peniculia	unclassified_Peniculia	unclassified_Peniculia	0	0	0	0	0	0	0	0	0	0	0	0	0	0	0	0	0	0	0	0	0	7676	0	0	0	0
ASV_62	Eukaryota	TSAR	Stramenopiles	Gyrista	Chrysophyceae	Ochromonadales	Ochromonadaceae	Spumella	Spumella_bureschii	50	91	88	68	0	0	130	560	57	293	3068	588	313	191	758	252	70	220	89	0	0	524	0	0	240	0
ASV_63	Eukaryota	TSAR	Rhizaria	Cercozoa	Filosa-Thecofilosea	Cryomonadida	Rhogostoma-lineage	unclassified_Rhogostoma-lineage	unclassified_Rhogostoma-lineage	558	419	1789	1921	978	372	21	33	0	0	0	0	0	0	10	0	18	689	350	0	0	325	0	0	14	0
ASV_64	Eukaryota	TSAR	Alveolata	Ciliophora	Colpodea	Colpodea_X	Platyophryida	Platyophrya	Platyophrya_sp.	9	72	0	316	196	57	0	0	310	411	158	490	0	571	0	0	0	0	0	0	0	0	0	0	0	4617
ASV_65	Eukaryota	TSAR	Alveolata	Ciliophora	Spirotrichea	Hypotrichia	Urostylidae	Pseudonotohymena	Pseudonotohymena_antarctica	0	760	0	0	131	2595	900	0	2191	0	0	0	0	0	347	0	0	0	0	0	0	0	0	0	0	0
ASV_66	Eukaryota	unclassified_Eukaryota	unclassified_Eukaryota	unclassified_Eukaryota	unclassified_Eukaryota	unclassified_Eukaryota	unclassified_Eukaryota	unclassified_Eukaryota	unclassified_Eukaryota	0	0	0	0	0	12	0	0	0	0	0	0	0	0	0	0	0	0	0	0	6701	5	0	0	0	0
ASV_67	Eukaryota	unclassified_Eukaryota	unclassified_Eukaryota	unclassified_Eukaryota	unclassified_Eukaryota	unclassified_Eukaryota	unclassified_Eukaryota	unclassified_Eukaryota	unclassified_Eukaryota	0	0	301	28	0	0	66	55	0	0	0	0	0	0	0	0	0	52	0	44	4973	126	793	0	149	0
ASV_68	Eukaryota	Obazoa	Opisthokonta	Metazoa	Rotifera	Rotifera_X	Rotifera_XX	unclassified_Rotifera_XX	unclassified_Rotifera_XX	181	1758	121	1408	0	1041	0	0	0	0	0	0	0	0	0	0	379	0	0	5	0	316	0	0	1371	0
ASV_69	Eukaryota	Obazoa	Opisthokonta	Fungi	Ascomycota	Pezizomycotina	Eurotiomycetes	Cyphellophora	Cyphellophora_oxyspora	205	1838	0	468	47	77	0	0	124	1056	14	633	66	197	0	0	1513	0	0	0	0	0	0	0	0	190
ASV_70	Eukaryota	unclassified_Eukaryota	unclassified_Eukaryota	unclassified_Eukaryota	unclassified_Eukaryota	unclassified_Eukaryota	unclassified_Eukaryota	unclassified_Eukaryota	unclassified_Eukaryota	0	0	92	0	0	0	0	154	0	0	0	0	0	0	0	86	0	0	5908	45	0	0	0	0	93	0
ASV_71	Eukaryota	TSAR	Rhizaria	Cercozoa	Filosa-Imbricatea	Euglyphida	Paulinellidae	Paulinella	Paulinella_sp.	0	0	0	0	0	0	0	0	0	0	0	0	0	2	0	0	0	0	3092	0	10	3265	0	0	0	0
ASV_72	Eukaryota	Amoebozoa	Tubulinea	Tubulinea_X	Elardia	Euamoebida	Vermamoebidae	Hartmannella	Hartmannella_vermiformis	191	211	570	23	28	39	199	231	6	0	0	17	0	0	234	118	0	488	209	3608	0	120	0	0	14	0
ASV_73	Eukaryota	TSAR	Alveolata	Ciliophora	Litostomatea	Litostomatea_X	Litostomatea_XX	unclassified_Litostomatea_XX	unclassified_Litostomatea_XX	354	1678	625	647	705	0	449	155	0	0	0	0	0	0	22	0	944	0	145	0	0	0	0	0	348	137
ASV_74	Eukaryota	unclassified_Eukaryota	unclassified_Eukaryota	unclassified_Eukaryota	unclassified_Eukaryota	unclassified_Eukaryota	unclassified_Eukaryota	unclassified_Eukaryota	unclassified_Eukaryota	149	13	88	13	224	105	1292	504	0	14	0	126	81	22	31	3121	29	0	164	0	9	18	0	2	53	0
[truncated: 1,888 more rows]

## Sheet: S8
Table S8. Influence of variables on 16S and 18S soil communities by ANOVA-like permutation tests
[truncated: 45 more rows]

[truncated: 14 more sheets: S9, S10, S11, S12, S13, S14, S15, S16, S17, S18, S19, S20, S21, S22]
