# Supplementary material for: Persistent Petroleum Pollution: Microbial Responses in Bunger Hills, East Antarctica
Source: Research Square preprint supplement (doi:10.21203/rs.3.rs-6608817/v1), 2025-08-20
Supplement: Supplementary file 2 [file cd47a1543bd1a5f3380631da.docx]

**Table 1. Summary of new taxa proposed.** In parentheses, equivalent placeholder names appearing in the GTDB. Full descriptions are provided in the supplementary materials.

| **Domain** | **Phylum** | **Class** | **Order** | **Family** | **Genus** | **Species** | **Type** |
| --- | --- | --- | --- | --- | --- | --- | --- |
| *Archaea* | *Thermoproteota* | *Nitrososphaeria* | *Nitrososphaerales* | *Nitrososphaeraceae* | *Nitrosobungeria* gen. nov. (g__TH5893) | *Nitrosobungeria shackeltonensis* sp. nov. | BH-18_THE2 |
|  |  |  |  |  | *Nitrosomicrobium* gen. nov. (g__TA-21) | *Nitrosomicrobium frigidus* sp. nov. (s__TA-21 sp023251115) | BH-18_THE1 |
| *Bacteria* | *Actinomycetota* | *Acidimicrobiia* | *Acidimicrobiales* | *Iamiaceae* | *Aquihabitans* | *Aquihabitans niveus* sp. nov. | BH-10_ACT1 |
|  |  |  | *Spongiisociales* (o__UBA5794) | *Hadalibacteraceae* (f__UBA5794) | *Gelisolibacter* gen. nov. (g__JACDBE01) | *Gelisolibacter meridionalis* sp. nov. | BH-24_ACT7 |
|  |  | *Actinomycetes* | *Actinomycetales* | *Dermatophilaceae* | *Cryoornithinimicrobium* gen. nov. (g__Ornithinimicrobium_A) | *Cryoornithinimicrobium bungerii* sp. nov. | BH-23_ACT6 |
|  |  |  | *Propionibacteriales* | *Nocardioidaceae* | *Nocardioides* | *Nocardioides polaris* sp. nov. | BH-09_ACT11 |
|  |  | *Aridivitia* (c__UBA4738) | *Actinopolariales* ord. nov. (o__CADDZG01) | *Actinopolariaceae* fam. nov. (f__WHSQ01) | *Actinopolaria* gen. nov. | *Actinopolaria aerotropha* sp. nov. | BH-24_ACT26 |
|  |  |  | *Actinosomniales* ord. nov. (o__UBA4738) | *Actinosomniaceae* fam. nov. (f__UBA4738) | *Actinosomnia* gen. nov. (g__JACDCJ01) | *Actinosomnia pattersoniae* sp. nov. (s__JACDCJ01 sp013817655) | BH-20_ACT24 |
|  |  |  | *Bungeriellales* ord. nov. (o__JAHWKV01) | *Bungeriellaceae* fam. nov. (f__JAHWKV01) | *Bungeriella* gen. nov. (g__JAJCYE01) | *Bungeriella frigidisoli* sp. nov. | BH-23_ACT12 |
|  | *Armatimonadota* | *Fimbriimonadia* | *Fimbriimonadales* | *Fimbriimonadaceae* | *Fimbriimonas* | *Fimbriimonas antarctica* sp. nov. | BH-11_ARM2 |
|  | *Bacteroidota* | *Bacteroidia* | *Chitinophagales* | *Chitinophagaceae* | *Panacibacter* | *Panacibacter polaris* sp. nov. | BH-10_BAC2 |
|  |  |  |  |  | *Wilkeslandia* gen. nov. | *Wilkeslandia alcanivorans* sp. nov. | BH-09_BAC2 |
|  |  |  | *Cytophagales* | *Hymenobacteraceae* | *Pseudopontibacter* gen. nov. | *Pseudopontibacter australis* sp. nov. | BH-24_BAC1 |
|  |  | *Ignavibacteria* | *Tepidiaquacellales* (o__SJA-28) | *Ventifactibacteraceae* fam. nov. (f__B-1AR) | *Ventifactibacter* gen. nov. | *Ventifactibacter hollidayae* sp. nov. | BH-10_BAC5 |
|  | *Cyanobacteriota* | *Vampirovibrionia* | *Obscuribacterales* | *Obscuribacteraceae* | *Psychrobscuribacter* gen. nov. | *Psychrobscuribacter pollutisoli* sp. nov. | BH-10_CYA1 |
|  | *Gemmatimonadota* | *Gemmatimonadetes* | *Cryogemmatales* ord. nov. (o__JACCXV01) | *Cryogemmataceae* fam. nov. (f__JAHWKZ01) | *Cryogemmata* gen. nov. | *Cryogemmata carboxiditropha* sp. nov. | BH-18_GEM1 |
|  | *Patescibacteria* | *Nanosomnibacteria* class. nov. (c__UBA1384) | *Nanosomnibacterales* ord. nov. (o__CAILIB01) | *Nanosomnibacteraceae* fam. nov. (f__CAILIB01) | *Nanosomnibacter* gen. nov. (g__CALBLZ01) | *Nanosomnibacter parvus* sp. nov. | BH-11_PAT4 |
|  | *Planctomycetota* | *Phycisphaerae* | *Phycisphaerales* | *Frigidisphaeraceae* fam. nov. (f__UBA1924) | *Frigidisphaera* gen. nov. (g__JACVCS01) | *Frigidisphaera bungerii* sp. nov. | BH-11_PLA1 |
|  |  | *Planctomycetia* | *Gemmatales* | *Gemmataceae* | *Cryolimnoglobus* gen. nov. | *Cryolimnoglobus antarcticus* sp. nov. | BH-11_PLA2 |
|  | *Pseudomonadota* | *Alphaproteobacteria* | *Caulobacterales* | *Caulobacteraceae* | *Brevundimonas* | *Brevundimonas antarctica* sp. nov. | BH-09_PSE1 |
|  |  | *Gammaproteobacteria* | *Burkholderiales* | *Burkholderiaceae* | *Frigidisolicola* gen. nov. | *Frigidisolicola castellviae* sp. nov. | BH-10_PSE17 |
|  |  |  | *Dormimicrobiales* ord. nov. (o__JACDCP01) | *Dormimicrobiaceae* fam. nov. (f__JACDCP01) | *Dormimicrobium* gen. nov. (g__JACDCP01) | *Dormimicrobium murphyi* sp. nov. | BH-24_PSE2 |
|  | *Verrucomicrobiota* | *Verrucomicrobiae* | *Chthoniobacterales* | *Terrimicrobiaceae* | *Cryoterrimicrobium* gen. nov. | *Cryoterrimicrobium chapmanii* sp. nov. | BH-09_VER1 |
|  |  |  | *Verrucomicrobiales* | *Verrucomicrobiaceae* | *Verrucomicrobium* | *Verrucomicrobium antarcticum* sp. nov. | BH-11_VER1 |
